# Supplementary material for: Marginal Zone B cells produce 'natural' atheroprotective IgM antibodies in a T-cell-dependent manner
Source: Research Square preprint supplement (doi:10.21203/rs.3.rs-1753743/v1), 2022-06-17
Supplement: Supplementary file 1 [file 0efd351bc9f2f2b1f92ccae6.xlsx]

## Sheet: All DEGs
ensembl_gene_id	baseMean	log2FoldChange	lfcSE	pvalue	padj	external_gene_name	description	chromosome_name	NT_REP1	NT_REP2	NT_REP3	NT_REP4	NT_REP5	NT_REP6	WT_REP1	WT_REP2	WT_REP3	WT_REP4	WT_REP5
ENSMUSG00000000001	630.257	0.0137267	0.0627085	0.321655	0.935103	Gnai3	guanine nucleotide binding protein (G protein), alpha inhibiting 3	3	11.1166	10.9698	10.9229	10.8708	10.9835	11.0751	11.0611	10.616	10.8387	10.9593	10.9357
ENSMUSG00000000028	15.068	-0.00162501	0.0621203	0.227727	0.935103	Cdc45	cell division cycle 45	16	9.85374	9.85374	9.74934	9.81693	9.9952	10.0523	9.85374	10.1467	9.88707	10.0395	9.94852
ENSMUSG00000000056	362.871	-0.01075	0.0629395	0.185159	0.935103	Narf	nuclear prelamin A recognition factor	11	10.5814	10.4572	10.5027	10.3677	10.989	10.6849	10.6018	11.0896	10.894	10.5729	10.7663
ENSMUSG00000000058	8.49674	0.00153079	0.0621417	0.0601147	0.881744	Cav2	caveolin 2	6	9.89915	9.84051	10.1843	9.76257	9.76257	9.94547	9.84051	9.84051	9.80614	9.76257	9.76257
ENSMUSG00000000078	1160.33	0.00808141	0.0607603	0.601596	0.938271	Klf6	Kruppel-like factor 6	13	11.2234	11.1788	11.1732	11.2632	11.3022	11.3632	11.0885	11.3554	11.4187	11.0575	10.9027
ENSMUSG00000000085	194.107	0.00428224	0.0618517	0.57272	0.935103	Scmh1	sex comb on midleg homolog 1	4	10.6548	10.1612	10.4382	10.7216	10.4381	10.4296	10.6714	10.3436	10.331	10.4095	10.4362
ENSMUSG00000000088	205.506	0.00266457	0.0615706	0.772308	0.970758	Cox5a	cytochrome c oxidase subunit 5A	9	10.7305	10.3163	10.477	10.4481	10.5845	10.3922	10.6479	10.2121	10.4531	10.4334	10.5485
ENSMUSG00000000093	0.850178	0.000555719	0.0621164	0.570342	0.935103	Tbx2	T-box 2	11	9.81489	9.81489	9.78819	9.78819	9.92815	9.78819	9.81489	9.81489	9.78819	9.78819	9.83517
ENSMUSG00000000120	1.79778	0.00116416	0.0621319	0.168983	0.935103	Ngfr	nerve growth factor receptor (TNFR superfamily, member 16)	11	9.79464	9.94008	9.80844	9.80844	9.96632	9.80844	9.79464	9.79464	9.80844	9.80844	9.80844
ENSMUSG00000000125	7.00338	-0.00108943	0.0621274	0.280002	0.935103	Wnt3	wingless-type MMTV integration site family, member 3	11	9.75213	9.75213	9.85095	9.85095	9.85095	9.85095	9.75213	10.1723	9.89452	9.85095	9.85095
ENSMUSG00000000126	6.27976	-0.000567399	0.0621199	0.533176	0.935103	Wnt9a	wingless-type MMTV integration site family, member 9A	11	9.75153	9.75153	9.85155	9.85155	9.85155	9.85155	9.75153	10.1516	9.85155	9.85155	9.85155
ENSMUSG00000000127	33.6085	0.00147784	0.0620932	0.561081	0.935103	Fer	fer (fms/fps related) protein kinase	17	9.772	10.3524	10.0239	10.1782	10.1107	9.83109	9.772	10.1986	9.98195	10.0764	9.96393
ENSMUSG00000000131	930.821	-0.0172387	0.0642766	0.185267	0.935103	Xpo6	exportin 6	7	11.0183	11.183	11.0889	11.3462	10.8227	10.7872	11.2694	11.0403	11.2252	11.5696	11.0546
ENSMUSG00000000134	164.52	0.0105878	0.0629464	0.176721	0.935103	Tfe3	transcription factor E3	X	10.677	10.4496	10.3798	10.355	10.4525	10.3734	10.0985	10.3338	10.3635	10.4852	10.3186
ENSMUSG00000000148	160.953	0.00789474	0.062236	0.36121	0.935103	Brat1	BRCA1-associated ATM activator 1	5	10.461	10.5342	10.311	10.4063	10.348	10.2713	10.2012	10.2577	10.4671	10.2769	10.464
ENSMUSG00000000149	177.094	-0.0215893	0.066871	0.0428861	0.82554	Gna12	guanine nucleotide binding protein, alpha 12	5	10.4382	10.3021	10.3891	10.1588	10.3124	10.3635	10.2987	10.5705	10.5089	10.628	10.4561
ENSMUSG00000000167	0.734471	0.000714177	0.0621216	0.426511	0.935103	Pih1d2	PIH1 domain containing 2	9	9.81134	9.81134	9.79174	9.79174	9.79174	9.92896	9.81134	9.81134	9.79174	9.79174	9.79174
ENSMUSG00000000168	201.502	-0.00702179	0.0625215	0.104497	0.935103	Dlat	dihydrolipoamide S-acetyltransferase (E2 component of pyruvate dehydrogenase complex)	9	10.1588	10.1696	10.6069	10.0181	10.5579	10.3608	10.3124	11.0079	10.4053	10.6607	10.2757
ENSMUSG00000000171	273.738	0.00353523	0.0615495	0.705299	0.961582	Sdhd	succinate dehydrogenase complex, subunit D, integral membrane protein	9	10.8225	10.6167	10.4582	10.4761	10.5872	10.6801	10.6394	10.2479	10.5203	10.6226	10.7269
ENSMUSG00000000182	1.44949	0.000280201	0.0621159	0.390446	0.935103	Fgf23	fibroblast growth factor 23	6	9.80184	9.80184	9.96961	9.80124	9.80124	9.80124	9.89567	9.80184	9.80124	9.80124	9.80124
ENSMUSG00000000184	1100.08	-0.00939157	0.0628441	0.114896	0.935103	Ccnd2	cyclin D2	6	10.7925	10.9491	10.9991	11.2562	11.3767	11.0696	10.6342	12.4412	11.5125	11.1186	11.097
ENSMUSG00000000194	592.013	-0.00251351	0.0614848	0.780994	0.97236	Gpr107	G protein-coupled receptor 107	2	10.8826	10.6239	10.8058	11.2939	10.5737	10.9151	10.773	11.1686	10.6916	10.7601	10.994
ENSMUSG00000000244	670.368	-0.0115728	0.0622282	0.35958	0.935103	Tspan32	tetraspanin 32	7	10.8848	10.8389	10.8	11.0628	10.918	11.237	10.9971	11.2941	11.0847	11.0652	10.8581
ENSMUSG00000000248	1.23996	0.00105202	0.0621276	0.320263	0.935103	Clec2g	C-type lectin domain family 2, member g	6	9.78644	9.94903	9.81664	9.81664	9.88976	9.81664	9.78644	9.78644	9.81664	9.81664	9.81664
ENSMUSG00000000253	10.0741	0.000186585	0.0621162	0.238519	0.935103	Gmpr	guanosine monophosphate reductase	13	9.75275	9.75275	9.85033	9.85033	9.85033	10.0088	9.75275	10.2336	9.85033	9.85033	9.85033
ENSMUSG00000000275	1025.31	0.00290228	0.0614823	0.761663	0.969546	Trim25	tripartite motif-containing 25	11	11.6248	11.0572	11.0119	11.3627	11.0921	11.2914	11.4871	10.6697	11.3991	11.058	11.2529
ENSMUSG00000000276	95.2549	0.00229799	0.0620122	0.613995	0.940733	Dgke	diacylglycerol kinase, epsilon	11	9.89058	10.4222	10.0811	10.4145	10.1898	10.3383	10.1868	10.3391	10.0379	10.2646	10.1415
ENSMUSG00000000278	397.171	0.00837394	0.0622944	0.352058	0.935103	Scpep1	serine carboxypeptidase 1	11	11.141	10.3795	10.7965	10.8105	10.7149	10.714	10.5235	10.8126	10.5208	10.78	10.6625
ENSMUSG00000000282	496.278	-0.00875176	0.0623503	0.331448	0.935103	Mnt	max binding protein	11	10.6125	10.9568	10.7396	10.5551	10.6803	10.918	11.0148	10.6078	11.324	10.8123	10.5564
ENSMUSG00000000290	1234.48	0.00480099	0.0596777	0.785309	0.97236	Itgb2	integrin beta 2	10	11.3989	11.597	11.4381	11.353	11.4038	11.3282	11.4201	11.1994	11.3479	11.2952	11.6607
ENSMUSG00000000295	196.111	0.0057573	0.0621471	0.380164	0.935103	Hddc2	HD domain containing 2	10	10.7421	10.0136	10.67	10.4386	10.4783	10.5453	10.6648	10.4345	10.3967	10.2938	10.4236
ENSMUSG00000000301	1.15443	-0.000467539	0.0621114	0.72983	0.966487	Pemt	phosphatidylethanolamine N-methyltransferase	11	9.82109	9.82109	9.782	9.782	9.87638	9.782	9.82109	9.82109	9.91972	9.82351	9.782
ENSMUSG00000000305	3.5073	0.000483439	0.0621188	0.528959	0.935103	Cdh4	cadherin 4	2	9.76411	10.0635	9.83897	9.83897	9.83897	9.83897	9.76411	9.76411	9.83897	9.83897	9.83897
ENSMUSG00000000320	1.46894	0.000747135	0.0621226	0.29902	0.935103	Alox12	arachidonate 12-lipoxygenase	11	9.8154	9.8154	9.78768	9.78768	9.78768	9.98167	9.8154	9.8154	9.78768	9.78768	9.78768
ENSMUSG00000000326	153.315	0.0093671	0.0629297	0.0912951	0.935103	Comt	catechol-O-methyltransferase	16	10.0271	10.8217	10.2796	10.6834	10.2515	10.44	10.3383	10.2055	10.3001	10.225	10.2574
ENSMUSG00000000339	124.978	0.00027569	0.0619481	0.955739	0.996766	Rtca	RNA 3'-terminal phosphate cyclase	3	9.91373	10.5938	10.3417	10.0991	10.3176	10.2063	10.1434	10.4167	10.2269	10.2909	10.3858
ENSMUSG00000000340	235.559	-0.00443832	0.0621246	0.372227	0.935103	Dbt	dihydrolipoamide branched chain transacylase E2	3	10.4294	10.9067	10.5773	10.4107	10.3258	10.1491	10.5093	10.1723	11.0093	10.452	10.607
ENSMUSG00000000346	1150.86	-0.00291253	0.060944	0.85732	0.984022	Dazap2	DAZ associated protein 2	15	11.2476	11.1406	11.2882	11.1575	11.4275	11.6307	11.7506	11.1415	11.2999	11.1578	11.279
ENSMUSG00000000355	71.6431	0.0123887	0.0634937	0.10373	0.935103	Mcts1	malignant T cell amplified sequence 1	X	10.1824	10.2857	10.2995	10.2257	10.2003	10.3344	10.1785	10.1677	10.2598	10.0023	10.1029
ENSMUSG00000000365	30.4798	0.00417873	0.062294	0.0515645	0.852077	Rnf17	ring finger protein 17	14	9.90116	10.1131	9.85943	9.88691	9.80531	10.418	9.90116	9.90116	9.85278	9.83317	10.0234
ENSMUSG00000000374	434.848	0.013787	0.0639424	0.0657144	0.906843	Trappc10	trafficking protein particle complex 10	10	10.8584	10.6099	10.4716	10.9084	10.5761	11.4643	10.5828	10.7844	10.4656	10.5349	10.5412
ENSMUSG00000000378	580.769	-0.00670239	0.061255	0.605142	0.939563	Ccm2	cerebral cavernous malformation 2	11	10.9749	10.636	10.8256	10.9234	10.983	11.0641	11.1887	10.9095	10.9146	11.0078	10.7724
ENSMUSG00000000384	160.587	0.00330766	0.062098	0.41003	0.935103	Tbrg4	transforming growth factor beta regulated gene 4	11	10.2627	10.593	10.259	10.2055	10.3362	10.1671	10.0284	10.239	10.1326	10.3094	10.5557
ENSMUSG00000000386	14.4828	-0.00300779	0.0621623	0.215118	0.935103	Mx1	MX dynamin-like GTPase 1	16	9.88393	9.88393	9.95338	9.84556	9.95769	9.93357	9.88393	10.0505	9.7946	9.93066	10.0636
ENSMUSG00000000399	248.767	-0.00524361	0.061667	0.594849	0.936825	Ndufa9	NADH:ubiquinone oxidoreductase subunit A9	6	10.7674	10.2897	10.5431	10.3495	10.5894	10.4989	10.5769	10.5139	10.7403	10.4904	10.5473
ENSMUSG00000000409	122.753	0.00551	0.0623149	0.188443	0.935103	Lck	lymphocyte protein tyrosine kinase	4	10.8317	10.1678	10.3123	10.0963	10.4313	10.251	10.0661	10.0535	10.4892	10.1984	10.1799
ENSMUSG00000000420	1669.96	-0.0173652	0.0643603	0.156071	0.935103	Galnt1	polypeptide N-acetylgalactosaminyltransferase 1	18	11.1209	11.5939	11.562	11.7781	11.6589	11.5096	12.0597	11.7951	11.4897	12.0741	11.4243
ENSMUSG00000000439	252.121	0.0134299	0.0640028	0.0339152	0.778895	Mkrn2	makorin, ring finger protein, 2	6	10.5983	10.6253	10.2331	10.3919	10.2533	11.1481	10.1817	10.3787	10.287	10.4079	10.4007
ENSMUSG00000000441	428.707	-0.0103318	0.0624078	0.339152	0.935103	Raf1	v-raf-leukemia viral oncogene 1	6	10.7526	10.644	10.4617	10.9878	10.666	10.7122	10.9507	10.6663	11.0263	10.8057	10.614
ENSMUSG00000000486	1565.32	-0.0157111	0.0629363	0.304707	0.935103	Septin1	septin 1	7	11.3831	11.7088	11.5815	11.4298	11.5587	11.5784	12.0262	11.2632	11.7178	11.6811	11.6198
ENSMUSG00000000530	7.84125	-0.000289921	0.0621007	0.929381	0.993631	Acvrl1	activin A receptor, type II-like 1	15	9.84925	9.84925	9.75383	9.87087	9.79604	10.0831	9.84925	9.90195	10.0255	9.75383	9.75383
ENSMUSG00000000531	4.61889	-0.00277128	0.0621815	0.119055	0.935103	Tamalin	trafficking regulator and scaffold protein tamalin	15	9.82751	9.82751	9.81768	9.77557	9.92175	9.84027	9.82751	10.0022	9.87297	9.9252	9.94487
ENSMUSG00000000532	245.719	0.012507	0.0628154	0.306558	0.935103	Acvr1b	activin A receptor, type 1B	15	10.7001	10.6003	10.5345	10.6599	10.5496	10.3813	10.3402	10.499	10.4806	10.505	10.6333
ENSMUSG00000000538	129.231	-0.00265216	0.061839	0.653911	0.94891	Tom1l2	target of myb1-like 2 (chicken)	11	10.1263	10.1798	10.2317	10.5112	10.3681	10.4326	10.6034	10.4705	10.3146	10.2296	10.3272
ENSMUSG00000000552	198.513	-0.00664594	0.0622387	0.340645	0.935103	Zfp385a	zinc finger protein 385A	15	10.0144	10.6518	10.5089	10.4785	10.223	10.4532	10.5595	10.6101	10.6098	10.5193	10.4201
ENSMUSG00000000561	284.724	-0.00196965	0.0616824	0.79351	0.973783	Wdr77	WD repeat domain 77	3	10.5075	10.4662	10.3033	10.6962	10.6348	10.7702	10.9145	10.3842	10.2969	10.651	10.6242
ENSMUSG00000000563	1214.1	-0.00501483	0.057714	0.872249	0.986858	Atp5pb	ATP synthase peripheral stalk-membrane subunit b	3	11.395	11.39	11.4858	11.3703	11.5046	11.3668	11.5976	11.3139	11.4836	11.411	11.3468
ENSMUSG00000000568	1102.78	-0.0143698	0.0620204	0.386854	0.935103	Hnrnpd	heterogeneous nuclear ribonucleoprotein D	5	11.2968	11.2453	11.5082	11.3646	11.1904	11.1881	11.2642	11.5514	11.477	11.1635	11.4843
ENSMUSG00000000579	30.1814	0.00184701	0.0621133	0.320125	0.935103	Dynlt1c	dynein light chain Tctex-type 1C	17	9.89554	10.2794	9.93411	10.1566	9.85968	9.93608	9.89554	9.89554	9.96126	10.0638	10.029
ENSMUSG00000000581	113.651	0.0157219	0.0644494	0.0757899	0.925479	C1d	C1D nuclear receptor co-repressor	11	10.1618	10.5023	10.4573	10.2924	10.4009	10.3635	10.2055	10.3847	10.209	10.2785	10.1934
ENSMUSG00000000594	2683.83	0.0198684	0.0635389	0.30338	0.935103	Gm2a	GM2 ganglioside activator protein	11	12.4022	12.0492	12.166	11.8314	11.9736	12.0109	11.8337	11.7867	12.045	12.0835	12.0152
ENSMUSG00000000600	267.598	-0.000734595	0.0616663	0.913169	0.991262	Krit1	KRIT1, ankyrin repeat containing	5	10.4113	10.5342	10.5536	10.8467	10.4722	10.5753	10.8291	10.4649	10.2472	10.8244	10.3997
ENSMUSG00000000605	428.717	-0.0058492	0.0619422	0.483092	0.935103	Clcn4	chloride channel, voltage-sensitive 4	7	10.5947	11.0164	10.6764	10.8077	10.6547	10.3053	10.5721	10.7402	11.1646	10.8472	10.6602
ENSMUSG00000000617	35.9835	0.00167423	0.0620862	0.536413	0.935103	Grm6	glutamate receptor, metabotropic 6	11	9.83689	10.2069	10.0722	9.97434	10.2305	10.1048	9.83689	10.2667	10.0124	9.84921	10.0145
ENSMUSG00000000628	193.779	0.00970308	0.0630035	0.0783109	0.929589	Hk2	hexokinase 2	6	10.7547	10.1599	10.6992	10.7317	10.2884	10.4907	10.6552	10.1352	10.2171	10.2093	10.3473
ENSMUSG00000000631	974.127	-0.0132344	0.0636963	0.0852342	0.935103	Myo18a	myosin XVIIIA	11	10.5359	11.095	11.2211	11.3747	11.077	10.937	12.1842	10.9725	11.4735	11.0956	11.1996
ENSMUSG00000000673	423.468	0.000914545	0.0612521	0.93203	0.993986	Haao	3-hydroxyanthranilate 3,4-dioxygenase	17	11.1331	10.4983	10.8006	10.5894	10.7385	10.9447	10.7459	10.762	10.6395	10.8864	10.8946
ENSMUSG00000000682	3163.08	-0.0227221	0.0625598	0.287736	0.935103	Cd52	CD52 antigen	4	12.2518	12.0601	12.2596	12.2005	12.2749	12.0601	12.2365	12.3841	12.1105	12.5012	12.2249
ENSMUSG00000000686	18.6081	0.00210838	0.0621587	0.0826194	0.932339	Abhd15	abhydrolase domain containing 15	11	9.82958	10.2168	10.0001	9.7735	9.7735	10.2425	9.82958	9.82958	9.83511	9.91726	9.9428
ENSMUSG00000000690	1.83459	-0.00109392	0.0621252	0.303877	0.935103	Hoxb6	homeobox B6	11	9.80126	9.80126	9.87476	9.80182	9.80182	9.80182	9.93393	9.80126	9.80182	9.95709	9.80182
ENSMUSG00000000708	337.046	0.00516329	0.0623079	0.204265	0.935103	Kat2b	K(lysine) acetyltransferase 2B	17	11.4225	10.2183	10.2068	10.3973	10.6605	11.1521	10.6114	9.97329	10.1302	10.6188	10.7288
ENSMUSG00000000711	515.048	0.0272438	0.0700186	0.0273703	0.746713	Rab5b	RAB5B, member RAS oncogene family	10	10.8253	11.13	11.0293	10.7576	10.8054	10.902	10.4701	10.7927	10.774	10.6453	10.7182
ENSMUSG00000000731	4.32417	-0.000314339	0.0621073	0.824524	0.976392	Aire	autoimmune regulator (autoimmune polyendocrinopathy candidiasis ectodermal dystrophy)	10	9.84398	9.84398	9.7591	9.7591	9.93306	9.88012	9.84398	9.84398	9.7591	10.0113	9.80608
ENSMUSG00000000732	983.933	0.00635875	0.0594629	0.761288	0.969546	Icosl	icos ligand	10	11.1599	11.4494	11.1062	11.2987	11.3819	11.1639	11.2627	11.1294	11.2986	11.2413	11.2619
ENSMUSG00000000738	357.593	0.0224561	0.067617	0.0162831	0.645541	Spg7	SPG7, paraplegin matrix AAA peptidase subunit	8	11.1101	10.5021	10.8286	10.8807	10.6861	10.8508	10.3512	10.7845	10.4261	10.4708	10.6655
ENSMUSG00000000739	0.686547	-0.000528312	0.062119	0.609297	0.939563	Sult5a1	sulfotransferase family 5A, member 1	8	9.78496	9.78496	9.81812	9.81812	9.81812	9.81812	9.91763	9.78496	9.81812	9.81812	9.81812
ENSMUSG00000000740	19447.4	0.000710088	0.0556765	0.903498	0.990764	Rpl13	ribosomal protein L13	8	14.5528	14.1371	14.4133	14.566	14.413	14.4097	14.464	14.4935	14.4687	14.2988	14.3136
ENSMUSG00000000743	302.873	-0.00284413	0.0611063	0.801501	0.974288	Chmp1a	charged multivesicular body protein 1A	8	10.4588	10.7114	10.5873	10.4594	10.68	10.6352	10.7777	10.4432	10.6833	10.5106	10.6285
ENSMUSG00000000751	599.268	-0.0533714	0.0968719	0.0110909	0.57879	Rpa1	replication protein A1	11	10.6479	10.9329	10.9632	10.7991	10.9818	10.8067	11.0265	11.2211	11.053	11.0976	10.9984
ENSMUSG00000000753	4.61142	-0.000916465	0.0621193	0.248884	0.935103	Serpinf1	serine (or cysteine) peptidase inhibitor, clade F, member 1	11	9.78403	9.78403	9.81906	9.81906	9.92244	9.81906	9.78403	10.0722	9.81906	9.81906	9.97481
ENSMUSG00000000759	369.453	-0.00245233	0.0616715	0.74465	0.968398	Tubgcp3	tubulin, gamma complex associated protein 3	8	10.3704	10.7234	10.5096	10.5002	10.9277	10.8929	11.0417	10.5622	10.472	10.7237	10.6947
ENSMUSG00000000766	3.00432	-0.00130471	0.0621348	0.179857	0.935103	Oprm1	opioid receptor, mu 1	10	9.77422	9.77422	9.82886	9.82886	9.82886	9.82886	10.0393	9.77422	9.82886	9.82886	9.91023
ENSMUSG00000000776	184.429	-0.00127281	0.0618306	0.798317	0.974247	Polr3d	polymerase (RNA) III (DNA directed) polypeptide D	14	10.3573	10.1693	10.6997	10.1386	10.2788	10.6848	10.5931	10.5136	10.285	10.445	10.3261
ENSMUSG00000000782	1.42175	-0.000704377	0.0621033	0.760812	0.969546	Tcf7	transcription factor 7, T cell specific	11	9.82325	9.82325	9.82194	9.77983	9.87421	9.85907	9.82325	9.87596	9.85528	9.77983	9.88486
ENSMUSG00000000787	3090.22	-0.0214248	0.0635829	0.285605	0.935103	Ddx3x	DEAD box helicase 3, X-linked	X	11.9919	12.1695	12.3462	12.156	12.0182	11.9998	12.0413	12.4831	12.312	12.0671	12.301
ENSMUSG00000000804	542.707	-0.00987538	0.0630809	0.0330286	0.775045	Usp32	ubiquitin specific peptidase 32	11	10.0309	10.484	10.6929	10.5524	11.1409	10.5391	10.763	11.894	11.1866	10.84	10.5989
ENSMUSG00000000811	30.3374	-0.00183935	0.0621057	0.38785	0.935103	Txnrd3	thioredoxin reductase 3	6	9.82888	9.9994	9.92004	10.1341	10.0692	9.93909	9.82888	10.3582	9.86133	10.188	9.9151
ENSMUSG00000000823	209.47	0.0101835	0.0631283	0.0561444	0.863618	Zfp512b	zinc finger protein 512B	2	10.2984	10.5833	10.8721	10.4716	10.1385	10.7725	10.1787	10.5765	10.1035	10.2405	10.2658
ENSMUSG00000000826	694.293	0.0248104	0.0682761	0.0526437	0.852077	Dnajc5	DnaJ heat shock protein family (Hsp40) member C5	2	11.0043	11.2917	10.7509	11.3412	11.1656	11.136	10.7813	10.9716	11.075	10.7352	10.8817
ENSMUSG00000000827	196.903	-0.011926	0.0635021	0.0462062	0.836636	Tpd52l2	tumor protein D52-like 2	2	10.0166	10.3371	10.3766	10.514	10.4227	10.2631	10.8223	10.5448	10.6251	10.3989	10.4112
ENSMUSG00000000838	393.264	0.00683878	0.0619676	0.541608	0.935103	Fmr1	FMRP translational regulator 1	X	10.424	11.2125	10.5856	10.8297	10.666	10.7834	10.5277	10.7403	10.7145	10.7632	10.7406
ENSMUSG00000000861	3749.62	-0.0048322	0.0578988	0.824744	0.976392	Bcl11a	B cell CLL/lymphoma 11A (zinc finger protein)	11	12.185	12.562	12.1577	12.3031	12.4773	12.3647	12.2988	12.3777	12.2615	12.4844	12.4425
ENSMUSG00000000876	68.1925	0.00397295	0.0621647	0.345143	0.935103	Pxmp4	peroxisomal membrane protein 4	2	10.0676	10.3621	10.0107	10.3336	9.96702	10.2346	9.91247	10.1649	10.0839	10.2161	10.0413
ENSMUSG00000000881	65.801	0.00115382	0.061811	0.75469	0.969546	Dlg3	discs large MAGUK scaffold protein 3	X	10.0642	10.3982	10.203	10.0443	10.2944	10.2068	10.0784	10.2272	10.2403	10.1125	10.2427
ENSMUSG00000000884	24.0953	-0.000767323	0.0620989	0.475029	0.935103	Gnb1l	guanine nucleotide binding protein (G protein), beta polypeptide 1-like	16	9.8761	9.8761	10.0735	9.72698	10.164	9.92627	9.8761	10.2087	9.91171	9.87075	10.0415
ENSMUSG00000000901	2.27963	-0.000928467	0.0621252	0.271987	0.935103	Mmp11	matrix metallopeptidase 11	10	9.82869	9.82869	9.77439	9.82219	9.77439	9.77439	9.82869	9.82869	9.91884	9.77439	9.9622
ENSMUSG00000000902	561.346	-0.00736077	0.0620479	0.399972	0.935103	Smarcb1	SWI/SNF related, matrix associated, actin dependent regulator of chromatin, subfamily b, member 1	10	10.5258	10.7703	10.7376	11.2135	10.7499	10.9758	10.9877	11.2452	10.8271	10.7167	10.955
ENSMUSG00000000903	69.6296	0.00141259	0.0619303	0.787668	0.972665	Vpreb3	pre-B lymphocyte gene 3	10	10.4036	9.94508	10.1921	10.112	10.0516	10.2457	10.0436	10.2477	10.1754	10.1445	10.1985
ENSMUSG00000000915	913.206	0.00485764	0.0617906	0.591953	0.93638	Hip1r	huntingtin interacting protein 1 related	5	10.5895	11.7501	11.0314	11.5551	11.1076	11.249	10.8565	11.56	11.0967	11.0174	11.2659
ENSMUSG00000000916	70.5533	-3.37558e-05	0.0620211	0.986319	0.999188	Nsun5	NOL1/NOP2/Sun domain family, member 5	5	9.83061	10.4088	10.2045	9.89889	10.3609	10.065	10.4003	9.92188	10.2417	9.95333	10.2584
ENSMUSG00000000934	112.196	-0.00887203	0.0629051	0.046843	0.836636	Top1mt	DNA topoisomerase 1, mitochondrial	15	10.1767	9.93779	10.1143	10.1023	10.186	10.3302	10.959	9.87521	10.2618	10.3396	10.3261
ENSMUSG00000000958	104.529	0.000959199	0.0620271	0.762053	0.969546	Slc7a7	solute carrier family 7 (cationic amino acid transporter, y+ system), member 7	14	10.0156	10.1416	10.6661	10.0161	10.1298	10.1642	10.2807	10.1069	10.0343	9.81464	10.1282
ENSMUSG00000000959	602.976	-0.0268889	0.0692496	0.0458153	0.836636	Oxa1l	oxidase assembly 1-like	14	10.7301	10.6729	10.8174	11.0185	10.9458	10.9504	11.1825	11.2153	11.135	10.8057	10.9787
ENSMUSG00000000976	210.662	0.00470515	0.0619435	0.473127	0.935103	Heatr6	HEAT repeat containing 6	11	10.201	10.5307	10.6524	10.4513	10.3525	10.5955	10.3458	10.6052	10.2651	10.2659	10.362
ENSMUSG00000001016	284.16	0.000861	0.0613284	0.933293	0.993987	Ilf2	interleukin enhancer binding factor 2	3	10.3947	10.7909	10.5865	10.6183	10.6534	10.5304	10.43	10.7404	10.591	10.3769	10.7666
ENSMUSG00000001017	554.025	-0.0157551	0.0640035	0.134833	0.935103	Chtop	chromatin target of PRMT1	3	10.6062	10.6537	10.7745	10.9369	11.0588	10.7586	11.1622	11.0545	10.955	10.7833	10.8169
ENSMUSG00000001018	130.093	0.00461192	0.0617772	0.589218	0.935847	Snapin	SNAP-associated protein	3	10.5061	10.3768	10.297	10.2804	10.3406	10.4273	10.1625	10.3287	10.2267	10.283	10.5496
ENSMUSG00000001021	3.81676	0.00048468	0.0621189	0.527497	0.935103	S100a3	S100 calcium binding protein A3	3	9.7625	10.0748	9.84058	9.84058	9.84058	9.84058	9.7625	9.7625	9.84058	9.84058	9.84058
ENSMUSG00000001025	14.8149	-0.000882035	0.0621087	0.472947	0.935103	S100a6	S100 calcium binding protein A6 (calcyclin)	3	9.81028	10.1268	9.7928	9.7928	9.99066	9.7928	9.97274	9.81028	10.1351	10.0647	9.94131
ENSMUSG00000001027	109.583	-0.0178296	0.0652059	0.0525785	0.852077	Scn4a	sodium channel, voltage-gated, type IV, alpha	11	10.1537	10.153	10.2594	10.1806	10.2787	10.3761	10.4874	10.3693	10.2676	10.3795	10.294
ENSMUSG00000001029	217.782	0.000427269	0.0611016	0.971379	0.998711	Icam2	intercellular adhesion molecule 2	11	10.5769	10.3922	10.5038	10.5315	10.5679	10.5489	10.3133	10.7908	10.4508	10.4882	10.537
ENSMUSG00000001034	125.205	0.0114557	0.0634367	0.0418754	0.81684	Mapk7	mitogen-activated protein kinase 7	11	10.5628	10.4188	10.4638	10.4148	10.3749	9.9969	10.0661	10.1248	10.2859	10.2407	10.2752
ENSMUSG00000001036	71.7759	-0.00183081	0.0620784	0.554657	0.935103	Epn2	epsin 2	11	9.89591	10.2997	9.97972	10.3256	10.0335	9.89008	9.89591	10.3535	10.4095	10.2846	9.85569
ENSMUSG00000001039	3.3516	-0.000861949	0.0621174	0.377416	0.935103	B9d1	B9 protein domain 1	11	9.80725	9.80725	9.79583	9.93916	9.79583	9.79583	9.96042	9.80725	9.79583	9.79583	10.0005
ENSMUSG00000001052	463.92	-0.00635405	0.0618094	0.507108	0.935103	Sec24b	Sec24 related gene family, member B (S. cerevisiae)	3	10.4705	10.9212	10.7398	10.8212	10.8903	10.7799	10.717	11.108	11.1097	10.5777	10.7106
ENSMUSG00000001053	161.096	-0.00642069	0.0622054	0.345349	0.935103	N4bp3	NEDD4 binding protein 3	11	10.3352	10.1839	10.2348	10.492	10.4806	10.3993	10.7458	10.3162	10.541	10.1778	10.4415
ENSMUSG00000001054	280.542	-0.0022097	0.0619419	0.65168	0.948676	Rmnd5b	required for meiotic nuclear division 5 homolog B	11	10.2406	10.5303	10.6948	10.7479	10.5143	10.4056	10.0945	11.3183	10.5049	10.5665	10.3873
ENSMUSG00000001056	410.205	0.00377875	0.061061	0.752675	0.969546	Nhp2	NHP2 ribonucleoprotein	11	10.5649	10.8551	10.8862	10.8005	10.9297	10.6291	10.6773	10.9793	10.6393	10.7705	10.7288
ENSMUSG00000001062	65.2149	-0.00174479	0.0620473	0.556426	0.935103	Vps9d1	VPS9 domain containing 1	8	10.3073	9.94804	10.0929	10.0935	10.2636	9.96403	10.4368	9.83304	10.3329	10.2395	9.93271
ENSMUSG00000001065	121.524	0.0104479	0.0632909	0.00818464	0.513271	Zfp276	zinc finger protein (C2H2 type) 276	8	10.3718	10.5839	10.4079	10.3798	10.2011	10.2236	9.98877	10.0524	10.0642	10.2488	10.2191
ENSMUSG00000001082	132.624	-0.000324313	0.0618591	0.945556	0.995639	Mfsd10	major facilitator superfamily domain containing 10	5	10.1975	10.2925	10.5389	10.0627	10.3273	10.5137	10.1428	10.6765	10.2759	10.2095	10.3633
ENSMUSG00000001089	12.6644	0.00079084	0.0621016	0.582159	0.935103	Luzp1	leucine zipper protein 1	4	9.86263	10.0169	10.0713	9.74045	9.95134	9.74045	9.86263	9.86263	10.0051	10.0123	9.78743
ENSMUSG00000001095	7.53037	0.000490057	0.0621189	0.518891	0.935103	Slc13a2	solute carrier family 13 (sodium-dependent dicarboxylate transporter), member 2	11	9.74681	10.1847	9.85627	9.85627	9.85627	9.85627	9.74681	9.74681	9.85627	9.85627	9.85627
ENSMUSG00000001098	394.919	-0.00243413	0.0611295	0.825564	0.976392	Kctd10	potassium channel tetramerisation domain containing 10	5	10.6966	10.7416	10.4359	10.9802	10.7737	10.6141	10.8464	10.6032	10.8497	10.6534	10.7465
ENSMUSG00000001100	170.6	0.0126733	0.0633493	0.159461	0.935103	Poldip2	polymerase (DNA-directed), delta interacting protein 2	11	10.4544	10.5307	10.2187	10.6801	10.5331	10.4187	10.3033	10.4049	10.3584	10.4551	10.2992
ENSMUSG00000001105	146.053	-0.00251099	0.0619334	0.646263	0.94825	Ift20	intraflagellar transport 20	11	9.90791	10.5498	10.4255	10.2332	10.4567	10.3028	10.7509	10.2115	10.3439	10.4206	10.3025
ENSMUSG00000001123	591.239	-0.00443152	0.0607258	0.743057	0.968398	Lgals9	lectin, galactose binding, soluble 9	11	10.8488	10.7926	11.016	10.9976	10.8406	11.1189	10.9265	11.2476	10.9537	10.8608	10.8897
ENSMUSG00000001127	418.19	0.00496185	0.0612924	0.665887	0.951577	Araf	Araf proto-oncogene, serine/threonine kinase	X	10.6335	10.8166	10.9153	11.0392	10.6524	10.5728	10.8326	10.7414	10.6242	10.6462	10.8419
ENSMUSG00000001128	355.998	0.315709	0.334078	0.00581965	0.435581	Cfp	complement factor properdin	X	10.7137	10.7655	10.823	10.688	10.5663	10.7274	10.5518	10.5486	10.6159	10.5646	10.529
ENSMUSG00000001134	22.7914	-0.00224665	0.0621019	0.430431	0.935103	Uxt	ubiquitously expressed prefoldin like chaperone	X	9.98284	9.86068	9.90444	10.0451	10.0248	10.09	9.92476	10.2409	10.1738	9.8315	9.94655
ENSMUSG00000001138	150.48	0.00063428	0.061998	0.851938	0.982213	Cnnm3	cyclin M3	1	10.0863	10.2365	10.3858	10.5415	10.5151	10.2038	10.18	10.5993	10.1182	9.99546	10.1689
ENSMUSG00000001143	103.947	0.00173066	0.0619566	0.63142	0.945707	Lman2l	lectin, mannose-binding 2-like	1	10.1469	10.5349	10.15	10.2664	10.0756	10.2251	9.99666	10.2223	10.3451	10.2943	10.2197
ENSMUSG00000001150	625.276	0.00358662	0.0618525	0.624758	0.943384	Mcm3ap	minichromosome maintenance complex component 3 associated protein	10	11.6835	10.4539	10.7134	11.0174	10.8018	11.0159	10.5001	11.0471	10.8633	11.0917	10.9446
ENSMUSG00000001151	491.938	0.00652707	0.0622452	0.331768	0.935103	Pcnt	pericentrin (kendrin)	10	10.3218	11.2325	10.832	10.8075	10.8973	11.1644	11.2637	10.4188	10.5757	10.6833	10.7042
ENSMUSG00000001156	236.153	0.0134061	0.0637052	0.107543	0.935103	Mxd1	MAX dimerization protein 1	6	10.8214	10.5171	10.4151	10.6565	10.6763	10.2561	10.2983	10.3391	10.4735	10.5094	10.4711
ENSMUSG00000001157	173.21	0.0308173	0.0722875	0.0264938	0.738787	Gmcl1	germ cell-less, spermatogenesis associated 1	6	10.4815	10.5298	10.5027	10.5368	10.4464	10.4659	10.4225	10.2851	10.2213	10.4349	10.4001
ENSMUSG00000001158	223.378	0.00205721	0.0616577	0.795696	0.974101	Snrnp27	small nuclear ribonucleoprotein 27 (U4/U6.U5)	6	10.4973	10.8242	10.6584	10.3508	10.5043	10.4678	10.5456	10.2136	10.5638	10.387	10.7093
ENSMUSG00000001166	38.7099	-0.0160363	0.0649008	0.0168509	0.646911	Oas1c	2'-5' oligoadenylate synthetase 1C	5	10.0065	10.0172	9.97061	9.90566	9.96334	10.1378	10.0581	10.1696	10.0852	10.2132	10.1641
ENSMUSG00000001173	39.3417	-0.00217259	0.0620937	0.426102	0.935103	Ocrl	OCRL, inositol polyphosphate-5-phosphatase	X	9.9105	10.1774	9.91915	9.81899	9.89487	10.025	9.98712	10.0018	10.2036	10.28	9.99288
ENSMUSG00000001175	4470.44	0.0103797	0.0609788	0.663798	0.951457	Calm1	calmodulin 1	12	12.4965	12.7574	12.1723	12.8291	12.6491	12.456	12.5793	12.2828	12.7973	12.2407	12.5585
ENSMUSG00000001211	880.766	-0.017222	0.0641118	0.190337	0.935103	Agpat3	1-acylglycerol-3-phosphate O-acyltransferase 3	10	10.9717	11.0105	10.8774	11.2298	11.1602	11.2563	11.4676	11.1601	11.4172	10.9179	11.2086
ENSMUSG00000001227	62.5224	-0.00196721	0.0620358	0.564673	0.935103	Sema6b	sema domain, transmembrane domain (TM), and cytoplasmic domain, (semaphorin) 6B	17	9.86346	10.1494	10.1933	10.1986	10.0376	10.213	10.08	10.437	10.1257	9.97054	10.1885
ENSMUSG00000001228	139.422	0.000507244	0.0616131	0.971927	0.998764	Uhrf1	ubiquitin-like, containing PHD and RING finger domains, 1	17	10.343	10.6439	10.427	10.3021	10.3451	10.2835	10.1435	10.3589	10.4328	10.5386	10.2773
ENSMUSG00000001229	320.646	-0.0128733	0.0627808	0.295625	0.935103	Dpp9	dipeptidylpeptidase 9	17	10.6329	10.454	10.8065	10.6186	10.5864	10.5111	10.8901	10.5961	10.6044	10.7086	10.6672
ENSMUSG00000001247	4.0737	0.000748154	0.0621094	0.652453	0.948676	Lsr	lipolysis stimulated lipoprotein receptor	7	9.8316	9.90435	9.77148	9.77148	9.77148	10.0259	9.8316	9.8316	9.81504	9.87315	9.91999
ENSMUSG00000001248	300.546	0.0102987	0.0631254	0.0744318	0.924167	Gramd1a	GRAM domain containing 1A	7	11.2916	10.2842	10.4554	10.4498	10.5425	10.9495	10.3592	10.3012	10.3854	10.676	10.4546
ENSMUSG00000001270	5.14571	-0.00304868	0.0622078	0.0541519	0.856126	Ckb	creatine kinase, brain	12	9.81182	9.81182	9.8642	9.79126	9.86437	9.8705	9.81182	10.0531	10.0132	9.86316	9.83824
ENSMUSG00000001280	1874.21	0.0111028	0.062993	0.188053	0.935103	Sp1	trans-acting transcription factor 1	15	11.3792	12.7642	11.5722	11.358	11.8425	11.8223	11.1714	11.3484	11.8444	11.4996	11.7215
ENSMUSG00000001281	481.835	-0.0252219	0.0695709	0.00118515	0.17392	Itgb7	integrin beta 7	15	10.4451	10.3975	10.3632	10.8727	10.8305	10.344	11.4518	10.7915	10.968	11.0764	10.9456
ENSMUSG00000001285	115.238	0.00429171	0.0618388	0.609917	0.939563	Myg1	melanocyte proliferating gene 1	15	10.3291	10.2969	10.4834	10.2902	10.4457	10.031	10.3138	10.2654	10.3146	10.2346	10.3096
ENSMUSG00000001289	2507.95	0.0225912	0.0632564	0.313379	0.935103	Pfdn5	prefoldin 5	15	12.0468	11.9159	11.9924	12.2693	12.0755	12.1305	12.2008	11.9478	11.8785	11.8723	11.9763
ENSMUSG00000001300	3.52596	0.000567102	0.0621137	0.41568	0.935103	Efnb2	ephrin B2	8	9.77285	10.0634	9.83024	9.83024	9.88993	9.83024	9.77285	9.77285	9.83024	9.83024	9.87722
ENSMUSG00000001305	165.97	0.0204868	0.0666407	0.0180476	0.665625	Rrp15	ribosomal RNA processing 15 homolog	1	10.6101	10.5962	10.2698	10.5343	10.3872	10.5382	10.2573	10.13	10.4295	10.3292	10.3007
ENSMUSG00000001313	3.43041	-0.00108601	0.0621272	0.305321	0.935103	Rnd2	Rho family GTPase 2	11	9.76803	9.76803	9.83505	9.83505	9.83505	9.83505	9.76803	10.061	9.87861	9.83505	9.83505
ENSMUSG00000001323	74.2947	-0.00403195	0.0622007	0.216601	0.935103	Srr	serine racemase	11	9.9525	10.0533	10.2712	10.177	10.1545	10.012	9.87064	10.75	10.2273	10.0088	10.2454
ENSMUSG00000001348	862.07	-0.00417085	0.0610642	0.734858	0.967621	Acp5	acid phosphatase 5, tartrate resistant	9	11.2876	10.7836	11.0601	11.1536	11.1788	11.2125	10.969	11.4846	11.1078	11.0355	11.1701
ENSMUSG00000001366	227.237	-0.0142509	0.064056	0.0654797	0.906843	Fbxo9	f-box protein 9	9	10.4595	10.1369	10.5769	10.2364	10.5244	10.5366	10.8272	10.6436	10.7079	10.4196	10.6159
ENSMUSG00000001376	226.973	0.00167543	0.0618934	0.758515	0.969546	Vps50	VPS50 EARP/GARPII complex subunit	6	10.234	10.5957	10.7659	10.5951	10.4632	10.4216	11.0336	10.0896	10.4204	10.4957	10.2554
ENSMUSG00000001380	360.625	-0.00304409	0.0617563	0.668479	0.952196	Hars	histidyl-tRNA synthetase	18	10.5576	10.6456	10.6003	10.6877	10.6621	10.8705	11.2874	10.2475	10.5935	10.5976	10.78
ENSMUSG00000001383	894.925	-0.0061667	0.0612003	0.607377	0.939563	Zmat2	zinc finger, matrin type 2	18	10.8795	11.4741	11.2544	11.1241	11.1366	11.1295	11.0274	11.4025	11.4514	11.0022	11.2729
ENSMUSG00000001403	35.8224	-0.000315513	0.0621018	0.757026	0.969546	Ube2c	ubiquitin-conjugating enzyme E2C	2	9.86626	10.3466	10.0061	9.73682	10.0001	9.80153	9.86626	9.86626	10.2442	10.246	9.86967
ENSMUSG00000001415	363.416	-0.00120656	0.0610834	0.913554	0.991262	Smg5	Smg-5 homolog, nonsense mediated mRNA decay factor (C. elegans)	3	10.7225	10.5378	10.6169	10.7491	10.8377	10.665	10.5416	10.9501	10.7033	10.5024	10.7416
ENSMUSG00000001416	890.073	-0.264254	0.301482	0.00697569	0.483068	Cct3	chaperonin containing Tcp1, subunit 3 (gamma)	3	11.0073	11.058	11.0689	11.1933	11.1505	11.0339	11.2865	11.3693	11.446	11.2492	11.1199
ENSMUSG00000001418	357.642	0.00286358	0.0617618	0.693449	0.958777	Glmp	glycosylated lysosomal membrane protein	3	10.4724	10.6113	10.7937	10.8379	10.7861	10.4195	10.4783	10.8483	10.1208	10.5842	10.6758
ENSMUSG00000001419	1188.56	-0.0220609	0.0665042	0.0938049	0.935103	Mef2d	myocyte enhancer factor 2D	3	10.8742	11.3224	10.915	11.3229	11.1262	11.3632	11.5957	11.2561	11.3117	11.4805	11.3151
ENSMUSG00000001424	1451.71	-0.000842494	0.061476	0.985595	0.999188	Snd1	staphylococcal nuclease and tudor domain containing 1	6	11.1343	11.4238	12.1949	11.7273	11.2356	11.1057	11.4753	11.8956	11.3022	11.631	11.179
ENSMUSG00000001436	158.684	0.00111552	0.0619281	0.821633	0.976392	Slc19a1	solute carrier family 19 (folate transporter), member 1	10	10.4046	10.6265	10.1276	10.5078	10.311	10.251	9.9609	10.404	10.5821	10.5037	10.1599
ENSMUSG00000001440	2075.9	0.0255321	0.0666544	0.166558	0.935103	Kpnb1	karyopherin (importin) beta 1	11	12.3064	11.9394	11.8574	11.8801	11.8615	11.8552	11.4355	11.7629	11.9658	11.8062	11.8012
ENSMUSG00000001441	315.325	-0.00559142	0.0618521	0.525088	0.935103	Npepps	aminopeptidase puromycin sensitive	11	10.9448	10.2263	10.6766	10.4538	10.6195	10.6431	10.8368	10.5516	10.7026	10.595	10.7887
ENSMUSG00000001444	35.1773	-0.000265365	0.0620745	0.89206	0.989436	Tbx21	T-box 21	11	9.86165	10.1236	9.74143	9.74143	10.2625	10.1149	10.1815	9.86165	10.0809	10.0977	10.0109
ENSMUSG00000001445	241.017	-0.00391351	0.0611684	0.721725	0.964568	Mrpl10	mitochondrial ribosomal protein L10	11	10.5153	10.4347	10.563	10.6124	10.4752	10.6207	10.4495	10.798	10.6306	10.4497	10.494
ENSMUSG00000001467	163.074	0.00656466	0.0623081	0.294325	0.935103	Cyp51	cytochrome P450, family 51	5	10.1948	10.5919	10.1812	10.5301	10.6261	10.5273	10.5826	10.2	10.1881	10.445	10.2485
ENSMUSG00000001472	1352.33	-0.00350548	0.0614928	0.711641	0.963116	Tcf25	transcription factor 25 (basic helix-loop-helix)	8	11.8112	10.9214	11.4291	11.2929	11.4237	11.5074	11.041	11.9356	11.7205	11.1939	11.4235
ENSMUSG00000001482	182.919	0.0265813	0.0694519	0.0346913	0.782252	Def8	differentially expressed in FDCP 8	8	10.3956	10.3065	10.2757	10.5023	10.3495	10.5035	10.2542	10.3558	10.2423	10.2221	10.2008
ENSMUSG00000001506	1.95996	0.000475157	0.0621187	0.542139	0.935103	Col1a1	collagen, type I, alpha 1	11	9.77354	9.99755	9.82954	9.82954	9.82954	9.82954	9.77354	9.77354	9.82954	9.82954	9.82954
ENSMUSG00000001507	75.5668	0.000825704	0.0621147	0.379732	0.935103	Itga3	integrin alpha 3	11	10.994	9.67971	10.1252	9.99096	9.92338	10.0354	9.67971	9.67971	9.96694	9.92338	10.0927
ENSMUSG00000001517	72.7669	-0.00225498	0.0621234	0.215139	0.935103	Foxm1	forkhead box M1	6	9.96203	9.96203	10.4545	10.034	10.1256	9.68681	10.1416	10.2355	10.1002	10.2971	9.82885
ENSMUSG00000001518	85.2412	0.00417298	0.0620821	0.452564	0.935103	Itfg2	integrin alpha FG-GAP repeat containing 2	6	10.1773	10.3164	9.89205	10.4774	10.1828	10.2294	10.2471	10.024	10.1674	10.1916	10.1977
ENSMUSG00000001521	76.061	0.00520402	0.0623457	0.142032	0.935103	Tulp3	tubby-like protein 3	6	9.95226	10.2517	9.96256	10.0688	10.1566	10.6102	10.0064	10.1877	9.92596	9.90304	10.0696
ENSMUSG00000001524	40.3454	-8.99453e-05	0.0620457	0.941158	0.995639	Gtf2h4	general transcription factor II H, polypeptide 4	17	9.98829	10.3638	9.9436	10.1005	10.0959	9.82632	9.82251	10.058	10.0971	10.259	10.0845
ENSMUSG00000001525	3681.91	0.00270046	0.0578182	0.895107	0.989676	Tubb5	tubulin, beta 5 class I	17	12.299	12.6038	12.2653	12.3448	12.3689	12.3076	12.33	12.1986	12.5991	12.2826	12.3365
ENSMUSG00000001542	619.531	0.00342392	0.0615911	0.700463	0.959965	Ell2	elongation factor for RNA polymerase II 2	13	11.1264	10.5983	11.1809	10.7581	10.8939	11.3547	11.0718	11.1165	10.6667	11.0357	10.9578
ENSMUSG00000001552	10.0325	-0.00120915	0.0621144	0.253829	0.935103	Jup	junction plakoglobin	11	9.75584	9.75584	10.0156	9.84724	9.90694	9.84724	10.1019	10.0343	9.84724	9.991	9.92861
ENSMUSG00000001569	691.119	-0.0124322	0.0636406	0.0556847	0.862107	Nom1	nucleolar protein with MIF4G domain 1	5	11.1514	10.733	10.4417	11.0419	10.4687	10.6609	10.5981	11.2177	11.7766	10.6363	11.4491
ENSMUSG00000001576	235.465	-0.0155496	0.0630419	0.293769	0.935103	Ergic1	endoplasmic reticulum-golgi intermediate compartment (ERGIC) 1	17	10.398	10.5597	10.4125	10.4761	10.4982	10.3456	10.4458	10.5243	10.5039	10.6322	10.5051
ENSMUSG00000001588	989.817	-0.00289324	0.0591516	0.875118	0.98732	Acap1	ArfGAP with coiled-coil, ankyrin repeat and PH domains 1	11	11.0635	11.3908	11.163	11.1969	11.251	11.1775	11.241	11.1646	11.1371	11.4056	11.1739
ENSMUSG00000001604	9.22902	0.00580873	0.0625134	0.000581658	0.101773	Tcea3	transcription elongation factor A (SII), 3	4	10.1209	9.81116	9.98014	10.0055	9.98524	9.9213	9.86534	9.81116	9.79192	9.79192	9.83891
ENSMUSG00000001627	371.114	-0.00371916	0.0615268	0.671672	0.95294	Ifrd1	interferon-related developmental regulator 1	12	10.4676	10.4683	10.7773	10.6701	10.625	10.6194	10.7646	10.6632	10.3748	10.4299	10.64
ENSMUSG00000001632	462.41	0.00721561	0.0620676	0.426185	0.935103	Brpf1	bromodomain and PHD finger containing, 1	6	10.7322	10.973	11.0899	10.5097	10.6533	11.0365	10.4811	10.951	10.8446	10.8098	10.5463
ENSMUSG00000001642	665.545	0.00928594	0.0610613	0.566491	0.935103	Akr1b3	aldo-keto reductase family 1, member B3 (aldose reductase)	6	11.1488	10.9726	11.0399	11.0502	10.9099	11.0349	11.1453	10.7266	10.891	11.031	11.0314
ENSMUSG00000001665	3.80284	0.000190867	0.0621084	0.887452	0.988226	Gstt3	glutathione S-transferase, theta 3	10	9.83961	9.83961	9.76347	9.97702	9.90343	9.76347	9.83961	9.83961	9.94299	9.76347	9.76347
ENSMUSG00000001666	120.055	0.0179812	0.065301	0.0580739	0.872981	Ddt	D-dopachrome tautomerase	10	10.5357	10.4218	10.2778	10.2539	10.4612	10.4142	10.2067	10.1575	10.2212	10.3194	10.3654
ENSMUSG00000001674	403.819	-0.00295339	0.0616359	0.715587	0.963126	Ddx18	DEAD box helicase 18	1	10.5999	10.7099	10.6928	10.4702	11.1787	10.5691	11.0619	10.5637	10.8748	10.6635	10.6878
ENSMUSG00000001687	1840.46	-0.0117688	0.0610761	0.488326	0.935103	Ubl3	ubiquitin-like 3	5	11.7142	11.4971	11.3607	11.647	11.8808	11.7432	11.7153	11.7917	11.5731	11.9357	11.6166
ENSMUSG00000001700	519.342	-0.0170561	0.064025	0.193061	0.935103	Gramd3	GRAM domain containing 3	18	10.5246	10.795	10.7932	10.7586	10.7913	10.8104	11.0087	10.8427	10.8683	10.7816	10.7458
ENSMUSG00000001707	133.434	0.00574126	0.0623365	0.232475	0.935103	Eef1e1	eukaryotic translation elongation factor 1 epsilon 1	13	9.96395	10.7632	10.5644	10.4559	10.1775	10.2176	10.359	10.118	10.2864	10.3616	10.044
ENSMUSG00000001729	539.847	0.00383283	0.0609093	0.748373	0.969261	Akt1	thymoma viral proto-oncogene 1	12	10.9705	10.8351	11.2426	10.7614	10.6964	10.8898	10.9052	10.8525	10.8814	10.7982	10.9661
ENSMUSG00000001739	0.974446	-0.000536724	0.0621192	0.58055	0.935103	Cldn15	claudin 15	5	9.78179	9.78179	9.82129	9.82129	9.82129	9.82129	9.78179	9.93982	9.82129	9.82129	9.82129
ENSMUSG00000001741	2857.48	0.00478606	0.0554348	0.838415	0.978492	Il16	interleukin 16	7	12.0383	12.2313	12.0897	12.1262	11.9233	12.0802	12.0159	12.0205	12.138	12.0857	12.0924
ENSMUSG00000001750	165.462	-0.00160273	0.0619718	0.723029	0.96487	Tcirg1	T cell, immune regulator 1, ATPase, H+ transporting, lysosomal V0 protein A3	19	10.7635	10.0211	10.03	10.2088	10.1553	10.6263	10.5434	10.077	10.3967	10.5856	10.456
ENSMUSG00000001751	306.139	-0.000976063	0.061739	0.885463	0.98809	Naglu	alpha-N-acetylglucosaminidase (Sanfilippo disease IIIB)	11	10.7643	10.6152	10.8867	10.3854	10.4437	10.6045	10.1073	10.9623	10.6308	10.5548	10.7798
ENSMUSG00000001755	89.7564	-0.00341712	0.0618513	0.615563	0.941178	Coasy	Coenzyme A synthase	11	10.1162	10.4354	10.2653	10.0731	10.1149	10.23	10.1979	10.1802	10.3288	10.2168	10.3982
ENSMUSG00000001763	1.44418	0.000470589	0.0621186	0.551649	0.935103	Tspan33	tetraspanin 33	6	9.7775	9.96984	9.82558	9.82558	9.82558	9.82558	9.7775	9.7775	9.82558	9.82558	9.82558
ENSMUSG00000001767	614.128	-0.0161757	0.0637432	0.220107	0.935103	Crnkl1	crooked neck pre-mRNA splicing factor 1	2	11.0468	10.8348	10.934	11.0681	10.8453	10.7546	11.0482	10.9517	10.9163	11.3718	10.9025
ENSMUSG00000001768	2.31554	-0.000297718	0.0621116	0.685819	0.956271	Rin2	Ras and Rab interactor 2	2	9.818	9.89075	9.78508	9.78508	9.78508	9.87658	9.818	9.818	9.84669	9.78508	9.98971
ENSMUSG00000001774	458.357	0.00896392	0.0625856	0.245926	0.935103	Chordc1	cysteine and histidine-rich domain (CHORD)-containing, zinc-binding protein 1	9	11.4346	10.5772	10.5198	10.7493	10.8046	11.0517	10.5858	10.5389	10.6007	10.8742	10.8885
ENSMUSG00000001783	1445.59	0.0316123	0.0680819	0.222618	0.935103	Rtcb	RNA 2',3'-cyclic phosphate and 5'-OH ligase	10	11.7175	11.577	11.4953	11.4452	11.6012	11.505	11.4544	11.2936	11.4464	11.5494	11.532
ENSMUSG00000001785	212.947	-0.0008468	0.0617789	0.885444	0.98809	Pwp1	PWP1 homolog, endonuclein	10	10.0599	10.7871	10.5758	10.502	10.3735	10.3926	10.7317	10.2911	10.3596	10.6365	10.4324
ENSMUSG00000001786	247.952	-0.000731414	0.0619174	0.87812	0.98732	Fbxo7	F-box protein 7	10	10.7946	10.0072	10.2008	10.403	10.3613	10.8956	10.3164	10.7885	10.7906	10.3858	10.2997
ENSMUSG00000001794	572.772	0.0135962	0.0627443	0.310062	0.935103	Capns1	calpain, small subunit 1	7	11.1425	11.1067	10.8511	11.092	10.7893	10.8582	10.7287	10.7227	10.9315	10.9644	10.9896
ENSMUSG00000001829	170.874	-0.00793218	0.0625718	0.151602	0.935103	Clpb	ClpB caseinolytic peptidase B	7	9.91784	10.3035	10.2441	10.5177	10.5033	10.3496	10.6729	10.7435	10.423	10.4225	10.406
ENSMUSG00000001833	1190.58	-0.0207918	0.063975	0.274626	0.935103	Septin7	septin 7	9	11.1549	11.4314	11.4049	11.3651	11.4222	11.3119	11.3968	11.6036	11.2171	11.5991	11.4564
ENSMUSG00000001844	90.2122	-0.00271627	0.0618841	0.658802	0.950008	Zdhhc4	zinc finger, DHHC domain containing 4	5	10.2882	10.281	10.3213	10.0024	10.3021	10.1414	10.3755	10.0139	10.2589	10.3957	10.2558
ENSMUSG00000001847	1269.25	0.00709233	0.0609342	0.643322	0.947634	Rac1	Rac family small GTPase 1	5	11.3884	11.6878	11.3098	11.3984	11.4569	11.2559	11.0446	11.4366	11.5868	11.4589	11.2588
ENSMUSG00000001855	683.585	0.00595389	0.0616471	0.567829	0.935103	Nup214	nucleoporin 214	2	10.7206	11.415	11.106	10.879	10.7262	11.2417	10.8612	10.9699	11.1552	10.9216	10.912
ENSMUSG00000001891	159.813	0.00777576	0.062274	0.351376	0.935103	Ugp2	UDP-glucose pyrophosphorylase 2	11	10.6504	10.2906	10.4768	10.3429	10.4165	10.5161	10.1305	10.5557	10.4283	10.2565	10.4104
ENSMUSG00000001901	2.95141	5.4285e-05	0.0621074	0.971118	0.998672	Kcnh6	potassium voltage-gated channel, subfamily H (eag-related), member 6	11	9.83398	9.83398	9.76911	9.76911	9.85353	9.96309	9.83398	9.83398	9.76911	9.76911	9.94479
ENSMUSG00000001909	296.833	0.00544344	0.0618281	0.467373	0.935103	Trmt1	tRNA methyltransferase 1	8	10.8971	10.517	10.8083	10.2554	10.6461	10.6863	10.4832	10.529	10.7126	10.5938	10.5434
ENSMUSG00000001910	849.725	-0.0104419	0.0624323	0.322228	0.935103	Nacc1	nucleus accumbens associated 1, BEN and BTB (POZ) domain containing	8	11.5158	10.6636	11.2949	10.9005	11.0785	10.8923	11.169	11.2242	11.2638	11.3393	11.2327
ENSMUSG00000001911	12.2412	0.00284575	0.0621804	0.13055	0.935103	Nfix	nuclear factor I/X	8	9.91674	10.1151	9.97109	9.9126	10.0702	9.84851	9.83381	9.83381	9.76927	9.91303	9.98943
ENSMUSG00000001918	151.049	0.0139186	0.0635933	0.168399	0.935103	Slc1a5	solute carrier family 1 (neutral amino acid transporter), member 5	7	10.5423	10.4161	10.4498	10.4096	10.2227	10.4607	10.3226	10.2103	10.4026	10.2519	10.4124
ENSMUSG00000001924	1757.74	0.0685893	0.128262	0.00726873	0.487259	Uba1	ubiquitin-like modifier activating enzyme 1	X	12.0537	11.5971	11.6608	12.1059	11.7547	11.6797	11.5768	11.4574	11.4134	11.5168	11.5673
ENSMUSG00000001930	1.41784	-0.000931676	0.0621204	0.322946	0.935103	Vwf	Von Willebrand factor	6	9.79199	9.79199	9.81109	9.85888	9.81109	9.81109	9.79199	9.95856	9.85466	9.81109	9.87753
ENSMUSG00000001942	192.876	0.000873327	0.0619947	0.830409	0.977617	Siae	sialic acid acetylesterase	9	9.90148	10.7013	10.6184	10.4901	10.2871	10.3322	10.8152	10.0985	10.2494	10.3813	10.2954
ENSMUSG00000001946	1.17601	-0.00125455	0.0621327	0.297851	0.935103	Esam	endothelial cell-specific adhesion molecule	9	9.78692	9.78692	9.81616	9.81616	9.81616	9.81616	9.78692	9.94496	9.81616	9.88806	9.81616
ENSMUSG00000001948	1.1612	0.000364269	0.0621116	0.756266	0.969546	Spa17	sperm autoantigenic protein 17	9	9.81822	9.81822	9.78486	9.78486	9.937	9.78486	9.81822	9.81822	9.78486	9.78486	9.86623
ENSMUSG00000001962	354.774	-0.00548936	0.0615216	0.60039	0.938271	Fam50a	family with sequence similarity 50, member A	X	10.4881	10.7162	10.5841	10.8622	10.584	10.6436	10.9423	10.5217	10.5284	10.7357	10.7315
ENSMUSG00000001964	203.278	0.00103682	0.0619108	0.847188	0.980617	Emd	emerin	X	9.98464	10.8491	10.2922	10.3184	10.5507	10.473	10.2163	10.6276	10.5224	10.3911	10.3883
ENSMUSG00000001983	88.5857	-0.00176978	0.0619367	0.711771	0.963116	Taco1	translational activator of mitochondrially encoded cytochrome c oxidase I	11	9.97973	10.2625	10.2043	10.3951	10.2755	10.117	10.0897	10.551	10.1179	10.2793	10.1561
ENSMUSG00000001995	250.316	-0.0031124	0.061519	0.719067	0.963737	Sipa1l2	signal-induced proliferation-associated 1 like 2	8	10.3156	10.6407	10.3472	10.4689	10.5279	10.5342	10.6706	10.334	10.5262	10.4623	10.5651
ENSMUSG00000001998	172.969	-0.00148265	0.061253	0.884743	0.988057	Ap4e1	adaptor-related protein complex AP-4, epsilon 1	2	10.452	10.2632	10.5104	10.6068	10.3359	10.3584	10.5524	10.4601	10.4268	10.411	10.3743
ENSMUSG00000001999	90.6432	-0.000251285	0.0619483	0.951244	0.996304	Blvra	biliverdin reductase A	2	10.2056	10.3835	10.2257	10.2565	10.2007	10.2413	10.5652	9.76455	10.2413	10.1826	10.2599
ENSMUSG00000002006	0.738906	0.000522533	0.0621156	0.603241	0.93892	Pdzd4	PDZ domain containing 4	X	9.81414	9.81414	9.78894	9.78894	9.78894	9.91832	9.81414	9.81414	9.78894	9.78894	9.83593
ENSMUSG00000002007	410.769	-0.00167406	0.0616763	0.761101	0.969546	Srpk3	serine/arginine-rich protein specific kinase 3	X	10.2523	10.7347	10.842	10.8573	10.7132	10.7573	10.8455	11.01	10.5257	10.644	10.6349
ENSMUSG00000002010	436.673	0.00695448	0.0617385	0.518813	0.935103	Idh3g	isocitrate dehydrogenase 3 (NAD+), gamma	X	10.8628	10.8938	10.7072	11.0403	10.7409	10.8014	10.8638	10.5791	10.8449	10.4977	10.9667
ENSMUSG00000002012	0.835723	0.000741146	0.0621168	0.481638	0.935103	Pnck	pregnancy upregulated non-ubiquitously expressed CaM kinase	X	9.91473	9.79748	9.84772	9.8056	9.8056	9.87031	9.79748	9.79748	9.8056	9.84712	9.8056
ENSMUSG00000002014	370.394	0.00557046	0.0616343	0.585594	0.935103	Ssr4	signal sequence receptor, delta	X	11.0948	10.3992	10.6138	10.7568	10.8014	10.7031	10.6073	10.7349	10.7841	10.724	10.5801
ENSMUSG00000002015	549.963	0.0111858	0.0616181	0.452927	0.935103	Bcap31	B cell receptor associated protein 31	X	10.9131	11.0514	10.8821	11.0396	10.8188	10.8842	11.0058	10.6253	10.889	10.8585	10.92
ENSMUSG00000002017	132.192	-0.00472406	0.0620948	0.408045	0.935103	Fam98a	family with sequence similarity 98, member A	17	10.2367	10.2199	10.1686	10.5104	10.1858	10.2672	10.5952	10.0986	10.36	10.1227	10.3984
ENSMUSG00000002028	2153.58	0.00298951	0.0615636	0.742402	0.968398	Kmt2a	lysine (K)-specific methyltransferase 2A	9	11.9425	12.0896	11.6412	12.3096	11.7043	11.7829	12.3826	10.9283	11.7884	12.2109	11.4128
ENSMUSG00000002031	133.635	-0.00438715	0.0621456	0.309668	0.935103	Ift46	intraflagellar transport 46	9	10.0825	10.1382	10.54	10.1071	10.1504	10.521	10.4631	10.5115	10.1251	10.4699	10.1782
ENSMUSG00000002033	5.63876	-0.000566385	0.0621199	0.534439	0.935103	Cd3g	CD3 antigen, gamma polypeptide	9	9.73485	9.73485	9.86823	9.86823	9.86823	9.86823	9.97076	10.0325	9.86823	9.86823	9.86823
ENSMUSG00000002043	73.3127	-0.00957034	0.0625998	0.236027	0.935103	Trappc6a	trafficking protein particle complex 6A	7	10.0166	10.1858	10.2132	10.176	10.1789	10.2534	10.3546	10.2629	10.223	10.1794	10.2112
ENSMUSG00000002052	1145.63	-0.0216891	0.0653061	0.17449	0.935103	Supt6	SPT6, histone chaperone and transcription elongation factor	11	10.9841	11.3197	11.5023	11.3814	11.3385	11.3042	11.6838	11.5467	11.2579	11.4203	11.4807
ENSMUSG00000002055	21.1069	-0.00491924	0.0623596	0.0240479	0.726895	Spag5	sperm associated antigen 5	11	9.8772	9.8772	9.88339	10	9.91454	9.81738	10.2016	9.8772	10.0869	10.0599	9.94604
ENSMUSG00000002058	194.07	0.00726809	0.0615424	0.538185	0.935103	Unc119	unc-119 lipid binding chaperone	11	10.3993	10.4762	10.4663	10.467	10.416	10.6701	10.4435	10.5388	10.3087	10.4686	10.4544
ENSMUSG00000002064	179.516	-0.00494028	0.0602164	0.751171	0.969546	Sdf2	stromal cell derived factor 2	11	10.4174	10.4817	10.4915	10.3518	10.4384	10.4903	10.4876	10.4235	10.398	10.4956	10.5023
ENSMUSG00000002068	32.9988	-0.00182524	0.0620855	0.541973	0.935103	Ccne1	cyclin E1	7	10.1926	9.80553	10.0677	9.87029	10.0442	10.0287	10.3754	9.73279	10.001	10.0511	10.123
ENSMUSG00000002083	29.6619	0.000659285	0.0620885	0.696114	0.959335	Bbc3	BCL2 binding component 3	7	9.80683	10.4279	9.79625	10.0904	9.98956	9.94794	9.92795	9.80683	10.17	10.0078	9.94476
ENSMUSG00000002102	696.172	-0.0190681	0.0640945	0.236456	0.935103	Psmc3	proteasome (prosome, macropain) 26S subunit, ATPase 3	2	11.0544	10.9115	10.8332	11.059	10.9419	11.1878	11.0859	11.1457	11.2937	11.0394	10.9907
ENSMUSG00000002103	63.3208	-0.000171256	0.0621004	0.822398	0.976392	Acp2	acid phosphatase 2, lysosomal	2	9.76185	9.76185	9.97437	10.1948	10.1144	10.0831	9.76185	10.8697	10.026	9.99086	9.88822
ENSMUSG00000002104	0.730872	0.000327301	0.0621112	0.777843	0.971076	Rapsn	receptor-associated protein of the synapse	2	9.8173	9.8173	9.8279	9.78578	9.78578	9.89784	9.8173	9.8173	9.78578	9.78578	9.85222
ENSMUSG00000002105	59.5058	0.000609861	0.0620668	0.773628	0.970758	Slc39a13	solute carrier family 39 (metal ion transporter), member 13	2	9.78061	10.0929	9.88203	10.4498	10.1175	10.2849	10.3112	10.3125	10.0267	10.0257	10.0837
ENSMUSG00000002107	2195.55	0.0125789	0.0624265	0.318	0.935103	Celf2	CUGBP, Elav-like family member 2	2	12.3612	11.677	12.2223	11.8563	12.0421	11.4957	11.5717	11.8992	11.8431	11.8939	11.7875
ENSMUSG00000002108	14.5735	0.00215235	0.0621443	0.347807	0.935103	Nr1h3	nuclear receptor subfamily 1, group H, member 3	2	9.90128	9.90128	10.0957	9.92062	9.82841	9.99429	9.90128	9.90128	9.91057	9.7018	9.85756
ENSMUSG00000002109	76.642	0.00737942	0.062579	0.13347	0.935103	Ddb2	damage specific DNA binding protein 2	2	10.6445	9.98302	10.1074	10.3209	10.1671	10.2706	10.013	10.1215	10.2523	10.0455	10.1696
ENSMUSG00000002111	629.523	-0.0281638	0.0708829	0.016739	0.646454	Spi1	spleen focus forming virus (SFFV) proviral integration oncogene	2	11.189	10.6545	10.8063	10.7305	10.8748	10.7318	11.1766	10.8586	11.4398	11.2498	10.9549
ENSMUSG00000002129	1346.3	0.0299835	0.0689574	0.1405	0.935103	Sf3a1	splicing factor 3a, subunit 1	11	11.635	11.4677	11.3577	11.3141	11.6269	11.7308	11.3163	11.417	11.3818	11.4754	11.3263
ENSMUSG00000002147	1094.93	0.008198	0.0611918	0.573808	0.935103	Stat6	signal transducer and activator of transcription 6	10	11.4427	11.3979	11.3232	11.4343	11.4378	11.0705	10.9638	11.4547	11.3807	11.4258	11.131
ENSMUSG00000002204	1420.26	0.0131439	0.0625398	0.337599	0.935103	Napsa	napsin A aspartic peptidase	7	11.7649	11.6451	11.5263	11.4267	11.6388	11.3042	11.5025	11.0289	11.4744	11.6853	11.3418
ENSMUSG00000002205	253.582	0.0131482	0.0638496	0.0501375	0.847197	Vrk3	vaccinia related kinase 3	7	11.0387	10.5249	10.408	10.9351	10.471	10.4863	10.4449	10.1147	10.3505	10.5323	10.5321
ENSMUSG00000002210	102.341	-0.00630392	0.0623164	0.284048	0.935103	Smg9	smg-9 homolog, nonsense mediated mRNA decay factor (C. elegans)	7	10.4572	10.0489	10.1726	10.1515	10.1976	10.2835	10.0052	10.5353	10.5049	10.2349	10.2866
ENSMUSG00000002221	297.725	-0.0037703	0.0619161	0.594095	0.936825	Paxip1	PAX interacting (with transcription-activation domain) protein 1	5	10.6492	10.7005	10.7589	10.4018	10.4845	10.4846	10.8697	10.1506	10.3051	10.8099	10.9027
ENSMUSG00000002222	729.189	0.00863695	0.0626378	0.181896	0.935103	Rmnd5a	required for meiotic nuclear division 5 homolog A	6	11.9037	10.7834	10.9919	10.8588	10.9547	10.9666	10.5429	10.6694	10.9082	11.192	10.9518
ENSMUSG00000002227	238.345	-0.0154507	0.064689	0.0154064	0.636639	Mov10	Mov10 RISC complex RNA helicase	3	10.0326	10.4346	10.2462	10.4158	10.4745	10.2988	10.6068	10.7856	10.6911	10.4066	10.7213
ENSMUSG00000002249	1.0818	-0.000959527	0.0621268	0.290307	0.935103	Tead3	TEA domain family member 3	17	9.81613	9.81613	9.78695	9.78695	9.78695	9.78695	9.81613	9.81613	9.83052	9.94766	9.78695
ENSMUSG00000002250	93.0854	-0.00472386	0.0622603	0.243645	0.935103	Ppard	peroxisome proliferator activator receptor delta	17	9.97865	10.2692	10.1341	10.0608	10.0493	10.0423	10.4071	9.97865	10.3293	10.3258	10.1671
ENSMUSG00000002257	686.926	-0.00353733	0.0611448	0.757906	0.969546	Def6	differentially expressed in FDCP 6	17	11.3373	10.6472	10.8761	11.1928	11.1141	10.9528	11.2481	10.9547	11.1561	10.9182	11.1176
ENSMUSG00000002265	10.2647	-0.000230896	0.0621076	0.91481	0.991262	Peg3	paternally expressed 3	7	9.69087	10.0115	9.91221	9.91221	9.91221	9.91221	9.98215	9.96432	9.91221	9.91221	9.91221
ENSMUSG00000002274	45.6729	-0.00147115	0.0621118	0.242187	0.935103	Metrn	meteorin, glial cell differentiation regulator	17	9.84032	9.84032	10.1041	10.0897	10.1201	9.88379	10.5941	9.84032	10.1859	9.90652	9.91127
ENSMUSG00000002279	120.032	-0.00890627	0.0624851	0.281429	0.935103	Lmf1	lipase maturation factor 1	17	10.211	10.2583	10.38	10.05	10.4168	10.2975	10.4112	10.3689	10.4091	10.2489	10.3842
ENSMUSG00000002280	143.577	0.00260177	0.0619825	0.604337	0.939443	Ciao3	cytosolic iron-sulfur assembly component 3	17	10.0391	10.4603	10.5545	10.3642	10.218	10.5024	10.2628	10.5072	10.0404	10.0586	10.4832
ENSMUSG00000002297	110.289	-0.00922795	0.0623665	0.345082	0.935103	Dbf4	DBF4 zinc finger	5	10.2316	10.203	10.3238	10.169	10.2786	10.3602	10.4499	10.2574	10.3188	10.1771	10.3709
ENSMUSG00000002307	457.988	0.00355683	0.0614279	0.724944	0.96583	Daxx	Fas death domain-associated protein	17	11.0923	10.4952	10.9631	10.758	10.705	10.9887	10.6424	11.0593	10.9112	10.6609	10.7692
ENSMUSG00000002308	11.3425	0.00218757	0.0621438	0.265151	0.935103	Cd320	CD320 antigen	17	9.99669	9.8656	9.79704	10.0713	9.93978	9.93146	9.8656	9.8656	9.79909	10.0125	9.73748
ENSMUSG00000002319	235.063	0.00155211	0.0618518	0.782602	0.97236	Ipo4	importin 4	14	10.1213	10.6075	10.5195	10.6955	10.2469	10.3056	10.4866	10.4209	10.2296	10.3525	10.5138
ENSMUSG00000002320	284.003	0.000894297	0.0616787	0.905712	0.990764	Tm9sf1	transmembrane 9 superfamily member 1	14	10.6476	10.5833	10.6224	10.722	10.6487	10.3993	10.1338	10.955	10.5053	10.4987	10.6632
ENSMUSG00000002325	1152.94	0.0336433	0.0720222	0.087102	0.935103	Irf9	interferon regulatory factor 9	14	11.4732	11.4513	11.2942	11.6341	11.3876	11.2133	11.1791	11.2387	11.2263	11.4257	11.1679
ENSMUSG00000002326	98.4923	0.00668791	0.062144	0.390747	0.935103	Gmpr2	guanosine monophosphate reductase 2	14	10.2992	10.2491	10.2736	10.1826	10.2221	10.496	10.1464	10.3278	10.3383	10.0829	10.1938
ENSMUSG00000002329	295.005	0.0124885	0.0633151	0.169287	0.935103	Mdp1	magnesium-dependent phosphatase 1	14	11.0287	10.295	10.709	10.6008	10.6977	10.7034	10.6243	10.5052	10.3827	10.5495	10.6499
ENSMUSG00000002332	115.56	0.0137715	0.0636391	0.152085	0.935103	Dhrs1	dehydrogenase/reductase (SDR family) member 1	14	10.3982	10.3546	10.259	10.3905	10.1637	10.5232	10.2749	10.2051	10.2334	10.3024	10.2852
ENSMUSG00000002342	92.8839	-0.000807285	0.0619685	0.837702	0.978492	Tmem161a	transmembrane protein 161A	8	10.1624	10.2516	10.1595	10.5528	10.0396	9.96332	9.93578	10.4261	10.1002	10.129	10.4133
ENSMUSG00000002343	51.851	-0.00215629	0.0620897	0.445598	0.935103	Armc6	armadillo repeat containing 6	8	10.0172	9.90086	9.87275	10.1782	9.99935	10.3483	10.0764	10.4531	10.0815	10.2676	10.0354
ENSMUSG00000002345	124.402	-0.0111833	0.0629474	0.214109	0.935103	Borcs8	BLOC-1 related complex subunit 8	8	10.1414	10.3923	10.1436	10.3462	10.4064	10.1952	10.3569	10.3897	10.4858	10.3668	10.2963
ENSMUSG00000002346	10.1013	-0.000706806	0.06211	0.623479	0.943149	Slc25a42	solute carrier family 25, member 42	8	9.8701	9.8701	9.73298	9.73298	9.87295	9.96605	9.8701	9.8701	10.1042	9.94852	9.73298
ENSMUSG00000002365	847.541	-0.00852949	0.0601304	0.626835	0.944272	Snx9	sorting nexin 9	17	10.9172	11.2308	11.1978	11.0737	11.2266	11.0856	11.2744	11.1467	11.0681	11.2552	11.0891
ENSMUSG00000002372	361.48	-0.00530277	0.0616256	0.541061	0.935103	Ranbp3	RAN binding protein 3	17	10.4616	10.641	10.7169	10.5735	10.7465	10.6684	10.9653	10.5376	10.5132	10.8091	10.5323
ENSMUSG00000002379	172.097	0.00409469	0.0619625	0.525753	0.935103	Ndufa11	NADH:ubiquinone oxidoreductase subunit A11	17	10.7429	10.4718	10.4996	10.1074	10.4831	10.4348	10.2167	10.248	10.5168	10.3507	10.5466
ENSMUSG00000002393	40.1263	0.00245045	0.0621551	0.208132	0.935103	Nr2f6	nuclear receptor subfamily 2, group F, member 6	8	10.5456	9.79625	9.80683	10.2275	10.0047	10.081	9.95871	9.79625	10.011	10.0624	9.97613
ENSMUSG00000002395	1310.36	-0.00968364	0.0614587	0.487191	0.935103	Use1	unconventional SNARE in the ER 1 homolog (S. cerevisiae)	8	11.8194	11.097	11.4023	11.3132	11.5585	11.408	11.3115	11.6858	11.628	11.4364	11.6027
ENSMUSG00000002396	154.71	-0.00586307	0.0621356	0.389658	0.935103	Ocel1	occludin/ELL domain containing 1	8	10.0458	10.4614	10.1528	10.5202	10.2457	10.3966	10.4166	10.506	10.3697	10.445	10.3721
ENSMUSG00000002409	140.057	0.00793719	0.0618323	0.503838	0.935103	Dyrk1b	dual-specificity tyrosine-(Y)-phosphorylation regulated kinase 1b	7	10.4494	10.3811	10.3642	10.3122	10.3181	10.4964	10.4477	10.1838	10.3551	10.3471	10.3654
ENSMUSG00000002413	316.403	0.00081241	0.0617956	0.904873	0.990764	Braf	Braf transforming gene	6	10.7363	10.6351	10.4326	10.7771	10.4645	10.4445	10.6597	10.1981	11.0853	10.227	10.4701
ENSMUSG00000002416	94.1412	0.002195	0.0616205	0.791525	0.973783	Ndufb2	NADH:ubiquinone oxidoreductase subunit B2	6	10.3449	10.2755	10.0895	10.2847	10.2643	10.2438	10.141	10.2101	10.4385	10.163	10.2165
ENSMUSG00000002428	576.745	-0.00173228	0.0614853	0.826554	0.976506	Hltf	helicase-like transcription factor	3	11.1039	10.7135	10.9228	11.1438	10.6012	10.853	10.579	11.1994	10.9816	10.6341	11.1559
ENSMUSG00000002455	1043.21	0.00276601	0.0615794	0.747374	0.969261	Prpf6	pre-mRNA splicing factor 6	2	10.9782	11.0864	11.0196	11.866	11.3448	11.3111	11.5154	11.3747	10.7357	11.2891	11.1044
ENSMUSG00000002458	770.636	-0.0176525	0.0643484	0.175025	0.935103	Rgs19	regulator of G-protein signaling 19	2	10.9927	10.9426	11.1931	11.1747	10.9716	10.8726	10.9572	11.4867	11.3642	10.978	11.1095
ENSMUSG00000002477	302.527	0.00838405	0.062215	0.368377	0.935103	Snrpd1	small nuclear ribonucleoprotein D1	18	10.9673	10.7444	10.5945	10.8042	10.4887	10.5246	10.4902	10.3323	10.6603	10.6882	10.6742
ENSMUSG00000002486	156.115	0.0159556	0.0648308	0.0228933	0.723456	Tchp	trichoplein, keratin filament binding	5	10.4782	10.3925	10.8275	10.4435	10.3471	10.2053	10.2458	10.2943	10.2652	10.0414	10.3389
ENSMUSG00000002496	489.035	0.00464124	0.0618852	0.554148	0.935103	Tsc2	TSC complex subunit 2	17	10.2889	11.2808	10.9078	10.7079	10.9312	11.0247	11.157	10.599	10.8089	10.8818	10.5577
ENSMUSG00000002504	5.05463	0.000484033	0.0621189	0.523321	0.935103	Slc9a3r2	solute carrier family 9 (sodium/hydrogen exchanger), member 3 regulator 2	17	9.75664	10.1158	9.84644	9.84644	9.84644	9.84644	9.75664	9.75664	9.84644	9.84644	9.84644
ENSMUSG00000002524	737.01	-0.0200578	0.0645364	0.213781	0.935103	Puf60	poly-U binding splicing factor 60	15	10.8277	11.2198	11.036	10.9492	10.9735	10.8771	11.0663	11.043	11.2864	11.1545	10.9976
ENSMUSG00000002546	336.318	-0.0267474	0.0696578	0.0294421	0.759662	Golga2	golgi autoantigen, golgin subfamily a, 2	2	10.4433	10.6025	10.5546	10.7858	10.5459	10.4811	10.746	10.8527	10.5866	10.6767	10.997
ENSMUSG00000002550	145.194	0.00187017	0.0614452	0.839762	0.978933	Uck1	uridine-cytidine kinase 1	2	10.4643	10.3772	10.4282	10.2549	10.4253	10.3825	10.5104	10.151	10.2705	10.4404	10.4283
ENSMUSG00000002565	0.866174	-0.000534691	0.0621192	0.585993	0.935103	Scin	scinderin	12	9.78291	9.78291	9.82017	9.82017	9.82017	9.82017	9.78291	9.93192	9.82017	9.82017	9.82017
ENSMUSG00000002578	1.22412	0.000739547	0.0621224	0.331121	0.935103	Ikzf4	IKAROS family zinc finger 4	10	9.81419	9.81419	9.78889	9.78889	9.78889	9.966	9.81419	9.81419	9.78889	9.78889	9.78889
ENSMUSG00000002580	109.396	-0.0104069	0.0628255	0.202386	0.935103	Mien1	migration and invasion enhancer 1	11	10.1366	10.2198	10.4021	10.2597	10.3217	10.1976	10.2838	10.5656	10.2686	10.402	10.2582
ENSMUSG00000002602	67.0976	0.000700412	0.0620974	0.606996	0.939563	Axl	AXL receptor tyrosine kinase	7	9.88139	10.6308	9.90515	10.1904	10.0226	10.1034	9.88139	9.88139	10.4188	9.72169	10.1191
ENSMUSG00000002603	1049.43	-0.0336608	0.0688707	0.153879	0.935103	Tgfb1	transforming growth factor, beta 1	7	11.2046	11.2818	11.1945	11.2534	11.3019	11.2427	11.2245	11.4568	11.4868	11.2813	11.2829
ENSMUSG00000002608	341.899	0.00190709	0.0607141	0.884606	0.988057	Ccdc97	coiled-coil domain containing 97	7	10.6578	10.5742	10.913	10.5579	10.6058	10.7252	10.6806	10.7632	10.6304	10.5488	10.7015
ENSMUSG00000002617	72.2383	-0.00148047	0.0619113	0.769481	0.97041	Zfp40	zinc finger protein 40	17	10.1907	10.0185	10.0798	10.1471	10.2947	10.31	10.1141	10.4774	10.1061	10.2701	10.1935
ENSMUSG00000002625	397.749	-0.00516134	0.0615212	0.611823	0.939563	Akap8l	A kinase (PRKA) anchor protein 8-like	17	10.4847	10.7508	10.5071	10.7528	10.7412	10.9775	10.9113	10.7757	10.8912	10.5984	10.6462
ENSMUSG00000002635	166.166	0.0156532	0.0644582	0.0728737	0.924167	Pdcd2l	programmed cell death 2-like	7	10.5997	10.6204	10.4455	10.3084	10.5312	10.4602	10.3634	10.0755	10.4222	10.4225	10.3132
ENSMUSG00000002658	306.971	0.000964575	0.0611447	0.931537	0.993986	Gtf2f1	general transcription factor IIF, polypeptide 1	17	10.4522	10.8655	10.5142	10.4824	10.7248	10.7963	10.6605	10.5855	10.5603	10.662	10.7466
ENSMUSG00000002660	129.295	0.00290281	0.0620859	0.47878	0.935103	Clpp	caseinolytic mitochondrial matrix peptidase proteolytic subunit	17	10.8316	10.1489	10.2505	10.3322	10.3634	10.3123	10.4575	9.74195	10.1836	10.4371	10.186
ENSMUSG00000002661	20.5399	0.00245831	0.0621435	0.323197	0.935103	Alkbh7	alkB homolog 7	17	10.2705	9.76524	9.98962	9.88563	10.0801	10.0473	10.0896	9.76524	9.99485	9.87935	9.93179
ENSMUSG00000002668	340.779	0.0122557	0.0632695	0.174091	0.935103	Dennd1c	DENN/MADD domain containing 1C	17	10.8692	10.6654	10.5346	10.3381	10.8487	10.8838	10.6362	10.3323	10.6585	10.5349	10.5816
ENSMUSG00000002679	65.2342	-0.0188019	0.0662373	0.0005635	0.0995535	Med6	mediator complex subunit 6	12	9.93397	9.97267	9.94859	10.1599	10.1074	10.136	10.3595	10.391	10.3709	10.1263	10.3008
ENSMUSG00000002699	19.509	0.00450227	0.062319	0.0867067	0.935103	Lcp2	lymphocyte cytosolic protein 2	11	9.90555	9.9783	10.1969	9.94095	9.91668	9.94784	9.90555	9.90555	9.92783	9.69753	9.83843
ENSMUSG00000002718	514.16	-0.0212719	0.0654841	0.163771	0.935103	Cse1l	chromosome segregation 1-like (S. cerevisiae)	2	10.8467	10.7323	10.8623	10.9202	10.7522	10.7423	11.1541	10.7168	10.983	10.9573	10.8201
ENSMUSG00000002728	92.0967	-0.00241398	0.0619474	0.624531	0.943306	Naa20	N(alpha)-acetyltransferase 20, NatB catalytic subunit	2	10.1855	10.0926	10.3949	10.1048	10.1887	10.3343	10.6439	10.0673	10.3466	10.1881	10.1739
ENSMUSG00000002731	8.82749	-0.000789948	0.0621021	0.445261	0.935103	Prkra	protein kinase, interferon inducible double stranded RNA dependent activator	2	9.83015	9.83015	9.99557	9.77293	9.91911	9.94404	10.1007	9.83015	9.84839	9.98445	9.81992
ENSMUSG00000002732	8.26878	-0.00356294	0.0622588	0.0216176	0.715917	Fkbp7	FK506 binding protein 7	2	9.78961	9.86236	9.81347	9.89624	9.81347	9.81347	10.1229	9.78961	9.92017	9.90629	10.0747
ENSMUSG00000002733	131.822	0.00909134	0.06234	0.339763	0.935103	Plekha3	pleckstrin homology domain-containing, family A (phosphoinositide binding specific) member 3	2	10.5141	10.3238	10.3626	10.315	10.5063	10.3308	10.3728	10.2211	10.2188	10.3081	10.4641
ENSMUSG00000002741	210.713	-0.00585739	0.0612449	0.624251	0.943149	Ykt6	YKT6 v-SNARE homolog (S. cerevisiae)	11	10.4291	10.5105	10.5154	10.3572	10.4306	10.4477	10.3304	10.5799	10.6209	10.4202	10.4454
ENSMUSG00000002748	1918.35	-0.00533073	0.0538775	0.839612	0.978933	Baz1b	bromodomain adjacent to zinc finger domain, 1B	5	11.8284	11.7406	11.8096	11.7808	11.7791	11.7728	11.7058	11.8857	11.7332	11.8741	11.7813
ENSMUSG00000002763	192.177	0.0101637	0.062815	0.212321	0.935103	Pex6	peroxisomal biogenesis factor 6	17	10.4665	10.5599	10.6465	10.552	10.389	10.3548	10.5596	10.1393	10.3017	10.4874	10.2878
ENSMUSG00000002767	86.0699	0.00135228	0.061998	0.734356	0.967379	Mrpl2	mitochondrial ribosomal protein L2	17	9.83085	10.3349	10.435	10.1384	10.3032	10.2023	10.3801	10.2793	10.0541	10.0711	10.24
ENSMUSG00000002768	300.16	-0.00973407	0.0622607	0.361073	0.935103	Mea1	male enhanced antigen 1	17	10.5667	10.4773	10.887	10.5283	10.6178	10.4334	10.6932	10.7948	10.6325	10.5932	10.7389
ENSMUSG00000002778	263.961	-0.0087671	0.0621766	0.389006	0.935103	Kdelr1	KDEL (Lys-Asp-Glu-Leu) endoplasmic reticulum protein retention receptor 1	7	10.7923	10.4537	10.5259	10.593	10.5356	10.4174	10.3295	10.7541	10.7716	10.6065	10.6267
ENSMUSG00000002781	29.1998	0.00189866	0.0620812	0.557062	0.935103	Tmem143	transmembrane protein 143	7	9.85988	10.2154	9.88283	9.95136	10.168	10.0848	10.0958	9.85988	10.0382	9.86772	10.0612
ENSMUSG00000002791	2.80565	-0.00139666	0.0621392	0.114821	0.935103	Pdxk-ps	pyridoxal (pyridoxine, vitamin B6) kinase, pseudogene	17	9.78425	9.78425	9.81883	9.81883	9.81883	9.81883	10.0074	9.78425	9.81883	9.81883	9.96734
ENSMUSG00000002797	326.549	-0.00705872	0.0622782	0.319135	0.935103	Ggct	gamma-glutamyl cyclotransferase	6	10.616	10.3974	10.6076	10.3725	10.6863	10.7867	11.2481	10.2753	10.6466	10.6535	10.6862
ENSMUSG00000002799	1.3814	0.000745716	0.0621225	0.310282	0.935103	Jag2	jagged 2	12	9.82378	9.82378	9.7793	9.92263	9.88268	9.844	9.82378	9.82378	9.7793	9.7793	9.7793
ENSMUSG00000002803	111.675	2.7346e-05	0.0620242	0.920087	0.992402	Btbd6	BTB (POZ) domain containing 6	12	9.9166	10.3236	10.2013	10.6901	9.88878	10.2113	10.0493	10.5064	10.3317	9.92471	10.1449
ENSMUSG00000002804	97.9492	0.00143779	0.0619931	0.684526	0.955797	Nudt14	nudix (nucleoside diphosphate linked moiety X)-type motif 14	12	10.3025	10.2994	10.2259	10.3973	10.2972	10.2283	10.592	9.77761	10.136	10.2651	10.1503
ENSMUSG00000002812	659.862	0.000810632	0.0611814	0.945242	0.995639	Flii	flightless I actin binding protein	11	11.3043	10.7324	11.1147	10.8576	10.9013	10.7844	10.7954	10.9763	11.2667	10.7916	10.9483
ENSMUSG00000002814	144.846	-0.0124543	0.0634626	0.122109	0.935103	Top3a	topoisomerase (DNA) III alpha	11	10.2465	10.4244	10.2194	10.2368	10.3032	10.3152	10.6114	10.1158	10.5499	10.4011	10.4212
ENSMUSG00000002820	169.553	-0.00527787	0.0622324	0.311959	0.935103	Atg4d	autophagy related 4D, cysteine peptidase	9	9.97325	10.5308	9.99066	10.2711	10.2833	10.5671	10.4104	10.5305	10.378	10.7008	10.3377
ENSMUSG00000002825	38.8488	-5.55183e-05	0.0620641	0.973793	0.998814	Qtrt1	queuine tRNA-ribosyltransferase catalytic subunit 1	9	9.82084	10.4144	9.99264	10.1127	10.017	9.828	10.0913	9.82084	10.2671	9.97683	10.0637
ENSMUSG00000002831	5.3641	0.000487771	0.0621189	0.522559	0.935103	Plin4	perilipin 4	17	9.7553	10.1253	9.84779	9.84779	9.84779	9.84779	9.7553	9.7553	9.84779	9.84779	9.84779
ENSMUSG00000002833	297.158	0.00721206	0.0619096	0.469269	0.935103	Hdgfl2	HDGF like 2	17	10.5297	10.9309	10.8204	10.5359	10.5859	10.6088	10.417	10.6466	10.7847	10.6123	10.4695
ENSMUSG00000002835	96.158	0.00547917	0.0623896	0.0671771	0.911911	Chaf1a	chromatin assembly factor 1, subunit A (p150)	17	9.94187	10.4053	10.6076	10.6332	10.1097	10.021	10.2732	10.2366	10.0117	9.9515	10.165
ENSMUSG00000002844	489.914	0.0085095	0.0616036	0.504272	0.935103	Adprh	ADP-ribosylarginine hydrolase	16	10.8887	10.9101	10.6673	11.0946	10.7763	10.8113	10.909	10.6033	10.9558	10.7165	10.7725
ENSMUSG00000002845	69.9904	0.00186643	0.0620402	0.578641	0.935103	Tmem39a	transmembrane protein 39a	16	10.3028	10.3632	10.0509	10.1028	10.1883	10.09	9.86951	10.0666	10.0813	10.412	10.1282
ENSMUSG00000002846	129.274	-0.000552862	0.0618094	0.925124	0.99336	Timmdc1	translocase of inner mitochondrial membrane domain containing 1	16	10.47	10.1261	10.1844	10.4963	10.142	10.2634	10.4218	10.1316	10.1241	10.5233	10.2783
ENSMUSG00000002870	655.321	-0.00221996	0.0618768	0.701778	0.960204	Mcm2	minichromosome maintenance complex component 2	6	11.2057	10.4408	11.173	10.6511	11.0201	10.9376	11.8922	10.1739	11.0476	10.9438	10.7237
ENSMUSG00000002871	198.666	0.00618867	0.0620588	0.43843	0.935103	Tpra1	transmembrane protein, adipocyte asscociated 1	6	10.6578	10.3207	10.7308	10.5126	10.4572	10.2379	10.3474	10.485	10.3318	10.6173	10.2816
ENSMUSG00000002881	1449.49	0.0920233	0.173253	0.0167193	0.646454	Nab1	Ngfi-A binding protein 1	1	11.796	11.5078	11.5762	11.5045	11.5495	11.6717	11.3358	11.404	11.351	11.5355	11.3877
ENSMUSG00000002885	3159.44	0.00230595	0.0601441	0.882179	0.987779	Adgre5	adhesion G protein-coupled receptor E5	8	12.6141	12.2014	12.1413	12.1047	12.0043	12.2659	11.7699	12.2458	12.4639	12.1766	12.2981
ENSMUSG00000002897	1520.2	0.0639208	0.117026	0.00797478	0.512781	Il17ra	interleukin 17 receptor A	6	11.6643	11.7216	11.6037	11.6787	11.3865	11.8382	11.5377	11.1258	11.3447	11.3457	11.3887
ENSMUSG00000002900	6.17149	-0.000567241	0.0621199	0.533372	0.935103	Lamb1	laminin B1	12	9.75196	9.75196	9.85112	9.85112	9.85112	9.85112	9.75196	10.1486	9.85112	9.85112	9.85112
ENSMUSG00000002908	2.51734	-0.000556605	0.0621197	0.548613	0.935103	Kcnn1	potassium intermediate/small conductance calcium-activated channel, subfamily N, member 1	8	9.76981	9.76981	9.83327	9.83327	9.83327	9.83327	10.0236	9.76981	9.83327	9.83327	9.83327
ENSMUSG00000002910	64.0806	-0.0049085	0.062098	0.40409	0.935103	Arrdc2	arrestin domain containing 2	8	10.1004	10.0868	10.1706	10.1539	10.1948	10.2147	10.0925	10.4086	10.1805	10.3076	9.98248
ENSMUSG00000002944	1700.88	0.0123047	0.061878	0.418504	0.935103	Cd36	CD36 molecule	5	11.9066	11.7417	11.5403	11.5355	11.499	11.7566	11.6218	11.1885	11.7219	11.6034	11.6458
ENSMUSG00000002948	463.132	1.09352	0.233713	1.15185e-07	3.55259e-05	Map2k7	mitogen-activated protein kinase kinase 7	8	10.8792	11.0664	10.9995	11.0723	10.7453	10.9738	10.6583	10.5377	10.6037	10.5887	10.5143
ENSMUSG00000002949	353.796	-0.016434	0.0642005	0.141628	0.935103	Timm44	translocase of inner mitochondrial membrane 44	8	10.4354	10.6362	10.8714	10.7358	10.5432	10.5661	10.7376	11.007	10.7082	10.7461	10.7577
ENSMUSG00000002957	380.13	0.00659829	0.0596883	0.714116	0.963116	Ap2a2	adaptor-related protein complex 2, alpha 2 subunit	7	10.669	10.7017	10.8549	10.6928	10.5839	10.6926	10.6604	10.7271	10.6134	10.679	10.7102
ENSMUSG00000002963	228.96	-0.0179256	0.0648695	0.113011	0.935103	Pnkp	polynucleotide kinase 3'- phosphatase	7	10.3247	10.4992	10.5841	10.3472	10.4586	10.5425	10.7748	10.4754	10.4856	10.666	10.5455
ENSMUSG00000002968	193.4	0.00395552	0.0620486	0.487966	0.935103	Med25	mediator complex subunit 25	7	10.2589	10.6099	10.6672	10.2965	10.5869	10.0784	10.5417	10.0941	10.3922	10.3717	10.2403
ENSMUSG00000002980	1.13471	0.000465666	0.0621184	0.560635	0.935103	Bcam	basal cell adhesion molecule	7	9.78023	9.95075	9.82286	9.82286	9.82286	9.82286	9.78023	9.78023	9.82286	9.82286	9.82286
ENSMUSG00000002981	518.049	0.00425215	0.0617427	0.619556	0.942458	Clptm1	cleft lip and palate associated transmembrane protein 1	7	10.6339	11.1906	10.8302	10.9742	10.9021	10.8678	10.4405	11.1373	11.1282	10.6113	10.6402
ENSMUSG00000002983	364.095	-0.00622371	0.0617094	0.524458	0.935103	Relb	avian reticuloendotheliosis viral (v-rel) oncogene related B	7	10.395	10.6906	10.5837	10.6831	10.8904	10.6701	10.9713	10.6738	10.6113	10.7476	10.5926
ENSMUSG00000002984	176.71	-0.019313	0.0661039	0.0220885	0.7207	Tomm40	translocase of outer mitochondrial membrane 40	7	10.4603	10.091	10.229	10.4806	10.3357	10.3322	10.7375	10.4163	10.5568	10.3931	10.6565
ENSMUSG00000002985	465.869	-0.00529289	0.0620105	0.467649	0.935103	Apoe	apolipoprotein E	7	11.0033	10.721	10.8856	10.8365	10.6108	10.7668	10.5387	11.0123	11.2073	10.9271	10.4976
ENSMUSG00000002996	312.94	-0.0112488	0.0626311	0.300758	0.935103	Hbp1	high mobility group box transcription factor 1	12	10.6454	10.5726	10.5741	10.3179	10.5722	10.6237	10.4679	10.7042	10.5084	10.9248	10.6615
ENSMUSG00000002997	4.32512	-0.000695264	0.0621143	0.604914	0.939563	Prkar2b	protein kinase, cAMP dependent regulatory, type II beta	12	9.84286	9.84286	9.76022	9.80801	9.91236	9.76022	9.84286	9.84286	9.86692	10.0321	9.76022
ENSMUSG00000003031	842.118	0.0360833	0.0725743	0.105227	0.935103	Cdkn1b	cyclin-dependent kinase inhibitor 1B	6	11.3027	11.2037	11.1127	11.0473	11.1459	11.2305	10.9783	10.9979	11.0371	11.0839	11.1872
ENSMUSG00000003032	129.535	0.00597289	0.0623955	0.128891	0.935103	Klf4	Kruppel-like factor 4 (gut)	4	10.1425	10.7298	10.2312	10.3734	10.285	10.1541	10.0478	10.1294	10.2959	10.3408	10.1562
ENSMUSG00000003033	806.719	-0.00326283	0.0612743	0.755588	0.969546	Ap1m1	adaptor-related protein complex AP-1, mu subunit 1	8	11.5138	10.9424	10.9031	10.9722	11.0181	10.9274	10.9143	10.9343	11.3138	11.3525	11.0464
ENSMUSG00000003037	1002.82	0.0250773	0.0682857	0.059454	0.878866	Rab8a	RAB8A, member RAS oncogene family	8	11.5482	11.3206	11.3729	11.448	11.1412	11.2233	11.2337	10.7888	10.8901	11.3294	11.1548
ENSMUSG00000003038	963.211	-0.0147306	0.0611881	0.436981	0.935103	Hmgn2	high mobility group nucleosomal binding domain 2	4	10.9767	11.4048	11.2111	11.2951	11.2098	11.2537	11.3262	11.33	11.2122	11.3526	11.2816
ENSMUSG00000003039	567.53	0.00680287	0.0615708	0.553219	0.935103	Fam32a	family with sequence similarity 32, member A	8	11.0434	10.9464	10.9677	10.9407	10.908	10.9159	10.472	11.1775	10.8915	10.9048	10.8402
ENSMUSG00000003062	79.6201	-0.00898943	0.0624615	0.300444	0.935103	Stard3nl	STARD3 N-terminal like	13	10.1762	10.2379	10.0667	10.2273	10.1975	10.3003	10.3807	10.1309	10.2764	10.3005	10.2511
ENSMUSG00000003068	432.728	0.0102557	0.0622235	0.380663	0.935103	Stk11	serine/threonine kinase 11	10	11.1641	10.6688	10.9028	10.6427	10.7939	10.8221	10.7766	10.5525	10.7513	10.8991	10.7214
ENSMUSG00000003070	1.08272	-0.00054066	0.0621193	0.575977	0.935103	Efna2	ephrin A2	10	9.78072	9.78072	9.82236	9.82236	9.82236	9.82236	9.78072	9.94729	9.82236	9.82236	9.82236
ENSMUSG00000003072	728.347	0.00721108	0.0593597	0.693821	0.958777	Atp5d	ATP synthase, H+ transporting, mitochondrial F1 complex, delta subunit	10	11.0109	11.2018	10.9336	11.0806	11.0602	11.096	11.0795	10.9116	11.1344	11.0741	10.9777
ENSMUSG00000003099	370.443	0.00595791	0.061834	0.523698	0.935103	Ppp5c	protein phosphatase 5, catalytic subunit	7	10.7253	10.8934	10.723	10.5461	10.9025	10.7804	10.9738	10.2725	10.7557	10.7015	10.6045
ENSMUSG00000003119	986.81	0.00448175	0.0603951	0.766577	0.969719	Cdk12	cyclin-dependent kinase 12	11	11.5388	11.1137	11.0244	11.1583	11.4507	11.2973	11.1143	11.2486	11.2597	11.2692	11.3174
ENSMUSG00000003123	246.036	0.00364885	0.0616572	0.69617	0.959335	Lipe	lipase, hormone sensitive	7	10.5877	10.5851	10.3652	10.8567	10.5447	10.2002	10.4876	10.411	10.5955	10.5083	10.5544
ENSMUSG00000003131	516.625	-0.00776976	0.0617362	0.493143	0.935103	Pafah1b2	platelet-activating factor acetylhydrolase, isoform 1b, subunit 2	9	11.0174	10.6292	10.5534	11.0063	10.8311	10.9253	10.7952	11.0316	10.7659	10.9498	11.0467
ENSMUSG00000003135	200.709	0.0059281	0.0620949	0.414625	0.935103	Cnot11	CCR4-NOT transcription complex, subunit 11	1	10.4181	10.7086	10.4377	10.5892	10.5497	10.4453	10.5816	10.1656	10.1491	10.5491	10.5592
ENSMUSG00000003153	533.998	0.0108522	0.0626745	0.280841	0.935103	Slc2a3	solute carrier family 2 (facilitated glucose transporter), member 3	6	10.7415	10.8356	10.5445	11.2443	10.8528	10.6285	10.5775	10.8378	10.7257	10.8036	10.4373
ENSMUSG00000003154	713.075	0.00873472	0.0622883	0.351274	0.935103	Foxj2	forkhead box J2	6	10.6305	11.4202	11.4329	11.0515	10.9353	10.8027	10.8193	11.1163	10.9256	10.9588	10.8692
ENSMUSG00000003161	931.895	0.00471492	0.0615826	0.63753	0.946129	Sri	sorcin	5	11.6705	10.9224	11.4951	10.8925	11.2283	11.2566	11.3262	10.9218	10.9609	11.5077	11.1303
ENSMUSG00000003166	499.806	-0.0194031	0.0657906	0.0431847	0.82554	Dgcr2	DiGeorge syndrome critical region gene 2	16	10.4811	10.5165	10.7328	10.89	10.776	10.9754	11.1896	11.2029	10.886	10.7726	10.8998
ENSMUSG00000003184	412.409	-0.00212224	0.0604538	0.869625	0.986764	Irf3	interferon regulatory factor 3	7	10.7392	10.7572	10.8042	10.7804	10.7761	10.8321	10.7493	10.8942	10.883	10.548	10.871
ENSMUSG00000003190	102.118	-0.000518824	0.0616637	0.940422	0.995596	Bcl2l12	BCL2-like 12 (proline rich)	7	10.4506	10.191	10.1227	10.4508	10.1316	10.2398	10.2676	10.1866	10.2658	10.3986	10.3083
ENSMUSG00000003198	87.503	0.00279532	0.0620644	0.462043	0.935103	Zfp959	zinc finger protein 959	17	10.1496	10.445	10.0285	10.2385	10.0875	10.1531	9.99252	10.0964	10.0508	10.2705	10.3672
ENSMUSG00000003199	348.189	0.0194202	0.0653616	0.116902	0.935103	Mpnd	MPN domain containing	17	10.83	10.6064	10.9085	10.785	10.7966	10.6071	10.84	10.5068	10.5503	10.6644	10.5587
ENSMUSG00000003200	300.768	0.0261672	0.0695986	0.0158853	0.642366	Sh3gl1	SH3-domain GRB2-like 1	17	10.5927	10.8137	10.389	10.7659	10.709	10.6308	10.3761	10.4479	10.4185	10.6306	10.3594
ENSMUSG00000003206	83.9074	-0.00171059	0.0619845	0.699356	0.959453	Ebi3	Epstein-Barr virus induced gene 3	17	9.82913	10.4139	10.08	10.2521	10.1187	10.2809	10.1204	10.4414	10.2432	10.3122	10.1216
ENSMUSG00000003208	191.299	-0.000155876	0.0620385	0.931733	0.993986	Yju2	YJU2 splicing factor	17	9.78554	10.255	10.5751	10.4196	10.589	10.4901	10.5774	10.9699	10.3043	10.1856	10.215
ENSMUSG00000003226	2590.03	-0.0310744	0.0658436	0.221498	0.935103	Ranbp2	RAN binding protein 2	10	12.0666	11.8784	11.9666	12.032	11.9696	12.0707	12.248	11.991	11.9632	12.2361	12.0838
ENSMUSG00000003228	518.433	-0.0165484	0.064181	0.167493	0.935103	Grk5	G protein-coupled receptor kinase 5	19	11.0235	10.6372	10.8843	10.9112	10.8398	10.6399	10.9983	10.901	11.2546	10.7895	10.9105
ENSMUSG00000003233	120.755	-0.00428253	0.0619496	0.52883	0.935103	Dvl3	dishevelled segment polarity protein 3	16	10.3991	10.1377	10.3693	10.1406	10.3107	10.3868	10.2041	10.5123	10.3208	10.544	10.1211
ENSMUSG00000003234	409.066	-0.00377446	0.0618819	0.580187	0.935103	Abcf3	ATP-binding cassette, sub-family F (GCN20), member 3	16	11.216	10.4966	10.3728	10.722	10.6693	10.545	10.8142	10.3366	10.9495	10.939	10.8134
ENSMUSG00000003235	401.333	-0.00500177	0.0618683	0.520931	0.935103	Eif2b5	eukaryotic translation initiation factor 2B, subunit 5 epsilon	16	10.3428	10.9067	10.6428	11.029	10.5198	10.5889	11.0754	10.5642	10.9112	10.6351	10.7292
ENSMUSG00000003269	165.943	-0.0021965	0.0619669	0.653374	0.948727	Cyth2	cytohesin 2	7	10.0779	10.536	10.4056	10.1941	10.5048	10.388	10.0112	10.8405	10.1658	10.5727	10.3337
ENSMUSG00000003271	8.18701	-0.000487899	0.0621191	0.0526643	0.852077	Sult2b1	sulfotransferase family, cytosolic, 2B, member 1	7	9.81806	9.98859	9.78502	9.78502	9.78502	9.78502	9.81806	9.81806	9.78502	10.1905	9.90929
ENSMUSG00000003283	1230.47	-0.000320768	0.0594273	0.986802	0.999188	Hck	hemopoietic cell kinase	2	11.6087	11.3301	11.4757	11.2791	11.3469	11.386	11.5289	11.1477	11.4835	11.3675	11.4883
ENSMUSG00000003299	198.903	0.00332262	0.0617809	0.653925	0.94891	Mrpl4	mitochondrial ribosomal protein L4	9	10.8892	10.3623	10.5134	10.4128	10.311	10.4388	10.2116	10.3876	10.422	10.5788	10.5619
ENSMUSG00000003308	317.804	0.00692031	0.0621653	0.383724	0.935103	Keap1	kelch-like ECH-associated protein 1	9	10.7233	10.4599	10.4355	11.2084	10.4636	10.5089	10.6255	10.587	10.445	10.598	10.533
ENSMUSG00000003309	8.27226	-0.00071555	0.0621048	0.490477	0.935103	Ap1m2	adaptor protein complex AP-1, mu 2 subunit	9	9.83896	9.83896	10.013	9.76413	9.85851	9.96342	9.83896	10.0214	9.80769	9.76413	10.0211
ENSMUSG00000003316	1365.37	-0.0109149	0.0596461	0.565385	0.935103	Glg1	golgi apparatus protein 1	8	11.5132	11.4255	11.507	11.2997	11.5947	11.4815	11.4236	11.6102	11.3532	11.6084	11.6076
ENSMUSG00000003344	111.294	0.000321438	0.0619624	0.946737	0.995734	Btbd2	BTB (POZ) domain containing 2	10	9.95662	10.445	10.3984	10.2738	10.0608	10.1133	10.4081	10.062	10.1875	10.2165	10.2753
ENSMUSG00000003345	677.984	0.0114449	0.0619148	0.429315	0.935103	Csnk1g2	casein kinase 1, gamma 2	10	11.0513	11.3028	11.1835	10.8346	11.0038	11.0367	10.856	10.9092	11.0763	10.9173	11.1565
ENSMUSG00000003346	355.937	0.0153577	0.0625918	0.337895	0.935103	Abhd17a	abhydrolase domain containing 17A	10	10.7997	10.5492	10.7133	10.5924	10.6194	10.7105	10.5592	10.6445	10.5661	10.6391	10.6263
ENSMUSG00000003348	826.293	-0.00949596	0.0618809	0.420151	0.935103	Mob3a	MOB kinase activator 3A	10	11.1655	10.7566	11.2057	10.9861	11.2211	11.2389	11.5348	11.1344	11.0469	11.0437	11.2923
ENSMUSG00000003355	13.1554	0.00122519	0.062122	0.253106	0.935103	Fkbp11	FK506 binding protein 11	15	9.87191	9.87191	9.8708	9.73117	10.052	10.166	9.92609	9.87191	9.73117	9.86882	9.77815
ENSMUSG00000003360	823.594	0.0231535	0.0677658	0.0300156	0.761719	Ddx23	DEAD box helicase 23	15	10.8619	11.7703	11.2851	11.1384	11.2196	11.3278	11.2477	10.6138	11.0205	11.0009	10.8715
ENSMUSG00000003363	393.66	0.00757501	0.0620898	0.419944	0.935103	Pld3	phospholipase D family, member 3	7	11.0281	10.7429	10.7164	10.8681	10.6571	10.4814	10.7041	10.3532	10.7417	10.8213	10.6635
ENSMUSG00000003378	4.27697	0.00120116	0.0621335	0.074423	0.924167	Grik5	glutamate receptor, ionotropic, kainate 5 (gamma 2)	7	9.80985	9.97245	9.79323	9.79323	9.95664	10.0307	9.80985	9.80985	9.79323	9.79323	9.79323
ENSMUSG00000003379	8206.42	-0.0124111	0.0555253	0.642665	0.94755	Cd79a	CD79A antigen (immunoglobulin-associated alpha)	7	13.3895	13.3019	13.3738	13.1738	13.1275	13.2693	13.2297	13.2481	13.4394	13.3371	13.3255
ENSMUSG00000003380	240.064	-0.0120992	0.062813	0.277658	0.935103	Rabac1	Rab acceptor 1 (prenylated)	7	10.7474	10.3759	10.5584	10.5035	10.542	10.3616	10.6471	10.4449	10.6046	10.6961	10.6108
ENSMUSG00000003382	1665.31	0.0046693	0.0602397	0.751412	0.969546	Etv3	ets variant 3	3	11.7885	11.6352	11.6431	11.5474	11.7209	11.643	11.2016	11.919	11.6348	11.5979	11.6653
ENSMUSG00000003402	414.04	-0.0122977	0.062399	0.283657	0.935103	Prkcsh	protein kinase C substrate 80K-H	9	10.5705	10.6648	10.8403	10.8296	10.7255	10.709	10.7843	11.0465	10.7201	10.6541	10.8871
ENSMUSG00000003418	469.714	-0.031154	0.0729138	0.0141418	0.625839	St8sia6	ST8 alpha-N-acetyl-neuraminide alpha-2,8-sialyltransferase 6	2	10.6067	10.5186	10.7616	10.8789	10.6615	10.6527	10.9	11.1333	10.6418	10.8991	11.0317
ENSMUSG00000003420	24.631	0.00458324	0.0623476	0.00916333	0.534439	Fcgrt	Fc fragment of IgG receptor and transporter	7	9.84441	10.3407	10.1077	10.0751	10.0219	9.94719	9.84441	9.84441	9.97192	9.83057	9.82511
ENSMUSG00000003421	257.252	0.00807114	0.0618814	0.457593	0.935103	Nosip	nitric oxide synthase interacting protein	7	10.4393	10.7054	10.7371	10.6174	10.4936	10.6149	10.3768	10.7767	10.5258	10.4865	10.5466
ENSMUSG00000003423	180.02	0.00861429	0.0625269	0.241638	0.935103	Pih1d1	PIH1 domain containing 1	7	10.7414	10.6809	10.51	10.3442	10.4745	10.3409	10.2142	10.124	10.5211	10.4233	10.4667
ENSMUSG00000003429	6625.2	-0.0020189	0.0503832	0.943993	0.995639	Rps11	ribosomal protein S11	7	13.1831	13.008	13.0435	13.0289	13.0924	13.047	13.0743	13.0099	13.1203	13.1186	13.0309
ENSMUSG00000003435	1194.43	0.00323421	0.057992	0.880883	0.987779	Supt5	suppressor of Ty 5, DSIF elongation factor subunit	7	11.4318	11.3324	11.5051	11.3474	11.4752	11.4006	11.5907	11.286	11.3192	11.3841	11.4397
ENSMUSG00000003437	544.693	0.00425704	0.0611793	0.720464	0.964205	Paf1	Paf1, RNA polymerase II complex component	7	11.1968	10.7128	10.9597	11.1221	10.742	10.891	10.993	10.7832	10.9525	10.743	11.0396
ENSMUSG00000003438	343.028	0.00914536	0.0625339	0.269116	0.935103	Timm50	translocase of inner mitochondrial membrane 50	7	11.0212	10.9875	10.6649	10.631	10.6557	10.6153	10.5877	10.0191	10.7294	10.651	10.6299
ENSMUSG00000003444	82.2233	-0.00671772	0.0620621	0.430776	0.935103	Med29	mediator complex subunit 29	7	10.0439	10.3023	10.1745	10.2636	10.1864	10.2133	10.307	10.2382	10.2613	10.3351	10.126
ENSMUSG00000003452	170.865	0.00112693	0.061991	0.765648	0.969546	Bicd1	BICD cargo adaptor 1	6	10.2366	10.1552	10.1312	10.2811	10.0442	11.0017	10.4921	10.1922	10.1578	10.0908	10.1762
ENSMUSG00000003458	521.174	0.00223775	0.0614894	0.792027	0.973783	Ncstn	nicastrin	1	11.2185	10.7156	10.7145	10.966	10.8402	10.8576	11.1281	10.3731	10.8335	10.8642	10.9359
ENSMUSG00000003464	257.126	-0.0267335	0.0702143	0.00846573	0.513503	Pex19	peroxisomal biogenesis factor 19	1	10.2529	10.6175	10.2805	10.4026	10.4603	10.5706	10.7133	10.6353	10.8716	10.7867	10.511
ENSMUSG00000003484	436.329	-0.00346456	0.0615907	0.668908	0.952196	Cyp4f18	cytochrome P450, family 4, subfamily f, polypeptide 18	8	10.6615	10.6292	10.9171	10.9706	10.6484	10.7391	11.2869	10.5564	10.6666	10.6502	10.8924
ENSMUSG00000003500	99.7465	-0.00973963	0.0628905	0.151583	0.935103	Impdh1	inosine monophosphate dehydrogenase 1	6	10.2399	10.1739	10.0335	10.38	10.1044	10.3305	10.3253	10.3626	10.4725	10.2136	10.3936
ENSMUSG00000003505	1.51069	-0.000474479	0.0621173	0.677648	0.953618	Psg18	pregnancy specific glycoprotein 18	7	9.77137	9.82282	9.83171	9.83171	9.83171	9.83171	9.77137	9.96127	9.83171	9.83171	9.83171
ENSMUSG00000003518	36.3004	-0.00184209	0.0620953	0.467269	0.935103	Dusp3	dual specificity phosphatase 3 (vaccinia virus phosphatase VH1-related)	11	9.89978	10.0452	10.0093	10.0904	9.98916	10.0063	10.196	9.89978	10.246	10.0269	9.7033
ENSMUSG00000003527	192.132	0.0261511	0.0689564	0.0500523	0.847197	Ess2	ess-2 splicing factor	16	10.5699	10.5047	10.6325	10.5211	10.5172	10.4291	10.5011	10.3077	10.3723	10.3271	10.4968
ENSMUSG00000003528	96.8817	0.00793838	0.0627342	0.0620253	0.884541	Slc25a1	solute carrier family 25 (mitochondrial carrier, citrate transporter), member 1	16	10.5599	10.2184	10.3839	10.2987	10.3135	10.0331	10.1708	9.88966	10.1766	10.1272	10.1348
ENSMUSG00000003545	1419.59	-0.00914639	0.060772	0.574062	0.935103	Fosb	FBJ osteosarcoma oncogene B	7	11.4312	11.4186	11.3605	11.2892	11.1628	11.5046	11.137	11.5874	11.4764	11.4223	11.5391
ENSMUSG00000003546	66.7155	-0.000781227	0.0618792	0.883963	0.988057	Klc4	kinesin light chain 4	17	10.1446	10.2481	10.2752	9.9216	10.2436	10.1863	10.0898	10.2219	10.297	9.99468	10.3144
ENSMUSG00000003549	88.0172	0.0013212	0.0620465	0.678777	0.954021	Ercc1	excision repair cross-complementing rodent repair deficiency, complementation group 1	7	9.78477	10.3761	10.5379	9.99703	10.0678	10.3623	10.0606	10.5555	10.1133	10.1523	10.1294
ENSMUSG00000003559	237.717	0.0108733	0.0631747	0.10294	0.935103	As3mt	arsenite methyltransferase	19	11.0638	10.3186	10.6031	10.4816	10.4524	10.5442	10.2441	10.3438	10.6331	10.4389	10.2948
ENSMUSG00000003573	8.05328	-0.000344007	0.0620976	0.857543	0.984027	Homer3	homer scaffolding protein 3	8	9.86812	9.86812	10.0139	9.83053	9.83835	9.73496	9.86812	9.86812	10.0135	9.73496	9.91065
ENSMUSG00000003575	266.503	-0.000715533	0.0618518	0.893971	0.989633	Crtc1	CREB regulated transcription coactivator 1	8	10.7644	10.1185	10.2177	10.9162	10.4448	10.4459	10.4552	10.6907	10.1971	10.8239	10.5049
ENSMUSG00000003581	52.8905	-0.00231304	0.0620657	0.548153	0.935103	Rnf215	ring finger protein 215	11	10.1266	10.0631	10.2549	9.93501	10.1563	10.0335	10.4338	9.8114	9.98638	10.2255	10.1694
ENSMUSG00000003585	20.0426	-0.000609954	0.0621102	0.416155	0.935103	Sec14l2	SEC14-like lipid binding 2	11	9.74032	9.74032	9.92232	9.86276	9.86276	10.0074	10.4215	9.74032	9.99343	9.86276	9.86276
ENSMUSG00000003604	168.385	0.003766	0.0619899	0.530147	0.935103	Aven	apoptosis, caspase activation inhibitor	2	10.1562	10.5028	10.29	10.3885	10.7072	10.3814	10.4589	10.3272	10.4802	9.96105	10.3204
ENSMUSG00000003617	0.693528	0.000705959	0.0621157	0.520021	0.935103	Cp	ceruloplasmin	3	9.85302	9.86713	9.8087	9.89147	9.8087	9.8087	9.79439	9.79439	9.8087	9.8087	9.85568
ENSMUSG00000003623	283.917	0.00939115	0.0615106	0.497098	0.935103	Crot	carnitine O-octanoyltransferase	5	10.7886	10.6067	10.5756	10.6481	10.5583	10.579	10.4128	10.5988	10.5734	10.7028	10.5748
ENSMUSG00000003644	828.255	-0.0189396	0.0632293	0.303561	0.935103	Rps6ka1	ribosomal protein S6 kinase polypeptide 1	4	11.0946	11.2724	10.9785	11.0541	11.0428	11.1152	11.0509	11.1159	11.3929	11.164	11.1864
ENSMUSG00000003660	2474.97	-0.0166109	0.0622821	0.348144	0.935103	Snrnp200	small nuclear ribonucleoprotein 200 (U5)	2	11.876	12.0256	11.8669	11.7202	11.9322	12.1394	11.9638	12.0494	12.1324	11.7503	12.3092
ENSMUSG00000003662	286.014	-0.00137474	0.0619601	0.76127	0.969546	Ciao1	cytosolic iron-sulfur protein assembly 1	2	9.91635	10.9246	10.3895	10.6328	10.3039	10.5795	10.422	10.8319	10.569	10.5609	10.6304
ENSMUSG00000003680	86.0164	-0.00671296	0.0625099	0.116167	0.935103	Taf6l	TATA-box binding protein associated factor 6 like	19	9.87131	10.2292	10.1509	10.196	10.0846	10.2071	10.6635	10.0238	10.5012	10.0736	10.1654
ENSMUSG00000003721	111.839	-0.00568138	0.0622452	0.299657	0.935103	Insig2	insulin induced gene 2	1	10.215	10.1102	10.2006	10.4883	10.2485	10.2059	10.3668	10.4403	9.98764	10.598	10.2525
ENSMUSG00000003731	479.834	-0.00893137	0.0625845	0.244797	0.935103	Kpna6	karyopherin (importin) alpha 6	4	10.9828	10.4826	10.4355	10.6209	10.6728	11.1184	10.68	11.0968	10.6279	10.9093	11.2891
ENSMUSG00000003746	5153.44	0.00390863	0.0566048	0.866898	0.986762	Man1a	mannosidase 1, alpha	10	12.6172	12.6486	12.8438	12.683	12.8312	12.6969	12.6387	12.9377	12.6175	12.7003	12.6012
ENSMUSG00000003752	84.1184	-0.00488601	0.0623185	0.0604724	0.881744	Itpkc	inositol 1,4,5-trisphosphate 3-kinase C	7	9.9509	10.0236	9.96392	10.1136	9.92211	10.3904	10.1385	10.3544	9.80304	10.5263	10.0986
ENSMUSG00000003762	181.799	-0.00410828	0.0615974	0.652223	0.948676	Coq8b	coenzyme Q8B	7	10.644	10.3234	10.491	10.2149	10.4037	10.5129	10.3566	10.4818	10.5863	10.481	10.4703
ENSMUSG00000003778	791.406	0.0108967	0.0624002	0.352879	0.935103	Brd8	bromodomain containing 8	18	10.7523	11.417	11.3545	10.8627	11.0809	11.2297	11.1397	10.9757	10.9612	10.967	11.0422
ENSMUSG00000003779	28.7095	0.00170415	0.062065	0.609588	0.939563	Kif20a	kinesin family member 20A	18	9.86339	10.2152	10.0428	9.96365	10.0995	9.99819	10.093	9.86339	10.133	9.86421	9.95986
ENSMUSG00000003808	195.77	0.000331891	0.0618206	0.96061	0.997739	Farsa	phenylalanyl-tRNA synthetase, alpha subunit	8	10.0718	10.5636	10.6253	10.1977	10.5196	10.4157	10.6156	10.3549	10.3243	10.2637	10.4637
ENSMUSG00000003810	208.59	0.00523644	0.0622756	0.233674	0.935103	Mast2	microtubule associated serine/threonine kinase 2	4	9.84102	10.8516	10.5939	10.6467	10.4194	10.6089	10.795	10.3091	10.4281	10.1952	10.2519
ENSMUSG00000003812	392.245	-0.00299002	0.0617164	0.698129	0.959392	Dnase2a	deoxyribonuclease II alpha	8	10.3497	10.9202	10.5633	10.7091	10.6506	10.8636	10.4619	11.0604	10.476	10.9425	10.6813
ENSMUSG00000003813	388.327	0.00997137	0.0627501	0.217924	0.935103	Rad23a	RAD23 homolog A, nucleotide excision repair protein	8	10.807	11.0432	10.9697	10.7116	10.5573	10.5607	10.253	10.6911	10.662	10.8037	10.6249
ENSMUSG00000003814	5943.22	0.0178914	0.0617027	0.385738	0.935103	Calr	calreticulin	8	13.0179	12.9747	13.0721	12.9214	12.8984	12.549	12.5226	12.9009	12.9121	12.7487	12.8766
ENSMUSG00000003824	34.9664	-0.00154305	0.0620719	0.606889	0.939563	Syce2	synaptonemal complex central element protein 2	8	9.76306	10.238	10.078	9.84002	10.1497	9.99171	10.0737	10.1118	10.3268	9.99529	9.94506
ENSMUSG00000003847	774.056	0.00239878	0.059971	0.872467	0.986858	Nfat5	nuclear factor of activated T cells 5	8	11.2252	10.9355	10.9329	11.1014	11.3198	11.2091	11.2062	11.113	11.0601	11.0879	11.1288
ENSMUSG00000003848	205.95	0.000502095	0.0614524	0.968341	0.998305	Nob1	NIN1/RPN12 binding protein 1 homolog	8	10.4521	10.5985	10.4172	10.7181	10.5275	10.3017	10.5399	10.4232	10.5052	10.6241	10.4301
ENSMUSG00000003865	261.051	-0.0083527	0.062512	0.232673	0.935103	Gys1	glycogen synthase 1, muscle	7	10.5077	10.2253	10.3878	10.7695	10.3532	10.5998	10.4166	11.029	10.5975	10.567	10.5375
ENSMUSG00000003868	347.963	0.00430603	0.0620371	0.460923	0.935103	Ruvbl2	RuvB-like protein 2	7	11.0805	10.8805	10.7871	10.4218	10.6332	10.653	10.1838	10.4754	10.5979	11.1044	10.388
ENSMUSG00000003873	104.477	-0.0244695	0.0676661	0.0794348	0.932339	Bax	BCL2-associated X protein	7	10.2014	10.3518	10.2699	10.2137	10.2189	10.2532	10.3049	10.3021	10.4122	10.329	10.3332
ENSMUSG00000003882	0.722091	0.000396686	0.0621176	0.581314	0.935103	Il7r	interleukin 7 receptor	15	9.78453	9.92059	9.81855	9.81855	9.81855	9.81855	9.78453	9.78453	9.81855	9.81855	9.81855
ENSMUSG00000003923	1003.95	-0.00720623	0.0621902	0.348534	0.935103	Tfam	transcription factor A, mitochondrial	10	11.0698	10.8165	11.1237	11.1608	11.3355	11.4075	10.7977	12.2247	11.2053	11.226	11.1314
ENSMUSG00000003929	106.08	-0.00485298	0.0620899	0.424169	0.935103	Zfp81	zinc finger protein 81	17	10.0724	10.3392	10.2392	10.063	10.3761	10.2725	10.0935	10.538	10.1695	10.3591	10.3459
ENSMUSG00000003948	92.8255	0.00341491	0.0620876	0.462996	0.935103	Mmd	monocyte to macrophage differentiation-associated	11	10.2617	10.3856	10.0381	10.3548	10.3379	10.2176	9.87384	10.3254	10.3162	10.0338	10.1829
ENSMUSG00000003955	139.367	-0.00191692	0.0617072	0.791896	0.973783	Fam162a	family with sequence similarity 162, member A	16	10.6437	10.2081	10.4676	10.3251	10.2647	10.2005	10.3527	10.2445	10.332	10.3664	10.5792
ENSMUSG00000003970	21081.3	0.0127362	0.0542246	0.651247	0.948676	Rpl8	ribosomal protein L8	15	14.6099	14.4579	14.4572	14.5745	14.5482	14.3878	14.3331	14.5444	14.5834	14.4282	14.4247
ENSMUSG00000004018	129.694	-0.00177487	0.062082	0.471233	0.935103	Fancl	Fanconi anemia, complementation group L	11	9.8546	10.2316	10.3146	10.0613	10.2542	10.5133	9.97572	10.917	9.96612	10.4415	10.162
ENSMUSG00000004031	1.10986	-0.000960373	0.0621269	0.285615	0.935103	Brinp2	bone morphogenic protein/retinoic acid inducible neural-specific 2	1	9.81359	9.81359	9.78949	9.78949	9.78949	9.78949	9.81359	9.81359	9.95814	9.78949	9.78949
ENSMUSG00000004035	1.37669	-0.000969317	0.0621272	0.24486	0.935103	Gstm7	glutathione S-transferase, mu 7	3	9.81495	9.81495	9.78813	9.78813	9.78813	9.78813	9.81495	9.81495	9.78813	9.78813	9.97593
ENSMUSG00000004040	1236.74	0.0116053	0.0627455	0.28435	0.935103	Stat3	signal transducer and activator of transcription 3	11	11.8621	11.2778	11.1536	11.8465	11.1826	11.3326	11.3144	11.0236	11.3438	11.1517	11.5756
ENSMUSG00000004043	213.893	0.0056152	0.061951	0.481954	0.935103	Stat5a	signal transducer and activator of transcription 5A	11	10.6463	10.2311	10.5921	10.5819	10.5615	10.5105	10.6625	10.4126	10.4943	10.1974	10.4793
ENSMUSG00000004054	311.951	-0.00815272	0.0621182	0.407141	0.935103	Map3k11	mitogen-activated protein kinase kinase kinase 11	19	10.8837	10.3866	10.688	10.4809	10.574	10.6504	10.7036	10.6205	10.5144	10.9518	10.6808
ENSMUSG00000004056	567.677	-0.00456567	0.0616821	0.612005	0.939564	Akt2	thymoma viral proto-oncogene 2	7	10.3446	11.2606	10.8469	10.861	10.8182	10.9798	10.8929	11.1165	10.7625	11.033	11.0241
ENSMUSG00000004069	369.246	0.0048143	0.0608122	0.715968	0.963126	Dnaja3	DnaJ heat shock protein family (Hsp40) member A3	16	10.7704	10.7443	10.5228	10.8251	10.7454	10.6392	10.7037	10.5616	10.6668	10.6044	10.8612
ENSMUSG00000004070	698.614	-0.00855896	0.0605039	0.60122	0.938271	Hmox2	heme oxygenase 2	16	10.859	10.992	11.1837	11.0953	11.0599	11.024	11.2788	11.1181	11.0844	10.9378	11.0491
ENSMUSG00000004071	272.602	-0.00085994	0.0611878	0.929367	0.993631	Cdip1	cell death inducing Trp53 target 1	16	10.7876	10.453	10.5595	10.7058	10.4268	10.3989	10.5066	10.5154	10.7353	10.538	10.5952
ENSMUSG00000004085	71.8532	-0.0055873	0.0623091	0.243023	0.935103	Map3k20	mitogen-activated protein kinase kinase kinase 20	2	10.1919	10.1017	10.2644	10.1642	10.155	9.96109	9.89247	10.5529	10.341	10.2522	10.1554
ENSMUSG00000004096	804.789	-0.0292296	0.0692641	0.0689859	0.919661	Cwc15	CWC15 spliceosome-associated protein	9	10.9422	10.9773	11.2055	11.1427	11.1017	11.0528	11.461	11.2135	11.0307	11.2124	11.2936
ENSMUSG00000004098	1.48395	-0.000315912	0.0621151	0.775192	0.970764	Col5a3	collagen, type V, alpha 3	9	9.78714	9.96523	9.81594	9.81594	9.81594	9.81594	9.78714	9.78714	9.85951	9.81594	9.88238
ENSMUSG00000004099	639.199	-0.00743357	0.0617523	0.494176	0.935103	Dnmt1	DNA methyltransferase (cytosine-5) 1	9	10.7565	10.9791	11.2114	10.6571	11.1254	10.7517	10.8679	11.2293	10.8356	11.0664	11.0595
ENSMUSG00000004100	248.218	-0.0080178	0.0617034	0.492711	0.935103	Ppan	peter pan homolog	9	10.5166	10.4714	10.3305	10.6068	10.4599	10.677	10.5235	10.6335	10.4448	10.5398	10.695
ENSMUSG00000004105	16.4164	0.000655838	0.0621212	0.43702	0.935103	Angptl2	angiopoietin-like 2	2	10.2897	9.94755	9.90723	9.90723	9.90723	9.90723	9.69585	9.69585	9.90723	9.90723	9.90723
ENSMUSG00000004110	1625.12	-0.000248035	0.0613166	0.974099	0.998814	Cacna1e	calcium channel, voltage-dependent, R type, alpha 1E subunit	1	10.9014	11.7315	11.6746	11.9464	11.6435	11.2973	11.8879	11.6583	11.3404	11.5223	11.3891
ENSMUSG00000004127	158.621	-0.00542407	0.0623699	0.136338	0.935103	Trmt10a	tRNA methyltransferase 10A	3	10.3113	9.78639	10.3213	10.514	10.1789	10.0406	10.2863	10.9067	10.7209	10.0513	10.4318
ENSMUSG00000004187	8.85236	-0.000418404	0.0620982	0.683551	0.955469	Kifc2	kinesin family member C2	15	9.84513	9.84513	9.86109	9.92343	10.0815	9.75795	10.0247	9.84513	9.80152	9.96536	9.83932
ENSMUSG00000004207	7801.81	-0.0124974	0.0527484	0.635989	0.945707	Psap	prosaposin	10	13.1998	13.2021	13.0909	13.2407	13.1852	13.0861	13.1791	13.1551	13.3306	13.14	13.2146
ENSMUSG00000004221	424.527	-0.000576046	0.0613378	0.947905	0.995781	Ikbkg	inhibitor of kappaB kinase gamma	X	10.4186	11.0223	11.0401	10.8031	10.6286	10.5587	10.845	10.769	10.7137	10.7809	10.8211
ENSMUSG00000004231	2.49025	-0.000556213	0.0621197	0.548851	0.935103	Pax2	paired box 2	19	9.76999	9.76999	9.8331	9.8331	9.8331	9.8331	9.76999	10.0224	9.8331	9.8331	9.8331
ENSMUSG00000004233	105.27	0.00506413	0.0622972	0.191873	0.935103	Wars2	tryptophanyl tRNA synthetase 2 (mitochondrial)	3	9.95704	10.7581	10.0864	10.1916	10.2851	10.4141	10.0267	10.1577	10.0671	10.1551	10.3747
ENSMUSG00000004263	115.846	-0.000875588	0.0620235	0.78076	0.97236	Atn1	atrophin 1	6	10.6061	10.3208	10.082	10.2369	10.4642	9.88016	9.96494	10.2313	10.2829	10.54	10.4794
ENSMUSG00000004264	835.115	0.00617217	0.0595406	0.733346	0.967379	Phb2	prohibitin 2	6	11.3983	11.0566	11.1138	11.0835	11.2178	11.1296	11.106	11.0549	11.0894	11.191	11.2523
ENSMUSG00000004266	4589.92	0.0439009	0.0760963	0.106295	0.935103	Ptpn6	protein tyrosine phosphatase, non-receptor type 6	6	12.8446	12.6193	12.7787	12.8588	12.5856	12.5499	12.3807	12.6703	12.4723	12.6075	12.5482
ENSMUSG00000004268	315.913	-0.00274647	0.0609645	0.818762	0.976392	Emg1	EMG1 N1-specific pseudouridine methyltransferase	6	10.6224	10.6506	10.791	10.4398	10.4802	10.7113	10.6842	10.5508	10.7893	10.6571	10.5205
ENSMUSG00000004270	112.579	0.00439609	0.061986	0.49452	0.935103	Lpcat3	lysophosphatidylcholine acyltransferase 3	6	10.1629	10.566	10.0406	10.4086	10.3041	10.2802	10.2102	10.1761	10.3296	10.2728	10.3157
ENSMUSG00000004285	436.837	0.00398716	0.0610037	0.742667	0.968398	Atp6v1f	ATPase, H+ transporting, lysosomal V1 subunit F	6	10.9969	10.747	10.7053	10.8648	10.8581	10.6456	10.8986	10.5013	10.8342	10.8085	10.7854
ENSMUSG00000004317	217.147	0.00249308	0.061789	0.687443	0.956888	Clcn5	chloride channel, voltage-sensitive 5	X	10.3331	10.8078	10.3624	10.555	10.5355	10.3728	10.2698	10.4633	10.7754	10.1911	10.487
ENSMUSG00000004319	871.493	0.00156758	0.0603825	0.801372	0.974288	Clcn3	chloride channel, voltage-sensitive 3	8	10.8614	11.2486	11.1848	11.1321	11.2467	11.2283	11.3629	11.0704	10.9858	11.0474	11.1256
ENSMUSG00000004328	23.9762	-0.00330214	0.0622167	0.0400512	0.80739	Hif3a	hypoxia inducible factor 3, alpha subunit	7	9.85209	9.85209	9.92454	9.92971	9.7932	10.0326	9.85209	10.2819	9.82645	9.98922	10.2211
ENSMUSG00000004347	25.7499	-0.00212973	0.0620885	0.450976	0.935103	Pde1c	phosphodiesterase 1C	6	9.78826	10.0002	10.1	9.9998	9.9182	10.0964	10.0179	10.2547	9.89027	9.95247	10.1496
ENSMUSG00000004356	567.365	0.00127871	0.0609511	0.922769	0.992787	Utp20	UTP20 small subunit processome component	10	11.1955	10.8717	10.922	10.9688	10.8362	10.9174	11.0973	10.5765	10.9709	11.1268	10.8047
ENSMUSG00000004359	27.7576	-0.000173416	0.0619084	0.968342	0.998305	Spic	Spi-C transcription factor (Spi-1/PU.1 related)	10	9.94318	10.0659	9.94897	10.0483	10.0691	10.0752	10.0315	10.035	10.1812	9.86734	9.942
ENSMUSG00000004364	925.96	0.00896592	0.0612293	0.530462	0.935103	Cul3	cullin 3	1	11.3939	11.4449	11.2606	11.1422	11.0086	11.3655	11.0814	11.0028	11.3518	11.3314	11.1552
ENSMUSG00000004383	3.37266	-0.000194871	0.0621076	0.883861	0.988057	Large1	LARGE xylosyl- and glucuronyltransferase 1	8	9.83696	9.83696	9.76612	9.76612	9.89272	9.91781	9.83696	9.83696	9.98376	9.76612	9.76612
ENSMUSG00000004393	171.392	0.00611014	0.0621625	0.394811	0.935103	Ddx56	DEAD box helicase 56	11	10.6966	10.1774	10.5102	10.255	10.3533	10.3545	10.3707	10.2233	10.4102	10.3811	10.3046
ENSMUSG00000004394	232.97	-0.00700279	0.062182	0.37017	0.935103	Tmed4	transmembrane p24 trafficking protein 4	11	10.4378	10.781	10.5708	10.394	10.5073	10.328	10.3586	10.556	10.8619	10.4235	10.6481
ENSMUSG00000004446	865.341	-0.0256332	0.0668728	0.151351	0.935103	Bid	BH3 interacting domain death agonist	6	11.0539	10.9851	11.2525	11.2775	11.1558	10.9266	11.3547	11.2956	11.186	11.2354	11.1723
ENSMUSG00000004451	136.778	-0.00408673	0.0616429	0.653178	0.948727	Ralb	v-ral simian leukemia viral oncogene B	1	10.2406	10.4902	10.4942	10.2444	10.2711	10.1937	10.3817	10.2666	10.3904	10.3369	10.4828
ENSMUSG00000004455	782.481	0.00885016	0.0612221	0.541782	0.935103	Ppp1cc	protein phosphatase 1 catalytic subunit gamma	5	11.3993	10.9103	11.2242	10.9877	11.165	11.1471	10.8836	11.2534	11.1028	11.0982	11.0567
ENSMUSG00000004460	652.847	-0.0253696	0.0657782	0.204237	0.935103	Dnajb11	DnaJ heat shock protein family (Hsp40) member B11	16	10.9896	10.8871	11.0747	10.9614	10.8842	10.9625	10.9509	11.1776	11.0866	10.9272	11.1125
ENSMUSG00000004462	97.0441	-0.00190763	0.0619122	0.69762	0.959373	Tbccd1	TBCC domain containing 1	16	9.97847	10.2312	10.1718	10.1461	10.4265	10.3611	10.3315	10.4057	10.2492	10.1388	10.1632
ENSMUSG00000004473	35.9664	-0.00379288	0.0621927	0.279561	0.935103	Clec11a	C-type lectin domain family 11, member a	7	10.1098	9.91277	10.03	9.87689	10.1112	9.91886	10.2509	9.86133	10.2546	10.098	9.94638
ENSMUSG00000004500	126.069	0.00146944	0.0620336	0.635327	0.945707	Zfp324	zinc finger protein 324	7	10.8191	10.1095	10.1673	10.0588	10.3016	10.1718	9.98524	10.1209	10.3002	10.3587	10.4523
ENSMUSG00000004508	1.33178	0.000683913	0.0621214	0.316006	0.935103	Gab2	growth factor receptor bound protein 2-associated protein 2	7	9.82016	9.82016	9.92255	9.78292	9.78292	9.90395	9.82016	9.82016	9.78292	9.78292	9.78292
ENSMUSG00000004530	418.438	0.0113864	0.0629657	0.225326	0.935103	Coro1c	coronin, actin binding protein 1C	5	11.177	10.5341	10.6416	11.102	10.8367	10.5783	10.5327	10.7689	10.6245	10.7613	10.7276
ENSMUSG00000004535	1833.78	0.00856902	0.0606611	0.637086	0.945983	Tax1bp1	Tax1 (human T cell leukemia virus type I) binding protein 1	6	11.5724	11.7673	12.132	11.7732	11.7768	11.564	11.7247	11.916	11.6752	11.5701	11.7244
ENSMUSG00000004542	1.36956	-0.000963253	0.0621214	0.323398	0.935103	Psg19	pregnancy specific glycoprotein 19	7	9.79031	9.79031	9.81277	9.81277	9.81277	9.85852	9.95277	9.79031	9.81277	9.81277	9.89414
ENSMUSG00000004552	106.332	0.00326079	0.0621429	0.288602	0.935103	Ctse	cathepsin E	1	10.6363	10.615	10.145	10.1864	10.268	10.2964	10.0176	9.70691	10.2157	10.2276	10.3686
ENSMUSG00000004561	105.016	-0.0155076	0.0647461	0.00968108	0.553983	Mettl17	methyltransferase like 17	14	10.0365	10.1469	10.094	10.3059	10.0179	10.126	10.4406	10.2232	10.5534	10.2202	10.1651
ENSMUSG00000004562	1.83921	0.0010406	0.0621266	0.314636	0.935103	Arhgef40	Rho guanine nucleotide exchange factor (GEF) 40	14	9.78152	9.96688	9.82156	9.82156	9.88126	9.9008	9.8357	9.78152	9.82156	9.82156	9.82156
ENSMUSG00000004565	278.427	0.00204949	0.0617741	0.772248	0.970758	Pnpla6	patatin-like phospholipase domain containing 6	8	10.3731	10.7158	10.334	10.8251	10.5903	10.2358	10.2778	10.6355	10.3196	10.7603	10.4389
ENSMUSG00000004567	167.84	0.00310184	0.0619424	0.595288	0.936825	Mcoln1	mucolipin 1	8	10.7547	10.2027	10.5135	10.2668	10.2544	10.2936	10.2904	10.2062	10.6725	10.3128	10.2309
ENSMUSG00000004568	893.176	-0.0069479	0.0618909	0.468407	0.935103	Arhgef18	rho/rac guanine nucleotide exchange factor (GEF) 18	8	11.3289	11.0175	10.8272	10.9805	11.2671	11.0864	11.4723	10.7026	11.0327	11.1441	11.5742
ENSMUSG00000004591	623.558	0.00919696	0.062582	0.248688	0.935103	Pkn2	protein kinase N2	3	11.2345	11.3103	11.093	10.5822	11.0508	10.8089	10.7598	10.4143	10.9849	11.0224	10.9659
ENSMUSG00000004609	6.91539	-0.000544942	0.0621086	0.725978	0.966042	Cd33	CD33 antigen	7	9.85541	9.85541	9.74767	9.88281	9.74767	9.95214	9.85541	9.85541	9.74767	9.8307	10.0792
ENSMUSG00000004610	423.13	-0.00349559	0.0603745	0.807238	0.97478	Etfb	electron transferring flavoprotein, beta polypeptide	7	10.7305	10.7371	11.0088	10.6943	10.7215	10.7688	10.9383	10.7523	10.7319	10.827	10.7746
ENSMUSG00000004626	450.305	-0.0118418	0.0627621	0.269269	0.935103	Stxbp2	syntaxin binding protein 2	8	10.7488	10.6563	10.7481	10.852	10.8085	10.7809	10.6152	11.2353	11.0848	10.6943	10.7289
ENSMUSG00000004633	39.476	-0.00866505	0.0628748	0.0514785	0.852077	Chn2	chimerin 2	6	9.84762	10.1336	9.98203	9.9139	9.91334	10.0618	10.0641	10.1843	10.1742	10.3121	10.0446
ENSMUSG00000004637	101.288	-0.00175491	0.0617248	0.805005	0.97478	Wwox	WW domain-containing oxidoreductase	8	10.3574	10.2361	10.0989	10.2041	10.3967	10.1804	10.204	10.2245	10.0681	10.4541	10.3864
ENSMUSG00000004642	394.719	0.000879952	0.0614355	0.896432	0.989676	Slbp	stem-loop binding protein	5	10.718	10.9963	10.4252	10.7068	10.6516	10.8434	10.6437	10.5084	11.0469	10.7581	10.5841
ENSMUSG00000004651	1.40753	-0.000547445	0.0621195	0.56577	0.935103	Tyr	tyrosinase	7	9.7778	9.7778	9.82528	9.82528	9.82528	9.82528	9.7778	9.9677	9.82528	9.82528	9.82528
ENSMUSG00000004655	0.780426	0.000718085	0.0621217	0.414186	0.935103	Aqp1	aquaporin 1	6	9.81446	9.81446	9.92175	9.83641	9.78862	9.78862	9.81446	9.81446	9.78862	9.78862	9.78862
ENSMUSG00000004661	579.768	0.012551	0.06298	0.247734	0.935103	Arid3b	AT rich interactive domain 3B (BRIGHT-like)	9	11.1202	10.635	10.892	10.8978	11.195	11.055	11.0743	10.7858	10.6624	10.9094	10.7151
ENSMUSG00000004665	1540.48	0.0198343	0.0652731	0.0930189	0.935103	Cnn2	calponin 2	10	11.6701	11.9871	11.6045	11.9457	11.4664	11.3696	11.4627	11.121	11.5894	11.6098	11.3361
ENSMUSG00000004667	282.55	-0.00571878	0.0601416	0.724345	0.965664	Polr2e	polymerase (RNA) II (DNA directed) polypeptide E	10	10.5581	10.6704	10.6607	10.5966	10.5168	10.5299	10.6093	10.555	10.5284	10.6344	10.7204
ENSMUSG00000004677	556.719	-0.0375676	0.0763207	0.0441203	0.83259	Myo9b	myosin IXb	8	10.7621	10.8217	10.8019	10.7959	10.9457	10.9903	10.9038	11.2238	10.9324	11.0592	10.9696
ENSMUSG00000004698	519.537	-0.0309602	0.0706671	0.0883137	0.935103	Hdac9	histone deacetylase 9	12	10.6695	10.8805	10.8641	10.8063	10.6475	10.9227	11.0038	10.8894	10.8748	11.0087	10.9015
ENSMUSG00000004707	1300.85	-0.033365	0.07183	0.0925374	0.935103	Ly9	lymphocyte antigen 9	1	11.3448	11.1773	11.6266	11.4786	11.3307	11.3569	11.5849	11.7725	11.4755	11.5244	11.4962
ENSMUSG00000004709	11.5678	-0.00129122	0.0621175	0.226062	0.935103	Cd244a	CD244 molecule A	1	9.81587	9.81587	9.78721	10.0486	9.88159	9.78721	9.81587	10.1838	9.94422	9.99462	9.91148
ENSMUSG00000004730	58.4051	0.000727751	0.0619354	0.885063	0.988057	Adgre1	adhesion G protein-coupled receptor E1	17	10.0801	10.0888	10.2288	10.2217	10.0461	9.78491	9.96281	10.1453	10.0829	10.0264	10.0939
ENSMUSG00000004748	14.9762	0.00201583	0.0621265	0.387861	0.935103	Mtfp1	mitochondrial fission process 1	11	10.0594	9.83253	10.1319	9.77055	10.0914	9.86205	10.0201	9.83253	9.95008	9.89507	9.85192
ENSMUSG00000004768	81.0522	-0.00343794	0.0621728	0.139331	0.935103	Rab23	RAB23, member RAS oncogene family	1	9.84244	9.98788	10.2441	10.0771	10.1395	10.2913	10.6821	10.1709	10.0831	10.1865	10.1742
ENSMUSG00000004771	327.633	0.0127689	0.0631721	0.209429	0.935103	Rab11a	RAB11A, member RAS oncogene family	9	10.8319	10.4483	10.669	10.9883	10.6965	10.6696	10.6701	10.7577	10.5304	10.5264	10.6587
ENSMUSG00000004788	280.121	0.00969059	0.0629402	0.112043	0.935103	Eif2b2	eukaryotic translation initiation factor 2B, subunit 2 beta	12	11.0878	10.5716	10.526	10.8545	10.451	10.4803	10.1083	10.4411	10.3403	10.4481	10.7653
ENSMUSG00000004789	990.104	-0.0277179	0.0669312	0.178695	0.935103	Dlst	dihydrolipoamide S-succinyltransferase (E2 component of 2-oxo-glutarate complex)	12	11.3618	11.0422	11.3143	11.1386	11.0797	11.2863	11.3048	11.3256	11.3675	11.2763	11.3475
ENSMUSG00000004798	340.253	-0.012504	0.0634398	0.132166	0.935103	Ulk2	unc-51 like kinase 2	11	10.5521	10.6991	10.4848	10.7446	10.6054	10.4348	10.2366	11.1594	10.7465	10.8666	10.75
ENSMUSG00000004815	244.135	1.52249	0.793598	0.000554543	0.0989316	Dgkq	diacylglycerol kinase, theta	5	11.1758	10.7209	10.7034	10.7295	10.3467	10.5063	9.93658	10.1037	10.2484	10.3789	10.4766
ENSMUSG00000004837	990.774	0.00624124	0.0608482	0.661308	0.950135	Grap	GRB2-related adaptor protein	11	11.0481	11.6307	11.2463	11.4733	11.1051	11.1572	11.1126	11.2463	11.2824	11.2451	11.3068
ENSMUSG00000004843	416.317	-0.00332662	0.0603862	0.816895	0.976392	Chmp2b	charged multivesicular body protein 2B	16	10.7412	10.8343	10.7542	10.9501	10.7442	10.644	10.8396	10.7294	10.6863	10.9266	10.7975
ENSMUSG00000004846	57.9323	-0.0122174	0.0636952	0.0115847	0.585573	Plod3	procollagen-lysine, 2-oxoglutarate 5-dioxygenase 3	5	9.92503	9.9783	10.0711	10.1736	10.0338	10.177	10.3163	10.3473	10.0966	10.2877	10.1522
ENSMUSG00000004865	617.975	-0.0155884	0.0640778	0.128367	0.935103	Srpk1	serine/arginine-rich protein specific kinase 1	17	10.5923	10.7658	10.7214	11.0905	10.8489	11.124	11.3373	11.1036	11.0882	10.8554	10.9198
ENSMUSG00000004880	1282.12	0.0214105	0.065893	0.127844	0.935103	Lbr	lamin B receptor	1	11.6955	11.2623	11.43	11.6966	11.7631	11.142	11.2137	11.4749	11.3836	11.236	11.2299
ENSMUSG00000004892	1.75365	0.00047361	0.0621186	0.545374	0.935103	Bcan	brevican	3	9.77505	9.98697	9.82803	9.82803	9.82803	9.82803	9.77505	9.77505	9.82803	9.82803	9.82803
ENSMUSG00000004894	1.65049	0.000472619	0.0621186	0.547245	0.935103	Hapln2	hyaluronan and proteoglycan link protein 2	3	9.77584	9.98144	9.82724	9.82724	9.82724	9.82724	9.77584	9.77584	9.82724	9.82724	9.82724
ENSMUSG00000004895	242.562	-0.00418619	0.060779	0.749949	0.969372	Prcc	papillary renal cell carcinoma (translocation-associated)	3	10.4865	10.4559	10.3861	10.552	10.4969	10.6769	10.6363	10.4921	10.5012	10.4532	10.5576
ENSMUSG00000004896	110.462	0.00945894	0.0630381	0.0413284	0.816372	Rrnad1	ribosomal RNA adenine dimethylase domain containing 1	3	10.4522	10.2863	9.95482	10.134	10.7645	10.4828	10.1411	10.1747	10.1842	10.1302	10.1945
ENSMUSG00000004897	619.112	-0.00697608	0.0613288	0.519752	0.935103	Hdgf	heparin binding growth factor	3	10.7518	10.8811	10.9024	11.1022	10.8566	11.1049	11.017	11.2049	11.1437	10.7897	10.8465
ENSMUSG00000004902	2.59212	0.000447813	0.0621131	0.697207	0.959373	Slc25a18	solute carrier family 25 (mitochondrial carrier), member 18	6	9.82603	9.82603	9.77705	9.77705	9.77705	10.0101	9.82603	9.82603	9.77705	9.88687	9.77705
ENSMUSG00000004929	53.0273	0.000368752	0.0620298	0.914258	0.991262	Thop1	thimet oligopeptidase 1	10	9.98818	10.3505	10.1125	10.1179	9.95868	9.95394	9.88663	10.0837	10.4226	9.95105	10.024
ENSMUSG00000004931	91.2201	-0.00344418	0.0621442	0.364108	0.935103	Apba3	amyloid beta (A4) precursor protein-binding, family A, member 3	10	10.0578	10.4126	10.2456	9.92045	10.2384	10.0952	10.5707	9.78948	10.2562	10.2776	10.4199
ENSMUSG00000004933	122.032	-0.00653794	0.0623874	0.220715	0.935103	Matk	megakaryocyte-associated tyrosine kinase	10	10.3779	9.89912	10.1664	10.1653	10.4612	10.2326	10.4548	10.4709	10.4593	10.2479	10.3722
ENSMUSG00000004934	287.634	0.00810901	0.0623722	0.306057	0.935103	Pias4	protein inhibitor of activated STAT 4	10	10.4131	10.7993	11.047	10.5249	10.4579	10.5813	10.7714	10.383	10.5564	10.5084	10.4663
ENSMUSG00000004936	979.639	0.00907916	0.0615051	0.50537	0.935103	Map2k1	mitogen-activated protein kinase kinase 1	9	11.0292	11.5441	11.1056	11.1675	11.2529	11.4235	11.3589	10.9465	11.2589	11.1643	11.165
ENSMUSG00000004937	248.561	0.0164712	0.0645738	0.0984331	0.935103	Sgta	small glutamine-rich tetratricopeptide repeat (TPR)-containing, alpha	10	10.8369	10.3621	10.4986	10.5736	10.6086	10.7997	10.52	10.4797	10.4839	10.3264	10.5571
ENSMUSG00000004945	121.754	-0.0101935	0.0629019	0.173465	0.935103	Tmem242	transmembrane protein 242	17	10.1426	10.3106	10.0225	10.204	10.3452	10.4321	10.4598	10.3052	10.458	10.4029	10.2671
ENSMUSG00000004947	147.782	0.00350247	0.061855	0.624343	0.943149	Dtx2	deltex 2, E3 ubiquitin ligase	5	10.6731	10.1259	10.5566	10.2016	10.3064	10.3966	10.401	10.2578	10.3039	10.4831	10.3028
ENSMUSG00000004952	23.3283	-0.000201701	0.0621026	0.827059	0.976517	Rasa4	RAS p21 protein activator 4	5	9.86331	10.2038	9.73977	9.73977	10.0064	9.93906	9.86331	9.86331	10.2303	9.97437	10.0093
ENSMUSG00000004980	3801.8	-0.0343414	0.0659956	0.320984	0.935103	Hnrnpa2b1	heterogeneous nuclear ribonucleoprotein A2/B1	6	12.2946	12.3035	12.4401	12.2697	12.3965	12.4329	12.6064	12.3757	12.5248	12.3379	12.3635
ENSMUSG00000004994	101.544	-0.00227739	0.0619524	0.73156	0.967175	Ccdc130	coiled-coil domain containing 130	8	9.96067	10.3449	10.5104	10.254	10.1095	10.1387	10.428	10.2435	10.4204	10.0833	10.1937
ENSMUSG00000004996	158.605	-0.00148995	0.0619161	0.749757	0.969372	Mri1	methylthioribose-1-phosphate isomerase 1	8	10.0737	10.351	10.6033	10.1371	10.481	10.4332	10.8609	10.2063	10.3428	10.2709	10.3426
ENSMUSG00000005034	1320.98	-0.0357711	0.073895	0.058689	0.876468	Prkacb	protein kinase, cAMP dependent, catalytic, beta	3	11.3134	11.2691	11.2892	11.5581	11.5824	11.2355	11.7168	11.5709	11.4312	11.5246	11.6518
ENSMUSG00000005043	345.405	-0.00973859	0.0630322	0.0312665	0.769901	Sgsh	N-sulfoglucosamine sulfohydrolase (sulfamidase)	11	10.0191	10.3151	10.5077	10.4018	10.5715	10.8805	11.201	10.9398	10.7636	10.5273	10.6789
ENSMUSG00000005045	1.09189	-0.0010852	0.0621235	0.432317	0.935103	Chd5	chromodomain helicase DNA binding protein 5	4	9.81457	9.81457	9.78851	9.8363	9.83073	9.78851	9.81457	9.86727	9.78851	9.92616	9.83549
ENSMUSG00000005054	116.306	0.0171229	0.0643486	0.16321	0.935103	Cstb	cystatin B	10	10.3578	10.4153	10.4573	10.2853	10.3792	10.3081	10.2366	10.3261	10.3087	10.247	10.3521
ENSMUSG00000005057	11.8506	-8.71899e-05	0.0621074	0.904426	0.990764	Sh2b2	SH2B adaptor protein 2	5	9.8132	9.8132	9.78988	9.78988	10.0532	10.0602	10.1757	9.8132	9.83345	9.86179	9.9384
ENSMUSG00000005069	243.294	-0.0154891	0.0647894	0.0034798	0.330748	Pex5	peroxisomal biogenesis factor 5	6	10.1898	9.9169	10.3679	10.5539	10.4148	10.3255	10.5578	11.2565	10.7637	10.3188	10.6171
ENSMUSG00000005078	64.3655	-0.0132329	0.0639886	0.0222499	0.7207	Jkamp	JNK1/MAPK8-associated membrane protein	12	10.0348	10.0874	10.121	10.0657	10.0574	10.1351	10.3009	10.1835	10.1948	9.94819	10.5394
ENSMUSG00000005087	906.803	0.0184074	0.0637807	0.255943	0.935103	Cd44	CD44 antigen	2	11.2878	11.1833	11.0587	11.1189	11.3398	11.3098	11.2979	10.8782	11.0489	11.1667	11.0897
ENSMUSG00000005102	229.339	-0.0106124	0.0621549	0.383562	0.935103	Eif2ak4	eukaryotic translation initiation factor 2 alpha kinase 4	2	10.4224	10.4581	10.5627	10.5133	10.2752	10.6285	10.5853	10.5671	10.574	10.5119	10.4922
ENSMUSG00000005103	3139.92	0.00967526	0.0600018	0.517787	0.935103	Wdr1	WD repeat domain 1	5	12.432	12.1773	12.2446	12.168	12.3656	12.1563	11.829	12.4209	12.0872	12.2788	12.2032
ENSMUSG00000005107	105.78	0.0139404	0.0641453	0.0329832	0.775045	Slc2a9	solute carrier family 2 (facilitated glucose transporter), member 9	5	10.4376	10.3895	10.2025	10.5993	10.4239	10.1341	10.2695	10.0518	10.2133	10.2142	10.2227
ENSMUSG00000005125	5.77984	-5.47586e-05	0.0621105	0.882668	0.987779	Ndrg1	N-myc downstream regulated gene 1	15	9.81645	9.81645	9.78663	9.89348	9.78663	10.0682	10.004	9.81645	9.78663	9.78663	9.93514
ENSMUSG00000005142	879.313	-0.0171889	0.0645094	0.126628	0.935103	Man2b1	mannosidase 2, alpha B1	8	10.5904	11.19	11.1423	11.2743	11.0854	10.9874	11.4583	11.3679	11.1919	11.1314	11.2489
ENSMUSG00000005148	9.48425	0.00081467	0.0620812	0.72795	0.966481	Klf5	Kruppel-like factor 5	14	9.8206	10.0561	9.78248	9.87806	9.91593	10.045	9.95327	9.8206	9.99125	9.824	9.95179
ENSMUSG00000005150	27.5381	0.000806329	0.0620584	0.759573	0.969546	Wdr83	WD repeat domain containing 83	8	9.87073	10.2262	9.99501	9.94051	9.80546	10.1003	10.014	9.87073	9.94112	10.0934	10.0923
ENSMUSG00000005161	454.851	0.00495077	0.0611481	0.687226	0.956732	Prdx2	peroxiredoxin 2	8	11.1054	10.6061	10.6514	10.7248	10.7983	10.9816	10.7076	10.7812	10.8031	10.8002	10.841
ENSMUSG00000005198	3476.16	-0.0133224	0.0615403	0.434212	0.935103	Polr2a	polymerase (RNA) II (DNA directed) polypeptide A	11	12.1411	12.4657	12.7008	12.15	12.0634	12.0881	12.4332	12.2763	12.3719	12.5404	12.389
ENSMUSG00000005204	328.209	0.0209202	0.066156	0.0861673	0.935103	Senp3	SUMO/sentrin specific peptidase 3	11	10.9379	10.6503	10.6207	10.7935	10.6605	10.7049	10.3387	10.6941	10.6466	10.5928	10.5679
ENSMUSG00000005225	57.8798	0.00070923	0.0620668	0.74989	0.969372	Plekha8	pleckstrin homology domain containing, family A (phosphoinositide binding specific) member 8	6	9.88645	10.6277	9.87841	10.1823	10.0138	10.0417	10.023	9.82781	10.1984	10.1569	10.1672
ENSMUSG00000005233	17.4108	0.000117478	0.0620574	0.965994	0.998286	Spc25	SPC25, NDC80 kinetochore complex component, homolog (S. cerevisiae)	2	9.85051	10.1365	9.81213	9.98646	10.0258	9.83181	9.85051	9.97957	9.94235	10.0941	9.98723
ENSMUSG00000005237	5.3215	-0.000198117	0.0621115	0.910266	0.991262	Dnah2	dynein, axonemal, heavy chain 2	11	9.73708	9.95513	9.866	9.866	9.866	9.866	9.73708	10.0347	9.866	9.866	9.866
ENSMUSG00000005262	167.453	0.0052848	0.0619616	0.485677	0.935103	Ufd1	ubiquitin recognition factor in ER-associated degradation 1	16	10.2497	10.4657	10.3333	10.6619	10.4761	10.397	10.2455	10.6361	10.2955	10.3601	10.2709
ENSMUSG00000005267	78.0716	0.0009487	0.0620549	0.69006	0.957674	Zfp287	zinc finger protein 287	11	10.2114	10.4586	10.03	10.14	10.0527	10.0046	9.92456	9.97726	10.2263	10.3715	10.1755
ENSMUSG00000005299	620.885	-0.0025665	0.0611758	0.814313	0.976078	Letm1	leucine zipper-EF-hand containing transmembrane protein 1	5	11.0418	11.0197	11.2642	10.6284	10.8779	10.934	10.7127	11.1324	11.1187	11.0146	10.9986
ENSMUSG00000005312	1184.79	0.0117201	0.0619917	0.410105	0.935103	Ubqln1	ubiquilin 1	13	11.5995	11.4121	11.7767	11.2476	11.3248	11.3055	11.2773	11.299	11.5891	11.1809	11.3539
ENSMUSG00000005354	647.996	-0.00697838	0.0607833	0.648684	0.948441	Txn2	thioredoxin 2	15	10.8074	11.0751	11.1207	10.9986	10.8194	11.0094	11.1762	10.9098	10.9498	11.1464	10.9005
ENSMUSG00000005360	28.3864	0.00244987	0.0621823	0.0283879	0.754802	Slc1a3	solute carrier family 1 (glial high affinity glutamate transporter), member 3	15	9.84059	10.221	9.76249	10.4676	9.76249	9.92738	9.84059	9.84059	9.95227	9.8212	9.85644
ENSMUSG00000005362	500.458	-0.010896	0.0622908	0.342688	0.935103	Crbn	cereblon	6	10.7999	10.659	10.8592	10.8748	10.9379	10.8499	10.7981	11.2494	10.7444	11.0984	10.7715
ENSMUSG00000005364	41.4064	-0.0068155	0.0624815	0.172224	0.935103	Il5ra	interleukin 5 receptor, alpha	6	10.1963	9.87972	10.0969	9.90872	10.0877	10.1182	10.1021	10.2313	10.1769	10.1709	10.157
ENSMUSG00000005370	463.43	-0.00169471	0.0616453	0.825215	0.976392	Msh6	mutS homolog 6	17	10.7191	11.0465	10.4351	10.6329	10.8254	10.9544	10.3444	11.0033	11.1023	10.6469	10.8514
ENSMUSG00000005371	667.766	-0.0212079	0.0646244	0.220207	0.935103	Fbxo11	F-box protein 11	17	10.9631	11.185	11.0313	11.0469	10.9244	10.8584	11.0537	10.9679	11.1606	11.0623	11.2131
ENSMUSG00000005374	172.971	0.0016037	0.0619619	0.72696	0.966259	Tbl2	transducin (beta)-like 2	5	10.1121	10.7011	10.1972	10.4174	10.1481	10.3829	10.3958	10.0989	10.3486	10.5806	10.214
ENSMUSG00000005378	244.134	-0.00493777	0.0621796	0.325395	0.935103	Bud23	BUD23, rRNA methyltransferase and ribosome maturation factor	5	10.541	9.9818	10.5678	10.2316	10.3733	10.7719	11.0084	10.4624	10.6999	10.5208	10.3235
ENSMUSG00000005397	367.997	-0.00617661	0.0614956	0.576744	0.935103	Nid1	nidogen 1	13	10.6278	10.6336	10.8013	10.5292	10.8422	10.6637	11.0096	10.5529	10.6267	10.6706	10.8082
ENSMUSG00000005410	230.048	-0.0113604	0.0633382	0.0721547	0.923346	Mcm5	minichromosome maintenance complex component 5	8	10.3364	10.284	10.363	10.0921	10.6974	10.4382	10.9506	10.3265	10.661	10.6887	10.3802
ENSMUSG00000005413	100.311	0.00416929	0.0622196	0.198591	0.935103	Hmox1	heme oxygenase 1	8	10.2306	10.2333	10.2697	10.2287	9.81397	10.1898	10.0276	10.0276	10.4475	9.90426	10.0547
ENSMUSG00000005417	450.193	-0.015329	0.0639175	0.105012	0.935103	Mprip	myosin phosphatase Rho interacting protein	11	10.4488	10.5771	10.7938	10.911	10.9073	10.6482	11.1099	11.123	10.8107	10.7895	10.8422
ENSMUSG00000005442	1088.47	-0.0289095	0.0716414	0.00647793	0.460464	Cic	capicua transcriptional repressor	7	10.6881	11.0775	11.3024	10.9261	11.275	11.1968	12.0714	11.3161	11.7362	11.1478	11.4337
ENSMUSG00000005447	78.052	0.00569842	0.0623222	0.217583	0.935103	Pafah1b3	platelet-activating factor acetylhydrolase, isoform 1b, subunit 3	7	10.3034	10.1179	10.414	10.4025	10.1009	10.2615	10.3552	10.0729	9.96535	10.0781	10.2642
ENSMUSG00000005465	110.203	0.00743575	0.0625612	0.16472	0.935103	Il27ra	interleukin 27 receptor, alpha	8	10.3771	10.4597	10.2146	10.3732	10.3922	10.2685	9.90963	10.313	10.073	10.3058	10.2269
ENSMUSG00000005469	237.907	-0.000672279	0.0618161	0.901695	0.990655	Prkaca	protein kinase, cAMP dependent, catalytic, alpha	8	10.06	10.7963	10.5259	10.2421	10.4013	10.5736	10.5011	10.5164	10.48	10.6013	10.455
ENSMUSG00000005470	33.587	0.000199412	0.0620654	0.945895	0.995639	Asf1b	anti-silencing function 1B histone chaperone	8	9.86437	10.1054	9.73871	10.366	9.90213	9.94317	10.1655	9.86437	10.0997	10.0009	9.94865
ENSMUSG00000005481	385.023	-0.000629672	0.0612122	0.958765	0.997619	Ddx39a	DEAD box helicase 39a	8	10.9647	10.5402	10.663	10.6286	10.7084	10.8034	10.498	10.8692	10.8884	10.5322	10.8022
ENSMUSG00000005483	566.622	0.00498445	0.0611712	0.679609	0.954379	Dnajb1	DnaJ heat shock protein family (Hsp40) member B1	8	11.2344	10.6683	10.8721	10.7516	11.1921	10.9643	10.931	10.9116	10.9319	10.9259	10.9162
ENSMUSG00000005501	267.707	-0.00962246	0.062733	0.19868	0.935103	Usp40	ubiquitin specific peptidase 40	1	10.5563	10.1116	10.5694	10.3998	10.7153	10.5775	10.661	10.9695	10.5687	10.463	10.7284
ENSMUSG00000005505	165.845	0.015657	0.0643309	0.0945271	0.935103	Kbtbd4	kelch repeat and BTB (POZ) domain containing 4	2	10.5726	10.507	10.3203	10.3582	10.5043	10.366	10.2834	10.1733	10.3977	10.3261	10.4161
ENSMUSG00000005506	1317.31	0.0111523	0.0633413	0.0474897	0.839017	Celf1	CUGBP, Elav-like family member 1	2	12.694	11.2064	11.7578	11.0326	11.102	11.543	10.4597	10.9153	11.5556	11.1379	11.1032
ENSMUSG00000005510	236.094	0.00714378	0.0623777	0.283398	0.935103	Ndufs3	NADH:ubiquinone oxidoreductase core subunit S3	2	10.3558	10.9737	10.4822	10.5267	10.5063	10.6134	10.0359	10.6474	10.4587	10.4803	10.4548
ENSMUSG00000005514	467.544	0.00276896	0.0616331	0.72931	0.966487	Por	P450 (cytochrome) oxidoreductase	5	11.3477	10.7881	10.765	10.8703	10.5961	10.7445	10.6013	10.5204	10.875	11.1244	10.7253
ENSMUSG00000005533	1.33645	0.000636129	0.0621187	0.478792	0.935103	Igf1r	insulin-like growth factor I receptor	7	9.81768	9.81768	9.7854	9.7854	9.96439	9.7854	9.81768	9.81768	9.7854	9.7854	9.83238
ENSMUSG00000005534	354.424	0.00516696	0.0621965	0.345943	0.935103	Insr	insulin receptor	8	11.3753	10.3157	10.4863	10.4477	10.5559	10.9667	10.1082	10.6922	10.5664	10.7346	10.6025
ENSMUSG00000005540	218.074	-0.000202459	0.0613648	0.980183	0.999188	Fcer2a	Fc receptor, IgE, low affinity II, alpha polypeptide	8	10.6183	10.3568	10.6533	10.2784	10.4852	10.6094	10.6596	10.3886	10.4786	10.4491	10.5869
ENSMUSG00000005566	978.473	-0.0134132	0.0626077	0.325891	0.935103	Trim28	tripartite motif-containing 28	7	11.2058	11.272	11.0444	11.068	11.1265	11.3453	10.8846	11.5485	11.3336	11.336	11.3403
ENSMUSG00000005575	247.738	0.0121613	0.0633129	0.144177	0.935103	Ube2m	ubiquitin-conjugating enzyme E2M	7	10.9573	10.6199	10.5894	10.6486	10.4839	10.4829	10.1443	10.4625	10.5588	10.6219	10.4366
ENSMUSG00000005580	63.4207	-0.00152533	0.0619689	0.734627	0.967504	Adcy9	adenylate cyclase 9	16	9.91944	10.2189	10.045	10.1016	10.036	10.2778	10.2938	10.0373	10.0259	10.1978	10.1373
ENSMUSG00000005583	3918.48	0.0112462	0.0591058	0.561007	0.935103	Mef2c	myocyte enhancer factor 2C	13	12.3641	12.6687	12.4522	12.3535	12.5072	12.3262	12.4291	12.1977	12.2488	12.574	12.4425
ENSMUSG00000005609	375.023	0.00866047	0.0614183	0.524129	0.935103	Ctr9	CTR9 homolog, Paf1/RNA polymerase II complex component	7	10.8191	10.6765	10.7321	10.5359	10.7706	10.9532	10.6635	10.7524	10.6698	10.6604	10.7733
ENSMUSG00000005610	5478.75	0.0214011	0.0643232	0.246188	0.935103	Eif4g2	eukaryotic translation initiation factor 4, gamma 2	7	12.9635	13.1054	12.6804	12.942	12.526	13.0849	12.655	12.4867	12.7242	12.652	13.0091
ENSMUSG00000005611	16.2276	0.000547258	0.0620721	0.809947	0.975147	Irag1	inositol 1,4,5-triphosphate receptor associated 1	7	10.119	9.88965	10.0241	9.96179	9.76487	9.9534	9.94655	9.83821	9.80844	10.043	10.0829
ENSMUSG00000005615	153.146	-0.00102455	0.0619649	0.804719	0.97478	Pcyt1a	phosphate cytidylyltransferase 1, choline, alpha isoform	16	9.92296	10.4618	10.1636	10.4275	10.4108	10.3962	10.2336	10.653	10.4203	10.1568	10.2499
ENSMUSG00000005621	1065.59	0.0388859	0.0790593	0.0181431	0.665625	Zfp592	zinc finger protein 592	7	11.5969	11.5442	11.3065	11.3213	11.7214	11.2195	10.9355	11.2068	11.3321	11.1109	11.2342
ENSMUSG00000005625	1052.54	0.0180832	0.0648298	0.129973	0.935103	Psmd4	proteasome (prosome, macropain) 26S subunit, non-ATPase, 4	3	11.3271	11.8391	11.5314	11.1578	11.1808	11.3264	11.1344	10.8591	11.4227	11.1427	11.2677
ENSMUSG00000005656	348.773	0.00244923	0.0614469	0.799621	0.974247	Snx6	sorting nexin 6	12	10.5996	10.6254	10.8959	10.5377	10.7648	10.7406	11.0329	10.4522	10.671	10.5787	10.5538
ENSMUSG00000005667	95.0359	-0.0235542	0.0682712	0.00858977	0.51789	Mthfd2	methylenetetrahydrofolate dehydrogenase (NAD+ dependent), methenyltetrahydrofolate cyclohydrolase	6	10.038	10.1631	10.1333	10.2258	10.241	10.2489	10.4058	10.3994	10.3438	10.2102	10.3579
ENSMUSG00000005674	87.4731	-0.00622969	0.062442	0.103014	0.935103	Tomm40l	translocase of outer mitochondrial membrane 40-like	1	9.84256	10.1331	10.1431	10.0944	10.3929	10.0308	10.4874	10.3346	10.4086	10.1763	10.1496
ENSMUSG00000005677	10.466	-0.00139725	0.0621393	0.0576732	0.872981	Nr1i3	nuclear receptor subfamily 1, group I, member 3	1	9.74924	9.74924	9.85384	9.85384	9.85384	9.85384	10.2463	9.74924	9.99156	9.85384	9.85384
ENSMUSG00000005682	190.105	0.000516473	0.0616653	0.947521	0.995734	Pan2	PAN2 poly(A) specific ribonuclease subunit	10	10.4968	10.2276	10.3744	10.4817	10.4538	10.5239	10.6805	10.2396	10.2918	10.4879	10.2643
ENSMUSG00000005683	1007.45	-0.00676109	0.060952	0.63172	0.945707	Cs	citrate synthase	10	11.5623	11.0342	11.0843	11.1485	11.2398	11.2606	11.0326	11.3763	11.3546	11.2461	11.4256
ENSMUSG00000005686	117.698	-0.00141867	0.0619299	0.77817	0.971262	Ampd3	adenosine monophosphate deaminase 3	7	10.4861	10.2113	10.3932	10.163	10.229	9.94496	10.363	9.99206	10.4541	10.2761	10.3816
ENSMUSG00000005687	353.804	-0.00145108	0.0617668	0.81834	0.976392	Bcas2	breast carcinoma amplified sequence 2	3	10.1911	10.7016	10.6412	10.5316	10.8201	10.5873	10.6767	10.784	10.4364	10.4987	10.6034
ENSMUSG00000005698	1083.05	0.0068578	0.0618807	0.493128	0.935103	Ctcf	CCCTC-binding factor	8	11.916	10.9315	11.4596	11.0353	11.3863	11.3987	10.8265	11.5412	11.3763	11.189	11.2815
ENSMUSG00000005699	26.6484	0.000231793	0.0620891	0.873612	0.987092	Pard6a	par-6 family cell polarity regulator alpha	8	9.97329	10.2116	9.93526	9.90548	10.084	9.81175	9.85604	9.85604	10.2261	9.74704	10.11
ENSMUSG00000005716	3.89043	-0.000562996	0.0621198	0.539821	0.935103	Pvalb	parvalbumin	15	9.76213	9.76213	9.84095	9.84095	9.84095	9.84095	10.0774	9.76213	9.84095	9.84095	9.84095
ENSMUSG00000005718	177.537	-0.00828128	0.0627987	0.0342465	0.780931	Tfap4	transcription factor AP4	16	9.87176	10.2346	10.2724	10.1466	10.1861	10.5405	10.8519	10.4884	10.2909	10.579	10.5162
ENSMUSG00000005732	633.398	-0.0218962	0.0661997	0.103948	0.935103	Ranbp1	RAN binding protein 1	16	10.7544	10.7047	10.9967	11.0756	10.9655	10.9557	11.1193	11.389	11.0167	10.9988	10.9338
ENSMUSG00000005774	675.554	0.0112166	0.0627939	0.2451	0.935103	Rfx5	regulatory factor X, 5 (influences HLA class II expression)	3	11.3303	11.2009	10.8683	11.3811	10.7144	10.9815	10.6637	10.8256	10.907	11.1496	11.0339
ENSMUSG00000005779	532.344	0.0219288	0.0669451	0.0482422	0.845307	Psmb4	proteasome (prosome, macropain) subunit, beta type 4	3	11.412	10.9349	11.1233	10.8794	10.9028	10.7324	10.5395	10.6596	10.8267	10.8428	10.8981
ENSMUSG00000005802	200.237	0.00311301	0.0619062	0.625562	0.943906	Slc30a4	solute carrier family 30 (zinc transporter), member 4	2	10.8513	10.3065	10.6107	10.2641	10.3566	10.5562	10.6208	10.0417	10.5341	10.5216	10.3425
ENSMUSG00000005803	8.76406	-0.00179116	0.0621547	0.0244469	0.726895	Sqor	sulfide quinone oxidoreductase	2	9.75163	9.75163	9.85145	9.85145	9.85145	9.85145	9.85997	10.1619	10.0602	9.85145	9.85145
ENSMUSG00000005804	268.989	0.0202149	0.0664957	0.0228058	0.723456	Bloc1s6	biogenesis of lysosomal organelles complex-1, subunit 6, pallidin	2	10.9553	10.4417	10.7454	10.3603	10.8623	10.6288	10.5429	10.3179	10.4718	10.3992	10.4835
ENSMUSG00000005813	328.017	-0.0192944	0.0659673	0.0228419	0.723456	Metap1	methionyl aminopeptidase 1	3	10.3508	10.2867	10.7992	10.5714	10.5282	10.613	11.0463	10.9051	10.678	10.6733	10.6673
ENSMUSG00000005823	200.01	-0.0164846	0.0647266	0.0525439	0.852077	Gpr108	G protein-coupled receptor 108	17	10.3061	10.1971	10.4235	10.4715	10.4663	10.3538	10.6819	10.5636	10.3521	10.4173	10.5758
ENSMUSG00000005824	5.20477	-0.000396039	0.0621173	0.432211	0.935103	Tnfsf14	tumor necrosis factor (ligand) superfamily, member 14	17	9.76832	10.1088	9.83476	9.83476	9.83476	9.83476	9.76832	9.76832	9.96543	9.83476	9.83476
ENSMUSG00000005846	630.682	-0.0114756	0.0621989	0.218756	0.935103	Rsl1d1	ribosomal L1 domain containing 1	16	10.978	10.7452	10.944	10.9374	10.8041	11.1735	11.3545	10.8988	10.9732	11.1427	10.984
ENSMUSG00000005864	2.16543	-0.000554766	0.0621197	0.552385	0.935103	Cnga2	cyclic nucleotide gated channel alpha 2	X	9.77211	9.77211	9.83097	9.83097	9.83097	9.83097	9.77211	10.0076	9.83097	9.83097	9.83097
ENSMUSG00000005871	838.076	0.00336361	0.0618631	0.651151	0.948676	Apc	APC, WNT signaling pathway regulator	18	11.8633	10.7264	10.7406	10.6936	11.5111	11.3604	11.0137	10.8801	11.0408	11.4	11.0996
ENSMUSG00000005873	350.904	-0.00540389	0.0619427	0.472036	0.935103	Reep5	receptor accessory protein 5	18	10.4786	10.5211	10.8906	10.7535	10.5679	10.5672	10.4574	11.2068	10.656	10.679	10.5477
ENSMUSG00000005881	398.967	0.0222169	0.0674006	0.0229733	0.723456	Ergic3	ERGIC and golgi 3	2	11.1766	10.9037	10.7058	10.8438	10.7132	10.9338	10.1965	10.695	10.7709	10.6307	10.6024
ENSMUSG00000005882	200.325	-0.0153207	0.0645661	0.032454	0.77198	Uqcc1	ubiquinol-cytochrome c reductase complex assembly factor 1	2	10.0905	10.5024	10.1329	10.2509	10.379	10.4329	10.3402	10.754	10.5472	10.6163	10.5933
ENSMUSG00000005883	1.69099	-6.25251e-05	0.0621134	0.713832	0.963116	Spo11	SPO11 initiator of meiotic double stranded breaks	2	9.77963	9.77963	9.82345	9.87124	9.82345	9.82345	9.9822	9.77963	9.82345	9.82345	9.82345
ENSMUSG00000005886	917.682	0.00121489	0.0607553	0.940501	0.995596	Ncoa2	nuclear receptor coactivator 2	1	10.7639	11.5284	11.2799	11.214	11.3687	11.0947	11.438	11.1767	11.1959	11.1944	11.2396
ENSMUSG00000005892	5.15779	0.000488565	0.0621189	0.523058	0.935103	Trh	thyrotropin releasing hormone	6	9.75619	10.119	9.84689	9.84689	9.84689	9.84689	9.75619	9.75619	9.84689	9.84689	9.84689
ENSMUSG00000005893	727.291	0.013329	0.0631037	0.255934	0.935103	Nr2c2	nuclear receptor subfamily 2, group C, member 2	6	11.3473	11.007	10.8938	10.884	11.0799	11.2434	10.6583	11.0349	11.1623	10.8506	10.9691
ENSMUSG00000005897	49.7111	-0.00347924	0.0620466	0.500138	0.935103	Nr2c1	nuclear receptor subfamily 2, group C, member 1	10	10.0396	10.1801	10.1619	10.1648	10.0956	9.86626	10.2465	9.98635	10.2803	10.0707	10.1525
ENSMUSG00000005899	115.195	0.00227793	0.061909	0.695876	0.959335	Smpd4	sphingomyelin phosphodiesterase 4	16	10.5994	9.96248	10.4268	10.1965	10.3657	10.2674	10.0966	10.5185	10.2282	10.243	10.3323
ENSMUSG00000005907	139.448	-0.00662818	0.0624725	0.160195	0.935103	Pex1	peroxisomal biogenesis factor 1	5	10.1566	10.2557	10.3861	10.1256	10.0665	10.4805	10.7933	10.0583	10.0776	10.7539	10.3216
ENSMUSG00000005936	505.142	0.000413591	0.061482	0.954909	0.996715	Kctd20	potassium channel tetramerisation domain containing 20	17	11.0346	10.6347	10.4456	10.9352	10.8994	10.8195	11.0208	10.4779	10.9049	10.9189	10.6205
ENSMUSG00000005947	1.80848	0.00030902	0.0621086	0.729243	0.966487	Itgae	integrin alpha E, epithelial-associated	11	9.80668	9.93266	9.7964	9.7964	9.7964	9.91742	9.80668	9.80668	9.85801	9.90622	9.7964
ENSMUSG00000005949	110.893	0.000663612	0.0618612	0.913484	0.991262	Ctns	cystinosis, nephropathic	11	10.5467	9.94943	10.2914	10.4299	10.3119	10.1143	10.3065	10.327	10.3489	10.101	10.3796
ENSMUSG00000005951	8.99129	-0.00314402	0.0622044	0.209778	0.935103	Shpk	sedoheptulokinase	11	9.87919	9.87919	9.79684	9.72389	9.83556	9.895	9.87919	9.87919	10.0221	9.92712	9.95382
ENSMUSG00000005973	69.1374	-0.00927947	0.0630089	0.0148863	0.627496	Rcn1	reticulocalbin 1	2	9.82254	10.0216	10.1395	10.1706	10.1175	10.0547	10.4071	10.3818	10.0487	10.3402	10.2366
ENSMUSG00000005981	441.009	0.00441746	0.0615206	0.657366	0.949952	Trap1	TNF receptor-associated protein 1	16	10.9189	10.936	10.8834	10.7839	10.7123	10.5983	10.8846	10.3568	10.8013	10.896	10.7433
ENSMUSG00000005982	399.708	0.014651	0.0627708	0.320124	0.935103	Naa60	N(alpha)-acetyltransferase 60, NatF catalytic subunit	16	10.8436	10.7763	10.7118	10.8749	10.5377	10.8882	10.7301	10.6057	10.7325	10.7537	10.6736
ENSMUSG00000005983	33.5056	-0.00638822	0.0625165	0.0671056	0.911911	1700037C18Rik	RIKEN cDNA 1700037C18 gene	16	9.78912	10.0355	10.0832	9.97944	9.85617	10.0235	10.3461	9.99975	10.0227	10.1505	10.1829
ENSMUSG00000005986	16.9501	-0.00193432	0.0621375	0.115172	0.935103	Ankrd13d	ankyrin repeat domain 13 family, member D	19	9.78368	9.78368	9.8194	9.96273	9.96558	9.89865	9.78368	10.3501	9.89486	9.89131	10.0445
ENSMUSG00000006005	1448.19	-0.0200596	0.0659147	0.0750602	0.924167	Tpr	translocated promoter region, nuclear basket protein	1	10.8894	11.4499	11.5366	11.1875	11.5186	11.6369	11.8299	11.927	11.3179	11.5339	11.9369
ENSMUSG00000006010	183.522	-0.00580349	0.0619299	0.478189	0.935103	Odr4	odr4 GPCR localization factor homolog	1	10.4353	10.2449	10.3837	10.6271	10.3067	10.4573	10.7652	10.3194	10.3909	10.436	10.4869
ENSMUSG00000006019	146.19	0.0010902	0.0617291	0.881201	0.987779	Dhx34	DEAH (Asp-Glu-Ala-His) box polypeptide 34	7	10.144	10.4399	10.4252	10.2929	10.1412	10.4749	10.4607	10.2041	10.4096	10.1908	10.2505
ENSMUSG00000006021	53.3781	-0.00429478	0.0619405	0.533714	0.935103	Kptn	kaptin	7	10.215	10.1351	10.1417	10.1402	10.0469	10.0506	10.1932	10.0052	10.0721	10.2744	10.234
ENSMUSG00000006024	426.48	0.00569223	0.0616773	0.569708	0.935103	Napa	N-ethylmaleimide sensitive fusion protein attachment protein alpha	7	10.9648	10.7048	11.0627	10.5483	10.7063	10.8662	10.6652	10.7758	10.5057	10.785	10.9694
ENSMUSG00000006050	257.468	-0.0103524	0.0624461	0.311171	0.935103	Sra1	steroid receptor RNA activator 1	18	10.397	10.4591	10.6147	10.5909	10.5547	10.5554	10.6851	10.7222	10.7814	10.371	10.4929
ENSMUSG00000006057	268.538	0.000861523	0.061985	0.836007	0.978256	Atp5g1	ATP synthase, H+ transporting, mitochondrial F0 complex, subunit C1 (subunit 9)	11	11.121	10.4905	10.5516	10.2626	10.5152	10.4675	9.80671	10.6431	10.7631	10.4809	10.5663
ENSMUSG00000006058	250.54	-0.00313847	0.0614878	0.727518	0.966386	Snf8	SNF8, ESCRT-II complex subunit, homolog (S. cerevisiae)	11	10.2143	10.595	10.6659	10.6266	10.4942	10.6073	10.6891	10.7521	10.5435	10.4416	10.5592
ENSMUSG00000006095	163.819	-0.00844551	0.0625791	0.202868	0.935103	Tbcb	tubulin folding cofactor B	7	10.1697	10.2925	10.3087	10.4225	10.5256	10.3136	10.2351	10.8984	10.3624	10.3191	10.5405
ENSMUSG00000006127	288.963	0.00882201	0.0626499	0.211107	0.935103	Inpp5k	inositol polyphosphate 5-phosphatase K	11	10.8998	10.4353	10.7441	10.2419	10.8507	10.8314	10.344	10.7375	10.5356	10.4314	10.5939
ENSMUSG00000006134	708.282	-0.00783134	0.0618855	0.462037	0.935103	Crkl	v-crk avian sarcoma virus CT10 oncogene homolog-like	16	10.9249	10.932	10.4422	10.9814	11.1239	10.4989	10.8121	10.8891	11.2378	10.9912	10.951
ENSMUSG00000006154	69.0031	0.00128252	0.0615121	0.882889	0.987779	Eps8l1	EPS8-like 1	7	10.051	10.051	10.0736	9.99868	10.0912	10.059	10.051	10.051	10.0845	9.98786	10.062
ENSMUSG00000006169	1196.43	0.00263898	0.058751	0.905017	0.990764	Clint1	clathrin interactor 1	11	11.429	11.4425	11.5163	11.3234	11.4466	11.3156	11.3709	11.3769	11.5591	11.1975	11.4751
ENSMUSG00000006191	353.131	0.0243855	0.0687568	0.00977646	0.554213	Cdkal1	CDK5 regulatory subunit associated protein 1-like 1	13	10.8943	11.0418	10.4889	10.9139	10.7932	10.7267	10.2537	10.5034	10.5258	10.5617	10.7029
ENSMUSG00000006215	155.119	-0.0054168	0.0621126	0.367598	0.935103	Zbtb17	zinc finger and BTB domain containing 17	4	10.2542	10.087	10.5688	10.5342	10.2684	10.2712	10.609	10.6147	10.3627	10.4277	10.3057
ENSMUSG00000006221	2.62397	0.000297094	0.062114	0.773102	0.970758	Hspb7	heat shock protein family, member 7 (cardiovascular)	4	9.75856	9.99405	9.84452	9.84452	9.84452	9.84452	9.8669	9.75856	9.84452	9.84452	9.84452
ENSMUSG00000006262	333.727	0.00508246	0.0623013	0.120833	0.935103	Mob1b	MOB kinase activator 1B	5	11.7281	10.4885	10.5821	10.5012	10.4408	10.5546	9.94452	9.98948	10.399	10.7436	10.5422
ENSMUSG00000006273	466.481	-0.0274407	0.0679757	0.128645	0.935103	Atp6v1b2	ATPase, H+ transporting, lysosomal V1 subunit B2	8	10.5836	10.7928	10.7827	10.7664	10.8442	10.8033	10.9077	10.9614	10.8963	10.8098	10.7771
ENSMUSG00000006276	435.767	-0.00787808	0.0624437	0.262059	0.935103	Eps15l1	epidermal growth factor receptor pathway substrate 15-like 1	8	10.6923	10.4045	10.5744	10.8738	10.5721	10.7515	10.4248	11.2896	10.657	10.754	10.7367
ENSMUSG00000006281	360.654	-0.000665754	0.0616168	0.914468	0.991262	Tep1	telomerase associated protein 1	14	11.1285	10.3018	10.7992	10.6052	10.5243	10.5346	10.6053	10.6457	10.8938	10.7988	10.5363
ENSMUSG00000006288	364.992	0.00730839	0.0620578	0.428294	0.935103	Ttc5	tetratricopeptide repeat domain 5	14	10.642	10.8816	10.5849	11.1731	10.5066	10.6716	10.6917	10.6358	10.7361	10.5915	10.7257
ENSMUSG00000006289	309.237	0.00476639	0.0615588	0.660059	0.950008	Osgep	O-sialoglycoprotein endopeptidase	14	10.5077	10.9339	10.5526	10.6922	10.6333	10.4202	10.4609	10.5392	10.6961	10.7323	10.5461
ENSMUSG00000006299	684.886	-0.00312937	0.0609204	0.794245	0.973783	Aamp	angio-associated migratory protein	1	10.7532	11.0261	10.9519	11.37	10.9191	10.8651	11.1714	11.0449	10.9665	11.0201	10.8996
ENSMUSG00000006301	24.0067	-0.00323978	0.0621311	0.389812	0.935103	Tmbim1	transmembrane BAX inhibitor motif containing 1	1	9.86884	10.0469	9.86055	10.0506	10.0292	9.77999	10.0484	9.97423	9.94301	10.0999	10.1289
ENSMUSG00000006304	2532.98	-0.0327627	0.0650271	0.229884	0.935103	Arpc2	actin related protein 2/3 complex, subunit 2	1	12.1256	11.8583	11.9426	12.082	11.9333	12.0591	12.1745	12.0204	12.1061	12.0591	12.1304
ENSMUSG00000006307	585.768	-0.0103114	0.062599	0.281018	0.935103	Kmt2b	lysine (K)-specific methyltransferase 2B	7	10.8273	11.0861	10.7445	10.8584	11.055	10.5112	11.0357	10.7192	11.1673	10.7776	11.3055
ENSMUSG00000006310	10.5242	-0.000689982	0.0620966	0.661096	0.9501	Zbtb32	zinc finger and BTB domain containing 32	7	9.86294	9.86294	9.74014	9.74014	10.1023	9.91125	9.86294	9.95421	9.80175	10.0088	9.89589
ENSMUSG00000006315	94.9936	0.00429505	0.0621953	0.314877	0.935103	Tmem147	transmembrane protein 147	7	10.6256	10.2038	10.2611	10.2537	10.3097	10.233	9.77798	10.32	10.1169	10.3458	10.1026
ENSMUSG00000006333	21150.8	-0.0098931	0.0550817	0.708648	0.96298	Rps9	ribosomal protein S9	7	14.5468	14.3967	14.3471	14.4838	14.6146	14.5697	14.5851	14.5128	14.6943	14.4443	14.4187
ENSMUSG00000006335	97.6257	0.0257914	0.0683849	0.0735491	0.924167	Tfpt	TCF3 (E2A) fusion partner	7	10.3294	10.3278	10.3089	10.3064	10.3362	10.2838	10.2992	10.1584	10.249	10.187	10.2797
ENSMUSG00000006342	11.4702	-0.00221577	0.0621626	0.071561	0.921091	Susd2	sushi domain containing 2	10	9.80334	9.7447	9.91794	9.85838	9.85838	9.85838	10.2644	9.7447	9.85838	9.9682	9.90536
ENSMUSG00000006344	16.2284	-0.00309669	0.062219	0.016768	0.646454	Ggt5	gamma-glutamyltransferase 5	10	9.77081	9.77081	9.83227	9.83227	9.99015	9.91152	10.1373	10.0638	9.83227	10.2249	9.92623
ENSMUSG00000006356	17.5305	-0.00304035	0.0622082	0.0271997	0.743173	Crip2	cysteine rich protein 2	12	9.81098	9.81098	9.7921	9.8399	9.83432	10.0065	9.81098	10.3002	10.0421	9.98669	10.0314
ENSMUSG00000006360	544.482	0.00268347	0.0609624	0.824531	0.976392	Crip1	cysteine-rich protein 1 (intestinal)	12	10.8574	10.8669	10.8745	10.9861	10.824	11.1341	11.2045	10.7216	10.9527	10.703	10.9137
ENSMUSG00000006362	893.085	-0.0131263	0.0633134	0.194257	0.935103	Cbfa2t3	CBFA2/RUNX1 translocation partner 3	8	11.1681	10.7683	11.2838	10.8698	11.1512	10.7377	11.522	10.8942	11.3751	11.0051	11.1945
ENSMUSG00000006373	203.37	0.00026504	0.061647	0.975093	0.998973	Pgrmc1	progesterone receptor membrane component 1	X	10.2669	10.4874	10.2774	10.7579	10.4055	10.4733	10.7077	10.3013	10.3987	10.3702	10.403
ENSMUSG00000006378	0.704978	-0.000136845	0.0621127	0.78423	0.97236	Gcat	glycine C-acetyltransferase (2-amino-3-ketobutyrate-coenzyme A ligase)	15	9.78915	9.91512	9.81393	9.81393	9.81393	9.81393	9.78915	9.78915	9.81393	9.81393	9.86091
ENSMUSG00000006389	7.83984	0.0004909	0.062119	0.518525	0.935103	Mpl	myeloproliferative leukemia virus oncogene	4	9.7457	10.1924	9.85738	9.85738	9.85738	9.85738	9.7457	9.7457	9.85738	9.85738	9.85738
ENSMUSG00000006390	127.94	-0.00335835	0.0620767	0.467429	0.935103	Elovl1	elongation of very long chain fatty acids (FEN1/Elo2, SUR4/Elo3, yeast)-like 1	4	9.90343	10.3971	10.1973	10.4094	10.1505	10.2852	10.1997	10.6075	10.2508	10.44	10.2053
ENSMUSG00000006392	262.866	0.00308662	0.0613608	0.769943	0.97058	Med8	mediator complex subunit 8	4	10.7293	10.6049	10.7953	10.5433	10.6	10.3411	10.4953	10.5331	10.581	10.6557	10.6183
ENSMUSG00000006398	17.1907	0.00328402	0.0621823	0.221768	0.935103	Cdc20	cell division cycle 20	4	9.89341	10.0715	9.99793	9.92849	10.0518	9.80117	9.89341	9.89341	9.97786	9.8593	9.94897
ENSMUSG00000006411	9.81824	-0.000289179	0.0620931	0.865161	0.986762	Nectin4	nectin cell adhesion molecule 4	1	9.88021	9.88021	9.96453	9.72288	9.97585	9.72288	9.88021	9.88021	9.95725	9.86052	9.95754
ENSMUSG00000006412	168.438	-0.0118686	0.0626078	0.306953	0.935103	Pfdn2	prefoldin 2	1	10.499	10.3996	10.4166	10.3154	10.3491	10.4857	10.3799	10.4702	10.544	10.3732	10.5764
ENSMUSG00000006418	689.129	-0.00583633	0.0602043	0.714197	0.963116	Rnf114	ring finger protein 114	2	10.8952	11.0301	10.928	11.1207	11.0659	10.9463	10.878	11.2351	11.0803	11.0082	10.9176
ENSMUSG00000006423	446.052	-0.000850091	0.0617725	0.797438	0.974247	C330007P06Rik	RIKEN cDNA C330007P06 gene	X	11.2644	10.533	10.4979	10.9641	10.7259	10.5174	10.3067	10.9345	10.5824	11.2508	10.7791
ENSMUSG00000006442	90.06	0.00529926	0.0622442	0.274053	0.935103	Srm	spermidine synthase	4	10.3006	10.3774	10.1872	10.1552	10.2243	10.1522	9.9307	10.1602	10.1816	10.238	10.2071
ENSMUSG00000006456	432.562	0.00268601	0.0618324	0.641675	0.947447	Rbm14	RNA binding motif protein 14	19	10.5093	11.2273	10.6638	10.4535	10.9056	10.8537	10.2628	10.9139	10.6318	11.0377	10.5523
ENSMUSG00000006462	7.92868	-0.00135169	0.0621369	0.0670799	0.911911	A530013C23Rik	RIKEN cDNA A530013C23 gene	2	9.78203	9.78203	9.82105	9.82105	9.82105	9.88576	10.1323	9.78203	10.0962	9.82105	9.82105
ENSMUSG00000006463	54.0314	-0.00271327	0.0620506	0.51238	0.935103	Zdhhc24	zinc finger, DHHC domain containing 24	19	10.0108	10.2234	10.1871	9.81151	10.2107	10.0931	10.0275	10.2609	10.1853	10.3224	10.1044
ENSMUSG00000006464	3.04978	-0.000123183	0.0621106	0.844006	0.98031	Bbs1	Bardet-Biedl syndrome 1 (human)	19	9.80215	9.98751	9.80093	9.89651	9.80093	9.80093	9.80215	9.80215	9.86255	9.80093	9.97662
ENSMUSG00000006471	185.903	-0.00528876	0.0623328	0.134134	0.935103	Ndor1	NADPH dependent diflavin oxidoreductase 1	2	9.85925	10.2911	10.1332	10.4203	10.2374	10.5591	10.3563	10.9603	10.7151	10.1717	10.3304
ENSMUSG00000006476	77.547	0.00328529	0.0621709	0.225266	0.935103	Nsmf	NMDA receptor synaptonuclear signaling and neuronal migration factor	2	10.3817	10.3537	10.3212	9.90853	9.97016	10.3623	10.0033	9.86003	10.3531	10.2267	9.90573
ENSMUSG00000006494	458.556	0.0174154	0.0647332	0.125874	0.935103	Pdk1	pyruvate dehydrogenase kinase, isoenzyme 1	2	10.9458	10.9767	10.7722	11.2421	10.6406	10.7757	10.5528	10.8	10.7903	10.7193	10.7914
ENSMUSG00000006498	1524.74	-0.0061453	0.0612588	0.58756	0.93523	Ptbp1	polypyrimidine tract binding protein 1	10	11.4106	11.2008	11.6697	11.8869	11.5628	11.4763	11.63	12.089	11.4931	11.5555	11.4339
ENSMUSG00000006517	25.4696	-0.00285167	0.0621401	0.354042	0.935103	Mvd	mevalonate (diphospho) decarboxylase	8	10.0982	9.84286	9.81977	9.9892	9.90018	10.0632	9.84286	10.2033	10.1052	10.0785	10.0215
ENSMUSG00000006519	1582.96	0.0228783	0.0620815	0.30408	0.935103	Cyba	cytochrome b-245, alpha polypeptide	8	11.5814	11.6867	11.6214	11.8169	11.6642	11.5632	11.529	11.6815	11.5185	11.4991	11.6542
ENSMUSG00000006526	129.194	-0.0034896	0.0620477	0.481588	0.935103	Stimate	STIM activating enhancer	14	9.97939	10.3714	9.9471	10.5903	10.2109	10.3015	10.4165	10.4066	10.3373	10.2194	10.4479
ENSMUSG00000006527	288.637	-0.00418658	0.0619127	0.529666	0.935103	Sfmbt1	Scm-like with four mbt domains 1	14	10.0984	10.6485	10.7253	10.4375	10.7166	10.577	10.8087	10.7875	10.4721	10.4828	10.6892
ENSMUSG00000006567	11.4451	0.00209507	0.0621613	0.0748708	0.924167	Atp7b	ATPase, Cu++ transporting, beta polypeptide	8	10.2121	9.77879	9.82429	9.93114	9.8665	10.1022	9.77879	9.83149	9.82429	9.82429	9.92932
ENSMUSG00000006575	0.874317	-0.000546176	0.0621133	0.661442	0.950206	Rundc3a	RUN domain containing 3A	11	9.8161	9.8161	9.78698	9.78698	9.8601	9.78698	9.8161	9.8161	9.91765	9.78698	9.78698
ENSMUSG00000006576	2.52686	0.00216367	0.0621478	0.197638	0.935103	Slc4a3	solute carrier family 4 (anion exchanger), member 3	1	9.85651	9.98323	9.80521	9.853	9.91687	9.86991	9.79788	9.79788	9.84877	9.84672	9.87164
ENSMUSG00000006585	230.559	0.0086236	0.0623067	0.360492	0.935103	Cdt1	chromatin licensing and DNA replication factor 1	8	10.6814	10.6859	10.3928	10.4743	10.5865	10.3956	10.2675	10.3656	10.6187	10.5117	10.521
ENSMUSG00000006589	169.889	-0.00610036	0.0622734	0.309619	0.935103	Aprt	adenine phosphoribosyl transferase	8	10.2149	10.5071	10.3931	10.1603	10.3795	10.2075	10.6369	10.0842	10.6979	10.4881	10.1991
ENSMUSG00000006599	269.116	-0.529401	0.425937	0.00323565	0.321744	Gtf2h1	general transcription factor II H, polypeptide 1	7	10.2721	10.4466	10.5297	10.5634	10.547	10.5481	10.9887	10.6414	10.5717	10.6579	10.6925
ENSMUSG00000006611	5.83648	-0.000486207	0.062119	0.130783	0.935103	Hfe	homeostatic iron regulator	13	9.79633	10.0777	9.80675	9.80675	9.80675	9.80675	9.79633	9.79633	9.89388	10.0339	9.91179
ENSMUSG00000006638	1.6294	0.000200264	0.0621089	0.873373	0.987075	Abhd1	abhydrolase domain containing 1	5	9.82183	9.82183	9.78125	9.78125	9.95002	9.78125	9.82183	9.82183	9.8965	9.78125	9.78125
ENSMUSG00000006641	163.662	0.000228586	0.0620695	0.914373	0.991262	Slc5a6	solute carrier family 5 (sodium-dependent vitamin transporter), member 6	5	11.1353	10.0634	9.86029	10.0842	10.1097	10.5736	9.95245	9.95989	10.364	10.8147	10.1378
ENSMUSG00000006651	1.20922	0.0006236	0.0621061	0.66987	0.952408	Aplp1	amyloid beta (A4) precursor-like protein 1	7	9.81352	9.90261	9.78956	9.88514	9.83178	9.83532	9.81352	9.81352	9.78956	9.84827	9.87093
ENSMUSG00000006673	1168.01	-0.00933527	0.0616268	0.48573	0.935103	Qrich1	glutamine-rich 1	9	11.4048	11.1024	11.0575	11.6647	11.2761	11.1994	11.1732	11.6424	11.363	11.3888	11.3654
ENSMUSG00000006675	26.9391	3.4911	1.31973	8.72822e-05	0.0187626	P4htm	prolyl 4-hydroxylase, transmembrane (endoplasmic reticulum)	9	10.164	10.1324	10.2426	10.1073	9.94405	10.059	9.83299	9.83299	9.88533	9.77009	9.92584
ENSMUSG00000006676	745.314	0.0218622	0.0666071	0.0787477	0.931711	Usp19	ubiquitin specific peptidase 19	9	11.2397	10.9961	11.4148	10.7438	11.0486	11.012	10.9912	10.7173	10.7704	10.9864	10.9267
ENSMUSG00000006678	137.873	-0.00303676	0.0614765	0.770486	0.970606	Pola1	polymerase (DNA directed), alpha 1	X	10.1887	10.3809	10.4016	10.3351	10.4278	10.1875	10.4518	10.2948	10.3225	10.392	10.2368
ENSMUSG00000006699	2045.32	0.0136367	0.0599465	0.535446	0.935103	Cdc42	cell division cycle 42	4	12.0163	11.6383	11.8237	11.8429	11.7997	11.7798	11.9066	11.5988	11.7518	11.7958	11.7364
ENSMUSG00000006705	196.951	-0.00485198	0.0618038	0.557313	0.935103	Pknox1	Pbx/knotted 1 homeobox	17	10.4806	10.2817	10.3375	10.3778	10.5522	10.6056	10.3036	10.7932	10.3893	10.4383	10.5526
ENSMUSG00000006715	93.8986	0.00102798	0.0616451	0.895737	0.989676	Gmnn	geminin	13	10.2136	10.35	10.0974	10.3664	10.3277	10.1618	10.1269	10.3037	10.4125	10.17	10.2038
ENSMUSG00000006717	159.82	-0.0051565	0.0619447	0.500516	0.935103	Acot13	acyl-CoA thioesterase 13	13	10.2007	10.522	10.3252	10.386	10.4032	10.4349	10.1409	10.7428	10.2805	10.4602	10.5212
ENSMUSG00000006724	2.06349	0.000238557	0.0621093	0.844798	0.98044	Cyp27b1	cytochrome P450, family 27, subfamily b, polypeptide 1	10	9.82424	9.82424	9.77884	9.77884	9.97215	9.77884	9.82424	9.82424	9.77884	9.90335	9.77884
ENSMUSG00000006728	443.343	-0.00383807	0.0619479	0.493425	0.935103	Cdk4	cyclin-dependent kinase 4	10	10.6844	10.494	10.6306	10.7746	10.9762	10.694	11.489	10.2886	10.6593	10.6617	10.7767
ENSMUSG00000006731	1323.53	0.0154141	0.061488	0.406655	0.935103	B4galnt1	beta-1,4-N-acetyl-galactosaminyl transferase 1	10	11.707	11.475	11.5629	11.2926	11.5343	11.4736	11.4438	11.2558	11.5554	11.3871	11.487
ENSMUSG00000006732	68.7716	-0.00602554	0.0623909	0.126604	0.935103	Mettl1	methyltransferase like 1	10	9.87635	10.0944	10.1687	10.2002	10.1577	10.0431	10.187	10.4452	10.1104	10.1384	10.2366
ENSMUSG00000006736	363.212	-0.00846987	0.0624064	0.295794	0.935103	Tspan31	tetraspanin 31	10	10.2991	10.692	10.4843	10.9909	10.4178	10.5802	10.883	10.7106	10.7974	10.551	10.7015
ENSMUSG00000006740	1123.78	-0.00581846	0.0612261	0.618222	0.941945	Kif5b	kinesin family member 5B	18	11.3116	11.0281	11.3111	11.3547	11.3246	11.5884	11.2779	11.7934	11.5306	11.2319	11.1279
ENSMUSG00000006763	150.48	0.00910293	0.0627419	0.177767	0.935103	Saal1	serum amyloid A-like 1	7	10.6458	10.3706	10.3705	10.3853	10.3789	10.3989	10.4031	10.0028	10.3121	10.3281	10.3153
ENSMUSG00000006782	1810.72	0.0108948	0.0591554	0.615379	0.941178	Cnp	2',3'-cyclic nucleotide 3' phosphodiesterase	11	11.5639	11.7368	11.5019	11.8585	11.7227	11.7291	11.7717	11.5861	11.65	11.5439	11.6463
ENSMUSG00000006800	0.801386	0.000718513	0.0621217	0.411304	0.935103	Sulf2	sulfatase 2	2	9.81178	9.81178	9.7913	9.93463	9.7913	9.7913	9.81178	9.81178	9.7913	9.7913	9.7913
ENSMUSG00000006818	505.832	0.00224133	0.061821	0.796176	0.974115	Sod2	superoxide dismutase 2, mitochondrial	17	10.6872	10.8753	10.7957	11.3938	10.5885	10.5722	11.2751	10.3128	10.7694	10.6252	10.7683
ENSMUSG00000006850	47.1056	0.000517347	0.0619616	0.89335	0.989436	Tmco6	transmembrane and coiled-coil domains 6	18	9.96958	10.0956	10.0735	9.87221	9.9285	10.1465	9.96958	10.0441	9.94405	10.2702	9.90301
ENSMUSG00000006906	139.894	-0.00722683	0.0621932	0.370553	0.935103	Stambp	STAM binding protein	6	10.3935	10.35	10.4123	10.0584	10.3296	10.1434	10.2756	10.2952	10.4038	10.5513	10.4011
ENSMUSG00000006920	464.621	0.0091065	0.0618334	0.459821	0.935103	Ezh1	enhancer of zeste 1 polycomb repressive complex 2 subunit	11	10.9746	10.8047	10.784	11.0501	10.6802	10.5949	10.742	10.6244	10.7584	10.9434	10.694
ENSMUSG00000006930	8.95707	0.00146011	0.0621367	0.0863299	0.935103	Hap1	huntingtin-associated protein 1	11	9.7677	10.2085	9.83538	9.83538	9.9198	9.98707	9.7677	9.7677	9.89699	9.83538	9.83538
ENSMUSG00000006932	1013.19	-0.00632231	0.0617163	0.494931	0.935103	Ctnnb1	catenin (cadherin associated protein), beta 1	9	10.9024	10.925	11.3409	11.3956	11.3313	11.3132	11.4469	11.7153	11.0236	11.0867	11.2405
ENSMUSG00000006941	342.535	-0.00368476	0.0606136	0.796789	0.974247	Eif1b	eukaryotic translation initiation factor 1B	9	10.631	10.6731	10.5106	10.8367	10.6732	10.7557	10.6565	10.8064	10.604	10.7505	10.7115
ENSMUSG00000006998	795.169	0.00225473	0.0612421	0.83348	0.977853	Psmd2	proteasome (prosome, macropain) 26S subunit, non-ATPase, 2	16	10.9627	11.4199	11.1664	10.6962	11.1122	11.1201	10.9117	10.9907	10.8104	11.2883	11.3051
ENSMUSG00000007029	2497.93	-0.00472636	0.0612931	0.676186	0.953618	Vars	valyl-tRNA synthetase	17	11.4736	12.1886	11.7827	12.5462	11.4961	11.7071	12.1903	11.8645	12.065	11.929	11.9785
ENSMUSG00000007030	3.54957	0.000777064	0.0621234	0.152634	0.935103	Vwa7	von Willebrand factor A domain containing 7	17	9.83117	9.83117	9.77191	9.77191	10.0284	9.93033	9.83117	9.83117	9.77191	9.77191	9.77191
ENSMUSG00000007035	0.817593	-0.000943957	0.0621262	0.351462	0.935103	Msh5	mutS homolog 5	17	9.81904	9.81904	9.78404	9.78404	9.78404	9.78404	9.81904	9.81904	9.89074	9.85594	9.85048
ENSMUSG00000007036	204.945	0.0166047	0.064501	0.119531	0.935103	Abhd16a	abhydrolase domain containing 16A	17	10.47	10.6049	10.5328	10.6421	10.2775	10.4298	10.4076	10.2852	10.3156	10.5092	10.3865
ENSMUSG00000007038	317.078	0.00690075	0.06236	0.275765	0.935103	Neu1	neuraminidase 1	17	11.351	10.228	10.8096	10.5945	10.6082	10.431	10.3305	10.5151	10.4594	10.7491	10.5914
ENSMUSG00000007039	6.07835	0.000434732	0.0621098	0.617639	0.941865	Ddah2	dimethylarginine dimethylaminohydrolase 2	17	9.81365	10.0317	9.78943	9.78943	9.78943	10.0313	9.81365	9.81365	9.97416	9.91395	9.78943
ENSMUSG00000007041	1254.42	0.013063	0.0600179	0.479453	0.935103	Clic1	chloride intracellular channel 1	17	11.4741	11.475	11.5349	11.3159	11.3359	11.6575	11.4325	11.379	11.337	11.4743	11.4256
ENSMUSG00000007050	59.1049	-0.000271587	0.0619662	0.944242	0.995639	Lsm2	LSM2 homolog, U6 small nuclear RNA and mRNA degradation associated	17	9.98006	10.331	10.0883	10.126	10.1011	10.1143	9.87851	10.2987	10.1608	10.0808	10.183
ENSMUSG00000007080	132.633	0.00214699	0.0620389	0.597789	0.936895	Pole	polymerase (DNA directed), epsilon	5	9.87775	10.5329	10.0399	10.4226	10.6892	10.1602	10.4647	10.2343	10.0837	10.3071	10.2394
ENSMUSG00000007097	1.48752	-0.000547439	0.0621195	0.563876	0.935103	Atp1a2	ATPase, Na+/K+ transporting, alpha 2 polypeptide	1	9.77714	9.77714	9.82594	9.82594	9.82594	9.82594	9.97235	9.77714	9.82594	9.82594	9.82594
ENSMUSG00000007107	1.5158	-0.000548614	0.0621195	0.56318	0.935103	Atp1a4	ATPase, Na+/K+ transporting, alpha 4 polypeptide	1	9.77691	9.77691	9.82617	9.82617	9.82617	9.82617	9.77691	9.97396	9.82617	9.82617	9.82617
ENSMUSG00000007207	2.15708	-0.00030885	0.0621088	0.818046	0.976392	Stx1a	syntaxin 1A (brain)	5	9.83211	9.83211	9.77097	9.77097	9.91715	9.77097	9.83211	9.83211	9.9339	9.84287	9.81795
ENSMUSG00000007338	107.998	-0.00158	0.0619285	0.747709	0.969261	Mrpl49	mitochondrial ribosomal protein L49	19	10.0676	10.2331	10.4272	10.003	10.2692	10.5089	10.2809	10.5691	10.2161	10.2736	10.3157
ENSMUSG00000007411	538.031	0.0214585	0.0669359	0.0307752	0.766095	Mark3	MAP/microtubule affinity regulating kinase 3	12	11.2959	11.0787	11.1399	10.6261	11.0583	10.8743	10.7019	10.4413	10.9191	10.6787	10.8597
ENSMUSG00000007415	189.087	0.00227956	0.0616002	0.778421	0.971331	Gatad1	GATA zinc finger domain containing 1	5	10.2854	10.4132	10.6619	10.4155	10.547	10.4847	10.587	10.5674	10.2241	10.464	10.4454
ENSMUSG00000007458	1232.6	-0.0468159	0.0853985	0.0545522	0.859079	M6pr	mannose-6-phosphate receptor, cation dependent	6	11.2897	11.1399	11.367	11.4444	11.2629	11.2566	11.3511	11.729	11.5111	11.3612	11.4388
ENSMUSG00000007476	183.358	-0.00153774	0.0617603	0.81612	0.976392	Lrrc8a	leucine rich repeat containing 8A VRAC subunit A	2	10.3214	10.4838	10.5082	10.4314	10.3759	10.3566	10.7442	10.0861	10.4743	10.31	10.4056
ENSMUSG00000007564	985.82	0.00511163	0.0616588	0.607331	0.939563	Ppp2r1a	protein phosphatase 2, regulatory subunit A, alpha	17	11.737	11.0584	11.3134	11.1314	11.2033	11.3361	10.6256	11.5403	11.3036	11.0064	11.388
ENSMUSG00000007570	39.4085	0.000678023	0.0619124	0.898291	0.990138	Fance	Fanconi anemia, complementation group E	17	10.1934	10.0266	10.0333	9.95804	10.1599	10.2179	9.96773	10.1803	9.95357	10.1909	10.1304
ENSMUSG00000007589	383.844	-0.00179153	0.0617808	0.786175	0.97236	Tinf2	Terf1 (TRF1)-interacting nuclear factor 2	14	10.2189	10.7943	10.7483	10.9461	10.3725	10.611	10.9407	10.6027	10.506	10.6	10.6902
ENSMUSG00000007591	2.17073	0.000761513	0.062123	0.2261	0.935103	Tssk4	testis-specific serine kinase 4	14	9.83004	9.83004	9.8672	9.77304	9.913	9.93793	9.83004	9.83004	9.77304	9.77304	9.77304
ENSMUSG00000007603	114.827	-0.00121612	0.0619277	0.805893	0.97478	Dus3l	dihydrouridine synthase 3-like (S. cerevisiae)	17	10.4262	10.0654	10.1807	10.4054	10.2122	10.2271	10.5549	9.98619	10.2173	10.2885	10.2761
ENSMUSG00000007610	155.894	-0.003829	0.0621374	0.310128	0.935103	Gtpbp3	GTP binding protein 3	8	9.85947	10.2822	10.2974	10.4282	10.308	10.4527	10.6001	10.6489	10.3162	10.341	10.2903
ENSMUSG00000007613	565.863	0.00236566	0.0615965	0.798788	0.974247	Tgfbr1	transforming growth factor, beta receptor I	4	11.2429	10.3122	11.0319	10.7835	11	10.9633	10.9463	11.0643	10.8018	10.9058	10.7535
ENSMUSG00000007617	143.954	-0.00197283	0.0617799	0.770953	0.970638	Homer1	homer scaffolding protein 1	13	10.3129	10.551	10.4301	10.1906	10.4098	10.2368	10.0237	10.5559	10.4299	10.4435	10.3855
ENSMUSG00000007646	12.7514	0.000389018	0.0620732	0.846634	0.980461	Rad51c	RAD51 paralog C	11	10.012	9.8809	9.87969	9.72218	9.96441	9.92147	9.8809	9.8809	9.92637	9.99403	9.98758
ENSMUSG00000007656	549.093	0.00161285	0.0602302	0.894366	0.989676	Arpp19	cAMP-regulated phosphoprotein 19	9	10.7072	11.1233	10.8647	11.0213	10.9297	10.9659	10.8524	11.0517	10.8981	11.0329	10.8229
ENSMUSG00000007659	30.8711	0.0050365	0.0623726	0.046386	0.836636	Bcl2l1	BCL2-like 1	2	9.87207	10.1671	10.1358	10.2686	9.93331	10.0571	9.87207	10.076	9.86874	9.91656	9.79745
ENSMUSG00000007670	1051.9	0.000496062	0.0609235	0.969522	0.998305	Khsrp	KH-type splicing regulatory protein	17	10.9736	11.6832	11.1514	11.0992	11.2525	11.2137	11.0644	11.2324	11.5184	11.2102	11.2232
ENSMUSG00000007682	2.99152	0.000481599	0.0621188	0.531994	0.935103	Dio2	deiodinase, iodothyronine, type II	12	9.76696	10.0436	9.83612	9.83612	9.83612	9.83612	9.76696	9.76696	9.83612	9.83612	9.83612
ENSMUSG00000007721	244.774	0.00136005	0.0612266	0.910804	0.991262	Ccdc124	coiled-coil domain containing 124	8	10.6259	10.6653	10.4813	10.3353	10.7184	10.6019	10.4249	10.5425	10.5819	10.6172	10.6164
ENSMUSG00000007739	1143.84	-0.00151165	0.0607582	0.903311	0.990764	Cct4	chaperonin containing Tcp1, subunit 4 (delta)	11	11.0754	11.7485	11.1591	11.3418	11.4008	11.224	11.1475	11.3803	11.6056	11.2436	11.3905
ENSMUSG00000007777	12.7293	-0.00156914	0.0621263	0.169577	0.935103	0610009B22Rik	RIKEN cDNA 0610009B22 gene	11	9.81222	9.81222	9.90995	9.99348	9.91024	9.79086	10.2199	9.81222	9.98556	10.018	9.79086
ENSMUSG00000007812	379.95	-0.000124975	0.0607933	0.980512	0.999188	Zfp655	zinc finger protein 655	5	10.8038	10.7386	10.653	10.7082	10.6099	10.6393	10.5192	10.6993	10.7779	10.9216	10.5216
ENSMUSG00000007815	3545.31	0.0137117	0.0626	0.333504	0.935103	Rhoa	ras homolog family member A	9	13.0108	12.0414	12.4907	12.2961	12.1319	12.3162	12.0893	12.1096	12.4461	12.1706	12.3381
ENSMUSG00000007817	1349.14	-0.0525383	0.0955656	0.0121566	0.597874	Zmiz1	zinc finger, MIZ-type containing 1	14	11.2234	11.6208	11.4595	11.377	11.1152	11.395	11.5823	11.5692	11.5881	11.8395	11.718
ENSMUSG00000007827	263.379	-0.0138069	0.0643026	0.00103131	0.15904	Ankrd26	ankyrin repeat domain 26	6	9.99836	9.95511	10.3112	10.5407	10.3246	10.3925	11.2826	10.6401	10.2366	10.3733	11.1045
ENSMUSG00000007833	116.932	-0.00101755	0.0620601	0.606458	0.939563	Aldh16a1	aldehyde dehydrogenase 16 family, member A1	7	9.95847	10.129	10.3289	10.2807	10.2604	10.376	10.0911	10.683	10.0787	10.0437	10.1394
ENSMUSG00000007836	954.521	-0.0141691	0.060419	0.472477	0.935103	Hnrnpa0	heterogeneous nuclear ribonucleoprotein A0	13	11.1115	11.3963	11.2893	11.2219	11.2375	11.0817	11.2194	11.2708	11.36	11.3153	11.2407
ENSMUSG00000007837	4.6522	-1.57819e-05	0.0620973	0.994534	0.999188	Prrg2	proline-rich Gla (G-carboxyglutamic acid) polypeptide 2	7	9.85546	9.85546	9.94048	9.74762	9.842	9.89226	9.85546	9.85546	9.90464	9.9136	9.74762
ENSMUSG00000007850	1400.04	0.00743254	0.0616267	0.528431	0.935103	Hnrnph1	heterogeneous nuclear ribonucleoprotein H1	11	11.0454	12.1504	11.5383	11.3795	11.6175	11.4206	11.4093	11.3722	11.5571	11.5075	11.4396
ENSMUSG00000007872	86.7729	0.00234083	0.061548	0.782712	0.97236	Id3	inhibitor of DNA binding 3	4	10.1436	10.2394	10.3334	10.098	10.2455	10.2538	10.1656	10.2812	10.1037	10.2883	10.1294
ENSMUSG00000007880	3255.66	-0.00187438	0.0606777	0.88286	0.987779	Arid1a	AT rich interactive domain 1A (SWI-like)	4	12.4193	12.0031	11.7929	12.8018	12.0473	12.16	12.1602	12.3419	12.0217	12.443	12.3511
ENSMUSG00000007888	1.52014	-0.000894251	0.0621241	0.33335	0.935103	Crlf1	cytokine receptor-like factor 1	8	9.82108	9.82108	9.782	9.782	9.82421	9.782	9.82108	9.82108	9.82557	9.782	9.9698
ENSMUSG00000007891	282.803	-0.0026717	0.0611298	0.812425	0.975766	Ctsd	cathepsin D	7	10.6866	10.6398	10.5028	10.4748	10.4403	10.6423	10.5817	10.3942	10.8049	10.5865	10.5773
ENSMUSG00000007892	19709.8	0.00405354	0.0503988	0.902776	0.990762	Rplp1	ribosomal protein, large, P1	9	14.4762	14.3984	14.3645	14.491	14.5134	14.3172	14.4143	14.4025	14.4966	14.4092	14.3679
ENSMUSG00000007950	58.4621	0.00166179	0.0620546	0.605156	0.939563	Abhd8	abhydrolase domain containing 8	8	10.6177	9.92753	10.1372	10.0773	10.0944	10.0619	10.1291	9.79147	10.137	10.1955	10.1119
ENSMUSG00000007987	165.482	0.00464999	0.0621199	0.410215	0.935103	Ift22	intraflagellar transport 22	5	10.0632	10.779	10.2729	10.3689	10.311	10.7599	10.2869	10.4704	10.5118	10.3287	10.2459
ENSMUSG00000007989	10.0462	-0.000228748	0.0621132	0.632659	0.945707	Fzd3	frizzled class receptor 3	14	9.75808	10.233	9.845	9.845	9.9047	9.845	9.75808	9.75808	10.0079	9.845	9.845
ENSMUSG00000008035	242.128	-0.0159278	0.0647518	0.0235265	0.724387	Mid1ip1	Mid1 interacting protein 1 (gastrulation specific G12-like (zebrafish))	X	10.3375	10.1213	10.4596	10.3176	10.5361	10.5877	10.4843	11.132	10.6581	10.5976	10.4747
ENSMUSG00000008036	257.946	-0.0107442	0.0629124	0.186233	0.935103	Ap2s1	adaptor-related protein complex 2, sigma 1 subunit	7	10.4978	10.3589	10.3597	10.7312	10.5852	10.412	10.4335	10.9358	10.8052	10.557	10.4452
ENSMUSG00000008090	3.34928	-0.000100977	0.0621099	0.884202	0.988057	Fgfrl1	fibroblast growth factor receptor-like 1	5	9.96495	9.80987	9.79321	9.79321	9.91258	9.79321	9.80987	9.80987	9.79321	9.85192	10.0031
ENSMUSG00000008129	35.8696	-0.00236486	0.0621357	0.319569	0.935103	Brme1	break repair meiotic recombinase recruitment factor 1	8	10.3063	9.81874	9.87343	10.0245	10.0368	9.97572	10.271	9.72965	9.917	10.1357	10.2569
ENSMUSG00000008140	497.036	1.50887e-05	0.061242	0.992485	0.999188	Emc10	ER membrane protein complex subunit 10	7	10.5831	10.9646	10.6134	11.031	10.8408	10.839	11.0959	10.6007	10.8324	10.8216	10.6993
ENSMUSG00000008167	7.45314	0.000253728	0.062099	0.892066	0.989436	Fbxw9	F-box and WD-40 domain protein 9	8	9.866	9.866	9.73708	9.85413	9.97187	9.96563	9.866	9.866	9.73708	9.99268	9.80352
ENSMUSG00000008193	2494.04	0.00856485	0.0598535	0.571916	0.935103	Spib	Spi-B transcription factor (Spi-1/PU.1 related)	7	11.7898	12.0365	11.9022	12.0263	11.8334	11.8017	12.0492	11.5885	11.9354	11.7798	11.7832
ENSMUSG00000008200	631.479	0.000733722	0.0615584	0.92948	0.993631	Fnbp4	formin binding protein 4	2	10.8768	10.6304	11.1626	11.1983	11.1513	10.7872	11.3867	10.9495	10.6254	11.0891	10.712
ENSMUSG00000008206	343.765	-0.0114393	0.063346	0.0677727	0.911911	Cers4	ceramide synthase 4	8	10.1886	10.488	10.3801	10.8724	10.5838	10.567	10.6087	11.2672	10.5578	10.9968	10.509
ENSMUSG00000008226	89.8503	0.00492228	0.0623501	0.0698988	0.921091	Scrn3	secernin 3	2	9.88868	10.7807	9.88445	10.516	10.1203	10.28	9.88422	10.0769	10.0712	10.0218	10.2096
ENSMUSG00000008301	223.149	-0.00773092	0.0622223	0.366912	0.935103	Phax	phosphorylated adaptor for RNA export	18	10.741	10.2905	10.2271	10.4996	10.453	10.5605	10.5846	10.4225	10.5205	10.5668	10.7399
ENSMUSG00000008305	42.3904	-0.000764268	0.0620478	0.792187	0.973783	Tle1	transducin-like enhancer of split 1	4	10.3284	9.85409	10.0878	9.96781	10.0054	9.9993	10.174	9.85409	9.95776	10.0112	10.3392
ENSMUSG00000008307	39.7229	-0.0015653	0.062056	0.603077	0.938912	1700109H08Rik	RIKEN cDNA 1700109H08 gene	5	9.85737	10.0693	10.0766	9.81329	10.2913	10.0082	10.2278	10.0321	9.8689	10.1656	10.1026
ENSMUSG00000008318	216.176	0.00540536	0.0623425	0.108382	0.935103	Relt	RELT tumor necrosis factor receptor	7	10.2168	10.4225	10.6505	11.0985	10.4146	10.1408	10.1718	10.6667	10.1035	10.0313	10.1469
ENSMUSG00000008333	337.792	-0.019542	0.0656934	0.071473	0.921091	Snrpb2	U2 small nuclear ribonucleoprotein B	2	10.4602	10.5002	10.6248	10.521	10.5513	10.8918	10.7608	11.0057	10.7986	10.7327	10.6521
ENSMUSG00000008348	2542.35	-0.00967182	0.055526	0.71169	0.963116	Ubc	ubiquitin C	5	12.0547	12.0671	12.0759	11.9994	12.051	12.0102	12.1054	11.986	12.2039	11.942	12.0906
ENSMUSG00000008373	416.517	-0.00739462	0.0611425	0.593081	0.936505	Prpf31	pre-mRNA processing factor 31	7	10.7354	10.8569	10.9491	10.7682	10.6993	10.5507	10.7801	10.7583	10.8821	10.8744	10.755
ENSMUSG00000008384	95.7609	0.00323709	0.0621803	0.198021	0.935103	Sertad1	SERTA domain containing 1	7	10.7062	10.331	10.2967	9.82977	10.3372	10.3118	10.0153	9.77331	10.2159	10.2267	10.2272
ENSMUSG00000008393	51.9902	0.00430449	0.0622842	0.103603	0.935103	Carhsp1	calcium regulated heat stable protein 1	16	9.86264	10.5236	10.0894	10.1276	10.133	10.1753	9.86264	10.0451	9.86364	9.98225	10.1433
ENSMUSG00000008398	843.911	0.00678784	0.0605942	0.663114	0.951181	Elk3	ELK3, member of ETS oncogene family	10	11.3205	10.9144	11.2269	11.013	11.1735	11.3227	11.2756	11.0706	11.099	11.1616	11.0203
ENSMUSG00000008429	477.78	0.00606131	0.0610461	0.648197	0.948441	Herpud2	HERPUD family member 2	9	11.0817	10.7278	10.7378	10.8258	10.6882	10.7809	10.648	10.7238	10.7928	10.8743	10.8673
ENSMUSG00000008435	139.406	-0.00708054	0.0625218	0.150981	0.935103	Rdh13	retinol dehydrogenase 13 (all-trans and 9-cis)	7	10.091	10.325	10.1513	10.189	10.4149	10.3257	10.0148	10.8178	10.2324	10.7099	10.1617
ENSMUSG00000008438	1.71768	-7.26687e-05	0.0621128	0.753635	0.969546	Adam21	a disintegrin and metallopeptidase domain 21	12	9.77881	9.98441	9.82428	9.82428	9.82428	9.82428	9.77881	9.77881	9.82428	9.86579	9.82428
ENSMUSG00000008450	156.657	-0.0141198	0.0634401	0.208783	0.935103	Nutf2	nuclear transport factor 2	8	10.5058	10.2017	10.318	10.401	10.3058	10.4435	10.3857	10.5262	10.4458	10.5283	10.3917
ENSMUSG00000008475	1057.1	0.00636175	0.0596729	0.723528	0.9653	Arpc5	actin related protein 2/3 complex, subunit 5	1	11.3441	11.2918	11.4668	11.0924	11.3722	11.3565	11.4473	11.1424	11.2466	11.2693	11.3409
ENSMUSG00000008496	622.67	-0.0253151	0.0684735	0.0532063	0.854262	Pou2f2	POU domain, class 2, transcription factor 2	7	11.0193	10.5728	11.0124	10.8071	10.9099	10.9164	11.346	10.9671	11.2548	10.8971	11.0362
ENSMUSG00000008540	43.5748	-0.00508475	0.0622676	0.239012	0.935103	Mgst1	microsomal glutathione S-transferase 1	6	9.85189	10.1245	9.99162	9.9996	10.1814	10.112	10.4138	9.98607	10.0644	10.1122	10.1971
ENSMUSG00000008575	9.13936	6.79362e-05	0.0620816	0.953193	0.996715	Nfib	nuclear factor I/B	4	9.9747	9.99893	9.83964	9.83964	9.98582	9.97686	9.76344	9.95334	9.83964	10.0706	9.90608
ENSMUSG00000008604	234.438	0.00289556	0.0619799	0.55826	0.935103	Ubqln4	ubiquilin 4	3	10.6832	10.3466	10.742	10.258	10.4527	10.6032	10.7161	10.0602	10.1691	10.6417	10.2939
ENSMUSG00000008658	2.97504	-0.000559185	0.0621198	0.544878	0.935103	Rbfox1	RNA binding protein, fox-1 homolog (C. elegans) 1	16	9.76706	9.76706	9.83602	9.83602	9.83602	9.83602	10.0429	9.76706	9.83602	9.83602	9.83602
ENSMUSG00000008668	12068	0.000643578	0.0505824	0.983927	0.999188	Rps18	ribosomal protein S18	17	13.8207	13.7934	13.726	13.8073	13.8255	13.7697	13.8033	13.7376	13.8991	13.6689	13.8247
ENSMUSG00000008682	9395.47	0.0128793	0.0579518	0.585155	0.935103	Rpl10	ribosomal protein L10	X	13.7417	13.2331	13.4288	13.4885	13.596	13.4571	13.3542	13.5356	13.4698	13.4231	13.3996
ENSMUSG00000008683	9291.15	0.0488305	0.070456	0.167707	0.935103	Rps15a	ribosomal protein S15A	7	13.4269	13.5113	13.478	13.632	13.5846	13.5043	13.3948	13.5497	13.3002	13.405	13.3905
ENSMUSG00000008690	537.538	0.00222814	0.0612214	0.859535	0.984637	Ncaph2	non-SMC condensin II complex, subunit H2	15	10.885	11.0173	10.6844	11.2489	10.8362	10.7145	10.9452	10.7143	11.013	11.0326	10.7036
ENSMUSG00000008730	2680.58	0.0193	0.0607031	0.419992	0.935103	Hipk1	homeodomain interacting protein kinase 1	3	11.9151	12.1295	11.9542	12.2052	11.9755	12.1181	12.1218	11.8938	11.9424	12.0254	11.8843
ENSMUSG00000008763	903.254	-0.00485143	0.0618784	0.518759	0.935103	Man1a2	mannosidase, alpha, class 1A, member 2	3	11.1746	10.5626	11.2077	10.7767	11.3428	11.4351	11.1373	11.7059	10.801	11.1603	11.2922
ENSMUSG00000008822	23.3817	-0.00357332	0.0622085	0.236238	0.935103	Acyp1	acylphosphatase 1, erythrocyte (common) type	12	9.82086	10.0975	9.82433	9.86499	10.0208	9.97075	10.2141	9.82086	10.0772	10.1005	10.0598
ENSMUSG00000008845	8.64236	-0.00189619	0.0621583	0.0373182	0.794174	Cd163	CD163 antigen	6	9.85422	9.85422	9.74886	9.74886	9.80856	9.74886	9.85422	9.85422	10.1742	9.91994	9.83023
ENSMUSG00000008855	226.644	-0.0054183	0.0615989	0.601671	0.938271	Hdac5	histone deacetylase 5	11	10.6044	10.4071	10.2938	10.6675	10.608	10.4587	10.5735	10.5443	10.6631	10.5598	10.4754
ENSMUSG00000008859	240.303	-0.00102611	0.0617385	0.871191	0.986858	Rala	v-ral simian leukemia viral oncogene A (ras related)	13	10.3655	10.4571	10.5583	10.6429	10.4713	10.4704	10.8507	10.2406	10.2024	10.5067	10.4974
ENSMUSG00000008892	458.645	0.0161094	0.0639496	0.128673	0.935103	Vdac3	voltage-dependent anion channel 3	8	11.1875	10.7712	10.7257	10.8213	10.799	10.9892	10.7023	10.585	10.8635	10.6312	10.8504
ENSMUSG00000008958	328.193	0.0296769	0.0719544	0.0134217	0.613922	Vps72	vacuolar protein sorting 72	3	10.9729	10.728	10.7081	10.8263	10.7672	10.5552	10.2961	10.6121	10.6035	10.5987	10.5069
ENSMUSG00000008976	695.25	-0.0114303	0.0605238	0.53641	0.935103	Gabpa	GA repeat binding protein, alpha	16	11.0039	11.0655	11.0844	11.0141	11.1213	10.9358	11.234	10.9268	11.0368	11.1931	11.0174
ENSMUSG00000009013	891.402	0.0114982	0.0616501	0.45288	0.935103	Dynll1	dynein light chain LC8-type 1	5	11.4375	11.1089	11.1344	11.1062	11.3868	11.2443	11.3252	10.9216	11.2878	11.1101	11.1187
ENSMUSG00000009030	396.654	0.0176998	0.0645838	0.151576	0.935103	Pdcl	phosducin-like	2	10.9353	10.6386	10.8314	10.9341	10.5399	10.7628	10.5041	10.7814	10.6502	10.6529	10.6326
ENSMUSG00000009035	282.329	0.000395824	0.0613267	0.977876	0.999188	Tmem184b	transmembrane protein 184b	15	10.537	10.6314	10.8328	10.4988	10.5265	10.6529	10.8314	10.445	10.4691	10.5259	10.7726
ENSMUSG00000009073	342.256	-0.00490003	0.0621391	0.338722	0.935103	Nf2	neurofibromin 2	11	10.2811	10.5473	10.7174	10.2701	10.6373	10.915	10.374	11.3445	10.678	10.365	10.8743
ENSMUSG00000009076	107.461	-0.00154885	0.0619406	0.739234	0.968082	Zmat5	zinc finger, matrin type 5	11	10.5316	9.8677	10.3547	10.2195	10.3082	10.1307	10.5995	10.0716	10.2614	10.2855	10.3129
ENSMUSG00000009079	1749.57	-0.0149574	0.063848	0.149279	0.935103	Ewsr1	Ewing sarcoma breakpoint region 1	11	11.4424	11.2945	11.9349	11.5781	11.2889	11.6225	12.4873	11.3635	11.6335	11.7568	11.7137
ENSMUSG00000009090	902.023	-0.0355046	0.0723175	0.105	0.935103	Ap1b1	adaptor protein complex AP-1, beta 1 subunit	11	11.3491	11.0081	11.1906	11.1723	11.0897	11.2366	11.1594	11.4092	11.303	11.2967	11.3314
ENSMUSG00000009092	44.7813	0.00836317	0.0627963	0.0714076	0.921091	Derl3	Der1-like domain family, member 3	10	10.1296	10.2618	10.2924	10.1017	9.99125	10.0742	10.0709	9.86128	10.0368	10.0137	10.0564
ENSMUSG00000009108	5.59756	0.000185185	0.062116	0.47082	0.935103	Gnat2	guanine nucleotide binding protein, alpha transducing 2	3	9.76839	9.76839	9.83469	9.83469	9.98087	9.83469	9.76839	10.1171	9.83469	9.83469	9.83469
ENSMUSG00000009112	396.64	-0.001744	0.061689	0.939849	0.995532	Bcl2l13	BCL2-like 13 (apoptosis facilitator)	6	10.4844	10.6626	10.6635	10.6076	11.0571	10.8194	10.4796	11.2375	10.7071	10.6381	10.5193
ENSMUSG00000009145	1.11856	-0.00096051	0.0621269	0.284967	0.935103	Dqx1	DEAQ RNA-dependent ATPase	6	9.81363	9.81363	9.78945	9.78945	9.78945	9.78945	9.81363	9.81363	9.78945	9.78945	9.95875
ENSMUSG00000009207	185.21	0.00569848	0.061526	0.586042	0.935103	Lnpk	lunapark, ER junction formation factor	2	10.4617	10.5494	10.5119	10.5361	10.511	10.254	10.2965	10.5013	10.526	10.3993	10.4273
ENSMUSG00000009246	1.34798	0.000658856	0.0621194	0.444669	0.935103	Trpm5	transient receptor potential cation channel, subfamily M, member 5	7	9.82098	9.82098	9.84166	9.7821	9.7821	9.95321	9.82098	9.82098	9.7821	9.82362	9.7821
ENSMUSG00000009281	13.504	-0.00135548	0.0621373	0.0766052	0.925479	Rarres2	retinoic acid receptor responder (tazarotene induced) 2	6	9.73681	9.73681	9.86627	9.86627	9.86627	9.86627	9.73681	10.3127	9.86627	9.96794	9.86627
ENSMUSG00000009291	339.502	0.0122989	0.0635053	0.100326	0.935103	Pttg1ip	pituitary tumor-transforming 1 interacting protein	10	10.7852	11.1071	10.6588	10.4956	10.5633	10.7438	10.245	10.3834	10.6549	10.7385	10.5563
ENSMUSG00000009292	283.426	-0.00013391	0.0619226	0.967763	0.998305	Trpm2	transient receptor potential cation channel, subfamily M, member 2	10	10.323	10.558	10.6214	10.768	10.3049	10.7348	10.0547	11.1802	10.4485	10.4425	10.3826
ENSMUSG00000009293	173.201	0.000127149	0.0617768	0.986261	0.999188	Ube2g2	ubiquitin-conjugating enzyme E2G 2	10	10.5916	10.136	10.681	10.3058	10.312	10.2449	10.2356	10.5712	10.1992	10.5351	10.4071
ENSMUSG00000009378	0.739063	-0.000936959	0.062126	0.370833	0.935103	Slc16a12	solute carrier family 16 (monocarboxylic acid transporters), member 12	19	9.81137	9.81137	9.79171	9.79171	9.79171	9.79171	9.81137	9.81137	9.79171	9.92936	9.79171
ENSMUSG00000009406	109.399	-0.00363167	0.0617628	0.652135	0.948676	Elk1	ELK1, member of ETS oncogene family	X	10.3047	10.3062	10.3166	10.2963	10.1792	10.2425	10.4721	10.0511	10.3639	10.3333	10.2529
ENSMUSG00000009418	15.336	-0.00282072	0.0622118	0.00185676	0.231421	Nav1	neuron navigator 1	1	9.75932	9.75932	9.84376	9.84376	9.84376	9.84376	9.75932	10.3112	9.88733	10.1279	9.89074
ENSMUSG00000009470	1385.2	-0.00455155	0.0601647	0.880735	0.987779	Tnpo1	transportin 1	13	11.3645	11.5739	11.3728	11.4261	11.8188	11.2761	11.3883	11.6097	11.5559	11.5895	11.3495
ENSMUSG00000009535	298.752	0.00983978	0.0626422	0.263261	0.935103	Rnmt	RNA (guanine-7-) methyltransferase	18	10.5053	10.8674	10.6593	10.6956	10.5661	10.6789	10.7808	10.2308	10.4547	10.6303	10.4873
ENSMUSG00000009549	664.945	0.0187178	0.064803	0.169064	0.935103	Srp14	signal recognition particle 14	2	11.3504	11.113	11.1444	11.1381	10.9611	10.8433	10.6394	10.9641	11.0178	11.0311	10.9813
ENSMUSG00000009555	580.366	-0.00212764	0.0612806	0.833247	0.977809	Cdk9	cyclin-dependent kinase 9 (CDC2-related kinase)	2	10.6014	11.2451	10.9113	10.7876	10.874	10.7159	10.6788	10.9967	11.0474	10.9073	10.9198
ENSMUSG00000009563	141.612	0.00100494	0.0618509	0.867365	0.986762	Tor2a	torsin family 2, member A	2	10.7085	10.0342	10.2289	10.3429	10.2624	10.4519	10.1075	10.499	10.2887	10.3108	10.4756
ENSMUSG00000009566	66.1331	-0.00242356	0.062113	0.359318	0.935103	Fpgs	folylpolyglutamyl synthetase	2	9.84802	10.1923	10.0074	10.0492	10.0115	10.2933	10.5849	9.84802	10.2532	10.1889	10.0246
ENSMUSG00000009569	368.669	-0.00899478	0.0624301	0.270187	0.935103	Mrtfb	myocardin related transcription factor B	16	10.3411	10.7272	10.7533	10.4737	10.5416	10.9244	10.8576	10.8593	10.6878	10.5288	10.9648
ENSMUSG00000009575	652.18	0.0062119	0.0617013	0.537905	0.935103	Cbx5	chromobox 5	15	11.0584	10.7732	11.0155	10.9367	11.2525	11.1441	10.763	11.3609	10.6779	10.8996	10.9958
ENSMUSG00000009585	2402.42	-0.00972562	0.0586959	0.623419	0.943149	Apobec3	apolipoprotein B mRNA editing enzyme, catalytic polypeptide 3	15	11.7811	12.1542	11.9348	12.0557	11.9642	11.8176	11.8738	12.0908	11.9711	12.0987	11.9829
ENSMUSG00000009614	5.97263	0.00052187	0.0621103	0.50437	0.935103	Sardh	sarcosine dehydrogenase	2	9.76467	10.1451	9.83841	9.83841	9.88062	9.88416	9.76467	9.76467	9.90002	9.83841	9.83841
ENSMUSG00000009621	1165.69	-0.00749996	0.0614879	0.538833	0.935103	Vav2	vav 2 oncogene	2	10.8387	11.5425	11.3651	11.2256	11.3848	11.2944	11.2875	11.6183	11.3108	11.4374	11.2343
ENSMUSG00000009630	221.139	-0.00327233	0.0613427	0.750593	0.969515	Ppp2cb	protein phosphatase 2 (formerly 2A), catalytic subunit, beta isoform	8	10.5508	10.6141	10.4428	10.3096	10.5388	10.6075	10.533	10.3789	10.6908	10.4524	10.5925
ENSMUSG00000009633	6.0645	-0.000567074	0.0621199	0.533576	0.935103	G0s2	G0/G1 switch gene 2	1	9.75239	9.75239	9.85069	9.85069	9.85069	9.85069	10.1456	9.75239	9.85069	9.85069	9.85069
ENSMUSG00000009640	80.9437	0.00442869	0.0622041	0.310598	0.935103	Dmap1	DNA methyltransferase 1-associated protein 1	4	9.92353	10.4797	10.2981	10.0787	10.1692	10.3768	10.0675	10.2402	10.1478	9.91904	10.2544
ENSMUSG00000009647	69.8625	-0.00252647	0.0620324	0.530427	0.935103	Mcu	mitochondrial calcium uniporter	10	9.81319	10.1831	10.1904	10.2513	10.2249	10.1285	10.3438	10.3602	10.0751	10.1995	10.1559
ENSMUSG00000009681	242.194	0.00594244	0.0621834	0.365009	0.935103	Bcr	BCR activator of RhoGEF and GTPase	10	10.4281	10.5835	10.9087	10.7421	10.3013	10.2638	10.2146	10.7114	10.4149	10.4231	10.3369
ENSMUSG00000009687	181.439	-0.0167118	0.0642544	0.155237	0.935103	Fxyd5	FXYD domain-containing ion transport regulator 5	7	10.2472	10.4796	10.4238	10.3812	10.4422	10.5046	10.5565	10.5586	10.3888	10.4536	10.6291
ENSMUSG00000009733	78.8817	-0.00305466	0.0621362	0.265856	0.935103	Tfcp2	transcription factor CP2	15	10.4395	10.2446	10.0412	9.97678	10.0418	10.0575	9.94279	10.0699	10.3726	10.2159	10.5135
ENSMUSG00000009739	228.128	-0.00728294	0.0621368	0.383827	0.935103	Pou6f1	POU domain, class 6, transcription factor 1	15	10.4636	10.5909	10.2878	10.4516	10.334	10.7174	10.3864	10.626	10.4406	10.7867	10.5992
ENSMUSG00000009741	371.858	0.427594	0.533388	0.00489613	0.390719	Ubp1	upstream binding protein 1	9	10.944	10.612	10.6925	10.7059	10.8781	10.9105	10.6807	10.5252	10.5566	10.4844	10.6052
ENSMUSG00000009772	477.22	0.0163019	0.0642228	0.149122	0.935103	Nuak2	NUAK family, SNF1-like kinase, 2	1	11.1314	10.651	10.9588	10.7407	10.9417	10.8238	10.8738	10.5545	10.5511	10.8193	10.7833
ENSMUSG00000009828	42.0972	-0.00521246	0.0622752	0.258095	0.935103	Cilk1	ciliogenesis associated kinase 1	9	9.82144	10.1947	9.99778	10.1638	9.99242	10.0821	10.0687	10.2947	10.025	10.2152	10.1879
ENSMUSG00000009863	372.633	-0.00594577	0.0609563	0.659998	0.950008	Sdhb	succinate dehydrogenase complex, subunit B, iron sulfur (Ip)	4	10.74	10.4645	10.7343	10.7823	10.7639	10.6924	10.8809	10.775	10.7033	10.6202	10.7095
ENSMUSG00000009894	120.566	0.00495749	0.0620253	0.471979	0.935103	Snap47	synaptosomal-associated protein, 47	11	10.6033	10.1037	10.1387	10.3313	10.3405	10.3413	10.2809	10.1826	10.2745	10.2863	10.336
ENSMUSG00000009905	277.187	-0.0023084	0.0610899	0.837403	0.978473	Kdsr	3-ketodihydrosphingosine reductase	1	10.538	10.5926	10.3373	10.5985	10.6363	10.5215	10.6758	10.3766	10.5764	10.4863	10.6641
ENSMUSG00000009907	870.076	9.72591e-06	0.0605101	0.99063	0.999188	Vps4b	vacuolar protein sorting 4B	1	11.3292	10.8779	11.1517	11.2278	11.1411	10.9233	10.9596	11.2773	11.0263	11.1388	11.1682
ENSMUSG00000009927	5125.03	0.00334105	0.0580891	0.874508	0.98732	Rps25	ribosomal protein S25	9	13.041	12.5513	12.6521	12.8695	12.8128	12.7199	12.5477	12.927	12.7525	12.7164	12.8441
ENSMUSG00000009941	1.24449	0.000741852	0.0621224	0.327337	0.935103	Nxf2	nuclear RNA export factor 2	X	9.8143	9.8143	9.96736	9.78879	9.78879	9.78879	9.8143	9.8143	9.78879	9.78879	9.78879
ENSMUSG00000009995	316.047	0.0163656	0.0644196	0.12207	0.935103	Taz	tafazzin	X	10.6679	10.665	10.9177	10.8388	10.611	10.4488	10.412	10.7496	10.5109	10.5504	10.4877
ENSMUSG00000010021	21.2899	-0.000684354	0.062101	0.481636	0.935103	Kif19a	kinesin family member 19A	11	9.84175	9.84175	9.9879	10.1336	9.94033	9.90597	10.2868	9.84175	10.0563	9.76133	9.8856
ENSMUSG00000010025	300.117	-0.0285172	0.0702246	0.0487944	0.845307	Aldh3a2	aldehyde dehydrogenase family 3, subfamily A2	11	10.575	10.4305	10.6952	10.5368	10.3779	10.5921	10.772	10.639	10.7183	10.6909	10.6175
ENSMUSG00000010045	184.238	-0.0032382	0.0618711	0.628227	0.944677	Tmem115	transmembrane protein 115	9	10.6187	10.2419	10.3631	10.2108	10.4402	10.5852	10.1076	10.7568	10.5999	10.3735	10.4461
ENSMUSG00000010047	35.168	-0.00339529	0.0621743	0.225726	0.935103	Hyal2	hyaluronoglucosaminidase 2	9	9.77563	9.98755	9.9306	9.87525	10.1945	10.1164	10.2953	10.1546	10.0536	10.0469	10.1556
ENSMUSG00000010048	57.1657	-0.000195099	0.0620149	0.947953	0.995781	Ifrd2	interferon-related developmental regulator 2	9	9.90633	10.2765	10.29	10.1246	10.1102	9.96982	9.84769	10.4165	10.0865	10.071	10.1302
ENSMUSG00000010051	16.3765	0.00242566	0.0621514	0.254575	0.935103	Hyal1	hyaluronoglucosaminidase 1	9	9.88858	10.0145	9.75662	10.0449	9.9493	10.0561	9.88858	9.88858	9.96067	9.7145	9.95835
ENSMUSG00000010054	179.97	0.00616066	0.0620913	0.421014	0.935103	Tusc2	tumor suppressor 2, mitochondrial calcium regulator	9	10.4399	10.6663	10.4286	10.2085	10.5561	10.5275	10.474	10.1373	10.572	10.321	10.392
ENSMUSG00000010057	44.7009	-0.00499606	0.0623684	0.0109075	0.576187	Nprl2	NPR2 like, GATOR1 complex subunit	9	9.84999	9.84999	9.98352	9.75309	10.1129	10.0526	10.1559	10.3663	10.2061	10.1141	10.1666
ENSMUSG00000010066	16.4858	0.00124989	0.0620959	0.661936	0.950391	Cacna2d2	calcium channel, voltage-dependent, alpha 2/delta subunit 2	9	9.89017	9.94161	9.77247	10.198	9.83952	9.82497	9.89017	9.89017	9.99815	9.97513	9.71291
ENSMUSG00000010067	86.4509	-0.0012906	0.0620019	0.706664	0.962252	Rassf1	Ras association (RalGDS/AF-6) domain family member 1	9	9.92452	10.1946	10.2004	10.368	10.22	10.2106	10.5634	10.1013	10.1625	10.0122	10.198
ENSMUSG00000010086	2.06312	0.000476587	0.0621187	0.540732	0.935103	Rnf112	ring finger protein 112	11	9.77281	10.0026	9.83027	9.83027	9.83027	9.83027	9.77281	9.77281	9.83027	9.83027	9.83027
ENSMUSG00000010095	465.009	-0.00479565	0.0616525	0.60026	0.938271	Slc3a2	solute carrier family 3 (activators of dibasic and neutral amino acid transport), member 2	19	10.5728	10.7512	10.9034	10.5623	10.6815	10.9889	11.0689	10.6585	10.8218	10.9278	10.4541
ENSMUSG00000010097	455.673	0.00904085	0.061827	0.44259	0.935103	Nxf1	nuclear RNA export factor 1	19	10.7513	10.6192	10.8888	10.9884	10.8124	10.8201	10.756	10.967	10.6921	10.6178	10.5941
ENSMUSG00000010110	357.273	0.000213682	0.0611349	0.987041	0.999188	Stx5a	syntaxin 5A	19	10.5111	10.6249	10.8596	10.6169	10.7997	10.6275	10.9169	10.613	10.5805	10.6752	10.506
ENSMUSG00000010136	2.82535	0.000351606	0.062111	0.775315	0.970851	Pifo	primary cilia formation	3	9.82769	9.82769	9.77539	9.77539	10.0102	9.77539	9.82769	9.82769	9.77539	9.90664	9.77539
ENSMUSG00000010142	1900.2	-0.0102242	0.0610267	0.522788	0.935103	Tnfrsf13b	tumor necrosis factor receptor superfamily, member 13b	11	11.8553	11.4801	11.841	11.6299	11.8858	11.6121	11.6324	12.0501	11.8443	11.5402	11.9281
ENSMUSG00000010175	6.5222	-0.000566026	0.0621199	0.532762	0.935103	Prox1	prospero homeobox 1	1	9.75058	9.75058	9.8525	9.8525	9.8525	9.8525	10.1583	9.75058	9.8525	9.8525	9.8525
ENSMUSG00000010205	814.812	0.0156853	0.0614312	0.419501	0.935103	Raver1	ribonucleoprotein, PTB-binding 1	9	11.1291	11.1138	11.1004	11.1077	11.1011	10.9986	11.1332	10.8772	11.0036	10.9678	11.1641
ENSMUSG00000010277	1572.39	-0.0219915	0.0661107	0.123764	0.935103	2610507B11Rik	RIKEN cDNA 2610507B11 gene	11	11.331	11.5446	11.6057	11.46	11.7077	11.3546	12.1728	11.34	11.6044	11.8092	11.6383
ENSMUSG00000010290	106.483	-0.00196364	0.0615665	0.808965	0.974959	AI597479	expressed sequence AI597479	1	10.1033	10.3443	10.2897	10.3384	10.345	10.1754	10.4277	10.2233	10.2944	10.2709	10.2087
ENSMUSG00000010307	24.3861	-0.000812494	0.0620973	0.481	0.935103	Tmem86a	transmembrane protein 86A	7	9.88737	9.88737	10.1028	9.71571	9.96516	10.1159	9.88737	10.185	9.90044	9.93125	10.001
ENSMUSG00000010311	4.34813	-0.000563736	0.0621198	0.538029	0.935103	Optc	opticin	1	9.75988	9.75988	9.8432	9.8432	9.8432	9.8432	10.0931	9.75988	9.8432	9.8432	9.8432
ENSMUSG00000010358	227.78	-0.0194052	0.0658386	0.0475304	0.839017	Ifi35	interferon-induced protein 35	11	10.3064	10.3492	10.47	10.3342	10.3643	10.663	10.5356	10.7785	10.6145	10.5063	10.4948
ENSMUSG00000010362	54.3208	-0.00501281	0.0622708	0.251695	0.935103	Rdm1	RAD52 motif 1	11	9.83238	10.2642	10.1095	9.89712	10.0687	10.1031	10.0683	10.2988	10.1494	10.2994	10.1842
ENSMUSG00000010376	626.562	0.00802656	0.0614378	0.539092	0.935103	Nedd8	neural precursor cell expressed, developmentally down-regulated gene 8	14	11.2788	11.02	11.0947	10.908	10.9389	11.0079	11.0761	10.6189	11.1494	10.9326	10.9578
ENSMUSG00000010392	399.228	-0.0147821	0.0642995	0.0537992	0.854262	Gosr1	golgi SNAP receptor complex member 1	11	10.4867	10.7982	10.8585	10.3269	10.7754	10.3351	10.8423	10.8353	11.1375	11.014	10.7368
ENSMUSG00000010406	587.406	-0.000958484	0.0613878	0.925681	0.993436	Mrpl52	mitochondrial ribosomal protein L52	14	10.3614	11.3765	10.9973	10.824	10.9248	10.9981	10.9911	11.0313	11.0813	10.8678	10.8873
ENSMUSG00000010453	364.765	0.00443596	0.0617466	0.609289	0.939563	Kansl3	KAT8 regulatory NSL complex subunit 3	1	10.8449	10.4384	10.4647	11.0335	10.3347	10.7386	10.6137	10.6128	10.5716	10.4841	10.7648
ENSMUSG00000010461	1.14425	-0.000542411	0.0621193	0.573763	0.935103	Eya4	EYA transcriptional coactivator and phosphatase 4	10	9.78014	9.78014	9.82294	9.82294	9.82294	9.82294	9.95137	9.78014	9.82294	9.82294	9.82294
ENSMUSG00000010492	1.18385	-0.00096314	0.062127	0.272769	0.935103	Uckl1os	uridine-cytidine kinase 1-like 1, opposite strand	2	9.81398	9.81398	9.7891	9.7891	9.7891	9.7891	9.81398	9.81398	9.96327	9.7891	9.7891
ENSMUSG00000010505	1.22855	0.00061948	0.0621182	0.495677	0.935103	Myt1	myelin transcription factor 1	2	9.81712	9.81712	9.78596	9.78596	9.78596	9.95707	9.81712	9.81712	9.78596	9.78596	9.83294
ENSMUSG00000010517	319.409	-0.0101547	0.062312	0.343909	0.935103	Faf1	Fas-associated factor 1	4	10.4679	10.5583	10.69	10.6788	10.621	10.6603	10.9981	10.5758	10.5626	10.7964	10.5411
ENSMUSG00000010538	5.13332	-0.000499595	0.0621026	0.610534	0.939563	Tsacc	TSSK6 activating co-chaperone	3	9.82867	9.82867	9.90755	9.77442	9.8688	9.98392	9.9999	9.82867	9.86154	9.92969	9.77442
ENSMUSG00000010554	522.195	-0.00287487	0.0618883	0.627809	0.944345	Mettl16	methyltransferase like 16	11	10.2261	10.9846	10.5343	11.2387	10.5927	10.9832	10.6671	11.4104	10.8008	10.9343	10.6703
ENSMUSG00000010607	58.4104	-0.00343655	0.0620177	0.485371	0.935103	Pigyl	phosphatidylinositol glycan anchor biosynthesis, class Y-like	9	10.0426	10.0118	10.2872	10.0116	10.248	10.1596	10.3768	10.2163	10.0916	10.1251	10.2101
ENSMUSG00000010608	1753.11	-0.000561268	0.0601187	0.967043	0.998286	Rbm25	RNA binding motif protein 25	12	11.6867	11.3343	11.8103	11.8856	11.7773	11.722	11.971	11.884	11.4736	11.7046	11.6597
ENSMUSG00000010609	437.644	0.00392121	0.060703	0.775005	0.970758	Psen2	presenilin 2	1	10.784	10.8186	11.0298	10.6196	10.7372	10.8825	10.7131	10.9018	10.8317	10.7167	10.813
ENSMUSG00000010651	1.075	-0.000914043	0.0621258	0.291555	0.935103	Acaa1b	acetyl-Coenzyme A acyltransferase 1B	9	9.8134	9.8134	9.78968	9.78968	9.78968	9.78968	9.8134	9.8134	9.78968	9.95567	9.78968
ENSMUSG00000010663	2.92638	-0.000322855	0.0621088	0.809982	0.975147	Fads1	fatty acid desaturase 1	19	9.83529	9.83529	9.76779	9.76779	9.93656	9.76779	9.83529	9.83529	9.90552	9.93377	9.76779
ENSMUSG00000010721	14.7775	-0.000835035	0.0620996	0.411536	0.935103	Lmbr1	limb region 1	5	9.85621	9.85621	9.99215	9.74687	10.0033	10.0094	9.85621	10.1347	9.89131	9.80558	10.0322
ENSMUSG00000010751	115.204	0.00636257	0.062503	0.0869636	0.935103	Tnfrsf22	tumor necrosis factor receptor superfamily, member 22	7	9.96608	10.6952	10.0078	10.4018	10.1151	10.6637	10.0742	10.1575	10.0335	9.95804	10.3825
ENSMUSG00000010755	169.747	-0.00113121	0.061808	0.853209	0.982428	Cars	cysteinyl-tRNA synthetase	7	10.0483	10.6335	10.2136	10.4395	10.2806	10.6557	10.5955	10.3387	10.2653	10.4027	10.5705
ENSMUSG00000010797	2.63176	-0.000557582	0.0621197	0.547572	0.935103	Wnt2	wingless-type MMTV integration site family, member 2	6	9.7691	9.7691	9.83398	9.83398	9.83398	9.83398	10.0286	9.7691	9.83398	9.83398	9.83398
ENSMUSG00000010825	1.40753	-0.000547445	0.0621195	0.56577	0.935103	Grid2ip	glutamate receptor, ionotropic, delta 2 (Grid2) interacting protein 1	5	9.7778	9.7778	9.82528	9.82528	9.82528	9.82528	9.7778	9.9677	9.82528	9.82528	9.82528
ENSMUSG00000010911	74.8678	0.0106549	0.0631284	0.110159	0.935103	Apip	APAF1 interacting protein	2	10.4116	10.3126	10.0858	10.2514	10.2554	10.3326	9.93789	10.1927	10.153	10.2012	10.2165
ENSMUSG00000010914	135.194	0.000692096	0.0620011	0.832335	0.977617	Pdhx	pyruvate dehydrogenase complex, component X	2	10.044	10.1732	10.2515	10.505	10.5131	10.3994	10.3553	10.5347	10.1669	9.96937	10.1323
ENSMUSG00000010936	310.695	-0.0167464	0.0646246	0.0955741	0.935103	Vac14	Vac14 homolog (S. cerevisiae)	8	10.2966	10.7062	10.5793	10.3432	10.624	10.6822	10.7035	10.7969	10.875	10.616	10.6607
ENSMUSG00000011008	198.366	0.00469551	0.0622534	0.231921	0.935103	Mcoln2	mucolipin 2	3	9.9533	11.0796	10.3528	10.2249	10.3596	10.6545	10.1485	10.3339	10.2494	10.4532	10.3573
ENSMUSG00000011096	103.362	-0.0128892	0.0639282	0.0081583	0.513271	Akt1s1	AKT1 substrate 1 (proline-rich)	7	10.1079	10.0285	10.0533	9.91853	10.2721	10.2372	10.5517	10.1604	10.2424	10.3156	10.4457
ENSMUSG00000011114	495.572	-0.00995444	0.060814	0.545756	0.935103	Tbrg1	transforming growth factor beta regulated gene 1	9	10.8086	10.7417	10.7475	11.0087	10.8361	10.9038	11.0416	10.8671	10.8123	10.8635	10.8814
ENSMUSG00000011148	61.8574	-0.00266854	0.062136	0.322815	0.935103	Adssl1	adenylosuccinate synthetase like 1	12	9.9817	10.0093	9.92863	9.85569	10.2055	10.3544	10.5445	9.92208	9.9531	10.4432	10.0603
ENSMUSG00000011158	274.704	0.00819822	0.0624338	0.267072	0.935103	Brf1	BRF1, RNA polymerase III transcription initiation factor 90 kDa subunit	12	10.8858	10.6842	10.694	10.6083	10.5777	10.2342	10.2828	10.3881	10.6561	10.5416	10.6096
ENSMUSG00000011179	1356	0.00726236	0.0601355	0.664674	0.951577	Odc1	ornithine decarboxylase, structural 1	12	11.4569	11.2421	11.3563	11.5034	11.4755	11.0866	11.4321	11.2058	11.2347	11.422	11.2612
ENSMUSG00000011254	135.643	0.0034442	0.0619768	0.528988	0.935103	Thg1l	tRNA-histidine guanylyltransferase 1-like (S. cerevisiae)	11	10.6425	10.0619	10.3029	10.4712	10.4136	10.327	10.6033	10.042	10.3657	10.1648	10.317
ENSMUSG00000011256	1078.43	0.023954	0.067805	0.0533151	0.854262	Adam19	a disintegrin and metallopeptidase domain 19 (meltrin beta)	11	11.7379	11.0493	11.1784	11.7762	11.4723	11.1659	11.0784	11.2678	11.158	11.1392	11.0937
ENSMUSG00000011257	871.495	0.0119068	0.0610471	0.470597	0.935103	Pabpc4	poly(A) binding protein, cytoplasmic 4	4	11.39	11.1155	11.3573	10.9781	11.2026	11.1421	11.0677	11.1104	11.1429	11.2043	11.1691
ENSMUSG00000011263	2.36481	-9.82322e-05	0.062113	0.747657	0.969261	Exoc3l2	exocyst complex component 3-like 2	7	10.0162	9.77471	9.82837	9.82837	9.82837	9.82837	9.77471	9.77471	9.82837	9.82837	9.87536
ENSMUSG00000011267	190.901	-0.00107208	0.0618878	0.837432	0.978473	Zfp296	zinc finger protein 296	7	10.6418	10.0498	10.4103	10.5515	10.3858	10.3446	10.7396	10.1844	10.6915	10.2561	10.1875
ENSMUSG00000011306	265.831	-0.00895508	0.0622208	0.374785	0.935103	Sugp1	SURP and G patch domain containing 1	8	10.2736	10.7833	10.4174	10.4559	10.6489	10.628	10.68	10.5909	10.7298	10.5597	10.6339
ENSMUSG00000011382	77.4233	0.0010236	0.0619972	0.802051	0.974489	Dhdh	dihydrodiol dehydrogenase (dimeric)	7	10.4023	9.85943	10.1715	9.99822	10.4706	10.2007	10.0298	10.4472	10.2581	10.2054	9.9885
ENSMUSG00000011427	275.805	0.00279117	0.0615288	0.742649	0.968398	Zfp790	zinc finger protein 790	7	10.7982	10.4841	10.5613	10.6344	10.4448	10.75	10.8317	10.2484	10.5706	10.5431	10.63
ENSMUSG00000011632	5.11088	0.000789259	0.0621236	0.110523	0.935103	Pinlyp	phospholipase A2 inhibitor and LY6/PLAUR domain containing	7	9.83522	9.83522	9.76786	9.76786	10.1022	9.90508	9.83522	9.83522	9.76786	9.76786	9.76786
ENSMUSG00000011658	68.1975	-0.00111592	0.0619907	0.775791	0.971046	Fuz	fuzzy planar cell polarity protein	7	10.4969	9.89309	10.0466	10.1367	10.041	10.1265	10.1835	10.0387	10.3593	10.2106	10.1505
ENSMUSG00000011752	605.588	0.0108163	0.0627883	0.254443	0.935103	Pgam1	phosphoglycerate mutase 1	19	10.5746	11.2945	10.7611	11.3091	10.9185	10.8503	10.7108	10.9811	10.7416	10.7709	10.8802
ENSMUSG00000011831	46.015	-0.00142515	0.0620425	0.686781	0.956485	Evi5	ecotropic viral integration site 5	5	9.88276	10.2308	10.0539	9.8858	9.95886	10.2066	9.88276	10.2653	10.1184	10.1086	10.1259
ENSMUSG00000011832	141.623	-0.00148124	0.0619122	0.744535	0.968398	Evi5l	ecotropic viral integration site 5 like	8	10.1973	10.1216	10.1793	10.6504	10.3813	10.3945	10.3281	10.7569	10.2938	10.1855	10.3718
ENSMUSG00000011837	91.6866	0.00224776	0.0620525	0.542132	0.935103	Snapc2	small nuclear RNA activating complex, polypeptide 2	8	10.6902	9.78004	10.3189	10.2771	10.2178	10.0815	10.3447	10.0325	10.1275	10.1957	10.2646
ENSMUSG00000011877	243.85	0.001435	0.0617015	0.833419	0.977853	Git1	GIT ArfGAP 1	11	10.8339	10.7143	10.5022	10.2892	10.4317	10.6943	10.2496	10.3914	10.5644	10.649	10.7001
ENSMUSG00000011884	355.834	-0.0137373	0.0635036	0.179149	0.935103	Gltp	glycolipid transfer protein	5	10.6358	10.5307	10.4443	10.5151	10.4408	10.8274	10.4522	10.9047	10.7843	10.7891	10.615
ENSMUSG00000011958	557.76	-0.0154971	0.0644532	0.0513439	0.852077	Bnip2	BCL2/adenovirus E1B interacting protein 2	9	10.6729	10.443	10.642	11.1529	10.6357	10.865	11.4706	10.907	11.0248	11.105	10.6883
ENSMUSG00000011960	919.337	-0.0147852	0.0630479	0.27971	0.935103	Ccnt1	cyclin T1	15	10.9839	11.1148	11.2393	10.9752	11.0959	11.2048	11.5224	10.9884	11.105	11.0724	11.374
ENSMUSG00000012076	147.286	-0.00190118	0.0619617	0.694214	0.958904	Brms1l	breast cancer metastasis-suppressor 1-like	12	9.96189	10.7039	10.4856	10.0704	10.3273	10.2166	10.0719	10.5996	10.2887	10.4917	10.4598
ENSMUSG00000012114	764.302	-0.0103039	0.062823	0.187737	0.935103	Med15	mediator complex subunit 15	16	10.6512	10.7885	11.0493	11.0316	10.9949	11.2715	10.9566	11.8642	11.2368	10.7441	11.1277
ENSMUSG00000012117	177.937	-0.00448965	0.0620984	0.426701	0.935103	Dhdds	dehydrodolichyl diphosphate synthase	4	9.92689	10.749	10.4503	10.276	10.348	10.2374	10.3015	10.6385	10.4721	10.5238	10.5203
ENSMUSG00000012187	4.94297	-0.000745053	0.0621012	0.536256	0.935103	Mogat1	monoacylglycerol O-acyltransferase 1	1	9.82949	9.82949	10.0116	9.77359	9.85801	9.81935	9.82949	9.98752	9.871	9.92887	9.82058
ENSMUSG00000012296	137.554	-0.0182354	0.0654123	0.0515332	0.852077	Tjap1	tight junction associated protein 1	17	10.2566	10.3079	10.3279	10.2779	10.2207	10.3045	10.606	10.2056	10.5238	10.4838	10.2696
ENSMUSG00000012350	7.03896	-0.00120258	0.0621275	0.177693	0.935103	Ehf	ets homologous factor	2	9.80353	9.80353	9.95133	9.79955	9.79955	9.79955	9.80353	10.0667	9.84312	10.0926	9.79955
ENSMUSG00000012405	4935.52	0.00538944	0.0572391	0.793166	0.973783	Rpl15	ribosomal protein L15	14	13.0413	12.5576	12.7043	12.6445	12.799	12.7189	12.5929	12.7382	12.73	12.7937	12.7372
ENSMUSG00000012422	273.365	-0.00952831	0.0625554	0.262062	0.935103	Tmem167	transmembrane protein 167	13	10.565	10.2218	10.631	10.4979	10.7059	10.4884	10.6439	10.8807	10.4456	10.5457	10.7303
ENSMUSG00000012428	10.1803	0.0002439	0.0621167	0.235468	0.935103	Steap4	STEAP family member 4	5	9.76982	9.76982	9.91748	9.83326	9.91768	10.0218	10.2276	9.76982	9.83326	9.83326	9.83326
ENSMUSG00000012429	289.379	0.00192234	0.0613525	0.847759	0.980741	Mplkip	M-phase specific PLK1 intereacting protein	13	10.3211	10.7711	10.5803	10.5986	10.7373	10.5258	10.4822	10.7602	10.6288	10.5259	10.489
ENSMUSG00000012443	73.7736	-0.00194761	0.0618581	0.761765	0.969546	Kif11	kinesin family member 11	19	10.3719	10.1884	10.2965	9.99587	10.2428	10.0987	10.0794	10.2021	10.2187	10.3466	10.2739
ENSMUSG00000012483	40.2755	0.00184062	0.0618801	0.757589	0.969546	Rpa3	replication protein A3	6	9.97422	10.2344	10.1618	10.0704	9.98334	10.1289	10.1595	9.97964	10.1147	10.1115	10.0379
ENSMUSG00000012519	23.4739	-0.00206497	0.0621281	0.195106	0.935103	Mlkl	mixed lineage kinase domain-like	8	9.8582	9.8582	9.74488	10.0821	9.92388	10.1071	10.1002	10.0622	10.1636	9.81679	9.94951
ENSMUSG00000012535	611.975	0.0144928	0.0638868	0.143771	0.935103	Tnpo3	transportin 3	6	11.2452	11.2885	10.8397	10.9933	11.2265	10.8437	10.897	10.4083	11.1404	10.7901	10.8848
ENSMUSG00000012609	170.232	0.00451404	0.0621821	0.339683	0.935103	Ttll5	tubulin tyrosine ligase-like family, member 5	12	10.2853	10.7231	10.3166	10.5169	10.2973	10.3878	9.97427	10.4065	10.1017	10.5872	10.2237
ENSMUSG00000012640	314.568	0.0138322	0.0638347	0.0967225	0.935103	Zfp715	zinc finger protein 715	7	10.4581	11.0418	10.6437	10.3566	10.6921	10.8149	10.4361	10.4435	10.5155	10.6389	10.5023
ENSMUSG00000012819	3.51528	9.30314e-05	0.0621146	0.936011	0.994571	Cdh23	cadherin 23 (otocadherin)	10	9.77143	9.77143	9.83165	9.91443	9.83165	9.83165	9.77143	10.0596	9.83165	9.83165	9.83165
ENSMUSG00000012848	6801.47	0.0107478	0.0549651	0.69772	0.959373	Rps5	ribosomal protein S5	7	13.1905	12.9251	12.9584	13.0941	13.1913	13.1088	13.1298	13.0109	13.0206	13.0382	13.0373
ENSMUSG00000013076	5.49388	-0.00140777	0.0621398	0.0750508	0.924167	Amotl1	angiomotin-like 1	9	9.77007	9.77007	9.83301	9.83301	9.83301	9.83301	9.77007	10.1108	9.83301	9.83301	9.98876
ENSMUSG00000013083	12.5595	-0.000569027	0.0621199	0.527407	0.935103	2200002J24Rik	RIKEN cDNA 2200002J24 gene	7	9.73103	9.73103	9.87205	9.87205	9.87205	9.87205	9.73103	10.2951	9.87205	9.87205	9.87205
ENSMUSG00000013089	32.8962	0.00248741	0.0621854	0.0146875	0.627496	Etv5	ets variant 5	16	9.82132	10.5137	9.8404	10.1776	9.8404	10.1998	9.76268	9.76268	9.88397	9.8404	9.97324
ENSMUSG00000013150	60.4968	0.00325188	0.0622021	0.0656511	0.906843	Gfod2	glucose-fructose oxidoreductase domain containing 2	8	10.1114	9.97888	10.2983	9.86124	10.6983	9.9977	10.1159	10.1176	9.77846	9.94955	9.98309
ENSMUSG00000013158	4.74517	0.000488388	0.0621189	0.524176	0.935103	4933405L10Rik	RIKEN cDNA 4933405L10 gene	8	9.75803	10.1061	9.84505	9.84505	9.84505	9.84505	9.75803	9.75803	9.84505	9.84505	9.84505
ENSMUSG00000013160	368.305	0.00982466	0.0625087	0.309783	0.935103	Atp6v0d1	ATPase, H+ transporting, lysosomal V0 subunit D1	8	10.79	10.9585	10.6419	10.5745	10.6652	10.6899	10.6139	10.3203	10.7904	10.6999	10.633
ENSMUSG00000013236	114.837	0.00977438	0.0631704	0.00766411	0.499429	Ptprs	protein tyrosine phosphatase, receptor type, S	17	10.7656	10.1516	10.1726	10.7683	10.1463	10.0785	9.96366	10.0416	10.0573	10.2416	10.1498
ENSMUSG00000013275	306.522	-0.0067763	0.0621838	0.374232	0.935103	Slc41a1	solute carrier family 41, member 1	1	10.7258	10.6467	10.5264	10.4353	10.5425	10.6928	10.8319	10.2916	11.0977	10.4256	10.6477
ENSMUSG00000013415	2.04912	0.00157735	0.0620797	0.587263	0.935218	Igf2bp1	insulin-like growth factor 2 mRNA binding protein 1	11	9.89317	9.86169	9.85239	9.84063	9.87725	9.90489	9.81025	9.88478	9.8364	9.85154	9.8742
ENSMUSG00000013465	500.865	-0.0102558	0.0621343	0.435482	0.935103	Nelfb	negative elongation factor complex member B	2	10.983	10.7477	10.9566	10.8125	10.7266	10.8695	11.0841	10.7001	11.1731	10.7447	10.868
ENSMUSG00000013495	115.538	-0.000991717	0.0619425	0.82673	0.976517	Tmem175	transmembrane protein 175	5	9.86468	10.4428	10.1475	10.3916	10.3224	10.2671	10.2794	10.49	10.375	10.1913	10.1897
ENSMUSG00000013539	64.3961	9.22684e-05	0.0620133	0.987446	0.999188	Tango2	transport and golgi organization 2	16	10.4675	9.85706	9.98768	10.1091	10.1625	10.125	10.2352	9.94833	10.325	9.96156	10.2184
ENSMUSG00000013593	815.469	0.0239174	0.0669456	0.108166	0.935103	Ndufs2	NADH:ubiquinone oxidoreductase core subunit S2	1	11.36	11.2317	11.1475	11.1744	11.1006	11.07	11.0781	10.7352	10.9821	11.0306	11.2036
ENSMUSG00000013622	143.348	0.00276099	0.0617717	0.708726	0.963014	Atraid	all-trans retinoic acid induced differentiation factor	5	10.5674	10.2918	10.1649	10.3901	10.4591	10.4896	10.4644	10.1718	10.4637	10.1946	10.4547
ENSMUSG00000013629	611.365	0.00403402	0.0616182	0.659254	0.950008	Cad	carbamoyl-phosphate synthetase 2, aspartate transcarbamylase, and dihydroorotase	5	10.7778	11.4691	10.8028	10.7778	10.8748	11.2359	10.5779	11.0062	11.1275	11.0421	10.8437
ENSMUSG00000013646	239.802	0.00150621	0.0620189	0.672705	0.953515	Sh3bp5l	SH3 binding domain protein 5 like	11	10.3193	10.5166	10.5307	10.057	10.175	10.2947	10.2434	10.1528	11.1196	9.90634	10.0728
ENSMUSG00000013662	413.432	0.00250205	0.0615173	0.77748	0.971076	Atad1	ATPase family, AAA domain containing 1	19	10.4589	10.7307	10.5466	11.1627	10.6009	10.7801	10.7702	10.8282	10.5411	10.6468	10.6008
ENSMUSG00000013663	3197.33	-0.021966	0.0657172	0.145851	0.935103	Pten	phosphatase and tensin homolog	19	11.7747	11.8762	11.9854	12.1311	12.1229	12.3669	12.3855	12.5164	11.961	12.4121	11.9879
ENSMUSG00000013698	158.641	0.00910734	0.0628143	0.133974	0.935103	Pea15a	phosphoprotein enriched in astrocytes 15A	1	10.9305	10.2369	10.4804	10.4453	10.4375	10.2514	10.2947	10.0575	10.324	10.2171	10.5036
ENSMUSG00000013701	291.247	0.0155542	0.0645603	0.0400656	0.80739	Timm23	translocase of inner mitochondrial membrane 23	14	11.1832	10.6467	10.6187	10.6882	10.6386	10.4936	10.3686	10.1661	10.5983	10.5041	10.5967
ENSMUSG00000013707	263.208	-0.00509393	0.0614166	0.625864	0.944114	Tnfaip8l2	tumor necrosis factor, alpha-induced protein 8-like 2	3	10.5788	10.4066	10.4883	10.5997	10.5002	10.6248	10.3957	10.8057	10.5533	10.5566	10.5039
ENSMUSG00000013736	369.1	-0.00819317	0.062617	0.171424	0.935103	Trnt1	tRNA nucleotidyl transferase, CCA-adding, 1	6	10.1264	10.6703	10.7466	10.5774	10.5941	10.5846	11.3485	10.4485	10.8419	10.5942	10.6002
ENSMUSG00000013787	892.469	0.00199632	0.0607949	0.871341	0.986858	Ehmt2	euchromatic histone lysine N-methyltransferase 2	17	11.3241	11.1295	11.0972	11.1288	11.4983	11.0386	10.8642	11.4468	11.295	11.133	11.1472
ENSMUSG00000013822	144.333	0.00862285	0.06279	0.0964835	0.935103	Elof1	ELF1 homolog, elongation factor 1	9	10.5659	10.5319	10.3002	10.4235	10.3342	10.4112	10.2731	9.94349	10.4569	10.154	10.2201
ENSMUSG00000013833	235.707	-0.00134746	0.0618376	0.817608	0.976392	Med16	mediator complex subunit 16	10	10.1616	10.8249	10.2317	10.2954	10.5947	10.8188	10.4469	10.668	10.6827	10.5705	10.4835
ENSMUSG00000013846	519.75	-0.0171408	0.0636118	0.239104	0.935103	St3gal1	ST3 beta-galactoside alpha-2,3-sialyltransferase 1	15	10.7878	10.692	10.8268	10.5879	10.8211	10.9696	11.0282	10.7952	10.8015	10.8746	10.899
ENSMUSG00000013858	322.298	0.00012293	0.0607687	0.994575	0.999188	Tmem259	transmembrane protein 259	10	10.7016	10.5219	10.5324	10.7545	10.6864	10.7233	10.8526	10.5341	10.5367	10.6753	10.6592
ENSMUSG00000013878	109.227	-0.00388761	0.0622389	0.0940327	0.935103	Rnf170	ring finger protein 170	8	9.81823	10.122	10.2574	10.151	10.0916	10.0433	9.81823	10.9921	10.1044	10.4345	10.2313
ENSMUSG00000013921	12.2322	-0.000566665	0.0621197	0.551702	0.935103	Clip3	CAP-GLY domain containing linker protein 3	7	9.72581	9.77725	9.87727	9.87727	9.87727	9.87727	10.2802	9.72581	9.87727	9.87727	9.87727
ENSMUSG00000013928	6.66405	4.31692e-05	0.0620905	0.97708	0.999188	1700020L13Rik	RIKEN cDNA 1700020L13 gene	7	9.86479	9.86479	9.96093	9.73829	9.8114	9.94779	9.86479	9.86479	9.7999	9.99051	9.80473
ENSMUSG00000013936	1.11147	0.000736111	0.0621223	0.347431	0.935103	Myl2	myosin, light polypeptide 2, regulatory, cardiac, slow	5	9.8136	9.8136	9.78949	9.78949	9.95825	9.78949	9.8136	9.8136	9.78949	9.78949	9.78949
ENSMUSG00000013973	125.055	-0.00570385	0.0621397	0.388279	0.935103	Dedd	death effector domain-containing	1	10.6098	10.0167	10.2924	10.2506	10.2954	10.178	10.3037	10.3563	10.2762	10.4744	10.4844
ENSMUSG00000013997	132.22	0.00854644	0.0626559	0.181869	0.935103	Nit1	nitrilase 1	1	10.8465	10.207	10.2464	10.3689	10.2911	10.4537	10.2103	10.0686	10.2212	10.3853	10.3649
ENSMUSG00000014030	5145.31	-0.00314143	0.0570172	0.849727	0.981373	Pax5	paired box 5	4	12.5889	12.7897	12.7986	12.6604	12.9854	12.6604	12.9214	12.7354	12.6754	12.6939	12.8378
ENSMUSG00000014039	216.013	0.00681494	0.0624488	0.178349	0.935103	Prdm15	PR domain containing 15	16	10.6303	10.3024	10.4544	10.5364	10.3949	10.9482	10.0845	10.7897	10.1895	10.3962	10.2427
ENSMUSG00000014074	234.893	-0.00725919	0.0623606	0.270555	0.935103	Rnf168	ring finger protein 168	16	10.3095	10.3837	10.4957	10.6884	10.5708	10.2519	11.0672	10.2984	10.5114	10.6428	10.442
ENSMUSG00000014075	28.4236	-0.000288942	0.0620626	0.876991	0.98732	Dynlt2b	dynein light chain Tctex-type 2B	16	9.80708	10.1194	10.0226	9.84379	9.89939	10.2332	9.80708	10.2764	9.8934	10.0678	10.0572
ENSMUSG00000014077	330.384	-0.00504431	0.0613999	0.638376	0.946231	Chp1	calcineurin-like EF hand protein 1	2	10.487	10.69	10.8247	10.495	10.7087	10.5955	10.5263	10.9113	10.5804	10.6185	10.7529
ENSMUSG00000014177	158.855	-0.00145476	0.0620135	0.702203	0.960204	Tvp23b	trans-golgi network vesicle protein 23B	11	9.7022	10.5581	10.5345	10.3079	10.2934	10.2771	10.144	10.9614	10.2431	10.3063	10.4274
ENSMUSG00000014195	945.942	-0.0108404	0.0617795	0.441393	0.935103	Dnajc7	DnaJ heat shock protein family (Hsp40) member C7	11	11.1577	11.1668	10.8961	11.2652	11.3636	11.3402	11.5517	11.0943	11.3389	11.2432	11.2512
ENSMUSG00000014226	553.793	-0.00258959	0.0615049	0.770521	0.970606	Cacybp	calcyclin binding protein	1	10.9993	10.6049	10.8287	11.0268	10.7191	11.1722	10.8375	11.2057	10.6222	11.2005	10.8134
ENSMUSG00000014232	265.482	-0.00268974	0.0614563	0.768654	0.970184	Cluap1	clusterin associated protein 1	16	10.2942	10.6881	10.6144	10.6122	10.3826	10.6624	10.7924	10.4637	10.6107	10.5408	10.4941
ENSMUSG00000014243	27.4908	0.00636404	0.0625174	0.0458947	0.836636	Zswim7	zinc finger SWIM-type containing 7	11	10.1543	10.0019	9.96675	10.1892	9.99303	9.91852	9.89898	9.89898	9.99262	9.87008	9.98942
ENSMUSG00000014245	66.0326	0.00391148	0.0622574	0.123258	0.935103	Pigl	phosphatidylinositol glycan anchor biosynthesis, class L	11	10.6708	9.78576	9.92046	10.3693	10.0969	10.2639	10.1715	9.78576	10.0959	9.96695	10.0109
ENSMUSG00000014294	445.163	-7.11619e-05	0.0607122	0.992814	0.999188	Ndufa2	NADH:ubiquinone oxidoreductase subunit A2	18	10.8889	10.8244	10.799	10.8976	10.631	10.8591	10.6	10.9329	11.0071	10.7819	10.7052
ENSMUSG00000014301	61.6186	-0.00202734	0.0621105	0.37035	0.935103	Pam16	presequence translocase-asssociated motor 16 homolog (S. cerevisiae)	16	9.78205	10.068	10.2407	9.82103	10.2354	10.1135	9.99171	10.5945	10.2802	9.90406	10.1686
ENSMUSG00000014313	1610.12	-0.00665236	0.0606498	0.657632	0.950008	Cox6c	cytochrome c oxidase subunit 6C	15	11.8933	11.3278	11.6084	11.7162	11.6038	11.5558	12.0051	11.3445	11.7293	11.5904	11.6949
ENSMUSG00000014349	365.169	-0.00808353	0.0621302	0.390101	0.935103	Ube2z	ubiquitin-conjugating enzyme E2Z	11	10.5884	10.586	10.5803	10.5641	10.7405	10.6809	10.4085	11.031	10.7506	10.5513	10.7067
ENSMUSG00000014353	112.852	0.00251426	0.0620093	0.592918	0.93638	Tmem87b	transmembrane protein 87B	2	10.5397	10.3454	10.1184	10.2479	10.2802	10.3855	9.88282	10.3234	10.1027	10.4368	10.3385
ENSMUSG00000014355	1310.81	8.52284e-05	0.0615536	0.999396	0.999946	Anapc1	anaphase promoting complex subunit 1	2	12.2026	11.1715	11.5513	11.291	11.1968	11.2415	10.7254	11.5958	11.507	11.8703	11.3089
ENSMUSG00000014361	11.7507	0.00233365	0.0621725	0.0512566	0.852077	Mertk	MER proto-oncogene tyrosine kinase	2	9.82069	10.1454	10.1314	9.78239	10.0056	9.78239	9.82069	9.82069	9.86952	9.86542	9.87634
ENSMUSG00000014402	248.852	0.0252987	0.0681027	0.0752947	0.924167	Tsg101	tumor susceptibility gene 101	7	10.6665	10.6375	10.5896	10.6094	10.6331	10.6266	10.3876	10.5797	10.3618	10.5359	10.6184
ENSMUSG00000014418	448.442	-0.0169961	0.0651824	0.0209558	0.703567	Hps5	HPS5, biogenesis of lysosomal organelles complex 2 subunit 2	7	10.7238	10.1676	10.4558	10.773	10.4547	10.8688	10.8821	11.2394	11.1197	10.7024	10.8981
ENSMUSG00000014426	898.454	-0.00870184	0.062799	0.0645045	0.902221	Map3k4	mitogen-activated protein kinase kinase kinase 4	17	10.3286	10.632	10.9823	10.8384	11.0999	11.0699	10.4664	12.632	11.0567	10.9531	11.103
ENSMUSG00000014444	262.843	-0.000797696	0.0616194	0.914739	0.991262	Piezo1	piezo-type mechanosensitive ion channel component 1	8	10.2122	10.761	10.5543	10.5615	10.5319	10.5633	10.7688	10.4057	10.4012	10.4017	10.7445
ENSMUSG00000014453	2449.67	0.0101725	0.0582251	0.6517	0.948676	Blk	B lymphoid kinase	14	11.9364	11.8863	12.054	11.9473	11.9846	12.0775	11.9379	12.0773	11.7997	11.7843	12.0687
ENSMUSG00000014470	161.268	-0.0156959	0.0643986	0.0868518	0.935103	Rnf166	ring finger protein 166	8	10.1919	10.3345	10.3315	10.4875	10.2954	10.3847	10.3182	10.7642	10.4267	10.5043	10.3852
ENSMUSG00000014496	171.69	-0.00976853	0.0629224	0.122632	0.935103	Ankrd28	ankyrin repeat domain 28	14	10.157	10.3085	10.1725	10.5674	10.3867	10.2995	10.409	10.6608	10.7522	10.1339	10.3746
ENSMUSG00000014498	349.116	-0.00877413	0.0626555	0.185979	0.935103	Ankrd52	ankyrin repeat domain 52	10	10.1256	10.6896	10.5926	10.4679	10.588	10.8368	10.6161	11.1618	10.8894	10.6552	10.508
ENSMUSG00000014503	5.1221	-9.05955e-05	0.0621014	0.945791	0.995639	Pkd2l2	polycystic kidney disease 2-like 2	18	10.0202	9.75189	9.85119	9.85119	9.9243	9.85119	9.75189	9.969	9.85119	9.85119	9.93256
ENSMUSG00000014504	305.682	-0.0128545	0.0633506	0.152178	0.935103	Srp19	signal recognition particle 19	18	10.5084	10.2522	10.5817	10.6319	10.7493	10.6083	10.7937	10.9887	10.642	10.5056	10.7315
ENSMUSG00000014547	1013.85	-0.015484	0.0603616	0.465979	0.935103	Wdfy2	WD repeat and FYVE domain containing 2	14	11.1655	11.2212	11.207	11.1977	11.3871	11.148	11.3166	11.2769	11.2014	11.4056	11.1687
ENSMUSG00000014550	308.561	-0.0105726	0.0628997	0.201445	0.935103	Rbsn	rabenosyn, RAB effector	6	10.272	10.7646	10.646	10.3403	10.3635	10.3788	10.6755	10.4972	10.6262	10.8775	10.6338
ENSMUSG00000014551	274.733	0.0176322	0.0654326	0.0234035	0.723456	Mrps25	mitochondrial ribosomal protein S25	6	10.6973	10.7476	10.8667	10.8672	10.4184	10.235	10.4374	10.2434	10.5089	10.4582	10.3657
ENSMUSG00000014554	131.675	-0.00637173	0.0621436	0.394806	0.935103	Dguok	deoxyguanosine kinase	6	10.36	10.3545	10.2908	10.2096	10.4111	10.2386	10.584	10.05	10.4195	10.4695	10.3208
ENSMUSG00000014592	86.6239	0.00321897	0.0619282	0.620141	0.942458	Camta1	calmodulin binding transcription activator 1	4	10.1592	10.3561	10.138	10.4749	10.0917	10.0344	10.216	10.0755	10.2842	10.1018	10.2869
ENSMUSG00000014599	29.4985	-0.00343083	0.0622329	0.0218175	0.716797	Csf1	colony stimulating factor 1 (macrophage)	3	9.8024	9.8024	9.80068	9.88345	10.1376	9.80068	10.2665	10.1136	10.0892	10.2266	10.0353
ENSMUSG00000014601	302.789	0.00276602	0.0618772	0.6714	0.952872	Strip1	striatin interacting protein 1	3	10.1334	10.9363	10.6334	10.6289	10.4629	10.5632	10.6944	10.4327	10.4667	10.6353	10.4541
ENSMUSG00000014606	477.842	0.0116887	0.0630122	0.22921	0.935103	Slc25a11	solute carrier family 25 (mitochondrial carrier oxoglutarate carrier), member 11	11	10.8694	11.2793	10.7103	11.0129	10.8088	10.8367	10.3105	10.8718	10.726	10.8015	10.933
ENSMUSG00000014609	1.02967	-0.00080565	0.062121	0.422591	0.935103	Chrne	cholinergic receptor, nicotinic, epsilon polypeptide	11	9.81605	9.81605	9.78704	9.83483	9.78704	9.78704	9.81605	9.81605	9.78704	9.94231	9.78704
ENSMUSG00000014633	105.101	0.00731291	0.0626302	0.0534188	0.854262	Cmc2	COX assembly mitochondrial protein 2	8	10.4966	10.4074	10.3615	10.4384	10.2534	9.94638	10.0758	9.93335	10.3046	10.0787	10.215
ENSMUSG00000014668	276.434	-0.023526	0.0683667	0.00635096	0.456792	Chfr	checkpoint with forkhead and ring finger domains	5	10.2115	10.4772	10.3823	10.3915	10.5398	10.568	10.4846	11.087	10.8844	10.4711	10.7184
ENSMUSG00000014686	17.6036	-0.00270693	0.0621739	0.0784662	0.929589	Ceacam16	carcinoembryonic antigen-related cell adhesion molecule 16	7	9.82329	9.82329	9.77979	9.9767	10.0146	9.94468	10.1432	10.0203	10.0993	10.0729	9.77979
ENSMUSG00000014725	21.3812	2.56865e-06	0.0621009	0.963893	0.997929	Adam28	a disintegrin and metallopeptidase domain 28	14	9.8721	9.8721	9.87682	10.0715	10.0653	10.0845	10.192	9.8721	9.90515	9.73098	9.93016
ENSMUSG00000014748	277.404	-0.00256858	0.0617371	0.707287	0.962372	Tex261	testis expressed gene 261	6	10.3946	10.4141	10.7626	10.3468	10.4793	10.8167	10.9159	10.474	10.5292	10.4772	10.4357
ENSMUSG00000014763	504.142	-0.00769095	0.0613577	0.551979	0.935103	Fam120b	family with sequence similarity 120, member B	17	10.7391	10.9631	10.7062	10.8141	10.9118	10.7896	10.6046	11.0702	10.8503	10.8401	10.9977
ENSMUSG00000014767	292.148	0.0128385	0.0633466	0.176248	0.935103	Tbp	TATA box binding protein	17	10.8635	10.3769	10.7585	10.717	10.6106	10.5875	10.7052	10.4138	10.602	10.3487	10.5047
ENSMUSG00000014769	1215.79	-0.00514432	0.0573697	0.812235	0.975766	Psmb1	proteasome (prosome, macropain) subunit, beta type 1	17	11.3813	11.3978	11.2753	11.5325	11.4516	11.4931	11.5005	11.4486	11.4232	11.4822	11.3664
ENSMUSG00000014771	171.88	-0.00228556	0.0614072	0.811528	0.975766	Pdcd2	programmed cell death 2	17	10.6221	10.2477	10.3364	10.3942	10.4402	10.377	10.5295	10.2581	10.469	10.4669	10.4168
ENSMUSG00000014773	7.09966	-0.00114502	0.0621269	0.35791	0.935103	Dll1	delta like canonical Notch ligand 1	17	9.84947	9.84947	9.75361	9.88003	9.81331	9.75361	9.84947	9.84947	10.1445	9.75361	9.84756
ENSMUSG00000014778	235.882	-0.0189016	0.0658902	0.0229952	0.723456	Fhod1	formin homology 2 domain containing 1	8	10.4261	10.1222	10.4678	10.453	10.3697	10.5981	11.052	10.4856	10.4639	10.6046	10.6931
ENSMUSG00000014786	13.0383	0.000137349	0.0621135	0.74658	0.969254	Slc9a5	solute carrier family 9 (sodium/hydrogen exchanger), member 5	8	9.71604	9.71604	9.97126	9.88704	9.88704	9.93279	10.2274	9.96295	9.88704	9.88704	9.88704
ENSMUSG00000014791	42.026	0.00349789	0.0621887	0.262615	0.935103	Elmo3	engulfment and cell motility 3	8	9.89899	10.2028	10.1803	10.3062	9.90639	10.0205	9.89899	10.1344	9.81934	9.98524	10.0186
ENSMUSG00000014813	12.3653	0.00166629	0.0621084	0.478111	0.935103	Stc1	stanniocalcin 1	14	9.82157	10.0982	9.9006	9.78151	9.92769	10.117	9.96486	9.82157	9.91218	9.84022	10.0066
ENSMUSG00000014837	16.8065	0.00619096	0.062373	0.226614	0.935103	4931428F04Rik	RIKEN cDNA 4931428F04 gene	8	9.98788	9.95639	9.89995	10.0387	9.92129	9.96456	9.90495	9.90495	9.9481	9.90554	9.8917
ENSMUSG00000014850	253.933	-0.0025961	0.0617312	0.725847	0.965982	Msh3	mutS homolog 3	13	10.9186	10.1557	10.4783	10.4798	10.5183	10.4925	10.7011	10.3748	10.5565	10.7328	10.5045
ENSMUSG00000014852	1.82425	0.000443999	0.0621086	0.648906	0.948441	Adamts13	a disintegrin-like and metallopeptidase (reprolysin type) with thrombospondin type 1 motif, 13	2	9.80915	9.93512	9.79393	9.79393	9.83615	9.91496	9.80915	9.80915	9.79393	9.85264	9.89897
ENSMUSG00000014856	49.6628	0.0102709	0.0628764	0.195579	0.935103	Tmem208	transmembrane protein 208	8	10.2162	10.1139	10.2511	10.0045	10.1329	10.1837	10.0324	10.1254	10.0671	10.1074	10.1071
ENSMUSG00000014859	625.905	-0.0149677	0.0621734	0.386928	0.935103	E2f4	E2F transcription factor 4	8	11.1456	10.8201	10.9982	10.8743	11.0678	10.8781	10.9205	11.1028	11.1345	10.9859	11.0419
ENSMUSG00000014867	614.391	0.0165494	0.0642221	0.156063	0.935103	Surf4	surfeit gene 4	2	10.803	11.3121	10.9156	10.9968	10.8229	11.0816	10.6702	10.8837	11.0646	10.74	10.7994
ENSMUSG00000014873	170.829	-0.0105207	0.0630155	0.141257	0.935103	Surf2	surfeit gene 2	2	10.1959	10.4115	10.296	10.6434	10.1533	10.142	10.6086	10.3431	10.6016	10.3957	10.4965
ENSMUSG00000014905	365.895	0.000740851	0.061708	0.928957	0.993631	Dnajb9	DnaJ heat shock protein family (Hsp40) member B9	12	10.6183	10.6641	10.7228	10.5688	10.7554	10.6442	10.2135	11.0243	10.5997	10.5372	10.5823
ENSMUSG00000014907	92.4954	-0.0101215	0.0630729	0.0879502	0.935103	Naf1	nuclear assembly factor 1 ribonucleoprotein	8	10.277	10.1203	9.99089	10.2254	10.2505	10.1367	10.3578	10.1888	10.0536	10.5654	10.4294
ENSMUSG00000014956	1422.1	-0.0136221	0.0626929	0.318568	0.935103	Ppp1cb	protein phosphatase 1 catalytic subunit beta	5	10.9692	11.7353	11.3674	11.3808	11.6091	11.4307	11.6836	11.5803	11.6542	11.4364	11.5662
ENSMUSG00000014959	441.627	-3.21395e-05	0.0612376	0.897237	0.989676	Gorasp2	golgi reassembly stacking protein 2	2	11.0287	10.6109	10.8524	10.6027	10.8601	10.714	10.7134	10.7234	11.1061	10.5463	10.702
ENSMUSG00000014980	88.1677	-0.00488781	0.0620784	0.446439	0.935103	Tsen15	tRNA splicing endonuclease subunit 15	1	10.1276	10.3082	10.1305	10.3592	10.1663	10.1809	10.5107	9.99861	10.3234	10.3308	10.1628
ENSMUSG00000015002	826.285	0.0072887	0.0612734	0.57767	0.935103	Efr3a	EFR3 homolog A	15	11.515	11.1168	10.9583	11.186	11.1093	11.0657	10.8788	11.0042	11.2966	11.1815	11.1034
ENSMUSG00000015013	66.6604	1.4043	0.615368	0.00047515	0.086463	Trappc2l	trafficking protein particle complex 2-like	8	10.3383	10.2048	10.2436	10.3834	10.3507	10.0932	10.0012	10.1481	10.0377	10.0062	10.0969
ENSMUSG00000015016	122.89	-0.0032635	0.0620816	0.456278	0.935103	Acsf3	acyl-CoA synthetase family member 3	8	9.89926	10.4523	10.0477	10.3571	10.251	10.1943	10.5783	10.1226	10.3139	10.4497	10.2283
ENSMUSG00000015023	799.354	0.0138754	0.0621064	0.38593	0.935103	Ddx19a	DEAD box helicase 19a	8	11.4158	10.9591	11.0251	11.1765	11.1238	11.1983	10.9626	11.1181	10.9777	11.1138	11.1821
ENSMUSG00000015027	168.297	-0.00803261	0.0622972	0.338329	0.935103	Galns	galactosamine (N-acetyl)-6-sulfate sulfatase	8	10.2453	10.3418	10.1777	10.3336	10.3003	10.4235	10.2438	10.493	10.5024	10.1386	10.4408
ENSMUSG00000015053	3.70348	-0.00138666	0.0621388	0.108931	0.935103	Gata2	GATA binding protein 2	6	9.77611	9.77611	9.82697	9.82697	9.82697	9.82697	9.77611	10.0546	9.82697	9.95822	9.82697
ENSMUSG00000015087	280.863	0.0121093	0.062724	0.296681	0.935103	Rabl6	RAB, member RAS oncogene family-like 6	2	10.8186	10.4311	10.6708	10.6617	10.6657	10.5846	10.5108	10.6343	10.4681	10.708	10.4322
ENSMUSG00000015092	757.569	0.00581645	0.0610943	0.650606	0.948676	Edf1	endothelial differentiation-related factor 1	2	11.2431	11.125	11.1236	11.0445	10.9732	11.259	11.3324	10.6806	11.1355	11.0274	11.1037
ENSMUSG00000015095	226.7	0.0095073	0.0627798	0.180522	0.935103	Fbxw5	F-box and WD-40 domain protein 5	2	10.8276	10.5228	10.5602	10.5899	10.4176	10.3929	10.4761	10.091	10.4326	10.5021	10.4602
ENSMUSG00000015112	21.1293	-0.00322286	0.0622113	0.0659958	0.907044	Slc25a13	solute carrier family 25 (mitochondrial carrier, adenine nucleotide translocator), member 13	6	9.87006	9.87006	9.73302	9.73302	10.1025	9.79772	9.9784	10.0448	10.0116	10.1468	10.0612
ENSMUSG00000015120	919.182	0.0044001	0.0602504	0.777932	0.971116	Ube2i	ubiquitin-conjugating enzyme E2I	17	11.4889	11.1057	11.1011	11.4419	11.128	11.1098	11.1428	11.1361	11.2374	11.3274	11.1831
ENSMUSG00000015126	74.6185	-0.00503935	0.0621621	0.355295	0.935103	Tsr3	TSR3 20S rRNA accumulation	17	9.9487	10.2432	10.2534	9.98818	10.2196	10.2537	10.4622	10.1344	10.2392	10.1798	10.246
ENSMUSG00000015127	244.457	0.00150141	0.062063	0.575417	0.935103	Unkl	unkempt family like zinc finger	17	9.80123	10.6089	10.8119	10.9216	10.3738	10.2461	10.2866	11.0996	10.3219	10.2177	10.2507
ENSMUSG00000015133	476.904	-0.0190411	0.0652952	0.109697	0.935103	Lrrk1	leucine-rich repeat kinase 1	7	10.9021	10.6887	10.8332	10.7132	10.6723	10.8089	10.8222	10.9446	10.7903	11.3134	10.7445
ENSMUSG00000015143	48.5304	-0.0028701	0.0621326	0.295951	0.935103	Actn1	actinin, alpha 1	12	9.97068	9.97068	9.97118	9.91067	9.85951	10.2867	10.1239	9.97068	10.2544	9.80349	9.97684
ENSMUSG00000015149	259.95	-0.0106892	0.0630741	0.1361	0.935103	Sirt2	sirtuin 2	7	10.368	10.4798	10.337	10.1935	10.7469	10.648	10.8808	10.5212	10.8503	10.5084	10.653
ENSMUSG00000015165	1533.88	-0.00154989	0.059385	0.941889	0.995639	Hnrnpl	heterogeneous nuclear ribonucleoprotein L	7	11.6758	11.4248	11.2446	11.4879	11.4452	11.5242	11.2844	11.5254	11.4406	11.5974	11.6032
ENSMUSG00000015176	467.109	-0.0166183	0.0643663	0.139355	0.935103	Nolc1	nucleolar and coiled-body phosphoprotein 1	19	10.6089	10.8947	10.9601	10.5564	10.8831	10.6235	11.1332	10.7021	10.9063	11.0015	10.9123
ENSMUSG00000015189	287.742	-7.74926e-05	0.0616835	0.979137	0.999188	Casd1	CAS1 domain containing 1	6	10.3295	10.7692	10.8725	10.6156	10.5052	10.322	10.3371	10.85	10.5955	10.734	10.3553
ENSMUSG00000015202	76.4164	0.0100419	0.0632504	0.0019506	0.238222	Cnksr3	Cnksr family member 3	10	10.5832	10.2477	10.269	10.2636	10.2145	10.2093	9.9555	9.84716	9.96011	10.0149	10.1773
ENSMUSG00000015214	390.633	0.010991	0.062623	0.300713	0.935103	Mtmr1	myotubularin related protein 1	X	10.772	10.8546	10.6537	11.0155	10.5398	10.6486	10.6958	10.474	10.7526	10.8137	10.4698
ENSMUSG00000015217	41.9407	0.00484312	0.0623349	0.0925866	0.935103	Hmgb3	high mobility group box 3	X	10.1053	10.2504	10.0932	10.4044	9.92842	9.94818	9.98672	9.84343	10.1894	9.93569	9.82609
ENSMUSG00000015222	1.21947	-0.00100419	0.0621231	0.33511	0.935103	Map2	microtubule-associated protein 2	1	9.79053	9.86327	9.81255	9.81255	9.81255	9.81255	9.79053	9.8818	9.81255	9.81255	9.9454
ENSMUSG00000015224	1.42469	0.000744862	0.0621225	0.3055	0.935103	Cyp2j9	cytochrome P450, family 2, subfamily j, polypeptide 9	4	9.81519	9.81519	9.78789	9.97894	9.78789	9.78789	9.81519	9.81519	9.78789	9.78789	9.78789
ENSMUSG00000015243	2681.68	0.0152036	0.0632049	0.272693	0.935103	Abca1	ATP-binding cassette, sub-family A (ABC1), member 1	4	12.6583	11.8178	12.4604	11.7982	12.0844	11.9656	11.7855	11.9677	12.0347	12.0455	12.0123
ENSMUSG00000015247	143.48	0.00432578	0.0621057	0.428773	0.935103	Nipsnap3b	nipsnap homolog 3B	4	10.6245	10.3019	10.0831	10.5108	10.3623	10.4838	10.4768	9.95722	10.1858	10.461	10.294
ENSMUSG00000015289	23.9888	-0.00142086	0.0619614	0.731111	0.966853	Lage3	L antigen family, member 3	X	9.89657	9.96931	10.0238	10.0633	10.0435	9.91602	10.0177	10.0546	9.92846	10.0166	9.90009
ENSMUSG00000015290	82.929	-0.000255937	0.0618058	0.962158	0.997929	Ubl4a	ubiquitin-like 4A	X	10.3706	10.0609	10.4002	10.1739	10.1857	10.1464	10.4353	10.032	10.1248	10.2966	10.2449
ENSMUSG00000015291	304.333	0.00336974	0.061569	0.710589	0.963116	Gdi1	guanosine diphosphate (GDP) dissociation inhibitor 1	X	10.4891	10.6406	10.5914	11.0114	10.6414	10.4978	10.7103	10.7088	10.4099	10.6394	10.6689
ENSMUSG00000015305	21.5689	0.00318901	0.0622197	0.0991858	0.935103	Sash1	SAM and SH3 domain containing 1	10	9.96122	9.90259	10.2635	9.92948	9.95347	9.9508	9.90259	9.90259	9.92244	9.7005	9.7005
ENSMUSG00000015312	180.065	-0.0089566	0.0626152	0.234246	0.935103	Gadd45b	growth arrest and DNA-damage-inducible 45 beta	10	10.4852	10.2785	10.381	10.3625	10.4182	10.4289	10.8645	10.1073	10.5092	10.6267	10.3106
ENSMUSG00000015314	752.83	-0.00734808	0.0606342	0.636565	0.945983	Slamf6	SLAM family member 6	1	11.0386	11.0461	10.8091	11.1735	11.2637	10.9534	11.0239	11.1777	11.1939	11.0265	11.0809
ENSMUSG00000015316	90.42	0.0031271	0.0619596	0.610666	0.939563	Slamf1	signaling lymphocytic activation molecule family member 1	1	10.0222	10.5283	10.2519	10.3834	10.2411	10.0586	10.3199	10.0661	10.1813	10.3143	10.2083
ENSMUSG00000015335	41.0735	-0.00523387	0.0623598	0.119258	0.935103	Zdhhc12	zinc finger, DHHC domain containing 12	2	9.87435	10.1261	9.88624	9.91977	10.0177	10.0212	9.87435	10.3042	10.1361	10.2654	10.0668
ENSMUSG00000015337	78.2897	0.00437457	0.0622989	0.105426	0.935103	Endog	endonuclease G	2	10.5539	10.163	9.9717	10.4522	10.3552	10.2381	10.1167	9.88924	10.0153	9.9717	10.2608
ENSMUSG00000015340	7011.6	0.0178021	0.0605894	0.430466	0.935103	Cybb	cytochrome b-245, beta polypeptide	X	13.3272	13.2474	13.2967	12.9342	12.9959	13.1159	13.0138	12.8445	13.0648	13.1523	13.1978
ENSMUSG00000015341	485.849	-0.00544629	0.0615545	0.573142	0.935103	Golga7	golgi autoantigen, golgin subfamily a, 7	8	10.4975	10.852	11.0681	10.7401	10.6092	10.8775	11.0736	10.8046	10.7665	10.8543	10.7328
ENSMUSG00000015342	59.6038	-0.000893249	0.061987	0.820171	0.976392	Xk	X-linked Kx blood group	X	10.0726	10.3307	10.134	9.94882	10.0199	10.1353	10.1889	9.87822	10.0986	10.3589	10.1277
ENSMUSG00000015354	2.43662	-0.000540256	0.0621122	0.677443	0.953618	Pcolce2	procollagen C-endopeptidase enhancer 2	9	9.83635	9.83635	9.76673	9.76673	9.76673	9.89611	9.83635	9.83635	9.84219	9.91636	9.89958
ENSMUSG00000015355	647.999	0.000560519	0.0604983	0.973652	0.998814	Cd48	CD48 antigen	1	11.1283	10.7586	11.1316	11.1006	11.0039	10.9261	11.0588	11.0928	10.9394	10.8045	11.1614
ENSMUSG00000015357	199.747	0.00650723	0.0621861	0.373918	0.935103	Clpx	caseinolytic mitochondrial matrix peptidase chaperone subunit	9	10.73	10.4833	10.3503	10.4781	10.3654	10.6153	10.3488	10.2426	10.7302	10.4204	10.1986
ENSMUSG00000015363	363.654	0.00145951	0.0617406	0.831918	0.977617	Trabd	TraB domain containing	15	11.1811	10.4984	10.794	10.3771	10.5622	10.6901	10.2518	10.7483	10.8193	10.6068	10.84
ENSMUSG00000015377	29.199	-0.000268535	0.0619617	0.951067	0.996267	Dennd6b	DENN/MADD domain containing 6B	15	10.0634	9.91979	10.0061	9.90725	9.99858	10.0595	10.0631	9.91979	9.92166	10.1249	9.92259
ENSMUSG00000015396	670.636	-0.0135365	0.062532	0.338716	0.935103	Cd83	CD83 antigen	13	10.9783	10.9558	10.8774	10.8486	11.3002	10.7864	11.0844	11.0177	11.0539	11.0045	11.1922
ENSMUSG00000015461	532.6	-0.0172018	0.0649256	0.0675877	0.911911	Atf6b	activating transcription factor 6 beta	17	10.4121	10.8049	10.6883	11.0327	10.6849	10.8102	11.2846	10.9068	10.8065	11.1689	10.7732
ENSMUSG00000015468	2.30255	-0.000548535	0.0621129	0.666319	0.951577	Notch4	notch 4	17	9.83433	9.83433	9.76875	9.76875	9.87214	9.83346	9.83433	9.83433	9.884	9.76875	9.94444
ENSMUSG00000015474	24.5862	-0.001426	0.0621156	0.217094	0.935103	Ppt2	palmitoyl-protein thioesterase 2	17	9.8214	9.8214	9.78168	9.9843	9.96558	10.0846	9.8214	10.3926	10.0568	9.87451	10.0018
ENSMUSG00000015478	55.3517	0.00182949	0.0618764	0.758788	0.969546	Rnf5	ring finger protein 5	17	9.89186	10.3369	10.1898	10.1108	10.2386	10.121	10.1566	10.2139	10.0931	10.1895	10.106
ENSMUSG00000015488	212.512	-0.0100136	0.0630668	0.0510311	0.851639	Cacfd1	calcium channel flower domain containing 1	2	10.0393	10.1083	10.3134	10.4849	10.4564	10.5169	10.417	11.2233	10.4104	10.4413	10.5056
ENSMUSG00000015501	1376.35	-0.0142825	0.0632572	0.23118	0.935103	Hivep2	human immunodeficiency virus type I enhancer binding protein 2	10	10.9598	11.4373	11.4841	11.3468	11.6695	11.5499	11.9346	11.6753	11.3735	11.7541	11.3342
ENSMUSG00000015522	597.308	0.031099	0.0719453	0.0428813	0.82554	Arnt	aryl hydrocarbon receptor nuclear translocator	3	11.2722	10.8458	10.966	11.1142	10.8015	11.0739	10.7713	10.8267	10.8613	10.7622	10.9239
ENSMUSG00000015533	2.35404	0.000858063	0.0621203	0.311966	0.935103	Itga2	integrin alpha 2	13	9.77997	9.93423	9.98062	9.82311	9.82311	9.82311	9.8883	9.77997	9.82311	9.82311	9.82311
ENSMUSG00000015536	108.224	-0.00503473	0.0621634	0.358287	0.935103	Mocs2	molybdenum cofactor synthesis 2	13	10.309	10.046	10.0817	10.2502	10.4768	10.2114	10.126	10.6126	10.488	10.168	10.2378
ENSMUSG00000015542	51.8208	-0.00466452	0.0622364	0.18252	0.935103	Nat9	N-acetyltransferase 9 (GCN5-related, putative)	11	9.99242	9.95043	10.0932	10.2338	10.0839	10.0864	10.1372	10.3278	9.96368	10.2908	9.9619
ENSMUSG00000015568	7.20265	0.000779236	0.0621059	0.520077	0.935103	Lpl	lipoprotein lipase	8	9.8151	10.0964	9.96153	9.78798	9.90735	9.89027	9.8151	9.8151	9.86343	9.99949	9.78798
ENSMUSG00000015575	462.887	0.0128118	0.0627524	0.304071	0.935103	Atp6v0e	ATPase, H+ transporting, lysosomal V0 subunit E	17	10.7304	11.0948	10.8196	10.9218	10.7848	10.796	10.7307	10.6784	10.5329	10.8876	10.9173
ENSMUSG00000015597	801.957	-0.00426906	0.0615218	0.667124	0.951962	Zfp318	zinc finger protein 318	17	11.5035	10.9886	11.3895	11.0279	10.8777	10.847	11.218	10.8139	11.3931	11.3214	11.0604
ENSMUSG00000015599	34.1423	0.000676953	0.0620506	0.817423	0.976392	Ttbk1	tau tubulin kinase 1	17	9.95442	10.398	9.99625	10.0744	10.0427	10.0026	10.091	9.67977	10.0975	9.92331	10.0791
ENSMUSG00000015605	307.182	0.00845325	0.0617607	0.478314	0.935103	Srf	serum response factor	17	10.6693	10.6756	10.5839	10.479	10.687	10.6223	10.3784	10.6431	10.4898	10.7506	10.5284
ENSMUSG00000015653	3.73105	-0.000106355	0.0621136	0.69871	0.959419	Steap2	six transmembrane epithelial antigen of prostate 2	5	9.76632	9.76632	9.83677	9.83677	9.87898	9.83677	10.0722	9.76632	9.83677	9.83677	9.83677
ENSMUSG00000015656	16636.3	0.00738907	0.057466	0.748688	0.969261	Hspa8	heat shock protein 8	9	14.3998	14.0529	14.1019	14.1325	14.4118	13.9113	14.0807	14.0837	14.2293	14.1823	14.1105
ENSMUSG00000015659	45.9364	-0.00117405	0.0621019	0.461699	0.935103	Serac1	serine active site containing 1	17	9.70384	10.5785	9.89924	9.89924	10.0627	10.0365	10.0371	9.87041	10.2576	10.043	10.1339
ENSMUSG00000015668	91.9326	0.000398217	0.0620008	0.920597	0.992456	Pdzd11	PDZ domain containing 11	X	10.5598	10.1687	10.0006	9.9888	10.4671	10.2507	9.89171	10.3086	10.3343	10.2483	10.3357
ENSMUSG00000015671	606.318	-0.0228106	0.0663298	0.132536	0.935103	Psma2	proteasome subunit alpha 2	13	11.0155	10.8388	10.9604	10.7951	11.0077	10.9295	11.1417	10.9423	11.2988	10.8949	11.0057
ENSMUSG00000015672	196.02	-0.026172	0.069648	0.0161417	0.645541	Mrpl32	mitochondrial ribosomal protein L32	13	10.2746	10.5349	10.291	10.4299	10.4528	10.3796	10.3371	10.7604	10.5691	10.5431	10.6719
ENSMUSG00000015697	302.632	-0.00169276	0.0613881	0.857952	0.984062	Setdb1	SET domain, bifurcated 1	3	10.7905	10.5993	10.6176	10.5181	10.5091	10.672	10.7899	10.2895	10.5643	10.836	10.6039
ENSMUSG00000015702	17.2839	0.000738137	0.0620593	0.793082	0.973783	Anxa9	annexin A9	3	9.90335	9.99244	9.92237	9.69973	10.0393	9.90419	9.90335	9.90335	9.92167	10.0311	9.96097
ENSMUSG00000015709	1.55725	0.000471912	0.0621186	0.549249	0.935103	Arnt2	aryl hydrocarbon receptor nuclear translocator 2	7	9.92149	9.89238	9.83667	9.83667	9.83667	9.83667	9.76641	9.76641	9.83667	9.83667	9.83667
ENSMUSG00000015711	77.2169	-0.00844127	0.0617556	0.474583	0.935103	Prune1	prune exopolyphosphatase	3	10.186	10.1637	10.2332	10.1639	10.2399	10.2053	10.1811	10.3158	10.2568	10.1777	10.2047
ENSMUSG00000015714	484.051	0.00726078	0.0621987	0.372359	0.935103	Cers2	ceramide synthase 2	3	11.2018	10.8737	10.5946	11.1483	10.5675	10.9059	10.7134	10.4861	10.5781	11.0826	10.8543
ENSMUSG00000015733	1288.97	-0.0127585	0.0624242	0.345095	0.935103	Capza2	capping protein (actin filament) muscle Z-line, alpha 2	6	11.3601	11.4476	11.3318	11.5725	11.3217	11.3172	11.0576	11.8999	11.605	11.4026	11.5379
ENSMUSG00000015745	495.837	-0.00815984	0.0620112	0.431848	0.935103	Plekho1	pleckstrin homology domain containing, family O member 1	3	10.7001	10.967	10.6284	10.897	10.845	10.7753	10.553	11.1315	11.0391	11.0405	10.6402
ENSMUSG00000015747	146.402	-0.00119477	0.0619986	0.684625	0.955817	Vps45	vacuolar protein sorting 45	3	10.4056	10.1296	10.7815	9.95637	10.2025	10.0484	10.466	10.1068	9.96364	10.8794	10.1071
ENSMUSG00000015748	280.112	-0.00701078	0.0619957	0.442786	0.935103	Prpf3	pre-mRNA processing factor 3	3	10.2217	10.7867	10.4343	10.6074	10.6345	10.6295	10.8713	10.5158	10.5479	10.6157	10.7228
ENSMUSG00000015749	700.274	-0.0114523	0.0623173	0.357342	0.935103	Anp32e	acidic (leucine-rich) nuclear phosphoprotein 32 family, member E	3	11.0713	10.924	10.7583	10.8635	11.2295	11.0353	10.8518	11.2729	11.3009	11.0309	10.9916
ENSMUSG00000015750	365.706	0.00171621	0.0618636	0.784316	0.97236	Aph1a	aph1 homolog A, gamma secretase subunit	3	11.3284	10.4461	10.3756	10.6122	10.8576	10.6426	10.6426	10.2656	10.476	10.6063	11.124
ENSMUSG00000015755	978.108	6.60843e-05	0.0604267	0.996323	0.999188	Tab2	TGF-beta activated kinase 1/MAP3K7 binding protein 2	10	11.3016	11.3795	11.0086	11.2955	10.9581	11.4013	11.2376	10.9959	11.34	11.3484	11.2487
ENSMUSG00000015757	544.976	0.00528598	0.0612324	0.656961	0.949796	Ppil4	peptidylprolyl isomerase (cyclophilin)-like 4	10	10.7247	10.982	10.8326	10.9849	10.9788	10.9858	10.6586	11.187	10.8995	10.8138	10.7211
ENSMUSG00000015759	268.247	0.0139727	0.0638031	0.109161	0.935103	Cnih1	cornichon family AMPA receptor auxiliary protein 1	14	10.8381	10.6999	10.4858	10.506	10.5411	10.5887	10.2709	10.3594	10.6424	10.5041	10.5263
ENSMUSG00000015776	118.827	0.00168027	0.061871	0.779296	0.97169	Med22	mediator complex subunit 22	2	10.2983	10.5042	10.2991	10.4205	10.2116	10.2103	9.92878	10.4607	10.3133	10.2902	10.341
ENSMUSG00000015790	168.172	0.00132636	0.0616653	0.863804	0.986289	Surf1	surfeit gene 1	2	10.623	10.0724	10.3747	10.3968	10.548	10.4592	10.3194	10.651	10.4162	10.3328	10.3878
ENSMUSG00000015804	451.051	0.00967035	0.0619924	0.431352	0.935103	Med28	mediator complex subunit 28	5	11.0322	10.6221	10.9375	10.7296	10.8137	10.9125	10.9808	10.5877	10.6434	10.8272	10.776
ENSMUSG00000015806	269.232	0.0213208	0.0666327	0.0544347	0.859079	Qdpr	quinoid dihydropteridine reductase	5	10.8532	10.4709	10.6371	10.857	10.4746	10.5659	10.4441	10.5155	10.5393	10.3862	10.5365
ENSMUSG00000015812	1.18415	-0.001291	0.0621342	0.270306	0.935103	Gnrh1	gonadotropin releasing hormone 1	14	9.78832	9.78832	9.81476	9.81476	9.81476	9.81476	9.9415	9.78832	9.81476	9.89778	9.81476
ENSMUSG00000015829	2.63176	-0.000557582	0.0621197	0.547572	0.935103	Tnr	tenascin R	1	9.7691	9.7691	9.83398	9.83398	9.83398	9.83398	10.0286	9.7691	9.83398	9.83398	9.83398
ENSMUSG00000015837	1113.04	-0.0106697	0.0619141	0.40845	0.935103	Sqstm1	sequestosome 1	11	10.9025	11.2906	11.3966	11.3085	11.2933	11.5363	11.5928	11.5985	11.2908	11.2011	11.3961
ENSMUSG00000015839	409.033	0.027507	0.0697708	0.0450869	0.836337	Nfe2l2	nuclear factor, erythroid derived 2, like 2	2	11.0474	10.8261	10.7247	10.7757	10.7234	10.834	10.6207	10.4691	10.8109	10.6603	10.6568
ENSMUSG00000015846	15.0382	0.00191469	0.0621444	0.153545	0.935103	Rxra	retinoid X receptor alpha	2	9.84189	10.1625	10.0555	10.0916	9.89464	9.76119	9.84189	9.84189	9.92984	9.76119	9.96037
ENSMUSG00000015850	10.2419	0.000133901	0.0621125	0.901548	0.990655	Adamtsl4	ADAMTS-like 4	3	9.72895	9.86501	9.87413	9.87413	9.94725	9.87413	9.72895	10.2154	9.87413	9.87413	9.87413
ENSMUSG00000015854	54.8596	0.00290961	0.0620312	0.527435	0.935103	Cd5l	CD5 antigen-like	3	10.0509	10.1377	10.0815	9.93779	9.97545	10.0907	9.99226	9.99226	10.2328	9.99912	9.98563
ENSMUSG00000015869	312.925	0.0164915	0.0647316	0.071677	0.921091	Prpsap1	phosphoribosyl pyrophosphate synthetase-associated protein 1	11	10.8916	10.5005	10.8851	10.6913	10.2809	10.7624	10.5301	10.4361	10.4021	10.5775	10.5278
ENSMUSG00000015880	36.8245	-0.00329233	0.0622051	0.0978682	0.935103	Ncapg	non-SMC condensin I complex, subunit G	5	9.8504	9.95327	10.0015	9.75268	10.0091	10.0912	10.4226	9.8504	10.146	10.0149	10.1187
ENSMUSG00000015882	445.105	-0.00629341	0.062409	0.132989	0.935103	Lcorl	ligand dependent nuclear receptor corepressor-like	5	10.4439	10.4252	10.6087	10.7029	10.7893	10.4319	10.247	11.4638	10.7994	10.6706	10.5123
ENSMUSG00000015889	478.659	0.00160318	0.0604316	0.907373	0.990768	Lta4h	leukotriene A4 hydrolase	10	10.7614	10.9664	10.6823	10.8672	11.0397	10.7135	10.741	10.8768	10.9475	10.8153	10.7894
ENSMUSG00000015932	135.09	0.00226954	0.0620185	0.611393	0.939563	Dstn	destrin	2	9.92646	10.6741	10.2768	10.2386	10.2853	10.3447	10.143	10.381	10.2476	10.4147	10.1604
ENSMUSG00000015937	1228.38	0.0103684	0.0606741	0.516257	0.935103	Macroh2a1	macroH2A.1 histone	13	11.3027	11.6588	11.4782	11.4932	11.3701	11.3395	11.1363	11.5367	11.469	11.3608	11.3497
ENSMUSG00000015942	135.575	-0.00472951	0.0620963	0.408535	0.935103	Gtf2ird2	GTF2I repeat domain containing 2	5	9.91634	10.543	10.227	10.4744	10.2628	10.2049	10.4453	10.4421	10.4673	10.4277	10.2925
ENSMUSG00000015943	63.8597	0.00301109	0.0614569	0.756635	0.969546	Bola1	bolA-like 1 (E. coli)	3	10.1032	10.2482	10.1793	10.1616	10.2698	10.1161	10.1789	10.1653	10.1249	10.1186	10.2469
ENSMUSG00000015944	60.4638	-0.00116577	0.0620157	0.739492	0.968165	Castor2	cytosolic arginine sensor for mTORC1 subunit 2	5	9.97204	10.239	9.99482	9.97158	10.0191	9.95392	10.1047	9.97204	10.1822	10.2716	10.1103
ENSMUSG00000015947	1.39647	-0.00022988	0.0621081	0.865379	0.986762	Fcgr1	Fc receptor, IgG, high affinity I	3	9.82803	9.82803	9.85927	9.77505	9.77505	9.86655	9.82803	9.82803	9.89825	9.84696	9.77505
ENSMUSG00000015950	1865.63	-0.00135617	0.0586236	0.942668	0.995639	Ncf1	neutrophil cytosolic factor 1	5	11.9499	11.6648	11.611	11.764	11.7839	11.6697	11.8146	11.5405	11.9133	11.79	11.6652
ENSMUSG00000015961	724.722	0.00931429	0.06092	0.53137	0.935103	Adss	adenylosuccinate synthetase, non muscle	1	10.9468	11.2593	11.208	11.1972	11.0372	10.9014	11.0859	10.9782	11.0378	11.1564	10.9349
ENSMUSG00000015968	32.1523	-0.0020713	0.0621423	0.150609	0.935103	Cacna1d	calcium channel, voltage-dependent, L type, alpha 1D subunit	14	9.91785	9.85922	9.74387	9.79166	10.1319	10.0536	9.85922	10.2119	10.4004	9.80258	9.8103
ENSMUSG00000015971	287.671	0.00311342	0.0616106	0.724483	0.965664	Actr8	ARP8 actin-related protein 8	14	10.7946	10.3469	10.8922	10.5528	10.6499	10.4938	10.737	10.5656	10.6986	10.6254	10.3642
ENSMUSG00000015994	293.858	0.0156932	0.0642289	0.125794	0.935103	Fnta	farnesyltransferase, CAAX box, alpha	8	11.031	10.5009	10.8536	10.4968	10.6621	10.6083	10.4333	10.5375	10.6515	10.5064	10.6011
ENSMUSG00000016018	744.752	-0.00701542	0.0622336	0.329526	0.935103	Mtrex	Mtr4 exosome RNA helicase	13	10.6225	10.9575	10.9291	11.2835	10.9221	11.0384	10.6605	11.8622	11.2165	10.8017	10.9883
ENSMUSG00000016028	34.8226	-0.00441651	0.0623298	0.0292859	0.759662	Celsr1	cadherin, EGF LAG seven-pass G-type receptor 1	15	9.99085	9.71621	9.88687	9.93467	9.97129	9.96612	9.71621	10.5287	10.0101	10.2131	9.93385
ENSMUSG00000016087	1034.42	-0.0034695	0.0612541	0.751589	0.969546	Fli1	Friend leukemia integration 1	9	11.2646	11.3836	10.963	11.0347	11.2888	11.458	11.5662	10.7817	11.2195	11.4172	11.3619
ENSMUSG00000016128	0.772004	0.000118549	0.0621084	0.929948	0.993831	Stard13	StAR-related lipid transfer (START) domain containing 13	5	9.81814	9.81814	9.78494	9.78494	9.78494	9.897	9.81814	9.81814	9.84655	9.84365	9.78494
ENSMUSG00000016181	219.975	-0.00514192	0.0622341	0.30484	0.935103	Utp25	UTP25 small subunit processome component	1	10.2137	10.623	10.3608	10.061	10.562	10.4026	10.0977	10.7693	10.1997	11.0875	10.3078
ENSMUSG00000016194	32.0785	0.00213764	0.0621129	0.36378	0.935103	Hsd11b1	hydroxysteroid 11-beta dehydrogenase 1	1	9.92719	10.157	9.83339	10.0829	9.93578	10.0576	9.92719	9.92719	9.9954	10.1631	9.8244
ENSMUSG00000016206	385.964	-0.0181778	0.0647295	0.136901	0.935103	H2-M3	histocompatibility 2, M region locus 3	17	10.4429	10.7055	10.5418	10.6697	10.8129	10.6411	10.9499	10.6915	10.7881	10.7823	10.6463
ENSMUSG00000016252	359.456	0.000116849	0.0607721	0.995431	0.999188	Atp5e	ATP synthase, H+ transporting, mitochondrial F1 complex, epsilon subunit	2	10.9773	10.5244	10.6945	10.8108	10.6168	10.6646	10.7241	10.636	10.8415	10.6522	10.7278
ENSMUSG00000016253	178.697	-0.00568134	0.0621062	0.40935	0.935103	Nelfcd	negative elongation factor complex member C/D, Th1l	2	10.5596	10.07	10.2274	10.5028	10.5314	10.3813	10.2825	10.8122	10.3968	10.5454	10.4325
ENSMUSG00000016255	0.786334	0.000560239	0.0621166	0.567919	0.935103	Tubb1	tubulin, beta 1 class VI	2	9.81431	9.81431	9.78878	9.92391	9.78878	9.78878	9.81431	9.81431	9.83234	9.78878	9.78878
ENSMUSG00000016256	1831.62	-0.0463895	0.0793848	0.0865558	0.935103	Ctsz	cathepsin Z	2	11.5531	11.6224	11.8193	11.6091	11.7469	11.548	11.9233	11.774	11.8434	11.6888	11.7721
ENSMUSG00000016257	212.091	-0.00876278	0.0625619	0.248681	0.935103	Prelid3b	PRELI domain containing 3B	2	10.4803	10.3093	10.1737	10.7333	10.4467	10.4125	10.6266	10.5665	10.5454	10.746	10.412
ENSMUSG00000016308	156.945	0.000410743	0.0618329	0.957602	0.997246	Ube2a	ubiquitin-conjugating enzyme E2A	X	10.2046	10.6061	10.3405	10.5562	10.2346	10.2413	10.038	10.5756	10.3827	10.5112	10.2261
ENSMUSG00000016319	1705.91	0.00245935	0.0589886	0.905254	0.990764	Slc25a5	solute carrier family 25 (mitochondrial carrier, adenine nucleotide translocator), member 5	X	11.4883	11.764	11.3474	11.7586	11.7548	11.6721	11.5641	11.6993	11.6885	11.5835	11.5977
ENSMUSG00000016327	1.44418	0.000470589	0.0621186	0.551649	0.935103	Atp1b4	ATPase, (Na+)/K+ transporting, beta 4 polypeptide	X	9.7775	9.96984	9.82558	9.82558	9.82558	9.82558	9.7775	9.7775	9.82558	9.82558	9.82558
ENSMUSG00000016344	487.827	-0.00774745	0.0612851	0.567951	0.935103	Ppdpf	pancreatic progenitor cell differentiation and proliferation factor	2	10.9181	10.763	10.7131	10.7778	10.8602	10.9649	10.6299	11.1043	10.9531	10.9192	10.7884
ENSMUSG00000016346	18.7063	-0.000480884	0.0621156	0.728405	0.966487	Kcnq2	potassium voltage-gated channel, subfamily Q, member 2	2	9.68929	9.95125	9.91379	9.91379	9.91379	9.91379	9.68929	10.3253	9.91379	9.91379	9.91379
ENSMUSG00000016409	487.501	0.00167255	0.0618491	0.763818	0.969546	Nkap	NFKB activating protein	X	10.42	10.7559	11.0407	11.2611	10.559	10.6824	10.6043	11.1774	10.4648	10.3075	10.8602
ENSMUSG00000016427	148.592	0.0069834	0.0618235	0.495394	0.935103	Ndufa1	NADH:ubiquinone oxidoreductase subunit A1	X	10.3655	10.4218	10.6067	10.2714	10.4596	10.3193	10.3468	10.4259	10.4207	10.3506	10.3017
ENSMUSG00000016477	182.195	0.00277614	0.0617452	0.723636	0.965325	E2f3	E2F transcription factor 3	13	10.7711	10.1067	10.4412	10.6182	10.4247	10.358	10.4074	10.5025	10.2768	10.5072	10.5023
ENSMUSG00000016481	317.634	-0.0291463	0.0699209	0.0803368	0.932339	Cr1l	complement component (3b/4b) receptor 1-like	1	10.4953	10.632	10.5184	10.6055	10.7006	10.5914	10.8529	10.5977	10.7586	10.677	10.6598
ENSMUSG00000016487	109.428	0.00180741	0.0619568	0.703194	0.960518	Ppfibp1	PTPRF interacting protein, binding protein 1 (liprin beta 1)	6	10.2962	10.495	9.97385	10.0456	10.3958	10.3867	10.0534	10.1805	10.178	10.5449	10.2692
ENSMUSG00000016493	3.49244	-0.000557249	0.0621194	0.122541	0.935103	Cd46	CD46 antigen, complement regulatory protein	1	9.93747	9.82022	9.78286	9.78286	9.78286	9.78286	9.82022	9.82022	9.93988	9.97745	9.89792
ENSMUSG00000016495	316.789	0.0169468	0.0637722	0.233421	0.935103	Plgrkt	plasminogen receptor, C-terminal lysine transmembrane protein	19	10.9085	10.5952	10.598	10.6849	10.6316	10.7683	10.561	10.5617	10.7378	10.5597	10.6159
ENSMUSG00000016496	800.997	0.00690172	0.0597973	0.697025	0.959335	Cd274	CD274 antigen	19	11.0009	11.1136	11.0754	11.1837	10.9808	11.0948	11.0596	11.0527	11.0625	10.8029	11.1969
ENSMUSG00000016498	84.4617	0.0126774	0.0637133	0.0582169	0.873349	Pdcd1lg2	programmed cell death 1 ligand 2	19	10.2601	10.2964	10.1718	10.5954	10.1136	10.138	10.1173	10.1444	10.2031	10.1762	10.0338
ENSMUSG00000016503	140.779	0.00233477	0.0617509	0.753037	0.969546	Gtf3a	general transcription factor III A	5	10.4907	10.3008	10.273	10.1301	10.2988	10.5964	10.4473	10.1166	10.3433	10.3889	10.3413
ENSMUSG00000016510	181.301	-0.0123901	0.0632383	0.164866	0.935103	Mtif3	mitochondrial translational initiation factor 3	5	10.3102	10.2272	10.3271	10.6271	10.4431	10.3724	10.6457	10.6037	10.3824	10.4917	10.4829
ENSMUSG00000016520	415.324	0.0123799	0.0633921	0.143592	0.935103	Lnx2	ligand of numb-protein X 2	5	11.3407	10.4565	10.835	11.0072	10.5937	10.6551	10.5683	10.5841	10.8105	10.5899	10.6706
ENSMUSG00000016526	14.2609	0.000758234	0.0620942	0.733864	0.967379	Dyrk3	dual-specificity tyrosine-(Y)-phosphorylation regulated kinase 3	1	9.87613	9.94888	9.83009	9.89918	9.72695	10.122	9.87613	9.87613	9.72695	10.1131	9.84201
ENSMUSG00000016528	819.848	0.0197358	0.065096	0.157853	0.935103	Mapkapk2	MAP kinase-activated protein kinase 2	1	11.4161	11.1161	11.2852	11.1617	11.0401	11.1822	10.7206	11.2326	11.1395	10.9679	11.0729
ENSMUSG00000016529	3.82957	-0.000563519	0.0621022	0.765053	0.969546	Il10	interleukin 10	1	9.85079	9.85079	9.75229	9.75229	9.90443	9.88166	9.85079	9.85079	9.88295	9.85396	9.92798
ENSMUSG00000016534	485.296	0.511604	0.414323	0.00361503	0.337347	Lamp2	lysosomal-associated membrane protein 2	X	10.9324	11.0235	10.8128	10.9071	10.8516	10.983	10.7789	10.4476	10.6943	10.7378	10.5827
ENSMUSG00000016541	343.424	0.041576	0.0817075	0.0154288	0.636639	Atxn10	ataxin 10	15	10.8795	10.7334	10.6962	10.6919	10.6222	10.7245	10.5208	10.4657	10.6774	10.5902	10.5466
ENSMUSG00000016552	129.97	-0.00802911	0.0625217	0.233963	0.935103	Foxred2	FAD-dependent oxidoreductase domain containing 2	15	10.4047	10.2442	10.2801	10.4158	10.2082	10.2345	10.6706	10.0301	10.5591	10.2633	10.4007
ENSMUSG00000016554	1333.38	0.00509286	0.060515	0.720856	0.964232	Eif3d	eukaryotic translation initiation factor 3, subunit D	15	11.774	11.3882	11.3901	11.684	11.5098	11.2722	11.1875	11.5754	11.6424	11.4148	11.4556
ENSMUSG00000016559	2740.25	-0.0157834	0.0604318	0.456761	0.935103	H3f3b	H3.3 histone B	11	11.8066	12.034	12.0035	12.2068	12.0229	12.0343	12.1249	12.2429	11.9604	11.9588	12.1778
ENSMUSG00000016619	653.12	0.0196855	0.0647532	0.186879	0.935103	Nup50	nucleoporin 50	15	11.1332	11.1464	10.969	10.78	11.0437	11.1245	10.9198	10.7077	10.9216	10.9766	11.022
ENSMUSG00000016637	249.021	0.00512413	0.0617585	0.553495	0.935103	Ift27	intraflagellar transport 27	15	10.4965	10.4002	10.6503	10.7404	10.5546	10.5457	10.7778	10.4584	10.5218	10.2982	10.4216
ENSMUSG00000016664	868.557	0.00873128	0.0618651	0.440121	0.935103	Pacsin2	protein kinase C and casein kinase substrate in neurons 2	15	11.4914	10.965	10.8653	11.3339	11.2636	11.3002	10.8881	11.2885	10.9351	11.2142	11.1955
ENSMUSG00000016756	557.417	0.00266226	0.0611626	0.816776	0.976392	Cmah	cytidine monophospho-N-acetylneuraminic acid hydroxylase	13	10.7412	11.0933	10.6979	10.6342	10.8985	11.1688	10.8182	10.8195	10.6994	10.902	11.0754
ENSMUSG00000016757	117.065	0.0023262	0.0616208	0.774858	0.970758	Ttll12	tubulin tyrosine ligase-like family, member 12	15	10.1469	10.3283	10.3816	10.4616	10.2852	10.2728	10.3732	10.3535	10.264	10.3345	10.1039
ENSMUSG00000016831	635.484	-0.0190971	0.0649013	0.150331	0.935103	Tox4	TOX high mobility group box family member 4	14	10.9713	10.8809	10.79	10.9551	10.8098	10.977	10.7973	11.1995	11.343	11.0178	10.8429
ENSMUSG00000016833	102.537	-0.00277217	0.0618345	0.651015	0.948676	Mrps18c	mitochondrial ribosomal protein S18C	5	10.1744	10.0916	10.389	10.2711	10.3253	10.2536	10.1992	10.665	10.2354	10.2153	10.288
ENSMUSG00000016921	967.563	-0.0195	0.0647917	0.178624	0.935103	Srsf6	serine and arginine-rich splicing factor 6	2	11.2299	10.9567	11.1187	11.1234	11.2845	11.0008	11.0076	11.5559	11.3038	11.1876	11.2939
ENSMUSG00000016933	417.834	-0.0125028	0.0635519	0.0891305	0.935103	Plcg1	phospholipase C, gamma 1	2	10.6143	10.3407	10.9399	10.3787	10.5632	10.8534	10.7399	11.2518	10.6987	11.1265	10.5965
ENSMUSG00000016940	96.8485	0.004211	0.0621168	0.367451	0.935103	Kctd2	potassium channel tetramerisation domain containing 2	11	10.7111	10.3024	10.3069	10.1561	10.1503	10.2804	10.0136	9.96185	10.2126	10.2525	10.3719
ENSMUSG00000016946	140.371	0.00148532	0.0619525	0.769082	0.970361	Kctd5	potassium channel tetramerisation domain containing 5	17	9.85659	10.5706	10.255	10.4091	10.4707	10.4309	10.4405	10.4788	10.4137	10.18	10.197
ENSMUSG00000016984	164.804	0.00691063	0.0620576	0.419177	0.935103	Etaa1	Ewing tumor-associated antigen 1	11	10.4628	10.3166	10.4866	10.6071	10.4146	10.3947	10.5606	10.3179	10.3684	10.1735	10.4564
ENSMUSG00000017002	5.47705	0.00061994	0.0621176	0.534945	0.935103	Slpi	secretory leukocyte peptidase inhibitor	2	9.84214	9.84214	10.0971	9.87798	9.76094	9.76094	9.84214	9.84214	9.87618	9.76094	9.76094
ENSMUSG00000017009	2141.34	-0.00235876	0.0607232	0.87743	0.98732	Sdc4	syndecan 4	2	11.8232	11.7508	11.5915	11.8132	11.8361	11.7776	12.1778	11.2965	11.6452	11.6651	12.0058
ENSMUSG00000017132	1446.84	-0.000297394	0.0604735	0.979645	0.999188	Cyth1	cytohesin 1	11	11.4586	11.3909	11.774	11.6805	11.2541	11.4381	11.3127	11.8299	11.2966	11.501	11.542
ENSMUSG00000017144	1.66094	0.000443496	0.0621132	0.694959	0.959335	Rnd3	Rho family GTPase 3	2	9.82528	9.82528	9.85075	9.95003	9.77781	9.77781	9.82528	9.82528	9.86493	9.77781	9.77781
ENSMUSG00000017146	62.1936	-0.00325641	0.0620952	0.439824	0.935103	Brca1	breast cancer 1, early onset	11	9.93387	10.133	9.97811	9.80435	10.1297	10.3015	10.1989	10.0829	10.3571	10.0133	10.0261
ENSMUSG00000017176	137.689	-0.0184522	0.0654976	0.046667	0.836636	Nt5c3b	5'-nucleotidase, cytosolic IIIB	11	10.1292	10.3221	10.2022	10.208	10.3855	10.436	10.4896	10.4767	10.4144	10.4972	10.3375
ENSMUSG00000017188	111.112	0.0042213	0.0620566	0.447368	0.935103	Coa3	cytochrome C oxidase assembly factor 3	11	10.4882	10.4133	10.2316	10.3766	10.3136	10.1322	9.95878	10.267	10.3286	10.167	10.4232
ENSMUSG00000017195	9.15106	-0.00653738	0.0625921	0.013117	0.613875	Zpbp2	zona pellucida binding protein 2	11	9.76877	9.89474	9.83431	9.83431	9.89401	9.92581	9.99194	10.0319	9.92144	9.95171	10.0913
ENSMUSG00000017210	272.348	0.0131867	0.0636212	0.12232	0.935103	Med24	mediator complex subunit 24	11	10.9353	10.4472	10.3709	10.7411	10.6929	10.7779	10.6577	10.3101	10.5232	10.4053	10.6016
ENSMUSG00000017221	336.852	-0.00590226	0.0621158	0.394001	0.935103	Psmd3	proteasome (prosome, macropain) 26S subunit, non-ATPase, 3	11	10.081	10.7813	10.5048	10.6944	10.7253	10.6161	10.9875	10.7159	10.7106	10.6346	10.6042
ENSMUSG00000017264	584.121	-0.00780809	0.0616295	0.505604	0.935103	Exosc10	exosome component 10	4	10.6187	10.9515	10.7325	11.0567	10.9039	10.9129	10.8572	11.1479	11.0129	10.7051	10.9326
ENSMUSG00000017286	420.84	-0.00319481	0.0619331	0.546166	0.935103	Glod4	glyoxalase domain containing 4	11	10.1294	10.6493	10.7144	10.7625	10.9442	10.8144	11.4746	10.6901	10.6976	10.6184	10.5995
ENSMUSG00000017288	284.102	0.00806977	0.0622832	0.350429	0.935103	Vps53	VPS53 GARP complex subunit	11	10.9054	10.4838	10.5122	10.8033	10.4045	10.5959	10.3765	10.5252	10.7977	10.452	10.4436
ENSMUSG00000017291	1334.67	-0.00845326	0.0601173	0.635365	0.945707	Taok1	TAO kinase 1	11	11.6532	11.3176	11.3786	11.3824	11.4646	11.5038	11.2357	11.6769	11.4599	11.5458	11.5609
ENSMUSG00000017299	152.877	0.0068522	0.0621652	0.389038	0.935103	Dnttip1	deoxynucleotidyltransferase, terminal, interacting protein 1	2	10.4661	10.5522	10.237	10.6824	10.245	10.3717	10.2969	10.259	10.4467	10.3996	10.3722
ENSMUSG00000017307	117.216	0.0128534	0.0633886	0.168445	0.935103	Acot8	acyl-CoA thioesterase 8	2	10.5693	10.2321	10.4598	10.3849	10.3281	10.2464	10.3211	10.1939	10.3542	10.2896	10.2408
ENSMUSG00000017344	2.86061	-0.000558198	0.0621197	0.545712	0.935103	Vtn	vitronectin	11	9.76773	9.76773	9.83535	9.83535	9.83535	9.83535	10.0382	9.76773	9.83535	9.83535	9.83535
ENSMUSG00000017376	352.402	-0.0147539	0.0641002	0.0956449	0.935103	Nlk	nemo like kinase	11	10.3848	10.7002	10.5968	10.7913	10.4536	10.4808	10.8709	10.6778	10.8573	11.0606	10.3687
ENSMUSG00000017386	432.48	-0.0095813	0.0622708	0.342207	0.935103	Traf4	TNF receptor associated factor 4	11	10.4111	10.7136	10.9317	10.7875	10.6982	10.7344	10.9835	10.9321	10.668	10.6832	10.8176
ENSMUSG00000017390	98.9844	-0.00150631	0.0620957	0.428945	0.935103	Aldoc	aldolase C, fructose-bisphosphate	11	9.68559	10.0694	10.1149	10.0526	10.1407	10.2436	9.68559	11.0669	10.0552	10.129	10.1522
ENSMUSG00000017400	27.6853	-0.000574597	0.0620383	0.836013	0.978256	Stac2	SH3 and cysteine rich domain 2	11	10.083	10.1106	9.97304	9.98831	10.0003	9.9061	9.99196	9.84867	10.1991	10.1723	9.82085
ENSMUSG00000017404	20116.7	0.0073443	0.0509125	0.957051	0.997246	Rpl19	ribosomal protein L19	11	14.4633	14.3648	14.4345	14.5787	14.4817	14.3993	14.5278	14.4689	14.5006	14.3786	14.4201
ENSMUSG00000017405	74.7929	-0.00829079	0.0623625	0.312093	0.935103	Nek8	NIMA (never in mitosis gene a)-related expressed kinase 8	11	10.1254	10.2602	10.2633	10.1518	10.1135	10.1661	10.372	10.0732	10.2344	10.2974	10.2273
ENSMUSG00000017412	12.2034	-4.7544e-05	0.0620767	0.976024	0.999188	Cacnb4	calcium channel, voltage-dependent, beta 4 subunit	2	9.81005	10.0867	9.86597	9.79303	10.0758	9.85774	9.81005	9.98474	9.90828	9.85174	10.1076
ENSMUSG00000017418	230.719	0.000437835	0.0618991	0.933177	0.993987	Arl5b	ADP-ribosylation factor-like 5B	2	10.3352	10.175	10.9204	10.3485	10.6978	10.3782	10.5358	10.9557	10.3511	10.3843	10.4226
ENSMUSG00000017421	1232.65	0.0134345	0.0589721	0.556954	0.935103	Zfp207	zinc finger protein 207	11	11.4187	11.3308	11.5421	11.2725	11.4712	11.4747	11.405	11.4435	11.2971	11.3512	11.3877
ENSMUSG00000017428	438.463	-0.00866322	0.0619642	0.441755	0.935103	Psmd11	proteasome (prosome, macropain) 26S subunit, non-ATPase, 11	11	10.9762	10.3861	10.8297	10.7432	10.7774	10.764	10.983	10.8253	10.6649	10.8493	10.92
ENSMUSG00000017466	6.74672	-0.000341135	0.0621065	0.819002	0.976392	Timp2	tissue inhibitor of metalloproteinase 2	11	9.853	9.853	9.75008	10.0115	9.75008	9.79584	9.853	9.853	10.0482	9.75008	9.86514
ENSMUSG00000017478	457.263	0.0088883	0.0628309	0.0788118	0.931863	Zc3h18	zinc finger CCCH-type containing 18	8	10.083	11.4148	11.1136	10.817	10.5265	11.1407	10.7982	10.6401	10.3972	10.6519	10.4911
ENSMUSG00000017485	2536.99	0.00113465	0.0608679	0.939104	0.995524	Top2b	topoisomerase (DNA) II beta	14	12.1162	11.9984	12.0399	11.6343	11.8715	12.5119	12.3396	11.6325	11.7612	12.0878	12.2454
ENSMUSG00000017548	683.423	0.00212274	0.0615274	0.805444	0.97478	Suz12	SUZ12 polycomb repressive complex 2 subunit	11	10.6991	11.3769	10.8694	11.3354	10.7701	10.8772	10.6693	11.1578	10.7438	11.237	10.9976
ENSMUSG00000017550	96.4951	-0.0032266	0.0618586	0.624103	0.943149	Atad5	ATPase family, AAA domain containing 5	11	10.0141	10.3188	10.0948	10.3577	10.2932	10.3328	10.2725	10.444	10.3233	10.2497	10.1848
ENSMUSG00000017561	820.905	0.00610521	0.0617236	0.541076	0.935103	Crlf3	cytokine receptor-like factor 3	11	11.5951	11.0142	10.7411	11.3473	10.976	11.0895	10.9737	10.8045	11.1648	11.2241	11.1353
ENSMUSG00000017615	79.8671	0.0046012	0.0620468	0.469144	0.935103	Tnfaip1	tumor necrosis factor, alpha-induced protein 1 (endothelial)	11	10.42	10.0371	10.087	10.1305	10.3059	10.4254	10.1966	10.2152	10.1372	10.1491	10.2855
ENSMUSG00000017631	605.854	0.0115127	0.062625	0.295047	0.935103	Abr	active BCR-related gene	11	11.0612	10.7174	11.2347	10.7416	11.1472	11.0065	10.9323	11.0091	10.8517	10.6185	10.9099
ENSMUSG00000017639	19.7067	-0.00124205	0.0620949	0.389136	0.935103	Rab11fip4	RAB11 family interacting protein 4 (class II)	11	9.82214	9.82214	9.91408	10.0049	10.169	9.88324	10.1281	10.1198	9.98513	9.86397	9.99087
ENSMUSG00000017652	880.018	-0.00665909	0.0611361	0.612664	0.94002	Cd40	CD40 antigen	2	11.3775	11.2499	11.1139	11.2353	11.0816	11.0465	11.3109	10.8545	11.1058	11.3358	11.4686
ENSMUSG00000017664	287.504	-0.0210215	0.0656972	0.131663	0.935103	Slc35c2	solute carrier family 35, member C2	2	10.5683	10.4241	10.5363	10.6371	10.5869	10.4795	10.6069	10.7459	10.7444	10.46	10.6596
ENSMUSG00000017667	3.31831	-0.000560612	0.0621198	0.542687	0.935103	Zfp334	zinc finger protein 334	2	9.76513	9.76513	9.83795	9.83795	9.83795	9.83795	10.0564	9.76513	9.83795	9.83795	9.83795
ENSMUSG00000017670	165.569	0.00934802	0.0622181	0.386088	0.935103	Elmo2	engulfment and cell motility 2	2	10.5569	10.4751	10.5601	10.4911	10.3377	10.3004	10.4024	10.2582	10.3891	10.4965	10.3871
ENSMUSG00000017677	230.025	-0.00181028	0.0612991	0.855718	0.983214	Wsb1	WD repeat and SOCS box-containing 1	11	10.6665	10.4534	10.362	10.4286	10.4986	10.4451	10.2829	10.5441	10.4752	10.6454	10.5524
ENSMUSG00000017679	888.869	-0.00904769	0.0602265	0.608175	0.939563	Ttpal	tocopherol (alpha) transfer protein-like	2	11.4149	11.023	11.1002	11.1133	11.178	11.1886	11.104	11.2238	11.1933	11.2025	11.364
ENSMUSG00000017686	248.694	-0.00574573	0.0616162	0.555915	0.935103	Rhot1	ras homolog family member T1	11	10.3373	10.4628	10.6159	10.4827	10.5211	10.7205	10.7471	10.656	10.4271	10.5373	10.551
ENSMUSG00000017697	11.7909	-0.00217204	0.0621076	0.423058	0.935103	Ada	adenosine deaminase	2	9.80458	9.94064	9.7985	9.88127	10.0444	9.9814	9.98417	10.0341	9.87395	10.0672	9.93939
ENSMUSG00000017707	9084.48	-0.0184137	0.0593966	0.451118	0.935103	Serinc3	serine incorporator 3	2	13.2551	13.1602	13.2753	13.3683	13.318	13.2872	13.1972	13.6336	13.3758	13.2646	13.2913
ENSMUSG00000017713	17.8682	0.00198655	0.0621002	0.471545	0.935103	Tha1	threonine aldolase 1	11	10.1034	9.82872	10.1477	9.89141	9.98943	9.97366	9.82872	10.1022	9.92522	9.96449	9.86832
ENSMUSG00000017715	160.894	-0.00335941	0.0618729	0.618093	0.941945	Pgs1	phosphatidylglycerophosphate synthase 1	11	10.566	10.1699	10.2018	10.1701	10.5991	10.4128	10.6192	10.193	10.4218	10.4187	10.4849
ENSMUSG00000017716	17.3323	-0.000867558	0.0620742	0.7252	0.965854	Birc5	baculoviral IAP repeat-containing 5	11	9.83966	10.0751	9.76342	9.76342	10.0129	10.0219	9.89384	10.0062	10.0552	10.0565	10.0027
ENSMUSG00000017718	82.7941	-0.00106567	0.0618955	0.844643	0.980353	Afmid	arylformamidase	11	10.3235	9.99619	10.3664	10.1316	10.1629	10.2834	10.5469	10.0129	10.3084	10.0951	10.1913
ENSMUSG00000017721	469.756	0.015607	0.0635487	0.231062	0.935103	Pigt	phosphatidylinositol glycan anchor biosynthesis, class T	2	10.7982	10.9335	10.7894	10.6838	10.5892	11.0012	10.5521	10.7425	10.6698	10.7642	10.7981
ENSMUSG00000017734	9.18651	-0.0015552	0.0621219	0.288256	0.935103	Dbndd2	dysbindin (dystrobrevin binding protein 1) domain containing 2	2	9.84973	9.84973	9.89298	9.75335	9.87996	9.99519	10.0029	9.84973	9.75335	9.86317	10.0782
ENSMUSG00000017740	4.51851	-0.000717218	0.0621145	0.342135	0.935103	Slc12a5	solute carrier family 12, member 5	2	9.77946	9.77946	9.82362	9.82362	9.82362	9.92592	9.77946	10.0817	9.82362	9.94102	9.82362
ENSMUSG00000017747	100.234	0.00193149	0.0620808	0.500556	0.935103	Ghdc	GH3 domain containing	11	9.91367	10.6407	10.3244	10.3477	9.91258	9.95972	10.0933	10.0627	10.1299	10.4875	10.0813
ENSMUSG00000017754	63.9391	-0.0089391	0.0628846	0.0439102	0.830597	Pltp	phospholipid transfer protein	2	9.89265	10.0632	10.0077	10.0268	10.2463	10.1183	10.2932	10.2788	10.1816	10.1763	10.1665
ENSMUSG00000017756	95.8189	-0.00222305	0.0620984	0.399386	0.935103	Slc12a7	solute carrier family 12, member 7	13	9.74659	10.0984	9.98962	10.2494	10.4929	10.1229	10.1884	10.7847	10.284	10.1879	10.1048
ENSMUSG00000017760	753.146	0.103619	0.236645	0.0118332	0.588328	Ctsa	cathepsin A	2	11.1991	11.1952	11.1847	11.1276	11.2059	11.0975	10.9894	10.9691	11.1515	10.9726	10.8777
ENSMUSG00000017764	101.663	-0.00257825	0.0618414	0.690945	0.957968	Zswim1	zinc finger SWIM-type containing 1	2	9.98319	10.4459	10.2504	10.2781	10.2085	10.342	10.5122	10.1537	10.26	10.1953	10.3818
ENSMUSG00000017765	72.8866	0.000150743	0.0619158	0.981011	0.999188	Slc12a4	solute carrier family 12, member 4	8	10.2684	10.1245	10.091	10.2926	10.0428	10.1439	9.91259	10.2952	10.2759	10.1063	10.0987
ENSMUSG00000017767	3.77109	1.2674e-05	0.0621071	0.995927	0.999188	Spata25	spermatogenesis associated 25	2	9.83286	9.83286	10.0045	9.77022	9.77022	9.77022	9.83286	9.83286	9.97441	9.77022	9.77022
ENSMUSG00000017774	1808.5	0.0116446	0.06087	0.510597	0.935103	Myo1c	myosin IC	11	11.9034	11.6142	11.6482	11.9882	11.4947	11.6546	11.4939	11.7329	11.6036	11.6383	11.775
ENSMUSG00000017776	538.924	0.00429658	0.0614004	0.68241	0.955451	Crk	v-crk avian sarcoma virus CT10 oncogene homolog	11	11.1604	10.7118	10.7176	10.7858	11.0631	10.81	10.9875	10.5586	10.9741	10.7558	10.8756
ENSMUSG00000017778	232.129	0.0264708	0.0689829	0.0590998	0.878486	Cox7c	cytochrome c oxidase subunit 7C	13	10.6606	10.5599	10.7647	10.4582	10.5475	10.5113	10.5084	10.3804	10.5157	10.4227	10.4712
ENSMUSG00000017781	974.883	-0.00654876	0.060347	0.675223	0.953618	Pitpna	phosphatidylinositol transfer protein, alpha	11	11.0881	11.1105	11.3915	11.4258	11.1396	11.2455	11.403	11.428	11.1878	11.1434	11.2682
ENSMUSG00000017801	135.279	-0.0046751	0.0619572	0.449072	0.935103	Mlx	MAX-like protein X	11	10.1981	10.2031	10.3399	10.2799	10.2044	10.4761	10.5376	10.2429	10.3064	10.2657	10.1955
ENSMUSG00000017802	628.679	-0.0109626	0.0603638	0.548726	0.935103	Retreg3	reticulophagy regulator family member 3	11	10.8667	10.9511	10.9053	11.0765	10.996	10.8963	10.9137	11.1389	10.8752	10.9965	11.0273
ENSMUSG00000017830	208.071	-0.00729479	0.0625311	0.0939538	0.935103	Dhx58	DEXH (Asp-Glu-X-His) box polypeptide 58	11	10.0491	10.2006	10.4382	10.3765	10.4217	10.5938	11.0096	10.4946	10.4504	10.4425	10.3463
ENSMUSG00000017831	299.7	-0.00374011	0.0607817	0.764237	0.969546	Rab5a	RAB5A, member RAS oncogene family	17	10.4703	10.5066	10.7454	10.6295	10.5656	10.5539	10.6786	10.6707	10.5464	10.4713	10.5588
ENSMUSG00000017837	154.66	0.00551996	0.0621601	0.401367	0.935103	Nkiras2	NFKB inhibitor interacting Ras-like protein 2	11	10.1477	10.6578	10.6952	10.1426	10.5427	10.2088	10.3328	10.3631	10.3426	10.2828	10.4127
ENSMUSG00000017843	911.499	-0.00493221	0.0618446	0.542345	0.935103	Ppp2r5c	protein phosphatase 2, regulatory subunit B', gamma	12	10.4171	11.45	11.1874	10.8485	11.1937	11.2884	11.415	11.2867	11.3563	10.9955	11.1256
ENSMUSG00000017858	312.557	-0.00415175	0.0619759	0.463355	0.935103	Ift52	intraflagellar transport 52	2	10.2326	10.4943	10.5318	10.9119	10.6339	10.548	11.2168	10.4974	10.5411	10.5061	10.5993
ENSMUSG00000017897	4.99131	-0.000452593	0.0621185	0.2047	0.935103	Eya2	EYA transcriptional coactivator and phosphatase 2	2	10.0743	9.78749	9.81559	9.81559	9.81559	9.81559	9.78749	9.78749	10.0151	9.8743	9.86258
ENSMUSG00000017929	779.144	0.00107314	0.0619762	0.809082	0.974959	B4galt5	UDP-Gal:betaGlcNAc beta 1,4-galactosyltransferase, polypeptide 5	2	10.2856	11.0778	12.1437	10.1461	10.6012	10.8755	11.3377	10.7263	11.0921	10.1992	10.9402
ENSMUSG00000017950	1.2466	0.000745009	0.0621225	0.328449	0.935103	Hnf4a	hepatic nuclear factor 4, alpha	2	9.81431	9.81431	9.78877	9.9675	9.78877	9.78877	9.81431	9.81431	9.78877	9.78877	9.78877
ENSMUSG00000017969	1.45079	0.000758429	0.0621228	0.301199	0.935103	Ptgis	prostaglandin I2 (prostacyclin) synthase	2	9.82088	9.82088	9.90129	9.7822	9.7822	9.93389	9.82088	9.82088	9.7822	9.7822	9.7822
ENSMUSG00000017999	666.999	-0.00358139	0.0607832	0.67679	0.953618	Ddx27	DEAD box helicase 27	2	11.1039	10.7848	10.9426	10.9232	11.0727	11.149	11.1487	11.0231	11.282	10.8657	10.8705
ENSMUSG00000018001	71.8506	0.00188685	0.062046	0.609231	0.939563	Cyth3	cytohesin 3	5	9.93339	10.2284	10.4621	9.73728	10.0776	10.2482	10.1693	10.1	10.0558	9.99591	10.1774
ENSMUSG00000018008	1006.06	0.00638398	0.0618118	0.51613	0.935103	Cyth4	cytohesin 4	15	10.9224	11.7175	11.7268	10.9945	11.2046	11.1665	10.9125	11.4466	11.0977	11.3548	11.2035
ENSMUSG00000018040	467.599	0.00705056	0.062326	0.311486	0.935103	Rrp7a	ribosomal RNA processing 7 homolog A	15	10.4158	11.1832	10.4483	11.3436	10.8381	10.6067	10.706	10.6874	10.9445	10.4099	10.6455
ENSMUSG00000018042	637.801	0.0310849	0.0716671	0.0537639	0.854262	Cyb5r3	cytochrome b5 reductase 3	15	11.343	10.8701	11.0352	10.9125	11.0326	11.1837	10.8968	10.8239	10.8368	11.0019	10.8815
ENSMUSG00000018068	287.511	-0.00133134	0.062027	0.696247	0.959335	Ints2	integrator complex subunit 2	11	9.79808	10.6181	10.6378	10.524	10.4401	10.7141	11.3721	10.2732	10.3123	10.5352	10.444
ENSMUSG00000018076	972.148	0.0169391	0.0632406	0.285951	0.935103	Med13l	mediator complex subunit 13-like	5	11.333	11.4188	11.0961	11.241	11.2265	11.1181	11.0896	10.9309	11.0979	11.2835	11.2885
ENSMUSG00000018102	399.058	0.00362933	0.0616773	0.667598	0.951985	H2bc4	H2B clustered histone 4	13	10.9862	10.7902	10.6885	10.702	10.7887	10.4154	10.3421	10.6986	10.8013	10.9393	10.5946
ENSMUSG00000018143	356.02	-0.00993597	0.0629766	0.0858092	0.935103	Mafk	v-maf musculoaponeurotic fibrosarcoma oncogene family, protein K (avian)	5	10.3003	10.4786	10.7583	10.4521	10.5347	10.5345	10.4291	11.1745	10.7664	10.3252	10.7979
ENSMUSG00000018160	1054.61	0.00411599	0.0607962	0.78535	0.97236	Med1	mediator complex subunit 1	11	11.5571	11.3284	11.2298	11.4277	11.267	11.2364	11.336	11.0324	11.4905	11.5274	11.0157
ENSMUSG00000018166	71.1783	-0.000424468	0.0619216	0.956141	0.996936	Erbb3	erb-b2 receptor tyrosine kinase 3	10	9.89335	10.3035	9.99491	10.125	10.3011	10.2002	10.2829	10.1346	10.1054	10.1664	10.1821
ENSMUSG00000018167	88.9275	0.0073603	0.0624349	0.25062	0.935103	Stard3	START domain containing 3	11	10.2437	10.4455	10.1048	10.1945	10.2376	10.4313	10.2296	10.0082	10.324	10.2106	10.1195
ENSMUSG00000018168	3771.48	-0.00603599	0.0577873	0.765833	0.969546	Ikzf3	IKAROS family zinc finger 3	11	12.4305	12.3882	12.5947	12.1545	12.3412	12.5628	12.3924	12.5066	12.4647	12.5147	12.3733
ENSMUSG00000018169	139.178	-0.00183448	0.0617386	0.787096	0.972552	Mfng	MFNG O-fucosylpeptide 3-beta-N-acetylglucosaminyltransferase	15	10.4139	10.0912	10.1686	10.5424	10.2686	10.4883	10.4901	10.4086	10.3956	10.2683	10.3248
ENSMUSG00000018171	460.336	0.00392057	0.0613498	0.707886	0.962664	Vmp1	vacuole membrane protein 1	11	10.9105	10.6489	10.8509	11.0186	10.6263	10.9516	10.6358	11.0666	10.923	10.6724	10.6654
ENSMUSG00000018189	164.989	-0.0105331	0.0629072	0.186463	0.935103	Uchl5	ubiquitin carboxyl-terminal esterase L5	1	10.2381	10.1958	10.4161	10.5589	10.4484	10.2176	10.5506	10.6346	10.435	10.3816	10.3758
ENSMUSG00000018196	110.291	0.0027778	0.061834	0.669684	0.952348	Glrx2	glutaredoxin 2 (thioltransferase)	1	10.171	10.2989	10.3281	10.1589	10.4439	10.4651	10.5592	10.1997	10.2374	10.2273	10.2898
ENSMUSG00000018199	36.9164	0.0011404	0.0620382	0.930791	0.993896	Ro60	Ro60, Y RNA binding protein	1	10.1126	9.97403	9.98775	10.3291	10.0216	9.9168	9.83797	10.2515	10.1208	9.88963	10.0426
ENSMUSG00000018209	2658.27	0.0277504	0.0692599	0.078273	0.929589	Stk4	serine/threonine kinase 4	2	12.5481	12.1366	12.188	12.0338	11.7599	12.2317	11.7414	11.6725	12.1844	11.9602	11.8146
ENSMUSG00000018239	65.2397	0.00762769	0.0626266	0.105605	0.935103	Zcchc10	zinc finger, CCHC domain containing 10	11	10.1832	10.3903	10.246	10.1761	10.0123	10.2008	10.0832	9.92623	10.1846	10.12	10.0803
ENSMUSG00000018263	3.86893	-0.00131836	0.0621355	0.150008	0.935103	Tbx5	T-box 5	5	9.76999	9.76999	9.83309	9.83309	9.83309	9.83309	9.76999	10.0722	9.92022	9.83309	9.83309
ENSMUSG00000018286	429.657	0.0105689	0.0598227	0.591113	0.93638	Psmb6	proteasome (prosome, macropain) subunit, beta type 6	11	10.7391	10.8581	10.9091	10.771	10.8452	10.7658	10.7544	10.8568	10.7056	10.817	10.8011
ENSMUSG00000018287	340.791	0.0217244	0.0654348	0.174524	0.935103	Spag7	sperm associated antigen 7	11	10.8353	10.6868	10.6477	10.8107	10.7388	10.7468	10.5679	10.7133	10.5866	10.5922	10.7828
ENSMUSG00000018293	4295.94	-0.00794739	0.0568966	0.738396	0.967803	Pfn1	profilin 1	11	12.7486	12.3566	12.5817	12.4139	12.5716	12.5071	12.5874	12.4948	12.6635	12.5152	12.575
ENSMUSG00000018322	465.34	0.00198621	0.0587073	0.918151	0.992013	Tomm34	translocase of outer mitochondrial membrane 34	2	10.8869	10.7664	10.9512	10.8142	10.7449	10.784	10.8461	10.7907	10.7801	10.8917	10.7915
ENSMUSG00000018326	981.402	0.0058671	0.0610027	0.586428	0.935103	Ywhab	tyrosine 3-monooxygenase/tryptophan 5-monooxygenase activation protein, beta polypeptide	2	11.3204	10.9611	11.3784	11.2248	11.2733	11.2632	11.4843	11.0334	10.9682	11.1452	11.1457
ENSMUSG00000018334	228.334	-0.00253768	0.0615428	0.717744	0.963126	Ksr1	kinase suppressor of ras 1	11	10.3635	10.7491	10.4658	10.3555	10.3711	10.6951	10.6187	10.3452	10.7024	10.5273	10.5168
ENSMUSG00000018340	1186.51	-0.00711818	0.0598311	0.686933	0.956582	Anxa6	annexin A6	11	11.6054	11.2557	11.401	11.3751	11.3713	11.2124	11.2253	11.4663	11.5632	11.407	11.3874
ENSMUSG00000018347	146.56	-0.00388425	0.0618643	0.581638	0.935103	Zkscan6	zinc finger with KRAB and SCAN domains 6	11	10.5552	10.3057	10.2096	10.1793	10.2824	10.3546	10.1273	10.3868	10.5488	10.4621	10.3692
ENSMUSG00000018362	221.719	0.0171674	0.0624227	0.355286	0.935103	Kpna2	karyopherin (importin) alpha 2	11	10.5082	10.5555	10.5325	10.549	10.4613	10.4371	10.4797	10.4105	10.4598	10.5296	10.4499
ENSMUSG00000018363	401.811	-0.024496	0.0678425	0.0640893	0.89987	Smurf2	SMAD specific E3 ubiquitin protein ligase 2	11	10.5042	10.6401	10.7393	10.7263	10.8399	10.6269	10.9114	10.9757	10.7296	10.6587	10.9844
ENSMUSG00000018372	113.872	0.00373449	0.0621282	0.346139	0.935103	Cep95	centrosomal protein 95	11	10.294	10.0692	10.7837	10.0831	10.1456	10.4234	10.2663	10.4425	10.0508	10.1913	10.1982
ENSMUSG00000018377	770.634	0.00470241	0.0616127	0.627092	0.944272	Vezf1	vascular endothelial zinc finger 1	11	11.7475	10.7002	11.0736	10.9922	10.9403	11.2248	11.0838	10.8153	11.0168	11.2294	11.1299
ENSMUSG00000018378	21.6843	0.00260373	0.0621459	0.310268	0.935103	Cuedc1	CUE domain containing 1	11	9.97985	9.96968	10.1174	9.87838	10.1076	9.70615	9.89693	9.89693	9.85701	9.78917	10.0952
ENSMUSG00000018379	1446.82	-0.00250442	0.0603282	0.860659	0.985282	Srsf1	serine and arginine-rich splicing factor 1	11	11.6279	11.4483	11.5069	11.2756	11.7175	11.2827	11.1875	11.6879	11.4381	11.5834	11.6113
ENSMUSG00000018381	865.21	0.010594	0.0618317	0.436564	0.935103	Abi3	ABI family member 3	11	11.2009	11.0779	11.3846	10.8893	11.1104	11.3895	11.2986	10.9635	11.1616	11.0391	10.9722
ENSMUSG00000018395	28.3759	-0.00162434	0.0621082	0.270438	0.935103	Kif3a	kinesin family member 3A	11	9.89252	9.89252	10.0767	9.95398	10.0144	10.003	10.2669	9.89252	9.80796	10.0877	9.95887
ENSMUSG00000018398	1.25198	-0.000307576	0.0621148	0.812868	0.975766	Septin8	septin 8	11	9.78877	9.95136	9.81432	9.81432	9.81432	9.81432	9.78877	9.78877	9.81432	9.87303	9.8613
ENSMUSG00000018401	731.763	-0.00203295	0.0609121	0.863402	0.986211	Mtmr4	myotubularin related protein 4	11	10.7346	11.0709	11.3668	11.0141	10.9344	11.0181	11.2565	11.0765	11.0284	10.8978	10.9828
ENSMUSG00000018405	29.1864	0.00727495	0.0626682	0.0242605	0.726895	Mrm1	mitochondrial rRNA methyltransferase 1	11	10.1092	10.1019	10.0332	9.86415	9.9797	10.234	9.89	9.89	9.93924	9.92459	10.0097
ENSMUSG00000018412	1111.18	-0.00374296	0.0608233	0.806992	0.97478	Kansl1	KAT8 regulatory NSL complex subunit 1	11	11.2926	11.3956	11.1046	11.0463	11.4213	11.2502	10.9449	11.4335	11.3793	11.1346	11.5302
ENSMUSG00000018415	239.486	-0.0011898	0.0617087	0.861829	0.985747	Gid4	GID complex subunit 4, VID24 homolog	11	10.5878	10.4372	10.5301	10.5286	10.4572	10.6374	10.0879	10.9795	10.4183	10.5244	10.5656
ENSMUSG00000018417	4.00845	0.00126507	0.062133	0.157073	0.935103	Myo1b	myosin IB	1	9.81144	9.98196	9.99346	9.79164	9.96041	9.79164	9.81144	9.81144	9.79164	9.79164	9.85808
ENSMUSG00000018425	490.496	0.0247396	0.0681773	0.0546679	0.859803	Dhx40	DEAH (Asp-Glu-Ala-His) box polypeptide 40	11	11.1872	10.7104	10.864	10.9538	10.9084	11.0164	10.5886	10.9191	10.8875	10.7105	10.6189
ENSMUSG00000018427	222.457	-0.000341471	0.0617416	0.939653	0.995532	Ypel2	yippee like 2	11	10.5086	10.2736	10.3567	10.2254	10.7809	10.3616	10.3367	10.5334	10.0586	10.3814	10.7269
ENSMUSG00000018433	437.392	0.00538413	0.0603293	0.728477	0.966487	Nol11	nucleolar protein 11	11	10.9113	10.6935	10.7477	10.8519	10.6759	10.8607	10.6679	10.8401	10.6887	10.8905	10.7319
ENSMUSG00000018442	149.051	0.00549567	0.0621202	0.402246	0.935103	Derl2	Der1-like domain family, member 2	11	10.2275	10.779	10.3376	10.194	10.4666	10.4	10.1056	10.3422	10.4106	10.2982	10.4382
ENSMUSG00000018446	638.482	-0.00766748	0.0598136	0.66849	0.952196	C1qbp	complement component 1, q subcomponent binding protein	11	11.0565	10.8734	10.967	11.0823	11.1022	10.9083	11.1902	10.9418	10.9711	11.0297	11.0476
ENSMUSG00000018449	29.6189	-0.00166723	0.0620638	0.613965	0.940733	Rpain	RPA interacting protein	11	10.1997	9.79892	9.97771	9.80417	10.1332	10.0086	10.0469	10.0774	10.2022	10.0074	10.0817
ENSMUSG00000018451	10.0521	-0.000586438	0.0621202	0.521014	0.935103	6330403K07Rik	RIKEN cDNA 6330403K07 gene	11	9.71222	9.71222	9.89087	9.89087	9.89087	9.89087	10.0942	10.0448	9.89087	9.89087	9.89087
ENSMUSG00000018474	900.556	0.00187651	0.0616555	0.799137	0.974247	Chd3	chromodomain helicase DNA binding protein 3	11	10.9262	10.8548	11.5815	11.2632	11.0936	11.3612	11.0513	11.9047	11.1183	10.8694	11.0025
ENSMUSG00000018476	624.325	0.00488945	0.0620317	0.498263	0.935103	Kdm6b	KDM1 lysine (K)-specific demethylase 6B	11	10.7185	11.27	11.6914	10.3054	10.7394	10.8248	10.814	10.8031	11.1566	10.79	10.8023
ENSMUSG00000018481	326.782	-0.00192503	0.0618979	0.713077	0.963116	Appbp2	amyloid beta precursor protein (cytoplasmic tail) binding protein 2	11	10.1236	10.7109	10.6485	10.6319	10.5746	10.6763	10.3865	11.0993	10.4455	10.496	10.5875
ENSMUSG00000018501	1688.38	-0.00395764	0.0614073	0.683647	0.955469	Ncor1	nuclear receptor co-repressor 1	11	10.94	11.7057	11.9757	11.8365	11.6896	11.4176	12.1392	11.8565	11.5232	11.671	11.5089
ENSMUSG00000018507	323.223	-0.0041528	0.061507	0.668885	0.952196	Trpv2	transient receptor potential cation channel, subfamily V, member 2	11	10.3373	10.6179	10.6478	10.6309	10.7539	10.7721	10.9498	10.7055	10.6341	10.5421	10.5873
ENSMUSG00000018509	1.68844	0.000293942	0.0621102	0.808357	0.97491	Cenpv	centromere protein V	11	9.82192	9.82192	9.95973	9.78116	9.78116	9.78116	9.82192	9.82192	9.88786	9.78116	9.78116
ENSMUSG00000018541	313.209	-0.00388056	0.0617263	0.61899	0.942458	Cwc25	CWC25 spliceosome-associated protein	11	10.5713	10.3221	10.579	10.9855	10.6325	10.4167	10.8375	10.7478	10.5602	10.5806	10.5832
ENSMUSG00000018547	745.191	-0.0120463	0.0626981	0.300035	0.935103	Pip4k2b	phosphatidylinositol-5-phosphate 4-kinase, type II, beta	11	10.9701	11.2073	10.8106	11.178	10.9806	10.7979	10.8638	11.164	10.9717	11.1086	11.5117
ENSMUSG00000018548	197.709	-0.0145753	0.0642773	0.0363114	0.792591	Trim37	tripartite motif-containing 37	11	10.2674	10.2109	10.3239	10.3551	10.6439	10.2268	10.5096	10.7691	10.8128	10.305	10.4072
ENSMUSG00000018559	229.956	0.00356952	0.0617816	0.638863	0.946231	Ctdnep1	CTD nuclear envelope phosphatase 1	11	10.6464	10.5847	10.5559	10.256	10.59	10.6199	10.685	10.1196	10.557	10.5296	10.4542
ENSMUSG00000018565	93.133	0.0006889	0.0619594	0.88693	0.988206	Elp5	elongator acetyltransferase complex subunit 5	11	10.4627	10.2252	10.2182	10.2495	10.1867	10.2971	10.5277	9.72884	10.2652	10.1644	10.2717
ENSMUSG00000018566	0.859055	-0.000428429	0.062111	0.73938	0.968089	Slc2a4	solute carrier family 2 (facilitated glucose transporter), member 4	11	9.81625	9.81625	9.78683	9.8696	9.78683	9.78683	9.81625	9.81625	9.91002	9.78683	9.78683
ENSMUSG00000018567	837.538	-0.0228715	0.0641915	0.255306	0.935103	Gabarap	gamma-aminobutyric acid receptor associated protein	11	10.9802	11.1647	11.2392	10.9992	11.1523	11.153	11.3186	11.1633	11.2768	11.1461	11.1305
ENSMUSG00000018570	0.946471	-0.000949199	0.0621265	0.320034	0.935103	2810408A11Rik	RIKEN cDNA 2810408A11 gene	11	9.81267	9.81267	9.79042	9.79042	9.79042	9.79042	9.81267	9.81267	9.79042	9.79042	9.94617
ENSMUSG00000018572	298.142	-0.00766903	0.0620852	0.412456	0.935103	Phf23	PHD finger protein 23	11	10.4679	10.6295	10.5284	10.2362	10.7395	10.6826	10.4721	10.7995	10.7845	10.5734	10.6012
ENSMUSG00000018574	266.836	-0.0132016	0.063849	0.0501027	0.847197	Acadvl	acyl-Coenzyme A dehydrogenase, very long chain	11	10.2095	10.493	10.4278	10.679	10.4293	10.2742	11.0893	10.3345	10.8192	10.6934	10.3982
ENSMUSG00000018581	5.62749	-0.000437089	0.0621071	0.574781	0.935103	Dnah11	dynein, axonemal, heavy chain 11	12	9.82024	9.82024	9.78284	9.78284	9.88623	10.0247	10.0154	9.82024	9.86996	9.95392	9.78284
ENSMUSG00000018583	2171.93	-0.0120221	0.0618724	0.40695	0.935103	G3bp1	GTPase activating protein (SH3 domain) binding protein 1	11	11.481	11.8392	11.8275	11.9173	11.927	11.8112	11.7942	12.2884	12.1042	11.6515	11.7162
ENSMUSG00000018585	150.11	-0.00730805	0.0626225	0.0817836	0.932339	Atox1	antioxidant 1 copper chaperone	11	10.3444	9.7907	10.331	9.99623	10.2404	10.4472	10.4028	10.8316	10.5585	10.4944	10.329
ENSMUSG00000018599	51.0077	0.00524143	0.0624133	0.0150038	0.63054	Mief2	mitochondrial elongation factor 2	11	9.93335	10.2889	9.88837	10.4637	9.83315	10.1623	9.93335	9.93335	9.9159	9.91853	9.97366
ENSMUSG00000018651	37.1808	2.83985	0.959728	8.25681e-05	0.0183858	Tada2a	transcriptional adaptor 2A	11	9.98312	10.16	10.2213	9.94434	10.048	10.2225	9.92448	9.92448	9.82304	9.85464	9.87218
ENSMUSG00000018654	4660.89	0.00472443	0.0582452	0.822176	0.976392	Ikzf1	IKAROS family zinc finger 1	11	12.7889	12.5893	12.4724	12.6069	12.5806	12.5542	12.2918	12.6665	12.6384	12.4518	12.7844
ENSMUSG00000018659	137.579	-0.00116738	0.0618427	0.847111	0.980605	Pnpo	pyridoxine 5'-phosphate oxidase	11	10.3086	10.4434	10.428	10.2163	10.374	10.2918	9.95336	10.6386	10.4579	10.2288	10.3552
ENSMUSG00000018661	325.832	-0.00724965	0.0623137	0.312769	0.935103	Cog1	component of oligomeric golgi complex 1	11	10.6918	10.7977	10.5796	10.2466	10.3704	10.7378	10.409	10.6349	10.8318	11.0741	10.5932
ENSMUSG00000018666	551.532	0.0172659	0.0647007	0.116836	0.935103	Cbx1	chromobox 1	11	11.2897	10.9323	11.1628	10.8361	10.6356	11.1595	10.7221	10.7319	10.9044	10.8603	10.8744
ENSMUSG00000018669	244.25	-0.0118394	0.0634335	0.0659228	0.906843	Cdk5rap3	CDK5 regulatory subunit associated protein 3	11	10.2941	10.2314	10.5566	10.2219	10.3626	10.7707	10.9009	10.6548	10.7845	10.3863	10.5595
ENSMUSG00000018677	241.973	0.000472463	0.0615121	0.952458	0.996612	Slc25a39	solute carrier family 25, member 39	11	10.8348	10.3599	10.5605	10.2673	10.5541	10.6997	10.4728	10.5258	10.6815	10.5863	10.4889
ENSMUSG00000018678	222.499	-0.00177767	0.0616124	0.819207	0.976392	Sp2	Sp2 transcription factor	11	10.1367	10.6674	10.3758	10.65	10.4175	10.6117	10.509	10.6912	10.5158	10.4462	10.4905
ENSMUSG00000018697	373.027	0.00241391	0.0610216	0.83839	0.978492	Aatf	apoptosis antagonizing transcription factor	11	10.4272	10.8574	10.7805	10.7976	10.787	10.6144	10.8213	10.7225	10.7373	10.5848	10.6481
ENSMUSG00000018707	2512.6	0.00430751	0.0610366	0.729623	0.966487	Dync1h1	dynein cytoplasmic 1 heavy chain 1	12	12.1807	11.9598	12.0479	12.0193	12.0016	12.1444	12.619	11.2742	11.8585	12.0348	11.9524
ENSMUSG00000018733	48.541	0.00109867	0.0619389	0.82467	0.976392	Pex12	peroxisomal biogenesis factor 12	11	10.2269	10.0864	10.0688	10.1181	10.0291	10.1173	10.172	9.88077	10.2315	9.98454	10.0913
ENSMUSG00000018736	244.538	0.00898811	0.0625364	0.267678	0.935103	Ndel1	nudE neurodevelopment protein 1 like 1	11	10.5331	10.5733	10.7084	10.5782	10.4249	10.7292	10.7182	10.2799	10.4683	10.2021	10.572
ENSMUSG00000018740	40.5954	-0.00248609	0.0621359	0.317301	0.935103	Slc25a35	solute carrier family 25, member 35	11	9.7841	10.3667	10.0208	9.88657	9.91336	10.0334	10.2605	9.7841	10.2194	10.0746	10.1938
ENSMUSG00000018750	1205.08	-0.00703197	0.0620507	0.428923	0.935103	Zbtb4	zinc finger and BTB domain containing 4	11	11.1201	11.0388	11.1562	11.9228	11.3058	11.1745	11.2203	12.0713	11.5097	11.2199	11.2494
ENSMUSG00000018761	121.541	0.000848924	0.0620044	0.826956	0.976517	Mpdu1	mannose-P-dolichol utilization defect 1	11	10.44	10.4511	10.1117	10.5187	10.1683	10.0553	9.85754	10.2968	10.4104	10.0045	10.5606
ENSMUSG00000018765	255.872	0.00744254	0.0625243	0.181939	0.935103	Fxr2	fragile X mental retardation, autosomal homolog 2	11	10.1623	11.2881	10.5894	10.5922	10.3842	10.5514	10.1768	10.4159	10.6153	10.3036	10.5391
ENSMUSG00000018770	343.973	0.000427027	0.0612369	0.969675	0.998315	Atp5g3	ATP synthase, H+ transporting, mitochondrial F0 complex, subunit C3 (subunit 9)	2	10.7792	10.4141	10.4646	10.854	10.7375	10.7455	10.8507	10.633	10.6509	10.5368	10.6954
ENSMUSG00000018774	90.0188	0.00229778	0.0620289	0.563932	0.935103	Cd68	CD68 antigen	11	10.6154	10.1728	10.3155	10.1933	10.1797	10.2096	9.74699	10.3593	10.2373	10.2699	10.16
ENSMUSG00000018796	210.003	-0.00313743	0.0616853	0.696251	0.959335	Acsl1	acyl-CoA synthetase long-chain family member 1	8	10.3633	10.7131	10.3508	10.3375	10.4362	10.3793	10.2932	10.4438	10.7084	10.6287	10.3327
ENSMUSG00000018800	99.8247	-0.0055216	0.0623095	0.188014	0.935103	Abca5	ATP-binding cassette, sub-family A (ABC1), member 5	11	10.2861	10.3246	10.1683	9.99496	9.99882	10.1477	10.1258	10.1239	10.2624	10.1703	10.7631
ENSMUSG00000018809	111.142	0.000379589	0.0619478	0.935747	0.994571	Smyd4	SET and MYND domain containing 4	11	10.2326	10.2896	10.5544	10.0815	10.2209	10.0769	9.9341	10.4371	10.2367	10.0702	10.3228
ENSMUSG00000018819	1768.06	-0.0160427	0.0628487	0.309038	0.935103	Lsp1	lymphocyte specific 1	7	11.354	12.0079	11.674	11.5199	11.6893	11.6103	11.528	11.9359	11.9118	11.8093	11.7306
ENSMUSG00000018820	158.937	-0.00399293	0.0619092	0.535207	0.935103	Zfyve27	zinc finger, FYVE domain containing 27	19	10.1329	10.3292	10.3492	10.537	10.3521	10.3926	10.407	10.5955	10.3644	10.1138	10.4539
ENSMUSG00000018821	7.63395	0.00113072	0.0621205	0.28184	0.935103	Avpi1	arginine vasopressin-induced 1	19	9.79368	10.1492	9.95523	9.8094	9.95558	9.88864	9.79368	9.79368	9.8094	9.8094	9.95029
ENSMUSG00000018841	252.108	-0.000490159	0.0619511	0.914979	0.9913	Rad51d	RAD51 paralog D	11	10.9366	10.4997	10.8464	10.1368	10.3803	10.2713	10.6824	9.89004	10.8603	10.382	10.6383
ENSMUSG00000018846	387.047	-0.000202386	0.0611981	0.981094	0.999188	Pank3	pantothenate kinase 3	11	10.8551	10.7453	10.4763	10.7499	10.6892	10.8453	10.4216	10.8736	10.7769	10.6513	10.8785
ENSMUSG00000018848	391.893	-0.00875545	0.0619965	0.422066	0.935103	Rars	arginyl-tRNA synthetase	11	10.3881	10.9157	10.7228	10.7188	10.8159	10.5291	10.8071	10.8064	10.7043	10.7296	10.8846
ENSMUSG00000018858	136.413	0.00401296	0.06126	0.717292	0.963126	Mrpl58	mitochondrial ribosomal protein L58	11	10.4673	10.3332	10.43	10.3927	10.4422	10.2328	10.3953	10.2956	10.2972	10.4375	10.3776
ENSMUSG00000018861	76.4617	-0.00658396	0.0624745	0.100808	0.935103	Fdxr	ferredoxin reductase	11	9.8603	10.1067	10.1707	10.2678	10.0378	10.1582	10.435	10.2996	10.085	10.2794	10.2288
ENSMUSG00000018882	261.304	-0.00236003	0.0612891	0.803437	0.97478	Mrpl45	mitochondrial ribosomal protein L45	11	10.3532	10.8596	10.6023	10.5103	10.5625	10.4547	10.6282	10.4422	10.6404	10.5379	10.6877
ENSMUSG00000018899	796.257	0.0189445	0.0639448	0.234285	0.935103	Irf1	interferon regulatory factor 1	11	11.3627	11.0833	10.9298	11.281	11.1829	11.0605	11.0656	10.8941	11.0978	11.0511	11.1067
ENSMUSG00000018900	42.421	-0.00243125	0.0620446	0.501234	0.935103	Slc22a5	solute carrier family 22 (organic cation transporter), member 5	11	9.91023	10.0252	9.96539	10.2685	9.88617	10.1301	10.0978	10.1571	10.0153	10.0467	10.021
ENSMUSG00000018906	0.719339	-0.00022347	0.0621077	0.949328	0.995953	P4ha2	procollagen-proline, 2-oxoglutarate 4-dioxygenase (proline 4-hydroxylase), alpha II polypeptide	11	9.81187	9.81187	9.79121	9.79121	9.83343	9.88271	9.81187	9.86457	9.85282	9.83273	9.79121
ENSMUSG00000018916	2.18189	-0.000983536	0.0621278	0.169392	0.935103	Csf2	colony stimulating factor 2 (granulocyte-macrophage)	11	9.82321	9.82321	9.77988	9.77988	9.77988	9.77988	9.82321	9.82321	10.0018	9.77988	9.86124
ENSMUSG00000018921	251.579	0.00681217	0.0614609	0.570593	0.935103	Pelp1	proline, glutamic acid and leucine rich protein 1	11	10.6731	10.4147	10.4753	10.3522	10.5478	10.6365	10.5142	10.4121	10.4707	10.4844	10.558
ENSMUSG00000018923	218.55	-0.00535502	0.0615779	0.59572	0.936825	Med11	mediator complex subunit 11	11	10.2686	10.6258	10.3509	10.6463	10.5187	10.4502	10.4958	10.6245	10.6082	10.5134	10.4379
ENSMUSG00000018927	5.08276	-0.000423812	0.0621077	0.77185	0.970758	Ccl6	chemokine (C-C motif) ligand 6	11	9.84783	9.84783	9.95264	9.75525	9.84963	9.75525	9.84783	9.84783	9.75525	10.0302	9.83661
ENSMUSG00000018931	151.893	0.00224682	0.0619573	0.660525	0.9501	Natd1	N-acetyltransferase domain containing 1	11	10.0817	10.4388	10.2654	10.8989	10.1654	10.1194	10.4584	10.2989	10.1497	10.2385	10.399
ENSMUSG00000018932	159.337	4.01627e-05	0.0619868	0.993782	0.999188	Map2k3	mitogen-activated protein kinase kinase 3	11	10.6984	10.029	10.3347	10.1599	10.4089	10.435	10.7477	9.85843	10.3769	10.2653	10.3527
ENSMUSG00000018965	691.797	-0.00408104	0.0613735	0.710999	0.963116	Ywhah	tyrosine 3-monooxygenase/tryptophan 5-monooxygenase activation protein, eta polypeptide	5	10.904	11.1195	11.1691	10.6239	11.1488	10.9862	11.3147	10.7212	11.1559	11.1102	10.9101
ENSMUSG00000018974	497.735	-0.0121135	0.0631011	0.196816	0.935103	Sart3	squamous cell carcinoma antigen recognized by T cells 3	5	11.0116	10.456	10.8247	10.5812	10.8145	10.7796	10.6583	11.1754	11.0786	10.6913	11.0074
ENSMUSG00000018983	618.557	0.0120122	0.0636733	0.0111448	0.57879	E2f2	E2F transcription factor 2	4	11.3266	10.9739	10.6665	11.2916	11.0604	10.6347	10.319	10.4421	11.2092	10.2325	10.2628
ENSMUSG00000018986	20.9635	-0.00239806	0.062072	0.481265	0.935103	Slfn3	schlafen 3	11	9.94727	10.1701	9.9569	9.94272	9.91106	9.98792	10.0062	9.87821	10.1951	10.0109	9.99857
ENSMUSG00000018995	149.166	-0.00297713	0.0620151	0.569026	0.935103	Nars2	asparaginyl-tRNA synthetase 2 (mitochondrial)(putative)	7	10.6453	10.0371	10.236	10.3503	10.3508	10.3475	10.758	9.94391	10.1082	10.5012	10.5285
ENSMUSG00000018999	390.136	-0.00750388	0.0613149	0.536418	0.935103	Slc35b4	solute carrier family 35, member B4	6	10.6627	10.5838	10.7035	10.906	10.7556	10.6465	10.9893	10.7014	10.7552	10.6406	10.7326
ENSMUSG00000019027	1.89764	0.000814618	0.0621015	0.603746	0.939032	Dnah1	dynein, axonemal, heavy chain 1	14	9.81954	9.92241	9.82565	9.85113	9.82575	9.89559	9.81954	9.81954	9.82711	9.90805	9.78354
ENSMUSG00000019039	100.244	0.00128947	0.0619776	0.761712	0.969546	Dalrd3	DALR anticodon binding domain containing 3	9	10.1314	10.3172	10.1965	10.3339	10.4296	10.2171	9.90477	10.5861	10.1458	10.1473	10.1738
ENSMUSG00000019054	517.346	0.0106663	0.0621725	0.386796	0.935103	Fis1	fission, mitochondrial 1	5	11.1931	10.9459	10.7834	10.8002	11.0396	10.7981	10.6856	10.6955	10.9628	10.9979	10.7782
ENSMUSG00000019055	101.001	0.00112192	0.0620872	0.603452	0.939025	Plod1	procollagen-lysine, 2-oxoglutarate 5-dioxygenase 1	4	10.8331	10.1217	10.2162	10.1369	10.1004	10.0271	9.86485	9.86485	10.5693	10.0069	10.1411
ENSMUSG00000019066	130.839	-0.00303148	0.0620584	0.487236	0.935103	Rab3d	RAB3D, member RAS oncogene family	9	10.0686	10.287	10.5511	9.99876	10.3513	10.1453	10.4882	10.1604	10.1083	10.6977	9.90471
ENSMUSG00000019080	42.3257	0.00200307	0.0621328	0.286981	0.935103	Mfsd3	major facilitator superfamily domain containing 3	15	10.0928	9.92699	9.77025	10.4877	9.77948	9.67609	9.92699	9.92699	10.0598	10.0049	10.0009
ENSMUSG00000019082	117.672	-0.00185611	0.0619705	0.649789	0.948642	Slc25a22	solute carrier family 25 (mitochondrial carrier, glutamate), member 22	7	10.008	10.1193	10.1815	10.4214	10.4208	10.3758	10.3542	10.728	10.2757	10.1022	10.3391
ENSMUSG00000019087	652.775	0.00397802	0.0618096	0.611953	0.939563	Atp6ap1	ATPase, H+ transporting, lysosomal accessory protein 1	X	11.4068	10.8214	11.0611	10.8047	10.6938	11.0818	11.0948	10.4054	10.6862	11.0143	11.1827
ENSMUSG00000019088	39.1062	-0.000201489	0.0620542	0.922972	0.992787	Dnase1l1	deoxyribonuclease 1-like 1	X	9.83968	10.0637	9.8748	10.2049	10.2425	10.0095	9.9163	10.3638	10.0519	9.97491	9.96258
ENSMUSG00000019132	1024.13	-0.00743623	0.0596738	0.682458	0.955451	BC005537	cDNA sequence BC005537	13	11.193	11.2381	11.3439	11.0895	11.2047	11.399	11.4212	11.1902	11.3183	11.3416	11.1271
ENSMUSG00000019139	128.763	0.00146228	0.0619003	0.78237	0.97236	Isyna1	myo-inositol 1-phosphate synthase A1	8	10.0257	10.6423	10.137	10.4831	10.2295	10.262	10.3453	10.1712	10.4943	10.3405	10.1266
ENSMUSG00000019143	224.868	-0.0149566	0.0644516	0.0165919	0.646454	Hars2	histidyl-tRNA synthetase 2	18	10.2619	10.0607	10.5501	10.4276	10.4301	10.4339	10.8436	10.7833	10.5181	10.3201	10.7318
ENSMUSG00000019146	1.75365	0.00047361	0.0621186	0.545374	0.935103	Cacng2	calcium channel, voltage-dependent, gamma subunit 2	15	9.77505	9.98697	9.82803	9.82803	9.82803	9.82803	9.77505	9.77505	9.82803	9.82803	9.82803
ENSMUSG00000019158	115.429	-0.007313	0.0623782	0.266592	0.935103	Tmem160	transmembrane protein 160	7	10.3092	10.0307	10.2628	10.3847	10.1077	10.3991	10.5343	10.3362	10.4423	10.2326	10.2889
ENSMUSG00000019173	748.842	-0.00170215	0.0605681	0.896599	0.989676	Rab5c	RAB5C, member RAS oncogene family	11	11.137	10.8575	11.3549	11.114	11.0011	10.8731	11.272	11.0012	11.0457	11.071	11.0088
ENSMUSG00000019179	1149.66	-0.00642809	0.0607453	0.5921	0.93638	Mdh2	malate dehydrogenase 2, NAD (mitochondrial)	5	11.5915	11.2971	11.2631	11.0436	11.3179	11.3941	11.2253	11.2807	11.362	11.669	11.391
ENSMUSG00000019188	636.919	0.0308578	0.0670127	0.197419	0.935103	H13	histocompatibility 13	2	11.059	10.9796	11.0941	10.9699	10.9366	10.9623	10.9064	10.9196	10.9583	10.8363	11.0056
ENSMUSG00000019189	880.626	-0.00679728	0.0616088	0.535019	0.935103	Rnf145	ring finger protein 145	11	11.1159	11.0053	11.4582	11.1887	10.7823	11.1574	10.9969	11.5173	11.2204	10.9662	11.3386
ENSMUSG00000019210	279.236	-0.00217166	0.0617502	0.75296	0.969546	Atp6v1e1	ATPase, H+ transporting, lysosomal V1 subunit E1	6	10.13	10.7046	10.7323	10.5195	10.5467	10.4777	10.7345	10.6091	10.4227	10.4425	10.6704
ENSMUSG00000019214	11.451	0.00414676	0.0623115	0.00859561	0.51789	Chtf18	CTF18, chromosome transmission fidelity factor 18	17	9.83383	10.1198	9.8724	9.85203	10.114	10.0111	9.83383	9.83383	9.85638	9.86208	9.76925
ENSMUSG00000019254	522.929	-0.00541671	0.0618141	0.525322	0.935103	Ppp1r12c	protein phosphatase 1, regulatory subunit 12C	7	10.7025	10.71	10.7732	10.6938	10.9336	11.1046	11.3726	10.6162	10.7495	10.6808	11.0166
ENSMUSG00000019256	154.974	-0.00644351	0.0621306	0.399942	0.935103	Ahr	aryl-hydrocarbon receptor	12	10.1003	10.5673	10.3945	10.3757	10.4246	10.2387	10.2263	10.6689	10.3604	10.4046	10.5363
ENSMUSG00000019261	177.123	-5.09548e-05	0.0619236	0.929828	0.993831	Map1s	microtubule-associated protein 1S	8	10.1714	10.2365	10.6646	10.3695	10.103	10.664	10.4704	10.5107	10.2638	9.96197	10.4038
ENSMUSG00000019295	148.978	0.00211863	0.0618719	0.73057	0.966598	Tmem129	transmembrane protein 129	5	10.4966	10.1985	10.1621	10.2827	10.1858	10.6379	10.0941	10.4635	10.379	10.3487	10.196
ENSMUSG00000019297	235.122	-0.00652136	0.0623009	0.248777	0.935103	Nop9	NOP9 nucleolar protein	14	10.0567	10.3993	10.7029	10.5099	10.4018	10.4964	10.6394	10.915	10.387	10.5159	10.5042
ENSMUSG00000019301	1.7439	0.00115188	0.0621315	0.185594	0.935103	Hsd17b1	hydroxysteroid (17-beta) dehydrogenase 1	11	9.79087	9.95346	9.81221	9.94735	9.81221	9.81221	9.79087	9.79087	9.81221	9.81221	9.81221
ENSMUSG00000019302	178.14	0.00283639	0.0618418	0.673415	0.953614	Atp6v0a1	ATPase, H+ transporting, lysosomal V0 subunit A1	11	10.2998	10.5396	10.5975	10.3021	10.2804	10.5023	10.4394	10.2756	10.499	9.98287	10.556
ENSMUSG00000019303	19.4013	-0.00174589	0.0621103	0.382566	0.935103	Psmc3ip	proteasome (prosome, macropain) 26S subunit, ATPase 3, interacting protein	11	9.83787	9.95288	9.76521	9.88225	9.9675	10.1274	10.2122	9.83787	9.9694	9.99612	10.0135
ENSMUSG00000019312	1.34053	-0.000960275	0.062127	0.249665	0.935103	Grb7	growth factor receptor bound protein 7	11	9.81902	9.81902	9.78406	9.78406	9.78406	9.78406	9.81902	9.81902	9.85951	9.78406	9.95336
ENSMUSG00000019320	0.997035	0.000149817	0.0621086	0.904272	0.990764	Noxo1	NADPH oxidase organizer 1	17	9.81749	9.81749	9.78559	9.78559	9.78559	9.91497	9.81749	9.81749	9.78559	9.78559	9.87954
ENSMUSG00000019338	376.132	-0.00886242	0.0627178	0.140281	0.935103	Zfp687	zinc finger protein 687	3	10.1678	10.5712	10.5133	10.6013	10.751	10.8122	11.3759	10.5783	10.8585	10.6571	10.5197
ENSMUSG00000019362	294.406	-0.0128999	0.0630725	0.267271	0.935103	D8Ertd738e	DNA segment, Chr 8, ERATO Doi 738, expressed	8	10.6051	10.5603	10.6706	10.4366	10.4538	10.7199	10.8338	10.4798	10.5588	10.8425	10.6559
ENSMUSG00000019368	11.152	-0.000571338	0.06212	0.528155	0.935103	Sec14l4	SEC14-like lipid binding 4	11	9.73506	9.73506	9.86803	9.86803	9.86803	9.86803	9.73506	10.2669	9.86803	9.86803	9.86803
ENSMUSG00000019370	1742.04	-0.00438263	0.0608494	0.762515	0.969546	Calm3	calmodulin 3	7	11.9212	11.2504	11.835	11.6724	11.433	11.8276	12.0717	11.4966	11.6449	11.6216	11.7603
ENSMUSG00000019373	197.514	-0.00316553	0.0616238	0.71135	0.963116	Cops3	COP9 signalosome subunit 3	11	10.2292	10.7062	10.3114	10.324	10.3556	10.56	10.4393	10.3992	10.5564	10.5474	10.4493
ENSMUSG00000019428	599.172	0.0317124	0.0727289	0.0318106	0.771754	Fkbp8	FK506 binding protein 8	8	11.2304	10.9205	10.949	11.2702	10.978	10.9196	10.6568	10.9804	10.8495	10.9158	10.747
ENSMUSG00000019432	926.727	-0.00566078	0.0607244	0.685624	0.956271	Ddx39b	DEAD box helicase 39b	17	11.0089	11.1641	11.2078	11.2734	11.0782	11.2162	11.509	11.0013	11.2595	11.1159	11.0448
ENSMUSG00000019433	88.4192	-0.00304915	0.0619448	0.619839	0.942458	Gipc1	GIPC PDZ domain containing family, member 1	8	10.1075	10.2868	10.1567	9.87906	10.2864	10.2871	10.0838	10.3131	10.3406	10.2842	10.1508
ENSMUSG00000019437	8.03979	-0.00015261	0.0620843	0.932582	0.993986	Tlcd1	TLC domain containing 1	11	9.86082	9.86082	9.74226	9.95581	9.81537	10.0452	9.93744	9.86082	9.93204	9.8799	9.78924
ENSMUSG00000019461	65.0861	-0.00109069	0.0620045	0.762569	0.969546	Plscr3	phospholipid scramblase 3	11	10.1853	10.1309	9.89466	10.3582	9.99469	10.1954	9.85426	10.3599	10.3389	10.0561	10.0901
ENSMUSG00000019464	16.8224	-0.00022513	0.0621114	0.688482	0.957156	Ptger1	prostaglandin E receptor 1 (subtype EP1)	8	10.3697	9.74567	9.85742	9.85742	9.93053	9.85742	9.74567	9.74567	9.85742	10.0127	9.93878
ENSMUSG00000019470	484.837	-0.00740548	0.0613505	0.563511	0.935103	Xab2	XPA binding protein 2	8	10.8133	10.9216	10.6716	10.5882	10.7921	11.0702	10.7607	10.8664	10.9245	10.9493	10.8876
ENSMUSG00000019471	1606.72	-0.0233722	0.0627874	0.263459	0.935103	Cdc37	cell division cycle 37	9	11.698	11.6396	11.7209	11.5317	11.4965	11.508	11.6203	11.6015	11.8088	11.7547	11.6584
ENSMUSG00000019487	35.5855	-0.00144333	0.0620864	0.513375	0.935103	Trip10	thyroid hormone receptor interactor 10	17	10.0406	9.81368	9.93523	9.98044	10.0085	10.2122	9.81368	10.4455	9.96357	10.0939	10.0045
ENSMUSG00000019494	460.571	0.00592181	0.0620459	0.474839	0.935103	Cops6	COP9 signalosome subunit 6	5	11.2933	10.4284	10.5767	11.1807	10.8247	10.5829	10.6046	10.8045	10.6523	10.9539	10.7076
ENSMUSG00000019505	8075.28	0.0260119	0.0602128	0.290526	0.935103	Ubb	ubiquitin B	11	13.4261	13.2819	13.4914	13.4046	13.1236	13.3172	13.217	13.2647	13.2262	13.2385	13.2803
ENSMUSG00000019518	85.2628	0.00755964	0.0623443	0.312269	0.935103	Ap4m1	adaptor-related protein complex AP-4, mu 1	5	10.3502	10.0966	10.1498	10.3602	10.1952	10.3574	10.2768	10.1561	10.1724	10.0627	10.2419
ENSMUSG00000019528	200.724	-2.68186e-05	0.0616827	0.995341	0.999188	Gyg	glycogenin	3	10.2501	10.7558	10.4844	10.2187	10.5114	10.4819	10.6359	10.1733	10.5217	10.4795	10.4789
ENSMUSG00000019539	40.8261	-0.00339089	0.0620901	0.448721	0.935103	Rcn3	reticulocalbin 3, EF-hand calcium binding domain	7	9.97407	10.1825	9.90365	10.0301	10.1268	10.1961	10.1635	10.0995	10.1986	10.1996	10.0793
ENSMUSG00000019564	444.907	0.00857487	0.0626237	0.179604	0.935103	Arid3a	AT rich interactive domain 3A (BRIGHT-like)	10	11.1816	11.1775	10.7148	10.8563	10.8319	10.521	10.3513	10.3468	10.5429	10.9572	10.9261
ENSMUSG00000019578	175.45	0.00154382	0.0619649	0.721508	0.964537	Ubxn6	UBX domain protein 6	17	10.5669	10.2302	10.6287	10.385	10.2897	10.4332	9.95132	10.7328	10.4986	10.1338	10.2232
ENSMUSG00000019579	111.499	0.0105791	0.0632106	0.0699051	0.921091	Mydgf	myeloid derived growth factor	17	10.242	10.3015	10.3002	10.4986	10.2282	10.1145	9.99346	10.2513	10.035	10.0087	10.1943
ENSMUSG00000019590	2.85983	-0.000845155	0.0621173	0.310369	0.935103	Cyb561	cytochrome b-561	11	9.79052	9.79052	9.81256	9.81256	9.90694	9.81256	9.79052	10.0076	9.81256	9.94381	9.81256
ENSMUSG00000019659	293.105	0.00570737	0.0615393	0.599041	0.937567	Ccdc12	coiled-coil domain containing 12	9	10.7977	10.7886	10.6219	10.4392	10.6406	10.7265	10.3521	10.596	10.66	10.6234	10.7237
ENSMUSG00000019689	24.5615	-0.000228906	0.062055	0.917683	0.992013	Fmc1	formation of mitochondrial complex V assembly factor 1	6	9.89392	10.052	10.0678	10.0938	9.99872	10.0016	9.811	10.2471	9.96073	9.79208	10.0924
ENSMUSG00000019699	421.722	0.00496451	0.0611627	0.683415	0.955469	Akt3	thymoma viral proto-oncogene 3	1	10.7297	10.8454	10.6808	10.5842	10.7872	11.0625	10.8928	10.5994	10.7188	10.7271	10.8072
ENSMUSG00000019710	368.087	-0.03465	0.0740844	0.0523636	0.852077	Mrpl24	mitochondrial ribosomal protein L24	3	10.8142	10.6687	10.5631	10.6518	10.6952	10.6187	10.7649	10.6578	10.8956	10.8211	10.8394
ENSMUSG00000019715	299.421	-0.0130787	0.0636688	0.0784293	0.929589	Gle1	GLE1 RNA export mediator (yeast)	2	10.3676	10.2897	10.7382	10.6065	10.4465	10.6059	11.16	10.6241	10.8286	10.4676	10.5791
ENSMUSG00000019726	2571.52	-0.00299627	0.0600631	0.842339	0.980008	Lyst	lysosomal trafficking regulator	13	12.01	11.6052	11.8109	12.1524	12.1506	12.122	12.1259	12.2155	11.9425	11.7572	11.9885
ENSMUSG00000019731	530.303	0.0122888	0.0627905	0.285682	0.935103	Slc35e1	solute carrier family 35, member E1	8	10.7924	10.8722	10.5914	11.0895	11.1508	10.8206	10.7465	10.9142	10.5831	10.6894	10.8944
ENSMUSG00000019732	3.94229	-0.00119743	0.0621212	0.471752	0.935103	Calr3	calreticulin 3	8	9.84789	9.84789	9.75519	9.82278	9.85858	9.83443	9.84789	9.84789	9.95469	9.75519	9.95437
ENSMUSG00000019734	4.64384	3.25579e-05	0.0621103	0.999742	0.999989	Tmc4	transmembrane channel-like gene family 4	7	9.82825	9.82825	9.90114	10.049	9.77483	9.77483	9.92208	9.82825	9.91255	9.77483	9.77483
ENSMUSG00000019737	1.38707	-0.00024402	0.0621123	0.878719	0.98732	Syne4	spectrin repeat containing, nuclear envelope family member 4	7	9.76893	9.87179	9.83415	9.83415	9.83415	9.83415	9.76893	9.92696	9.83415	9.83415	9.83415
ENSMUSG00000019738	44.5758	0.00760068	0.0623231	0.326601	0.935103	Polr2i	polymerase (RNA) II (DNA directed) polypeptide I	7	10.0876	10.253	10.1553	10.1832	10.0598	10.1237	10.1435	9.99309	10.1562	10.0695	10.0875
ENSMUSG00000019761	2.58555	-0.00136451	0.0621354	0.173348	0.935103	Krt10	keratin 10	11	9.80565	9.80565	9.79743	9.79743	9.85713	9.79743	9.80565	9.96369	9.92809	9.94119	9.79743
ENSMUSG00000019763	289.846	0.000856954	0.0616276	0.911822	0.991262	Rmnd1	required for meiotic nuclear division 1 homolog	10	10.2259	10.6213	10.795	10.7403	10.5903	10.6159	10.8983	10.6707	10.3803	10.5863	10.5201
ENSMUSG00000019768	138.863	0.00337031	0.0618534	0.63565	0.945707	Esr1	estrogen receptor 1 (alpha)	10	10.5284	10.3637	10.3086	10.5153	10.2664	10.2986	10.4305	10.0725	10.4647	10.138	10.4497
ENSMUSG00000019773	29.2734	-0.00231175	0.0621347	0.319406	0.935103	Fbxo5	F-box protein 5	10	9.80416	10.0452	10.0369	9.79892	10.0817	9.95061	9.80416	10.3536	9.88605	10.1118	10.1465
ENSMUSG00000019774	107.959	0.00375928	0.062037	0.506621	0.935103	Mtrf1l	mitochondrial translational release factor 1-like	10	10.3745	10.4018	10.2305	10.018	10.569	10.3105	10.3448	10.0189	10.1507	10.3432	10.3729
ENSMUSG00000019777	350.301	-0.0237985	0.0667993	0.124513	0.935103	Hdac2	histone deacetylase 2	10	10.4884	10.6948	10.6059	10.6791	10.5227	10.663	10.8064	10.6521	10.7803	10.5729	10.7991
ENSMUSG00000019779	5.34514	-9.30615e-05	0.0621136	0.69478	0.959335	Frk	fyn-related kinase	10	9.759	9.759	9.84408	9.84408	9.84408	9.88984	10.1255	9.759	9.84408	9.84408	9.84408
ENSMUSG00000019782	490.151	-0.00194823	0.0610499	0.855795	0.983214	Rwdd1	RWD domain containing 1	10	11.2089	10.7566	10.725	10.8503	10.6568	10.9102	10.7848	10.6747	10.9043	10.9985	10.9487
ENSMUSG00000019787	4.00605	-0.000562621	0.0621198	0.539324	0.935103	Trdn	triadin	10	9.76155	9.76155	9.84153	9.84153	9.84153	9.84153	9.76155	10.0815	9.84153	9.84153	9.84153
ENSMUSG00000019789	1.91316	-0.000448047	0.0621105	0.548568	0.935103	Hey2	hairy/enhancer-of-split related with YRPW motif 2	10	9.79541	9.79541	9.80768	9.80768	9.91934	9.80768	9.79541	9.96198	9.80768	9.80768	9.90163
ENSMUSG00000019790	429.741	-0.00973879	0.0628932	0.133405	0.935103	Stxbp5	syntaxin binding protein 5 (tomosyn)	10	10.2644	10.6417	10.6766	10.7053	10.6946	10.7465	10.4772	11.4848	10.6693	10.8361	10.6906
ENSMUSG00000019791	205.082	-0.00156201	0.0617931	0.781703	0.97236	Hint3	histidine triad nucleotide binding protein 3	10	10.1413	10.3893	10.6737	10.3755	10.3496	10.686	10.6578	10.6309	10.4038	10.3576	10.3376
ENSMUSG00000019792	108.853	-0.000801006	0.0619394	0.852314	0.98224	Trmt11	tRNA methyltransferase 11	10	9.9874	10.7319	10.2255	10.0883	10.1818	10.2634	10.1712	10.1572	10.2671	10.5414	10.2661
ENSMUSG00000019794	229.196	-0.00693221	0.0621553	0.383519	0.935103	Katna1	katanin p60 (ATPase-containing) subunit A1	10	10.3942	10.4996	10.5628	10.4735	10.5877	10.3355	10.9396	10.2076	10.5749	10.5901	10.4472
ENSMUSG00000019795	347.221	0.00140412	0.0617925	0.832209	0.977617	Pcmt1	protein-L-isoaspartate (D-aspartate) O-methyltransferase 1	10	10.8287	10.4277	10.549	10.8006	10.6145	10.8614	11.1625	10.1713	10.4503	10.5191	10.7379
ENSMUSG00000019796	5.22724	-0.00131643	0.0621352	0.207593	0.935103	Lrp11	low density lipoprotein receptor-related protein 11	10	9.75733	9.83008	9.84575	9.84575	9.84575	9.84575	10.0992	9.75733	9.95244	9.84575	9.84575
ENSMUSG00000019797	53.3023	-0.00385814	0.0621403	0.42863	0.935103	Mtres1	mitochondrial transcription rescue factor 1	10	9.83409	10.2145	10.1205	10.1062	10.136	10.0393	10.0216	10.3909	10.1809	10.2067	10.0173
ENSMUSG00000019802	500.124	-1.46666e-05	0.0614649	0.996277	0.999188	Sec63	SEC63-like (S. cerevisiae)	10	10.5263	11.2835	10.7564	10.5379	10.875	10.8954	10.8043	10.6851	10.7206	11.089	10.8993
ENSMUSG00000019804	646.796	0.00109199	0.0606269	0.963104	0.997929	Snx3	sorting nexin 3	10	10.8806	11.027	11.0315	11.0578	11.0762	11.0174	11.1707	10.9519	11.2573	10.8226	10.7901
ENSMUSG00000019806	213.44	-0.000127068	0.0618889	0.966786	0.998286	Aig1	androgen-induced 1	10	10.1003	10.3956	10.462	10.8448	10.4119	10.3574	10.6976	10.484	10.292	10.3603	10.2072
ENSMUSG00000019808	57.2253	-0.00085584	0.0620175	0.80809	0.97478	Adat2	adenosine deaminase, tRNA-specific 2	10	9.75086	10.4691	10.0404	10.262	10.0908	9.94372	10.2242	10.0576	10.1861	10.0637	10.2913
ENSMUSG00000019809	103.483	-9.52808e-06	0.061935	0.998319	0.999618	Pex3	peroxisomal biogenesis factor 3	10	10.2144	10.0871	10.4875	10.4517	10.1517	10.1584	10.6258	10.0894	10.1655	10.0507	10.3139
ENSMUSG00000019810	286.918	0.0133298	0.0638254	0.074173	0.924167	Fuca2	fucosidase, alpha-L- 2, plasma	10	10.338	10.9516	10.6778	10.7565	10.4788	10.5356	10.5772	10.257	10.3478	10.4502	10.4698
ENSMUSG00000019813	67.4213	-0.00989298	0.0626097	0.271043	0.935103	Cep57l1	centrosomal protein 57-like 1	10	10.1858	10.1114	10.1109	10.045	10.182	10.1703	10.2711	10.0786	10.1827	10.2207	10.2206
ENSMUSG00000019814	280.07	0.00972923	0.0627287	0.227378	0.935103	Ltv1	LTV1 ribosome biogenesis factor	10	10.2531	11.0453	10.794	10.7211	10.4777	10.5618	10.5589	10.4988	10.6165	10.365	10.5871
ENSMUSG00000019817	7.03766	-0.00056882	0.0621199	0.531963	0.935103	Plagl1	pleiomorphic adenoma gene-like 1	10	9.74862	9.74862	9.85447	9.85447	9.85447	9.85447	9.74862	10.172	9.85447	9.85447	9.85447
ENSMUSG00000019818	2205.31	0.0142905	0.0628978	0.295722	0.935103	Cd164	CD164 antigen	10	12.0131	12.3584	11.7009	11.9525	11.702	11.8799	11.6253	11.4273	11.898	12.0621	11.7969
ENSMUSG00000019820	2444.02	-0.00701508	0.0614441	0.568477	0.935103	Utrn	utrophin	10	12.2507	11.903	11.5925	11.4595	12.0069	12.1341	12.0744	11.5485	11.8984	12.3021	12.2155
ENSMUSG00000019822	27.272	-0.0014186	0.0620854	0.498803	0.935103	Smpd2	sphingomyelin phosphodiesterase 2, neutral	10	9.85349	10.0078	9.93781	10.1396	9.9767	9.9999	9.85349	10.2637	10.1283	9.79111	9.98889
ENSMUSG00000019823	1046.08	0.00835469	0.0617768	0.473691	0.935103	Mical1	microtubule associated monooxygenase, calponin and LIM domain containing 1	10	11.4871	11.5762	11.4346	11.0131	11.2647	11.0999	11.1271	10.8758	11.3066	11.4569	11.2902
ENSMUSG00000019826	260.992	-0.00479242	0.0612425	0.671998	0.953129	Zbtb24	zinc finger and BTB domain containing 24	10	10.4886	10.4437	10.4182	10.6129	10.6147	10.719	10.5935	10.7399	10.4505	10.5678	10.5821
ENSMUSG00000019832	20.8262	-0.00516328	0.0623359	0.157388	0.935103	Rab32	RAB32, member RAS oncogene family	10	9.79775	10.0388	9.9737	9.85313	10.012	9.97022	9.91887	10.2179	9.99511	10.0471	10.102
ENSMUSG00000019837	355.857	-0.0242077	0.0667711	0.137425	0.935103	Gtf3c6	general transcription factor IIIC, polypeptide 6, alpha	10	10.694	10.7427	10.6302	10.6708	10.7917	10.5728	10.6914	10.7727	10.8651	10.7277	10.8179
ENSMUSG00000019838	60.9879	0.00658479	0.0624613	0.209474	0.935103	Slc16a10	solute carrier family 16 (monocarboxylic acid transporters), member 10	10	10.4055	10.0612	10.0592	10.283	10.2041	10.1097	9.90982	10.1668	10.1963	10.0548	10.0441
ENSMUSG00000019841	542.489	-0.0136093	0.0625326	0.33345	0.935103	Rev3l	REV3 like, DNA directed polymerase zeta catalytic subunit	10	10.9207	10.7478	11.0289	10.8514	11.0108	10.7196	10.8605	11.1732	11.0294	10.9296	10.9091
ENSMUSG00000019842	465.476	-0.0164409	0.0632361	0.279599	0.935103	Traf3ip2	TRAF3 interacting protein 2	10	10.7236	10.764	10.7037	10.9614	10.8382	10.6703	10.8813	10.9009	10.9261	10.9496	10.6725
ENSMUSG00000019843	365.759	-0.00136991	0.0615623	0.865081	0.986762	Fyn	Fyn proto-oncogene	10	10.7903	10.532	10.5875	10.6816	10.4913	11.0257	10.9994	10.4497	10.8528	10.4596	10.7516
ENSMUSG00000019845	32.318	0.00467733	0.0623572	0.00826475	0.513271	Tube1	tubulin, epsilon 1	10	9.85559	10.392	9.88712	10.2639	9.97066	10.0921	9.85559	9.85559	9.96075	9.85731	9.896
ENSMUSG00000019846	2.26943	0.000478002	0.0621187	0.538252	0.935103	Lama4	laminin, alpha 4	10	9.77141	10.0124	9.83167	9.83167	9.83167	9.83167	9.77141	9.77141	9.83167	9.83167	9.83167
ENSMUSG00000019849	463.187	-0.00615114	0.0604861	0.732764	0.967379	Prep	prolyl endopeptidase	10	10.8936	10.6881	10.8499	10.8863	10.6423	10.666	10.7159	10.8457	10.8373	10.8984	10.7204
ENSMUSG00000019850	567.555	0.00401221	0.0616075	0.656578	0.94962	Tnfaip3	tumor necrosis factor, alpha-induced protein 3	10	10.7367	10.815	10.878	10.9437	11.4006	10.7013	11.1836	10.809	10.7506	10.6493	10.8792
ENSMUSG00000019854	178.174	-0.00320587	0.062055	0.468637	0.935103	Reps1	RalBP1 associated Eps domain containing protein	10	9.90339	10.4446	10.3224	10.3954	10.3666	10.4749	10.4952	10.6567	10.5604	10.2284	10.277
ENSMUSG00000019857	143.163	-0.000933307	0.0618447	0.879231	0.987432	Asf1a	anti-silencing function 1A histone chaperone	10	10.6476	10.2353	10.4963	10.1439	10.1793	10.2964	10.3237	10.1583	10.2144	10.3636	10.6947
ENSMUSG00000019861	669.414	-0.00527277	0.0607152	0.532477	0.935103	Gopc	golgi associated PDZ and coiled-coil motif containing	10	11.1584	10.6921	11.1035	10.9517	10.9255	10.9456	11.0965	11.0344	11.1583	10.953	10.93
ENSMUSG00000019863	229.68	-0.0135111	0.0634277	0.184568	0.935103	Qrsl1	glutaminyl-tRNA synthase (glutamine-hydrolyzing)-like 1	10	10.503	10.6579	10.5	10.4544	10.4246	10.3119	10.3125	10.6207	10.6707	10.6254	10.6778
ENSMUSG00000019864	198.86	0.00383497	0.0620809	0.460949	0.935103	Rtn4ip1	reticulon 4 interacting protein 1	10	10.3898	10.6903	10.4757	10.3796	10.5064	10.4806	10.617	9.95422	10.246	10.5209	10.2807
ENSMUSG00000019866	544.019	0.0390016	0.074659	0.106621	0.935103	Crybg1	crystallin beta-gamma domain containing 1	10	11.031	10.8257	11.0058	10.9301	11.0127	10.9663	10.9747	10.8519	10.837	10.8231	10.8709
ENSMUSG00000019868	194.715	-0.00803969	0.0623462	0.317211	0.935103	Vta1	vesicle (multivesicular body) trafficking 1	10	10.3486	10.4086	10.6051	10.3226	10.527	10.277	10.3046	10.7714	10.3562	10.44	10.6801
ENSMUSG00000019872	170.703	0.00355306	0.0621056	0.433026	0.935103	Smpdl3a	sphingomyelin phosphodiesterase, acid-like 3A	10	10.4791	10.715	10.111	10.3796	10.4676	10.618	10.4929	9.84206	10.2022	10.5371	10.3604
ENSMUSG00000019873	569.554	-0.0109947	0.0619103	0.413977	0.935103	Reep3	receptor accessory protein 3	10	10.6867	10.8991	10.9311	10.7244	11.0618	11.0034	11.1884	10.9244	10.8937	10.9075	10.9506
ENSMUSG00000019876	885.983	-0.00531668	0.0614553	0.623565	0.943149	Pkib	protein kinase inhibitor beta, cAMP dependent, testis specific	10	11.4027	11.1031	10.9862	11.0605	11.1893	11.3388	11.1215	11.1684	10.8383	11.6004	11.3791
ENSMUSG00000019877	684.309	0.000991927	0.0616149	0.902693	0.990731	Serinc1	serine incorporator 1	10	11.2411	10.6093	11.2738	11.0972	11.0013	10.8682	11.6046	10.5399	10.7594	10.9268	11.0643
ENSMUSG00000019878	78.9586	-0.00273009	0.0621045	0.319115	0.935103	Hsf2	heat shock factor 2	10	10.0088	9.94038	10.1643	10.4748	9.94655	10.2163	10.1964	10.5607	10.2618	9.98326	10.1888
ENSMUSG00000019883	202.334	-0.000382981	0.0618651	0.941179	0.995639	Echdc1	enoyl Coenzyme A hydratase domain containing 1	10	10.0103	10.8348	10.1154	10.5491	10.5942	10.4109	10.6189	10.3129	10.6721	10.4664	10.3018
ENSMUSG00000019891	31.9483	-0.00152705	0.0620926	0.417116	0.935103	Dcbld1	discoidin, CUB and LCCL domain containing 1	10	9.86994	9.97281	10.1111	9.83999	10.0701	10.0837	10.3309	9.86994	9.95078	10.0262	9.99438
ENSMUSG00000019897	340.361	0.0093256	0.0608581	0.560642	0.935103	Ccdc59	coiled-coil domain containing 59	10	10.6501	10.722	10.804	10.6639	10.5249	10.7943	10.6599	10.6806	10.6289	10.6333	10.6981
ENSMUSG00000019906	2.99152	0.000481599	0.0621188	0.531994	0.935103	Lin7a	lin-7 homolog A (C. elegans)	10	9.76696	10.0436	9.83612	9.83612	9.83612	9.83612	9.76696	9.76696	9.83612	9.83612	9.83612
ENSMUSG00000019907	1538.92	0.00246013	0.0596573	0.881588	0.987779	Ppp1r12a	protein phosphatase 1, regulatory subunit 12A	10	11.4625	11.4382	11.6496	11.8268	11.7158	11.4322	11.6837	11.7503	11.4587	11.5328	11.4697
ENSMUSG00000019916	94.9581	-0.000121845	0.061791	0.942838	0.995639	P4ha1	procollagen-proline, 2-oxoglutarate 4-dioxygenase (proline 4-hydroxylase), alpha 1 polypeptide	10	10.3063	10.1974	10.1875	10.0286	10.566	10.1822	10.3317	10.211	10.2555	10.3167	10.2948
ENSMUSG00000019917	27.1449	0.00344894	0.0620746	0.445595	0.935103	Septin10	septin 10	10	10.0418	10.0504	10.1397	10.1512	10.0514	9.92537	9.92327	10.1217	9.90339	9.99556	10.0735
ENSMUSG00000019920	396.186	0.0155962	0.0637882	0.195725	0.935103	Lims1	LIM and senescent cell antigen-like domains 1	10	10.6147	10.7564	10.7316	10.6624	10.7856	10.836	10.4882	10.8075	10.3961	10.6258	10.6294
ENSMUSG00000019923	386.52	0.00613828	0.0618085	0.522477	0.935103	Zwint	ZW10 interactor	10	11.153	10.4744	10.5432	10.7014	10.7352	10.8343	10.5193	10.7108	10.7438	10.646	10.7968
ENSMUSG00000019927	309.49	-0.00237761	0.0615829	0.77572	0.971024	Ube2d1	ubiquitin-conjugating enzyme E2D 1	10	10.9043	10.5371	10.5132	10.5111	10.6019	10.5131	10.4146	10.5758	10.9917	10.6978	10.4269
ENSMUSG00000019932	10.2858	-0.000572155	0.06212	0.528713	0.935103	Kera	keratocan	10	9.73766	9.73766	9.86542	9.86542	9.86542	9.86542	9.73766	10.2487	9.86542	9.86542	9.86542
ENSMUSG00000019942	17.8119	-0.00227676	0.0621534	0.313691	0.935103	Cdk1	cyclin-dependent kinase 1	10	9.90312	9.90312	9.69996	9.99792	9.74218	9.81202	9.90312	9.90312	9.92191	9.96864	10.1792
ENSMUSG00000019943	885.854	-0.00649276	0.0608242	0.649204	0.948441	Atp2b1	ATPase, Ca++ transporting, plasma membrane 1	10	11.2519	11.1604	11.0885	11.0531	11.1932	11.2472	10.8918	11.4224	11.0876	11.4241	11.1778
ENSMUSG00000019944	71.4436	0.0042504	0.0622876	0.0699637	0.921091	Rhobtb1	Rho-related BTB domain containing 1	10	9.9793	10.2413	9.94661	10.6253	9.93055	9.83821	9.9793	9.9793	9.7808	10.1075	10.0846
ENSMUSG00000019945	1.30573	0.00075111	0.0621226	0.319866	0.935103	Cabcoco1	ciliary associated calcium binding coiled-coil 1	10	9.81461	9.81461	9.78848	9.78848	9.78848	9.97138	9.81461	9.81461	9.78848	9.78848	9.78848
ENSMUSG00000019947	667.092	0.00241551	0.061201	0.825819	0.976392	Arid5b	AT rich interactive domain 5B (MRF1-like)	10	10.6823	11.2867	11.1143	11.1013	10.7874	10.8653	10.9938	10.9039	10.7102	11.1372	11.051
ENSMUSG00000019948	105.932	-0.00796867	0.0627407	0.0319779	0.771754	Actr6	ARP6 actin-related protein 6	10	9.94704	9.95915	10.113	9.9972	10.2598	10.4582	10.5373	10.5769	10.1585	10.3222	10.4769
ENSMUSG00000019951	590.095	0.00783018	0.0619165	0.458423	0.935103	Uhrf1bp1l	UHRF1 (ICBP90) binding protein 1-like	10	11.2016	10.6025	10.8191	11.0712	10.9202	11.1701	11.1507	10.7535	10.738	10.9112	10.8597
ENSMUSG00000019952	140.527	-0.00284811	0.061736	0.700152	0.959822	Poc1b	POC1 centriolar protein B	10	10.287	10.2935	10.3387	10.66	10.0913	10.1739	10.3194	10.4304	10.3709	10.3011	10.392
ENSMUSG00000019960	501.605	0.0352236	0.0756437	0.0233752	0.723456	Dusp6	dual specificity phosphatase 6	10	10.7077	11.1285	11.0527	10.9202	10.8204	10.7738	10.69	10.7288	10.6451	10.7827	10.7012
ENSMUSG00000019961	742.425	-0.00371131	0.0610139	0.757533	0.969546	Tmpo	thymopoietin	10	10.9059	11.1392	10.9329	11.0496	11.0435	11.2391	10.7956	11.4098	10.9061	11.2162	11.0511
ENSMUSG00000019966	2.67456	-0.000961514	0.0620685	0.788134	0.972976	Kitl	kit ligand	10	9.84212	9.84212	9.82052	9.88738	9.84539	9.86326	9.84212	9.89482	9.88416	9.84399	9.84233
ENSMUSG00000019969	731.156	-0.014227	0.0637376	0.139874	0.935103	Psen1	presenilin 1	12	10.4861	11.0546	10.7805	11.0204	10.9904	11.2556	11.5581	11.0825	11.0689	11.1184	11.0829
ENSMUSG00000019970	30.0344	-0.00144412	0.0620716	0.612224	0.939742	Sgk1	serum/glucocorticoid regulated kinase 1	10	10.0863	10.0302	9.85941	9.76525	10.1347	10.0156	10.0799	9.83783	10.3045	9.92597	10.0544
ENSMUSG00000019971	19.6045	-0.00118835	0.0621253	0.146169	0.935103	Cep290	centrosomal protein 290	10	9.871	10.0633	9.77419	9.73208	9.82646	9.8693	9.871	9.871	10.0688	10.275	9.88783
ENSMUSG00000019975	51.5766	0.00259854	0.0620708	0.457384	0.935103	Ikbip	IKBKB interacting protein	10	10.3449	10.1848	9.89638	10.163	10.1671	10.0626	9.98618	9.92428	10.2901	10.1066	10.0846
ENSMUSG00000019977	438.59	-0.0037146	0.0621634	0.144134	0.935103	Hbs1l	Hbs1-like (S. cerevisiae)	10	10.0994	10.0774	10.8656	10.8863	10.7488	10.5994	10.9567	11.5982	10.4272	10.4674	10.7858
ENSMUSG00000019978	993.955	0.0156963	0.0636513	0.259729	0.935103	Epb41l2	erythrocyte membrane protein band 4.1 like 2	10	11.788	10.9902	11.4889	11.2568	11.2902	11.1698	11.1596	11.1349	11.0831	11.3828	11.2055
ENSMUSG00000019979	262.521	-0.00457017	0.0614416	0.853905	0.982578	Apaf1	apoptotic peptidase activating factor 1	10	10.4339	10.8158	10.4677	10.4462	10.6314	10.4801	10.4571	10.5237	10.7563	10.5387	10.583
ENSMUSG00000019982	8.05227	-0.00015557	0.0620742	0.936286	0.994605	Myb	myeloblastosis oncogene	10	9.83532	9.96129	9.76776	9.89418	9.94676	9.98219	9.83532	9.96437	9.96247	9.76776	9.97239
ENSMUSG00000019984	328.836	0.00350314	0.0619853	0.555768	0.935103	Med23	mediator complex subunit 23	10	10.0713	11.1249	10.6009	10.5562	10.5571	10.7256	10.6719	10.4922	10.5445	10.6546	10.4915
ENSMUSG00000019986	100.328	0.00759198	0.062528	0.200537	0.935103	Ahi1	Abelson helper integration site 1	10	10.137	10.5383	10.1331	10.4348	10.343	10.301	9.98042	10.3744	10.2469	10.1971	10.1467
ENSMUSG00000019988	126.989	0.000169611	0.0619602	0.782189	0.97236	Nedd1	neural precursor cell expressed, developmentally down-regulated gene 1	10	10.2033	10.5154	10.0771	10.507	10.2071	10.1253	9.86215	10.5469	10.3151	10.3169	10.425
ENSMUSG00000019990	4.13049	0.000653954	0.0621164	0.563056	0.935103	Pde7b	phosphodiesterase 7B	10	9.84323	9.84323	9.99408	9.75985	9.94851	9.8056	9.84323	9.84323	9.75985	9.75985	9.8749
ENSMUSG00000019992	2.63568	-0.00141047	0.06214	0.0992481	0.935103	Mtfr2	mitochondrial fission regulator 2	10	9.80087	9.80087	9.80221	9.80221	9.80221	9.80221	9.80087	9.96744	9.94666	9.93986	9.80221
ENSMUSG00000019996	368.655	0.00833542	0.06219	0.382328	0.935103	Map7	microtubule-associated protein 7	10	10.9888	10.5774	10.8958	10.6618	10.6139	10.7762	10.5025	10.7321	10.5276	10.9516	10.4745
ENSMUSG00000019998	664.978	-0.011654	0.062852	0.254382	0.935103	Stx7	syntaxin 7	10	10.8241	10.9274	10.637	10.8441	11.2371	11.0897	11.2849	10.967	11.0053	11.3861	10.8066
ENSMUSG00000020003	261.096	0.00784191	0.062671	0.0735182	0.924167	Pex7	peroxisomal biogenesis factor 7	10	11.424	10.3923	10.4701	10.6127	10.4307	10.4766	10.1626	9.99576	10.408	10.6082	10.4492
ENSMUSG00000020009	824.947	-0.00474294	0.0609538	0.711886	0.963116	Ifngr1	interferon gamma receptor 1	10	11.3459	11.0363	11.0047	11.251	11.0929	10.9108	11.1821	10.9368	11.4754	11.0278	11.1145
ENSMUSG00000020014	3.08946	-0.000560214	0.0621198	0.544099	0.935103	Cfap54	cilia and flagella associated protein 54	10	9.7664	9.7664	9.83668	9.83668	9.83668	9.83668	10.0475	9.7664	9.83668	9.83668	9.83668
ENSMUSG00000020015	641.915	0.00123536	0.0605942	0.930167	0.993831	Cdk17	cyclin-dependent kinase 17	10	10.8773	11.0575	11.0789	10.9564	10.9362	11.0617	10.8285	11.1742	10.7193	10.9647	11.1734
ENSMUSG00000020018	1213.36	-0.0077114	0.0595045	0.677326	0.953618	Snrpf	small nuclear ribonucleoprotein polypeptide F	10	11.4829	11.3077	11.4822	11.4097	11.3269	11.5127	11.6962	11.2624	11.5213	11.4076	11.4006
ENSMUSG00000020022	211.896	0.00959598	0.0621916	0.385851	0.935103	Ndufa12	NADH:ubiquinone oxidoreductase subunit A12	10	10.3064	10.7563	10.5271	10.591	10.4651	10.507	10.5287	10.403	10.4077	10.5502	10.4422
ENSMUSG00000020023	381.242	-0.00210576	0.0615711	0.800329	0.974277	Tmcc3	transmembrane and coiled coil domains 3	10	10.3721	10.8642	11.0907	10.5165	10.748	10.4719	10.7458	10.8558	10.8102	10.611	10.718
ENSMUSG00000020024	96.8142	0.00270029	0.0619589	0.599694	0.938075	Cep83	centrosomal protein 83	10	10.4394	10.4392	10.4869	10.1818	10.1261	10.0884	10.161	10.0168	10.3307	10.2997	10.3351
ENSMUSG00000020027	2.06075	0.000226099	0.0621161	0.41089	0.935103	Socs2	suppressor of cytokine signaling 2	10	9.79966	9.79966	9.87636	9.85122	9.80342	9.94064	9.96212	9.79966	9.80342	9.80342	9.80342
ENSMUSG00000020029	262.739	0.00634203	0.06174	0.530248	0.935103	Nudt4	nudix (nucleoside diphosphate linked moiety X)-type motif 4	10	10.7396	10.4081	10.7123	10.5228	10.6494	10.56	10.3469	10.7905	10.5496	10.4522	10.5527
ENSMUSG00000020034	393.733	-0.00597762	0.0617653	0.529074	0.935103	Tcp11l2	t-complex 11 (mouse) like 2	10	10.553	10.7203	10.7849	10.7915	10.6266	10.5414	11.0582	10.4399	10.6197	10.7388	10.7471
ENSMUSG00000020038	169.017	0.0101519	0.0625552	0.161397	0.935103	Cry1	cryptochrome 1 (photolyase-like)	10	10.6711	10.2743	10.4124	10.4377	10.3982	10.4645	10.248	10.3967	10.3777	10.2834	10.4087
ENSMUSG00000020048	4430.44	-0.00916139	0.0600439	0.615808	0.941178	Hsp90b1	heat shock protein 90, beta (Grp94), member 1	10	12.5578	12.4852	12.9216	12.4657	12.6594	12.2406	12.84	12.4896	12.6649	12.6395	12.5603
ENSMUSG00000020056	121.16	-0.00688198	0.0623254	0.301045	0.935103	Washc3	WASH complex subunit 3	10	9.96524	10.4906	10.3762	10.1801	10.3695	10.2284	10.3593	10.4822	10.2231	10.509	10.3841
ENSMUSG00000020063	211.829	0.0143256	0.0641851	0.0525082	0.852077	Sirt1	sirtuin 1	10	10.1683	10.8704	10.664	10.5563	10.5261	10.388	10.4325	10.3117	10.3627	10.3107	10.3122
ENSMUSG00000020064	920.433	0.0019117	0.0609504	0.874992	0.98732	Herc4	hect domain and RLD 4	10	11.4433	10.7732	11.1798	11.402	11.2512	11.2946	11.4629	11.2287	10.9564	11.2562	11.2488
ENSMUSG00000020067	0.694668	0.000713558	0.0621216	0.435391	0.935103	Mypn	myopalladin	10	9.81107	9.81107	9.79201	9.79201	9.92546	9.79201	9.81107	9.81107	9.79201	9.79201	9.79201
ENSMUSG00000020069	216.996	0.0143675	0.0642765	0.0310896	0.767621	Hnrnph3	heterogeneous nuclear ribonucleoprotein H3	10	10.8112	10.5164	10.6302	10.7195	10.3218	10.5157	10.0389	10.4807	10.2399	10.3655	10.4399
ENSMUSG00000020070	280.757	-0.00221967	0.0617594	0.748578	0.969261	Rufy2	RUN and FYVE domain-containing 2	10	10.2429	10.7762	10.4803	10.6879	10.5346	10.5818	10.3312	10.9057	10.7721	10.2784	10.6128
ENSMUSG00000020072	2.09949	0.000657393	0.0621188	0.48798	0.935103	Pbld2	phenazine biosynthesis-like protein domain containing 2	10	9.82484	9.82484	9.77824	9.99706	9.77824	9.824	9.82484	9.82484	9.83985	9.77824	9.77824
ENSMUSG00000020074	851.007	0.00839487	0.0618409	0.449892	0.935103	Ccar1	cell division cycle and apoptosis regulator 1	10	11.2266	11.2656	11.4311	11.0391	11.2824	11.14	10.6889	11.5215	11.1006	11.2242	11.0122
ENSMUSG00000020075	1924.83	-0.0025768	0.060073	0.862858	0.986184	Ddx21	DExD box helicase 21	10	11.3974	11.7776	11.8986	11.8668	11.7839	11.8266	12.1451	11.7715	11.6487	11.7262	11.6592
ENSMUSG00000020076	504.12	-0.00379241	0.0612397	0.725782	0.965982	Ddx50	DExD box helicase 50	10	10.4487	10.9422	10.8922	10.8434	10.9233	10.799	10.9786	10.9486	10.7335	10.8469	10.7686
ENSMUSG00000020077	2499.98	-0.00205726	0.0589997	0.910065	0.991262	Srgn	serglycin	10	12.3012	11.8339	12.0835	12.0432	11.9664	11.8337	11.9018	12.0305	12.2442	11.9315	12.0154
ENSMUSG00000020078	337.203	-0.0124468	0.0634663	0.118914	0.935103	Vps26a	VPS26 retromer complex component A	10	10.4622	10.7916	10.5654	10.2566	10.5554	10.7011	10.8472	10.4896	11.1811	10.6628	10.6114
ENSMUSG00000020079	170.159	-4.68147e-05	0.0615293	0.99136	0.999188	Supv3l1	suppressor of var1, 3-like 1 (S. cerevisiae)	10	10.6114	10.3418	10.4497	10.2106	10.5791	10.2699	10.4575	10.2516	10.4296	10.5308	10.4392
ENSMUSG00000020083	2.88108	0.000218431	0.062109	0.855915	0.983214	Fam241b	family with sequence similarity 241, member B	10	9.83453	9.83453	9.96141	9.76855	9.88792	9.76855	9.83453	9.83453	9.76855	9.91818	9.76855
ENSMUSG00000020085	2.20646	0.000558113	0.0621167	0.173886	0.935103	Aifm2	apoptosis-inducing factor, mitochondrion-associated 2	10	9.82304	9.82304	9.8396	9.91518	9.89941	9.90107	9.89966	9.82304	9.78004	9.78004	9.78004
ENSMUSG00000020087	151.218	-9.92866e-05	0.0619505	0.974359	0.998814	Tysnd1	trypsin domain containing 1	10	9.90603	10.3989	10.4694	10.6134	10.3352	10.2928	10.8041	10.3241	10.0721	10.3181	10.4069
ENSMUSG00000020088	490.334	0.0146286	0.0638692	0.142403	0.935103	Sar1a	secretion associated Ras related GTPase 1A	10	10.6377	11.1268	10.8889	10.8149	11.0219	10.8349	10.9518	10.4827	10.6751	10.52	10.8425
ENSMUSG00000020089	231.462	-0.000661497	0.061518	0.935423	0.994502	Ppa1	pyrophosphatase (inorganic) 1	10	10.7848	10.2812	10.6254	10.4157	10.543	10.4303	10.2839	10.724	10.6192	10.5445	10.4512
ENSMUSG00000020091	1052.41	-0.0187559	0.0646733	0.164137	0.935103	Eif4ebp2	eukaryotic translation initiation factor 4E binding protein 2	10	11.0953	11.0647	11.0281	11.1413	11.2483	11.5172	11.2348	11.6464	11.4882	11.1824	11.2167
ENSMUSG00000020092	1.3724	0.00227758	0.0621444	0.318414	0.935103	Pald1	phosphatase domain containing, paladin 1	10	9.87186	9.88596	9.8628	9.83766	9.86298	9.86911	9.81322	9.81322	9.85147	9.84857	9.78986
ENSMUSG00000020097	1036.56	0.00786406	0.0623286	0.323868	0.935103	Sgpl1	sphingosine phosphate lyase 1	10	11.7802	10.6349	11.2339	11.5535	11.4719	11.0833	11.039	11.389	11.4286	10.9496	10.7546
ENSMUSG00000020100	845.94	-0.00531875	0.060762	0.702252	0.960204	Slc29a3	solute carrier family 29 (nucleoside transporters), member 3	10	11.3345	10.8739	10.9773	11.021	11.0338	11.1323	10.9172	11.2249	11.1127	11.114	11.2222
ENSMUSG00000020101	51.2062	-0.00239434	0.062131	0.152096	0.935103	Vsir	V-set immunoregulatory receptor	10	9.86028	9.86028	10.1066	9.95095	9.94944	10.3421	10.3212	10.2705	10.1593	9.92365	10.1147
ENSMUSG00000020102	190.948	-0.0030946	0.0619669	0.570194	0.935103	Slc16a7	solute carrier family 16 (monocarboxylic acid transporters), member 7	10	10.3528	10.5407	10.0682	10.2339	10.1733	10.3188	10.1731	10.304	10.8241	10.3131	10.4672
ENSMUSG00000020105	9.11459	-0.000362592	0.0621088	0.615527	0.941178	Lrig3	leucine-rich repeats and immunoglobulin-like domains 3	10	9.8319	9.8319	9.77118	9.77118	9.77118	10.1334	10.0031	9.8319	9.89437	9.77118	10.0105
ENSMUSG00000020107	252.379	-0.00589618	0.0619747	0.470158	0.935103	Anapc16	anaphase promoting complex subunit 16	10	10.2767	10.7855	10.328	10.7655	10.4552	10.4929	10.4393	10.7467	10.592	10.7464	10.5544
ENSMUSG00000020108	280.652	0.0167203	0.0643782	0.145795	0.935103	Ddit4	DNA-damage-inducible transcript 4	10	10.6794	10.5414	10.5586	10.6481	10.6262	10.6674	10.6779	10.3287	10.3589	10.4622	10.5765
ENSMUSG00000020109	314.619	0.00116198	0.0618165	0.852518	0.98235	Dnajb12	DnaJ heat shock protein family (Hsp40) member B12	10	11.0679	10.003	10.8254	10.6832	10.5574	10.446	10.8122	10.5702	10.6474	10.4492	10.6846
ENSMUSG00000020111	335.871	0.705256	0.362776	0.00123781	0.176726	Micu1	mitochondrial calcium uptake 1	10	10.8431	10.608	10.5586	10.8097	10.9244	10.6298	10.428	10.573	10.3882	10.4632	10.5173
ENSMUSG00000020114	1174.86	5.08779e-05	0.0615185	0.997931	0.999508	Cand1	cullin associated and neddylation disassociated 1	10	12.0308	10.8094	11.2388	10.9415	11.1189	11.7531	11.0931	11.4413	11.5599	11.3799	11.4137
ENSMUSG00000020115	566.967	0.00846453	0.062631	0.178537	0.935103	Tbk1	TANK-binding kinase 1	10	10.3955	11.2511	11.3838	11.1359	10.8105	10.9431	10.6881	11.2592	10.8065	10.4034	10.806
ENSMUSG00000020116	141.27	0.0108376	0.0629649	0.18697	0.935103	Pno1	partner of NOB1 homolog	11	10.441	10.4316	10.2049	10.3712	10.2392	10.6213	10.3469	10.139	10.3635	10.2697	10.3077
ENSMUSG00000020120	1513.92	-0.00277515	0.0571793	0.914201	0.991262	Plek	pleckstrin	11	11.5559	11.5556	11.5174	11.4496	11.7554	11.5501	11.5506	11.6131	11.4855	11.6633	11.5605
ENSMUSG00000020121	9.07771	0.000492077	0.062119	0.5173	0.935103	Srgap1	SLIT-ROBO Rho GTPase activating protein 1	10	9.74149	10.2219	9.86159	9.86159	9.86159	9.86159	9.74149	9.74149	9.86159	9.86159	9.86159
ENSMUSG00000020124	745.835	0.00755646	0.0616441	0.517656	0.935103	Usp15	ubiquitin specific peptidase 15	10	11.3212	10.8872	10.9958	11.4511	10.7992	11.0401	11.1177	10.8871	10.9624	11.149	10.9757
ENSMUSG00000020128	588.515	-0.00737714	0.0620678	0.402928	0.935103	Vps54	VPS54 GARP complex subunit	11	10.8628	10.9216	11.2988	10.5196	10.8036	10.6273	11.1526	10.686	10.9492	11.2363	10.9055
ENSMUSG00000020130	474.195	0.00832619	0.0621851	0.39792	0.935103	Tbc1d15	TBC1 domain family, member 15	10	10.6019	11.2674	10.9033	10.9133	10.6776	10.7068	10.8213	10.5155	10.6706	10.9164	10.8225
ENSMUSG00000020132	1198.42	0.0184005	0.0638324	0.239127	0.935103	Rab21	RAB21, member RAS oncogene family	10	11.338	11.2524	11.3634	11.631	11.2241	11.3981	11.1352	11.4776	11.2832	11.0416	11.1642
ENSMUSG00000020133	133.849	-0.0142423	0.0640251	0.0783695	0.929589	2310011J03Rik	RIKEN cDNA 2310011J03 gene	10	10.3696	10.0834	10.3367	10.3352	10.2371	10.2636	10.2281	10.6765	10.3828	10.3713	10.4492
ENSMUSG00000020134	529.923	0.00669573	0.0615469	0.553523	0.935103	Peli1	pellino 1	11	11.001	11.119	10.9737	10.69	10.8575	10.8584	10.4923	10.9069	10.9415	10.9554	10.8821
ENSMUSG00000020137	137.6	0.00293071	0.0618641	0.65538	0.949292	Thap2	THAP domain containing, apoptosis associated protein 2	10	10.6059	10.2927	10.3145	10.32	10.2542	10.4542	10.4031	10.0648	10.5833	10.292	10.1733
ENSMUSG00000020143	6007.11	-0.00274897	0.0585262	0.887095	0.988206	Dock2	dedicator of cyto-kinesis 2	11	12.6673	13.0023	12.6426	13.1845	13.0486	12.7919	13.0082	12.9374	12.771	12.9634	12.9246
ENSMUSG00000020149	566.493	0.00385595	0.0609729	0.759886	0.969546	Rab1a	RAB1A, member RAS oncogene family	11	11.1494	10.9897	11.0919	10.7416	10.871	10.8449	10.6815	10.8928	10.8456	11.1077	10.9958
ENSMUSG00000020150	4.26134	0.000896262	0.0621207	0.328391	0.935103	Gamt	guanidinoacetate methyltransferase	10	9.80974	9.98027	9.79334	9.79334	10.0498	9.79334	9.80974	9.80974	9.79334	9.90316	9.84032
ENSMUSG00000020152	4591.1	0.0907614	0.109337	0.0396648	0.805561	Actr2	ARP2 actin-related protein 2	11	12.7327	12.7175	12.8057	12.6236	12.6238	12.5669	12.5442	12.4239	12.4845	12.5891	12.5384
ENSMUSG00000020153	209.427	-0.0154476	0.0636441	0.212157	0.935103	Ndufs7	NADH:ubiquinone oxidoreductase core subunit S7	10	10.4287	10.6327	10.3582	10.4277	10.4557	10.4126	10.5275	10.3778	10.6175	10.5487	10.6214
ENSMUSG00000020154	1.38087	-6.76826e-05	0.0621133	0.719456	0.963737	Ptprb	protein tyrosine phosphatase, receptor type, B	10	9.782	9.782	9.82108	9.82108	9.82108	9.86683	9.782	9.96445	9.82108	9.82108	9.82108
ENSMUSG00000020156	160.716	0.00213508	0.0620715	0.553519	0.935103	Pwwp3a	PWWP domain containing 3A, DNA repair factor	10	9.96644	10.7504	10.2058	10.0464	10.5988	10.3107	10.4179	10.0191	10.5026	10.1717	10.1833
ENSMUSG00000020163	189.456	-0.00418917	0.0615497	0.632838	0.945707	Uqcr11	ubiquinol-cytochrome c reductase, complex III subunit XI	10	10.1811	10.5339	10.4345	10.5272	10.4779	10.5008	10.6002	10.5598	10.4962	10.3074	10.5372
ENSMUSG00000020166	820.411	0.0190277	0.0655533	0.0766558	0.925479	Cnot2	CCR4-NOT transcription complex, subunit 2	10	11.8248	10.9944	11.2203	11.2897	11.089	11.0819	11.062	10.6262	11.2038	10.9731	11.03
ENSMUSG00000020167	1198.45	0.000314783	0.0598207	0.981572	0.999188	Tcf3	transcription factor 3	10	11.5336	11.3883	11.3975	11.0962	11.399	11.5423	11.3158	11.3307	11.4078	11.2843	11.6177
ENSMUSG00000020169	1.10986	-0.000960373	0.0621269	0.285615	0.935103	Best3	bestrophin 3	10	9.81359	9.81359	9.78949	9.78949	9.78949	9.78949	9.81359	9.81359	9.95814	9.78949	9.78949
ENSMUSG00000020170	245.612	0.00196423	0.0615603	0.824646	0.976392	Frs2	fibroblast growth factor receptor substrate 2	10	10.7871	10.3065	10.4281	10.5833	10.6132	10.3811	10.561	10.3906	10.5636	10.3218	10.6881
ENSMUSG00000020171	534.977	-0.00509501	0.0617711	0.540775	0.935103	Yeats4	YEATS domain containing 4	10	10.3919	10.8481	11.0505	10.9057	10.6778	11.075	11.2035	11.0687	10.8144	10.7967	10.8262
ENSMUSG00000020175	1.19099	-0.000545708	0.0621194	0.572078	0.935103	Rab36	RAB36, member RAS oncogene family	10	9.7797	9.7797	9.82338	9.82338	9.82338	9.82338	9.7797	9.9544	9.82338	9.82338	9.82338
ENSMUSG00000020176	1.10368	0.000541798	0.0621146	0.62719	0.944272	Grb10	growth factor receptor bound protein 10	11	9.82555	9.82555	9.91066	9.82532	9.77753	9.84223	9.82555	9.82555	9.82109	9.77753	9.82451
ENSMUSG00000020178	7.82775	-0.000898657	0.0621067	0.642174	0.94755	Adora2a	adenosine A2a receptor	10	9.86833	9.86833	9.93657	9.80234	9.8869	9.73475	9.86833	9.86833	9.99941	9.98355	9.73475
ENSMUSG00000020180	373.472	-0.0139064	0.063692	0.138221	0.935103	Snrpd3	small nuclear ribonucleoprotein D3	10	10.533	10.6255	10.6957	10.6866	10.6763	10.6188	11.1713	10.495	10.7719	11.0074	10.4867
ENSMUSG00000020181	2.40637	0.00114748	0.0621169	0.367927	0.935103	Nav3	neuron navigator 3	10	9.99623	9.78498	9.86022	9.81811	9.86032	9.89735	9.78498	9.83768	9.81811	9.81811	9.88454
ENSMUSG00000020183	308.671	-0.00722323	0.0624031	0.24941	0.935103	Cpm	carboxypeptidase M	10	10.8849	10.2574	10.4172	10.6679	10.3808	10.3913	10.9594	10.2234	10.4962	10.8409	10.8747
ENSMUSG00000020184	487.874	0.595034	0.494793	0.00318336	0.318283	Mdm2	transformed mouse 3T3 cell double minute 2	10	11.1732	11.0953	10.9086	10.9499	10.8822	10.8399	10.5182	10.5167	10.5265	10.8692	10.8044
ENSMUSG00000020185	10.9823	0.000309766	0.0621041	0.852969	0.982428	E2f7	E2F transcription factor 7	10	9.87584	9.87584	9.72724	9.72724	10.01	10.0565	9.87584	9.87584	9.72724	9.96185	9.92082
ENSMUSG00000020189	717.067	-0.00351696	0.0604038	0.806497	0.97478	Osbpl8	oxysterol binding protein-like 8	10	10.8562	11.3223	10.9433	11.0547	10.9111	10.9813	10.9637	10.9744	11.1721	11.0672	11.0742
ENSMUSG00000020190	2130.94	0.00983034	0.0611422	0.531545	0.935103	Mknk2	MAP kinase-interacting serine/threonine kinase 2	10	12.2097	11.8982	11.9908	11.5671	11.7765	11.8125	11.7301	11.5091	11.8729	11.8229	12.0149
ENSMUSG00000020193	29.4998	-0.00136147	0.0621068	0.283204	0.935103	Zpbp	zona pellucida binding protein	11	9.85943	9.85943	9.74365	10.1219	10.0832	10.014	9.91361	10.3374	9.98595	9.98545	10.0132
ENSMUSG00000020196	726.878	0.00320191	0.0614383	0.752302	0.969546	Cabin1	calcineurin binding protein 1	10	10.8303	10.9145	11.5956	10.9274	10.7272	11.0072	11.1939	10.9832	10.8293	10.8946	10.8819
ENSMUSG00000020198	769.393	-0.0194166	0.0657319	0.0650538	0.90656	Ap3d1	adaptor-related protein complex 3, delta 1 subunit	10	10.8002	10.8693	10.8165	11.3539	11.0548	10.7744	11.1387	11.4666	11.3045	10.8211	11.3558
ENSMUSG00000020205	17.2017	0.000664283	0.0620612	0.877114	0.98732	Phlda1	pleckstrin homology like domain, family A, member 1	10	9.93579	9.95573	9.75022	10.016	10.0872	10.0532	10.0694	9.85286	9.93494	9.98845	9.84417
ENSMUSG00000020211	389.259	-0.0114255	0.0629713	0.195079	0.935103	Sf3a2	splicing factor 3a, subunit 2	10	10.3842	10.6363	10.4969	10.9276	10.6195	10.7652	11.1313	10.694	10.692	10.713	10.7657
ENSMUSG00000020219	133.92	-0.00737513	0.0623667	0.255142	0.935103	Timm13	translocase of inner mitochondrial membrane 13	10	10.1473	10.2153	10.4967	10.1407	10.3647	10.2557	10.5566	10.3057	10.3922	10.2729	10.2205
ENSMUSG00000020220	2032.02	-0.00947404	0.0622172	0.366133	0.935103	Vps13d	vacuolar protein sorting 13D	4	11.7106	11.3619	11.3818	12.2876	11.821	11.726	11.7369	12.4388	11.8946	11.6142	11.9591
ENSMUSG00000020224	333.659	-0.00981305	0.0624106	0.331085	0.935103	Llph	LLP homolog, long-term synaptic facilitation (Aplysia)	10	10.5707	10.709	10.7729	10.7439	10.5742	10.444	10.9955	10.4416	10.8666	10.6716	10.6811
ENSMUSG00000020225	244.345	0.00484082	0.0619216	0.534046	0.935103	Tmbim4	transmembrane BAX inhibitor motif containing 4	10	10.7316	10.2745	10.4144	10.7102	10.3585	10.6235	10.6189	10.3255	10.2636	10.6175	10.4256
ENSMUSG00000020227	605.109	-0.00114042	0.0611059	0.906477	0.990768	Irak3	interleukin-1 receptor-associated kinase 3	10	11.0516	11.2697	10.9666	10.7524	10.939	10.9171	10.9872	10.5771	11.0504	10.9805	11.1939
ENSMUSG00000020228	199.881	0.00287596	0.0617451	0.709859	0.963116	Helb	helicase (DNA) B	10	10.2881	10.731	10.4772	10.1536	10.3932	10.6673	10.2973	10.4691	10.5524	10.4506	10.4304
ENSMUSG00000020230	70.9292	-0.000552097	0.061978	0.887488	0.988226	Prmt2	protein arginine N-methyltransferase 2	10	10.3687	9.97226	9.88757	10.3787	10.1277	10.1669	9.99723	10.3045	10.1216	10.4494	9.99259
ENSMUSG00000020231	36.2443	-0.00433814	0.0622762	0.047192	0.839017	Dip2a	disco interacting protein 2 homolog A	10	9.88435	9.88435	10.2129	9.99699	9.8875	9.83078	10.0639	10.2485	10.0006	10.0176	10.1957
ENSMUSG00000020232	73.3097	-0.00822512	0.0628276	0.00898443	0.529353	Hmg20b	high mobility group 20B	10	9.82188	9.97614	9.8926	10.0426	10.1934	10.2277	10.4113	10.4275	10.2424	10.3131	10.2026
ENSMUSG00000020234	8.94403	0.000161971	0.0620975	0.932334	0.993986	4930404N11Rik	RIKEN cDNA 4930404N11 gene	10	9.87013	9.87013	9.86609	10.0735	9.80607	9.73295	9.87013	9.87013	9.73295	9.89367	9.98565
ENSMUSG00000020235	221.036	0.0113479	0.0626644	0.26351	0.935103	Fzr1	fizzy and cell division cycle 20 related 1	10	10.4509	10.5594	10.3591	10.5896	10.438	10.3216	10.3236	10.3664	10.28	10.5577	10.4297
ENSMUSG00000020238	309.76	-0.00784575	0.0627015	0.0612031	0.884171	Ncln	nicalin	10	9.85037	10.4693	10.2658	10.5102	10.4716	10.64	11.1113	10.8033	10.4459	10.771	10.8057
ENSMUSG00000020246	165.913	-0.00260934	0.0619161	0.641066	0.947209	Hcfc2	host cell factor C2	10	10.3988	10.1347	10.3548	10.1894	10.4443	10.6475	10.8362	10.183	10.267	10.3843	10.43
ENSMUSG00000020248	401.986	0.00086114	0.0613704	0.933302	0.993987	Nfyb	nuclear transcription factor-Y beta	10	10.8726	10.6503	10.7996	10.8409	10.8962	10.4795	10.6786	10.7831	10.6402	10.494	11.0726
ENSMUSG00000020250	587.189	0.00736586	0.0621186	0.399938	0.935103	Txnrd1	thioredoxin reductase 1	10	10.7507	11.4948	10.9911	10.5923	10.8561	11.0536	10.706	10.6838	10.9143	10.8595	11.095
ENSMUSG00000020253	214.378	-0.00550205	0.0620779	0.424327	0.935103	Ppm1m	protein phosphatase 1M	9	10.6745	10.1737	10.3146	10.2331	10.514	10.4441	10.6872	10.2498	10.577	10.4551	10.5862
ENSMUSG00000020255	1450.75	0.0171287	0.0632425	0.282521	0.935103	D10Wsu102e	DNA segment, Chr 10, Wayne State University 102, expressed	10	11.5615	11.5357	11.6103	11.7017	11.6747	11.4544	11.2497	11.7504	11.2613	11.6223	11.3456
ENSMUSG00000020257	961.308	0.0211287	0.0642121	0.255063	0.935103	Wdr82	WD repeat domain containing 82	9	11.0943	11.4379	11.2073	11.1782	11.1401	11.3221	11.1273	11.0857	11.0439	11.296	11.1166
ENSMUSG00000020258	184.655	-0.00333599	0.0621725	0.158846	0.935103	Glyctk	glycerate kinase	9	10.0743	9.71369	10.4384	10.1328	10.3142	10.4801	10.2389	11.3072	10.5025	10.2234	10.2432
ENSMUSG00000020260	112.491	-0.00113123	0.0619892	0.747364	0.969261	Pofut2	protein O-fucosyltransferase 2	10	10.0669	10.4602	9.99731	10.2689	10.4089	10.0675	9.91181	10.4924	10.2766	10.2687	10.3418
ENSMUSG00000020261	100.57	0.0013934	0.0620046	0.732541	0.967379	Slc36a1	solute carrier family 36 (proton/amino acid symporter), member 1	11	10.1974	10.2571	9.93885	10.0237	10.5121	10.4394	9.91661	10.4169	10.0961	10.2262	10.1425
ENSMUSG00000020263	118.766	0.0144426	0.0642761	0.0364921	0.792591	Appl2	adaptor protein, phosphotyrosine interaction, PH domain and leucine zipper containing 2	10	10.3465	10.5239	10.2586	10.2589	10.4936	10.5365	10.3539	10.0424	10.138	10.3465	10.1846
ENSMUSG00000020265	405.011	-0.0116712	0.0622537	0.371057	0.935103	Sumo3	small ubiquitin-like modifier 3	10	10.6578	10.8348	10.7288	10.7388	10.739	10.6086	10.9935	10.5157	10.7536	10.8631	10.8213
ENSMUSG00000020267	753.998	0.0134239	0.0569406	0.598427	0.937221	Hint1	histidine triad nucleotide binding protein 1	11	11.0762	11.0971	11.1457	11.185	11.0749	11.1259	11.0929	11.1615	11.1077	11.0429	11.0664
ENSMUSG00000020268	50.0989	0.000275384	0.0621092	0.625356	0.943906	Lyrm7	LYR motif containing 7	11	9.72092	9.77236	10.075	9.94975	10.117	10.0471	10.7691	9.72092	9.88216	9.92368	9.97611
ENSMUSG00000020271	320.587	-0.00302818	0.0617816	0.666388	0.951577	Fbxw11	F-box and WD-40 domain protein 11	11	10.6605	10.2877	10.4229	10.6383	10.8751	10.5865	10.7737	10.6542	10.9328	10.4141	10.2884
ENSMUSG00000020272	2034.65	-0.0563075	0.100673	0.013001	0.6129	Stk10	serine/threonine kinase 10	11	11.5925	11.5536	11.9057	11.4199	11.894	11.7051	12.1039	12.0563	11.7799	12.0486	12.0328
ENSMUSG00000020273	270.726	0.00382302	0.0616317	0.672276	0.953129	Papolg	poly(A) polymerase gamma	11	10.4882	10.7051	10.6555	10.5302	10.5462	10.5391	10.2663	10.7278	10.3281	10.7002	10.5286
ENSMUSG00000020275	1550.88	-0.00493586	0.0562194	0.837823	0.978492	Rel	reticuloendotheliosis oncogene	11	11.5619	11.6121	11.5053	11.5552	11.5965	11.5992	11.6583	11.4756	11.535	11.7232	11.5247
ENSMUSG00000020277	450.78	0.0159717	0.0644357	0.0978204	0.935103	Pfkl	phosphofructokinase, liver, B-type	10	11.1431	10.5278	10.5217	11.1051	10.8192	10.8943	10.6957	10.6503	10.5401	10.7334	10.6658
ENSMUSG00000020279	1676.99	-0.0103322	0.0613707	0.486618	0.935103	Il9r	interleukin 9 receptor	11	11.399	11.5533	11.6313	11.8478	11.6085	11.4777	11.9739	11.5664	11.508	11.8571	11.4315
ENSMUSG00000020280	167.035	0.00130095	0.0620022	0.727309	0.966259	Pus10	pseudouridylate synthase 10	11	9.92514	11.1595	10.2953	10.2945	10.3387	10.2226	10.1103	10.1728	10.6192	10.403	10.2202
ENSMUSG00000020282	195.037	-0.00323574	0.0616518	0.688568	0.957156	Rhbdf1	rhomboid 5 homolog 1	11	10.1422	10.5072	10.533	10.5872	10.5142	10.3433	10.68	10.5354	10.4896	10.3931	10.4031
ENSMUSG00000020284	51.3679	-0.00556164	0.0624091	0.0378006	0.794174	Cfap410	cilia and flagella associated protein 410	10	9.78509	9.93935	10.124	10.0261	9.92138	10.1802	10.5026	10.1455	10.2648	9.94251	10.1928
ENSMUSG00000020287	138.244	0.00374306	0.0618113	0.624615	0.943306	Mpg	N-methylpurine-DNA glycosylase	11	10.6687	10.0698	10.2494	10.4917	10.3805	10.3818	10.4816	10.236	10.3601	10.3143	10.3703
ENSMUSG00000020288	165.87	0.00183794	0.0618832	0.757135	0.969546	Ahsa2	AHA1, activator of heat shock protein ATPase 2	11	10.3971	10.506	10.5447	10.152	10.4378	10.439	9.99434	10.6119	10.3046	10.56	10.2034
ENSMUSG00000020289	146.252	0.0227932	0.0675148	0.0337967	0.778895	Nprl3	nitrogen permease regulator-like 3	11	10.6031	10.246	10.433	10.5015	10.4705	10.4029	10.3219	10.3576	10.2765	10.2167	10.3737
ENSMUSG00000020290	921.916	0.00397729	0.0597093	0.821592	0.976392	Xpo1	exportin 1	11	11.3577	11.0689	11.212	11.1307	11.3468	11.1225	11.0428	11.3184	11.1006	11.3077	11.1582
ENSMUSG00000020297	1.35606	-2.30384e-05	0.0621075	0.999616	0.999946	Nsg2	neuron specific gene family member 2	11	9.82034	9.82034	9.78274	9.78274	9.9227	9.78274	9.82034	9.82034	9.90594	9.78274	9.78274
ENSMUSG00000020300	416.081	0.014691	0.0624093	0.350982	0.935103	Cpeb4	cytoplasmic polyadenylation element binding protein 4	11	10.9287	10.724	10.8275	10.925	10.6748	10.6756	10.7191	10.6801	10.8109	10.6645	10.7627
ENSMUSG00000020305	131.365	-0.00432663	0.0621587	0.324235	0.935103	Asb3	ankyrin repeat and SOCS box-containing 3	11	9.91696	10.3008	10.2445	10.2919	10.1884	10.4161	10.3282	10.5839	10.1953	10.4408	10.2002
ENSMUSG00000020307	193.475	-0.000380974	0.0617973	0.949626	0.995953	Cdc34	cell division cycle 34	10	10.1251	10.4528	10.6193	10.5901	10.3871	10.399	10.7933	10.3445	10.3997	10.2247	10.3825
ENSMUSG00000020308	75.5611	0.000306221	0.0618093	0.964503	0.997929	Tpgs1	tubulin polyglutamylase complex subunit 1	10	10.0076	10.3083	9.98587	10.2094	10.3831	10.1029	10.2141	10.1787	10.1541	10.1662	10.2386
ENSMUSG00000020309	22.3908	-0.00275996	0.0621684	0.240637	0.935103	Chac2	ChaC, cation transport regulator 2	11	9.82752	10.0258	10.0684	9.8342	9.8342	9.94626	10.2886	9.76888	9.9409	10.1243	10.0954
ENSMUSG00000020311	299.177	-0.0116772	0.0634928	0.0286156	0.757774	Erlec1	endoplasmic reticulum lectin 1	11	10.2725	10.1601	10.3424	10.7265	10.6451	10.3321	10.428	11.3997	10.6401	10.7704	10.4989
ENSMUSG00000020315	2646.28	-0.00939938	0.061627	0.4778	0.935103	Sptbn1	spectrin beta, non-erythrocytic 1	11	11.4652	12.3798	12.0797	12.1695	12.0949	11.7804	12.2556	12.152	11.9768	11.9048	12.436
ENSMUSG00000020317	3.51237	-0.00101956	0.0621214	0.443126	0.935103	Theg	testicular haploid expressed gene	10	9.82575	9.82575	9.77733	9.77733	9.77733	9.91455	9.82575	9.90028	9.77733	10.0156	9.87128
ENSMUSG00000020321	984.976	-0.0135484	0.0617415	0.418958	0.935103	Mdh1	malate dehydrogenase 1, NAD (soluble)	11	11.4577	11.0242	11.3286	11.3237	11.2272	11.0903	11.3879	11.2543	11.2011	11.3502	11.4462
ENSMUSG00000020325	4.17928	0.000353812	0.0621112	0.757346	0.969546	Fstl3	follistatin-like 3	10	9.8415	9.8415	9.76158	9.76158	9.98868	9.93868	9.8415	9.8415	9.76158	9.91685	9.76158
ENSMUSG00000020326	840.646	0.00758628	0.0602446	0.659258	0.950008	Ccng1	cyclin G1	11	10.9961	11.3681	11.2087	11.2447	11.2532	11.0408	11.0176	11.2946	11.0818	11.1765	11.1778
ENSMUSG00000020328	144.428	0.00564442	0.0621577	0.389138	0.935103	Nudcd2	NudC domain containing 2	11	10.5957	10.2007	10.3159	10.3139	10.4311	10.4163	10.0596	10.4745	10.1922	10.2674	10.3914
ENSMUSG00000020329	191.477	0.00469374	0.0617951	0.580049	0.935103	Polrmt	polymerase (RNA) mitochondrial (DNA directed)	10	10.4816	10.5422	10.4171	10.4648	10.4569	10.4244	10.4324	10.2604	10.7418	10.1882	10.3107
ENSMUSG00000020330	13.3509	-0.00255805	0.0621748	0.0926298	0.935103	Hmmr	hyaluronan mediated motility receptor (RHAMM)	11	9.85606	9.85606	9.74702	10.0212	9.82014	9.74702	9.85606	10.0732	10.042	9.97038	10.0246
ENSMUSG00000020332	4.34813	-0.000563736	0.0621198	0.538029	0.935103	Meikin	meiotic kinetochore factor	11	9.75988	9.75988	9.8432	9.8432	9.8432	9.8432	10.0931	9.75988	9.8432	9.8432	9.8432
ENSMUSG00000020340	3092.74	-0.0640719	0.0974553	0.0508673	0.851548	Cyfip2	cytoplasmic FMR1 interacting protein 2	11	12.0264	12.1074	12.1965	11.9973	12.0936	12.3079	12.2562	12.4288	12.2388	12.3736	12.2253
ENSMUSG00000020346	1192.65	-0.0248587	0.0673912	0.1047	0.935103	Mgat1	mannoside acetylglucosaminyltransferase 1	11	11.1507	11.0432	11.1653	11.0339	11.4827	11.196	11.4986	11.3247	11.5528	11.1375	11.2119
ENSMUSG00000020349	1260.67	0.0119821	0.0627555	0.289788	0.935103	Ppp2ca	protein phosphatase 2 (formerly 2A), catalytic subunit, alpha isoform	11	11.9322	11.2184	11.8207	11.3362	11.2509	11.1513	11.1293	11.269	11.4589	11.2395	11.453
ENSMUSG00000020357	9.68936	0.000138408	0.0621155	0.647532	0.948441	Flt4	FMS-like tyrosine kinase 4	11	9.74906	9.74906	9.85402	9.85402	9.96569	9.85402	9.74906	10.2327	9.85402	9.85402	9.85402
ENSMUSG00000020358	2314.18	0.00757339	0.0601586	0.63322	0.945707	Hnrnpab	heterogeneous nuclear ribonucleoprotein A/B	11	12.0067	11.8316	12.2447	12.1533	11.8282	11.7021	12.1155	11.8001	11.8898	11.8596	11.8917
ENSMUSG00000020359	129.927	-0.00531613	0.0623341	0.0868433	0.935103	Phykpl	5-phosphohydroxy-L-lysine phospholyase	11	9.99282	10.0953	10.2391	10.1852	10.3853	10.2992	10.191	10.7726	10.0037	10.4725	10.2554
ENSMUSG00000020361	2304.35	0.00962794	0.0614468	0.501437	0.935103	Hspa4	heat shock protein 4	11	12.3443	11.7205	12.0725	11.7721	12.1427	11.7206	11.9357	11.663	11.7141	12.18	11.8088
ENSMUSG00000020362	574.447	0.0114869	0.062858	0.254785	0.935103	Cnot6	CCR4-NOT transcription complex, subunit 6	11	10.8709	11.1063	10.75	10.8035	10.7843	11.2836	10.5042	10.9822	10.8053	10.9305	10.7042
ENSMUSG00000020366	343.477	0.00680019	0.0620893	0.405653	0.935103	Mapk9	mitogen-activated protein kinase 9	11	11.0539	10.652	10.5237	10.5088	10.7795	10.8051	10.7236	10.2368	10.727	10.6192	10.7028
ENSMUSG00000020368	3355.47	0.0109059	0.0607496	0.533128	0.935103	Canx	calnexin	11	12.1789	12.5307	12.61	12.2647	12.1631	11.9394	12.0998	12.1857	12.1518	12.3551	12.2573
ENSMUSG00000020372	13334.5	0.00215972	0.0590345	0.909439	0.991173	Rack1	receptor for activated C kinase 1	11	14.1574	13.5332	13.7534	14.0528	14.0645	13.6773	13.6509	14.1349	13.9446	13.8435	13.7477
ENSMUSG00000020375	524.598	0.00591273	0.0608597	0.643608	0.947634	Rufy1	RUN and FYVE domain containing 1	11	11.104	10.779	10.9028	11.0248	10.8664	10.8535	10.774	10.9404	10.8042	11.0862	10.7577
ENSMUSG00000020376	999.543	0.0182202	0.0639932	0.233209	0.935103	Rnf130	ring finger protein 130	11	11.6597	11.1946	11.1645	11.2373	11.3428	11.49	11.108	11.1808	11.2094	11.1339	11.4227
ENSMUSG00000020380	488.702	-0.0130722	0.0628145	0.306309	0.935103	Rad50	RAD50 double strand break repair protein	11	10.8442	10.6734	10.9172	11.0595	10.7369	10.6582	11.0215	10.946	11.0064	10.8604	10.8603
ENSMUSG00000020381	22.5155	0.00137156	0.0620576	0.676932	0.953618	Mrnip	MRN complex interacting protein	11	9.86681	10.1528	10.0276	10.1146	9.83065	9.88091	10.0293	9.86681	10.0182	10.0144	9.9662
ENSMUSG00000020385	373.777	0.0205663	0.0665637	0.0271364	0.742557	Clk4	CDC like kinase 4	11	10.9145	10.6367	10.9991	11.0463	10.7115	10.6699	10.6828	10.6499	10.3973	10.4704	10.7523
ENSMUSG00000020386	234.655	-0.00015068	0.0606746	0.974219	0.998814	Sar1b	secretion associated Ras related GTPase 1B	11	10.6461	10.5122	10.5063	10.4767	10.629	10.4973	10.6226	10.3877	10.6743	10.5038	10.5075
ENSMUSG00000020387	1427.25	-0.0103283	0.0607285	0.545487	0.935103	Jade2	jade family PHD finger 2	11	11.2472	11.7316	11.6113	11.3405	11.601	11.3614	11.4752	11.6194	11.4989	11.6422	11.5733
ENSMUSG00000020388	5.77232	0.000454649	0.0621147	0.28484	0.935103	Pdlim4	PDZ and LIM domain 4	11	9.76357	9.91783	9.89907	9.83951	9.83951	10.028	10.0548	9.76357	9.83951	9.83951	9.83951
ENSMUSG00000020390	355.429	0.00319634	0.0613865	0.752103	0.969546	Ube2b	ubiquitin-conjugating enzyme E2B	11	10.8818	10.8279	10.5918	10.8462	10.6023	10.4756	10.44	10.6005	10.8584	10.7127	10.7258
ENSMUSG00000020392	399.46	0.0074707	0.0618579	0.479183	0.935103	Cdkn2aipnl	CDKN2A interacting protein N-terminal like	11	10.8323	10.9217	10.6199	10.661	10.8361	10.8203	10.8561	10.3433	10.808	10.6613	10.7619
ENSMUSG00000020393	153.718	-0.00346789	0.0614076	0.737749	0.967803	Kremen1	kringle containing transmembrane protein 1	11	10.4867	10.2741	10.3292	10.3708	10.38	10.497	10.428	10.408	10.222	10.5106	10.4847
ENSMUSG00000020395	23.3699	0.00175244	0.0621265	0.35058	0.935103	Itk	IL2 inducible T cell kinase	11	9.79359	10.3154	10.1483	9.80949	9.89391	10.0984	9.79359	9.97604	9.80949	10.0367	9.99134
ENSMUSG00000020397	129.864	-0.00147154	0.0613952	0.873561	0.987092	Med7	mediator complex subunit 7	11	10.2693	10.4234	10.2402	10.273	10.4668	10.3804	10.4974	10.1975	10.2881	10.3734	10.4063
ENSMUSG00000020400	685.667	0.00213469	0.06133	0.872018	0.986858	Tnip1	TNFAIP3 interacting protein 1	11	11.2126	11.2159	11.3354	10.7997	10.731	10.8835	10.7992	10.8539	11.2669	11.1374	10.9889
ENSMUSG00000020402	366.6	0.00888037	0.0614329	0.514406	0.935103	Vdac1	voltage-dependent anion channel 1	11	10.6132	10.7405	10.7232	10.7097	10.6891	10.8593	10.7414	10.6858	10.8177	10.4706	10.597
ENSMUSG00000020409	777.188	-0.0124298	0.0624765	0.338325	0.935103	Slu7	SLU7 splicing factor homolog (S. cerevisiae)	11	10.7199	11.2767	10.9194	11.0894	11.0876	11.1045	11.0687	11.292	11.2822	11.2051	10.9369
ENSMUSG00000020411	2.11805	0.000324297	0.0621106	0.789556	0.973301	Nipal4	NIPA-like domain containing 4	11	9.83195	9.83195	9.95935	9.77113	9.84424	9.77113	9.83195	9.83195	9.77113	9.85416	9.8525
ENSMUSG00000020412	210.381	-0.00567605	0.0620971	0.389633	0.935103	Ascc2	activating signal cointegrator 1 complex subunit 2	11	10.3112	10.3188	10.6991	10.306	10.49	10.4473	10.2996	10.9559	10.4148	10.4868	10.4554
ENSMUSG00000020413	144.979	0.000216382	0.0620566	0.942445	0.995639	Hus1	HUS1 checkpoint clamp component	11	9.9872	10.1326	10.0772	10.717	10.4112	10.3898	10.4814	10.3625	9.94412	10.1933	9.95392
ENSMUSG00000020415	81.0187	0.0014345	0.0617032	0.845974	0.980461	Pttg1	pituitary tumor-transforming gene 1	11	10.1116	10.3025	10.1889	10.3497	10.2074	10.2823	10.0768	10.4558	10.1429	10.2162	10.2695
ENSMUSG00000020420	111.352	-4.76225e-05	0.0619181	0.982356	0.999188	Zfp607a	zinc finger protein 607A	7	10.3052	10.2116	10.4193	10.1459	10.2542	10.1613	9.94462	10.4609	10.2246	10.1369	10.2718
ENSMUSG00000020422	438.067	0.00133051	0.0603929	0.934128	0.993987	Tns3	tensin 3	11	10.7272	10.8486	10.6781	10.9891	10.8266	10.6986	10.8812	10.7116	10.7519	10.9206	10.6799
ENSMUSG00000020423	1540.2	-0.0052842	0.0581248	0.81695	0.976392	Btg2	BTG anti-proliferation factor 2	1	11.6388	11.5562	11.4718	11.4187	11.4961	11.487	11.5431	11.3542	11.6474	11.6528	11.4877
ENSMUSG00000020424	20.3377	-0.0010872	0.0621101	0.296369	0.935103	Castor1	cytosolic arginine sensor for mTORC1 subunit 1	11	9.85356	9.85356	9.74952	9.74952	10.0259	10.1258	9.85356	10.2101	10.069	9.93038	9.9487
ENSMUSG00000020430	797.206	0.0134233	0.0624778	0.347024	0.935103	Pes1	pescadillo ribosomal biogenesis factor 1	11	11.277	11.2132	11.2285	10.9675	11.1136	11.2673	11.0993	10.9087	10.921	11.3648	11.0092
ENSMUSG00000020432	107.571	0.00333445	0.0621301	0.399534	0.935103	Tcn2	transcobalamin 2	11	10.0081	10.6033	10.1635	10.4306	10.2981	10.1545	10.3737	9.90656	10.1284	10.1854	10.2
ENSMUSG00000020434	1.51551	0.000939817	0.0621231	0.459947	0.935103	4921536K21Rik	RIKEN cDNA 4921536K21 gene	11	9.77713	9.95522	9.82595	9.82595	9.82595	9.89066	9.83131	9.77713	9.82595	9.82595	9.82595
ENSMUSG00000020437	926.48	-0.0117673	0.062806	0.27537	0.935103	Myo1g	myosin IG	11	11.3764	10.7935	11.0484	11.1368	11.1504	11.1939	11.6574	10.9231	11.5403	11.0025	11.2409
ENSMUSG00000020440	344.477	0.00274746	0.0607801	0.752646	0.969546	Arf5	ADP-ribosylation factor 5	6	10.7308	10.8338	10.5502	10.6673	10.5702	10.8076	10.6037	10.5549	10.8292	10.6267	10.7143
ENSMUSG00000020441	168.71	0.00879202	0.0622103	0.379986	0.935103	2310033P09Rik	RIKEN cDNA 2310033P09 gene	11	10.2634	10.6187	10.5067	10.4286	10.3867	10.3714	10.4107	10.3125	10.2419	10.4219	10.4519
ENSMUSG00000020444	95.0853	-0.00400667	0.0622022	0.229063	0.935103	Guk1	guanylate kinase 1	11	10.0523	10.1529	10.1474	10.2921	10.2349	10.0357	10.7148	9.86694	10.1503	10.3858	10.1308
ENSMUSG00000020447	2.06312	0.000476587	0.0621187	0.540732	0.935103	Npc1l1	NPC1 like intracellular cholesterol transporter 1	11	9.77281	10.0026	9.83027	9.83027	9.83027	9.83027	9.77281	9.77281	9.83027	9.83027	9.83027
ENSMUSG00000020448	159.253	-0.00595274	0.0619769	0.473362	0.935103	Rnf185	ring finger protein 185	11	10.414	10.4578	10.4691	10.2122	10.509	10.1973	10.2637	10.4911	10.5056	10.5818	10.3717
ENSMUSG00000020451	232.566	0.0046638	0.061963	0.497367	0.935103	Limk2	LIM motif-containing protein kinase 2	11	10.1853	10.6519	10.716	10.3715	10.601	10.6896	10.7436	10.4481	10.2586	10.4591	10.4546
ENSMUSG00000020453	334.847	0.484064	0.403544	0.00351808	0.330748	Patz1	POZ (BTB) and AT hook containing zinc finger 1	11	10.7032	10.7244	10.8529	10.6101	10.7216	10.8736	10.4942	10.6702	10.4294	10.5967	10.4518
ENSMUSG00000020454	596.872	-0.0107518	0.0629102	0.191463	0.935103	Eif4enif1	eukaryotic translation initiation factor 4E nuclear import factor 1	11	10.4382	10.8887	10.8136	11.2434	10.7418	10.8166	10.8087	11.5717	10.9211	10.9235	11.0278
ENSMUSG00000020455	296.469	-0.00740313	0.061995	0.421022	0.935103	Trim11	tripartite motif-containing 11	11	10.5186	10.4391	10.3911	10.608	10.6836	10.8024	10.6453	10.85	10.6991	10.4139	10.6945
ENSMUSG00000020456	1302.38	0.0209235	0.0642664	0.245496	0.935103	Ogdh	oxoglutarate (alpha-ketoglutarate) dehydrogenase (lipoamide)	11	11.3811	11.6981	11.4302	11.6064	11.3744	11.4557	11.2044	11.4557	11.2323	11.3886	11.5562
ENSMUSG00000020457	512.531	-0.00851636	0.0624077	0.308924	0.935103	Drg1	developmentally regulated GTP binding protein 1	11	10.6385	10.7903	11.2243	10.5659	10.4855	10.7503	11.117	10.7137	10.5263	10.9919	11.1601
ENSMUSG00000020458	761.312	-0.000346764	0.0597881	0.979015	0.999188	Rtn4	reticulon 4	11	11.2486	11.0701	11.0369	11.2843	11.08	10.9325	10.9777	11.1397	11.1253	11.0568	11.2475
ENSMUSG00000020459	186.124	-0.00934395	0.0624802	0.303752	0.935103	Mtif2	mitochondrial translational initiation factor 2	11	10.3792	10.47	10.3273	10.4337	10.2998	10.5422	10.6996	10.2345	10.3689	10.5298	10.619
ENSMUSG00000020460	11276.7	-0.00903372	0.0539934	0.737173	0.967803	Rps27a	ribosomal protein S27A	11	13.8371	13.5558	13.6317	13.7675	13.7852	13.6143	13.7338	13.7282	13.8137	13.6879	13.6956
ENSMUSG00000020462	276.331	-0.00753082	0.06238	0.290092	0.935103	Cfap36	cilia and flagella associated protein 36	11	10.1653	11.0053	10.4391	10.4249	10.501	10.5752	10.3689	10.7746	10.5437	10.919	10.6467
ENSMUSG00000020463	1113.24	0.00753669	0.06183	0.481264	0.935103	Ppp4r3b	protein phosphatase 4 regulatory subunit 3B	11	11.7956	10.8328	11.6668	11.2432	11.3736	11.3595	11.6616	11.0888	11.2932	11.2072	11.2696
ENSMUSG00000020464	248.266	0.000836278	0.0614603	0.926669	0.993436	Pnpt1	polyribonucleotide nucleotidyltransferase 1	11	10.4309	10.418	10.5225	10.4362	10.6418	10.7369	10.7263	10.4951	10.2529	10.4625	10.5702
ENSMUSG00000020471	146.845	-0.00688224	0.0616744	0.509788	0.935103	Pold2	polymerase (DNA directed), delta 2, regulatory subunit	11	10.4759	10.2285	10.4853	10.3378	10.3501	10.3695	10.3631	10.5189	10.5043	10.3984	10.3308
ENSMUSG00000020472	177.994	0.00277831	0.0619704	0.593132	0.936505	Zkscan17	zinc finger with KRAB and SCAN domains 17	11	10.9131	10.2022	10.2926	10.5531	10.2033	10.251	10.18	10.2536	10.4753	10.3717	10.5636
ENSMUSG00000020474	132.337	0.00272726	0.0619534	0.633346	0.945707	Polm	polymerase (DNA directed), mu	11	10.3817	10.4233	10.4746	10.2085	10.357	10.28	10.5059	9.93782	10.3677	10.2252	10.2725
ENSMUSG00000020476	1834.24	0.0014753	0.0608138	0.916995	0.991763	Dbnl	drebrin-like	11	12.1244	11.5263	11.8315	11.7876	11.5204	11.6238	11.1919	12.0391	11.7674	11.8399	11.6726
ENSMUSG00000020477	186.465	-0.00254206	0.0617284	0.733985	0.967379	Mrps24	mitochondrial ribosomal protein S24	11	10.6335	10.3217	10.2376	10.5177	10.5337	10.3637	10.6759	10.1504	10.4475	10.6279	10.3895
ENSMUSG00000020482	283.425	0.000521275	0.0612086	0.963145	0.997929	Ccdc117	coiled-coil domain containing 117	11	10.3744	10.711	10.5529	10.3804	10.7769	10.6078	10.505	10.69	10.5056	10.6224	10.5448
ENSMUSG00000020483	124.62	0.00147028	0.0619636	0.75602	0.969546	Dynll2	dynein light chain LC8-type 2	11	9.86715	10.5415	10.2247	10.43	10.3898	10.2568	10.478	10.2568	10.3118	10.1638	10.2241
ENSMUSG00000020484	555.862	-0.0152651	0.063728	0.179456	0.935103	Xbp1	X-box binding protein 1	11	10.8091	10.5353	11	10.7791	10.8546	10.8439	11.2142	10.9065	10.8811	10.8295	10.8756
ENSMUSG00000020485	286.041	0.00767739	0.0617366	0.488103	0.935103	Supt4a	SPT4A, DSIF elongation factor subunit	11	10.5438	10.7033	10.6237	10.4864	10.6945	10.7543	10.7918	10.3806	10.5239	10.533	10.6183
ENSMUSG00000020486	3.21685	-0.00107123	0.0621241	0.246207	0.935103	Septin4	septin 4	11	9.79937	9.79937	9.89787	9.80371	9.80371	9.80371	9.79937	10.0033	9.80371	9.96969	9.87015
ENSMUSG00000020490	1.33564	0.000745076	0.0621225	0.316458	0.935103	Btnl10	butyrophilin-like 10	11	9.81475	9.81475	9.78833	9.97331	9.78833	9.78833	9.81475	9.81475	9.78833	9.78833	9.78833
ENSMUSG00000020491	126.699	-0.00239224	0.061961	0.647455	0.948441	2810021J22Rik	RIKEN cDNA 2810021J22 gene	11	10.4586	10.1839	10.0449	10.4736	10.2487	10.3832	10.681	9.96793	10.3627	10.3826	10.3643
ENSMUSG00000020492	74.3647	0.00159648	0.0620748	0.61937	0.942458	Ska2	spindle and kinetochore associated complex subunit 2	11	9.93465	10.247	10.5221	9.95867	10.2926	9.7978	10.2722	9.93465	10.0871	10.1433	9.87836
ENSMUSG00000020493	8.69145	0.000210871	0.0620961	0.862499	0.986108	Prr11	proline rich 11	11	9.85229	9.97826	9.75079	9.99421	9.89075	9.75079	9.85229	9.85229	9.98916	10.013	9.79777
ENSMUSG00000020495	213.04	-0.000529665	0.0616324	0.93737	0.99502	Smg8	smg-8 homolog, nonsense mediated mRNA decay factor (C. elegans)	11	10.2291	10.4628	10.3307	10.7935	10.5026	10.4998	10.5013	10.7277	10.4316	10.3767	10.4265
ENSMUSG00000020496	704.152	0.0163671	0.0636787	0.242393	0.935103	Rnf187	ring finger protein 187	11	11.2947	10.9168	11.127	11.0067	10.8655	11.0155	10.9147	10.8146	10.7469	11.0981	11.0369
ENSMUSG00000020513	40.8457	-0.00244863	0.0620567	0.495472	0.935103	Tubd1	tubulin, delta 1	11	10.0731	9.83874	10.0646	10.1211	10.0682	10.1461	10.2429	10.1499	10.036	10.1842	9.91285
ENSMUSG00000020514	60.3289	-0.00211403	0.0620328	0.601613	0.938271	Mrpl22	mitochondrial ribosomal protein L22	11	9.74604	10.4661	10.1263	10.1096	9.98365	10.1701	10.2373	10.1286	10.2232	10.1442	10.2545
ENSMUSG00000020515	455.244	-0.007324	0.0608262	0.611848	0.939563	Cnot8	CCR4-NOT transcription complex, subunit 8	11	10.6486	10.8052	10.8248	10.7587	10.8155	10.9068	10.9829	10.8072	10.7092	10.9574	10.7043
ENSMUSG00000020516	238.838	-0.0027845	0.0618582	0.67215	0.953129	Rps6kb1	ribosomal protein S6 kinase, polypeptide 1	11	10.2301	10.4206	10.1378	10.3749	10.6537	10.7883	10.6797	10.4602	10.4746	10.4371	10.2672
ENSMUSG00000020519	116.441	0.00155711	0.061972	0.743066	0.968398	Sap30l	SAP30-like	11	10.3522	10.4786	10.174	10.3741	10.1452	10.4015	10.4633	9.82735	10.2141	10.3293	10.3244
ENSMUSG00000020520	227.59	-0.00607128	0.0615813	0.567469	0.935103	Galnt10	polypeptide N-acetylgalactosaminyltransferase 10	11	10.5651	10.3467	10.3131	10.4878	10.5826	10.6659	10.4888	10.6808	10.5196	10.5051	10.5685
ENSMUSG00000020521	165.043	-0.00583381	0.0623934	0.0832186	0.933043	Rnft1	ring finger protein, transmembrane 1	11	9.82939	10.1698	10.3243	10.2901	10.1859	10.5515	10.7431	10.6844	10.3061	10.413	10.4259
ENSMUSG00000020522	383.489	0.00749645	0.0616057	0.517509	0.935103	Mfap3	microfibrillar-associated protein 3	11	10.5828	10.7892	10.7234	10.7068	10.758	10.9378	10.5831	10.9247	10.5291	10.6248	10.7596
ENSMUSG00000020523	274.199	-0.0112899	0.0628155	0.230088	0.935103	Fam114a2	family with sequence similarity 114, member A2	11	10.3798	10.3909	10.7871	10.4291	10.5736	10.5869	10.7535	10.7982	10.5421	10.5776	10.5677
ENSMUSG00000020525	305.167	0.00092091	0.0609524	0.915816	0.991404	Ppm1d	protein phosphatase 1D magnesium-dependent, delta isoform	11	10.7604	10.6241	10.6002	10.6245	10.4733	10.5009	10.5816	10.422	10.5851	10.7996	10.5955
ENSMUSG00000020526	76.5718	0.000487512	0.0619677	0.914889	0.991262	Znhit3	zinc finger, HIT type 3	11	10.3921	10.0119	10.2823	9.8862	10.2963	10.3066	10.4144	9.99534	10.2393	10.1734	10.24
ENSMUSG00000020527	17.0351	-0.000917017	0.0620837	0.643062	0.947588	Myo19	myosin XIX	11	9.83384	9.9699	10.0975	9.95423	9.97154	9.86074	9.83384	10.1706	10.0267	9.76924	9.98435
ENSMUSG00000020528	192.417	-0.0250221	0.0687321	0.0251244	0.735031	Prpsap2	phosphoribosyl pyrophosphate synthetase-associated protein 2	11	10.3415	10.2609	10.2901	10.3415	10.5164	10.4135	10.4506	10.6826	10.5585	10.3967	10.5203
ENSMUSG00000020530	613.911	-0.0062649	0.0618921	0.472759	0.935103	Ggnbp2	gametogenetin binding protein 2	11	10.9834	10.5473	11.1374	10.9212	10.8318	10.8954	11.4616	10.723	10.8534	11.0425	10.8201
ENSMUSG00000020532	463.061	-0.0131039	0.0636024	0.100672	0.935103	Acaca	acetyl-Coenzyme A carboxylase alpha	11	10.8156	10.5376	10.8938	10.4829	10.7304	10.7615	10.4672	11.388	10.9398	11.1254	10.6807
ENSMUSG00000020534	104.724	0.000926381	0.0619519	0.849131	0.981297	Shmt1	serine hydroxymethyltransferase 1 (soluble)	11	9.96951	10.4497	10.3562	10.4696	10.0131	9.94664	10.134	10.3178	10.2728	10.2725	10.1935
ENSMUSG00000020536	116.1	0.00288728	0.0620944	0.417079	0.935103	Llgl1	LLGL1 scribble cell polarity complex component	11	10.058	10.6084	10.1273	10.2464	10.183	10.1488	10.1547	10.0497	10.2859	10.147	10.3855
ENSMUSG00000020537	136.578	0.0147866	0.0644222	0.022484	0.7207	Drg2	developmentally regulated GTP binding protein 2	11	10.4506	10.6594	10.4574	10.3594	10.3644	10.2988	10.0378	10.1739	10.4453	10.1767	10.2109
ENSMUSG00000020538	527.779	0.00640295	0.0621079	0.405252	0.935103	Srebf1	sterol regulatory element binding transcription factor 1	11	11.3485	10.8912	10.7091	11.1656	10.7158	10.6386	10.5176	10.6385	10.8971	11.1836	10.6328
ENSMUSG00000020544	18.5135	0.00286153	0.0621771	0.152148	0.935103	Cox11	cytochrome c oxidase assembly protein 11, copper chaperone	11	10.0938	9.98549	10.0771	9.74357	10.0644	9.98541	9.85951	9.85951	9.95234	10.0337	9.79055
ENSMUSG00000020546	79.1672	0.00438718	0.0622149	0.274472	0.935103	Stxbp4	syntaxin binding protein 4	11	10.1098	10.5772	10.0899	10.2649	10.2164	10.2128	9.84143	10.1941	10.2616	10.0488	10.1699
ENSMUSG00000020547	735.394	0.0116364	0.0616083	0.43769	0.935103	Bzw2	basic leucine zipper and W2 domains 2	12	11.3895	10.9016	11.0423	11.1526	11.0552	11.0191	10.8777	11.0806	11.0452	11.0338	11.0883
ENSMUSG00000020549	223.607	-0.00805313	0.0617732	0.47952	0.935103	Elac2	elaC ribonuclease Z 2	11	10.4923	10.3821	10.6367	10.3145	10.4309	10.5975	10.5256	10.6115	10.5755	10.4111	10.5537
ENSMUSG00000020553	162.083	0.00125881	0.061373	0.899576	0.990655	Pctp	phosphatidylcholine transfer protein	11	10.4032	10.4838	10.3436	10.479	10.5062	10.2318	10.197	10.5247	10.4243	10.3939	10.4366
ENSMUSG00000020561	505.278	-0.00112973	0.0604856	0.93265	0.993986	Polr1f	RNA polymerase I subunit F	12	11.0363	10.6793	10.8164	10.8786	10.7039	10.8913	10.674	10.9698	10.877	10.8197	10.8921
ENSMUSG00000020564	408.756	-0.0315137	0.0721672	0.0450009	0.835593	Atxn7l1	ataxin 7-like 1	12	10.4422	10.8677	10.6543	10.7722	10.753	10.6346	10.9081	10.8555	10.874	10.8517	10.8391
ENSMUSG00000020570	500.993	-0.0272836	0.0701412	0.0209974	0.703665	Sypl	synaptophysin-like protein	12	10.6459	10.7049	10.6901	10.8696	10.8355	10.6991	11.4223	10.6431	11.0651	10.8156	11.0033
ENSMUSG00000020571	683.956	0.000962229	0.0602699	0.949923	0.995953	Pdia6	protein disulfide isomerase associated 6	12	10.9281	11.0438	11.3349	10.8212	11.0112	10.9557	10.9746	11.1252	11.0165	10.9713	11.0147
ENSMUSG00000020572	360.769	-0.0226273	0.066923	0.0716656	0.921091	Nampt	nicotinamide phosphoribosyltransferase	12	10.499	10.5821	10.5025	10.7943	10.7525	10.5747	10.9336	10.7527	10.6927	10.6286	10.8977
ENSMUSG00000020573	856.962	-0.0869063	0.135403	0.0281604	0.752492	Pik3cg	phosphatidylinositol-4,5-bisphosphate 3-kinase catalytic subunit gamma	12	11.1278	11.0491	11.2114	11.0042	11.046	11.0876	11.1691	11.2486	11.2078	11.272	11.2117
ENSMUSG00000020576	653.963	-0.016437	0.0644403	0.107927	0.935103	Nbas	neuroblastoma amplified sequence	12	10.6913	10.8299	10.8954	10.8939	11.0836	10.9382	10.768	11.6323	10.9428	11.0698	11.0389
ENSMUSG00000020577	715.366	0.00755552	0.0605621	0.634369	0.945707	Tspan13	tetraspanin 13	12	10.9634	11.1003	11.1037	10.7957	11.1554	11.1723	11.119	10.9382	11.0064	10.8965	11.0817
ENSMUSG00000020580	982.823	0.0253624	0.061515	0.336204	0.935103	Rock2	Rho-associated coiled-coil containing protein kinase 2	12	11.2468	11.331	11.2447	11.235	11.3136	11.3135	11.1362	11.3048	11.1616	11.2547	11.2596
ENSMUSG00000020583	1.17535	0.000740575	0.0621224	0.337391	0.935103	Matn3	matrilin 3	12	9.81394	9.81394	9.96269	9.78914	9.78914	9.78914	9.81394	9.81394	9.78914	9.78914	9.78914
ENSMUSG00000020585	443.902	-0.0154152	0.0639261	0.169867	0.935103	Laptm4a	lysosomal-associated protein transmembrane 4A	12	10.828	10.5636	10.7531	10.5116	10.6733	10.9073	11.0993	10.6138	10.9213	10.7246	10.942
ENSMUSG00000020589	763.651	-0.000890829	0.0610035	0.942943	0.995639	Cyria	CYFIP related Rac1 interactor A	12	10.9152	11.1408	11.1023	10.9598	11.1701	11.1808	11.4848	10.7519	11.1434	10.925	11.0309
ENSMUSG00000020590	418.582	0.00138253	0.061482	0.881561	0.987779	Snx13	sorting nexin 13	12	10.9376	10.4542	11.1571	10.8066	10.6234	10.5839	10.6915	10.9817	10.8222	10.6258	10.7448
ENSMUSG00000020592	4.6889	0.000294474	0.0621098	0.820871	0.976392	Sdc1	syndecan 1	12	9.84128	9.84128	10.0407	9.85738	9.7618	9.7618	9.84128	9.84128	9.7618	9.7618	9.94365
ENSMUSG00000020593	147.163	0.0147862	0.064211	0.0736265	0.924167	Lpin1	lipin 1	12	10.5977	10.4131	10.3463	10.2947	10.5524	10.3234	10.269	10.1368	10.3632	10.1811	10.4179
ENSMUSG00000020594	2193.42	0.0230626	0.0666902	0.111003	0.935103	Pum2	pumilio RNA-binding family member 2	12	11.8844	12.07	12.0413	12.3971	11.6207	11.8078	11.7287	11.7426	11.533	12.0467	11.5483
ENSMUSG00000020598	2.69138	0.000738126	0.0621166	0.562304	0.935103	Nrcam	neuronal cell adhesion molecule	12	9.76406	9.96314	9.83902	9.83902	9.92344	9.83902	9.76406	9.91306	9.83902	9.83902	9.83902
ENSMUSG00000020599	0.694668	0.000713558	0.0621216	0.435391	0.935103	Rgs9	regulator of G-protein signaling 9	11	9.81107	9.81107	9.79201	9.79201	9.92546	9.79201	9.81107	9.81107	9.79201	9.79201	9.79201
ENSMUSG00000020601	76.7651	1.25327	1.56851	0.00344854	0.330748	Trib2	tribbles pseudokinase 2	12	10.2426	10.2728	10.1142	10.6105	10.1989	10.0259	10.1161	9.90644	10.022	9.96211	10.0077
ENSMUSG00000020604	8.20872	5.20791e-05	0.0620997	0.971953	0.998764	Arsg	arylsulfatase G	11	9.84957	9.92232	9.75351	9.75351	9.81321	10.0238	9.84957	9.84957	9.75351	10.0823	9.89441
ENSMUSG00000020605	127.534	0.00779589	0.0627097	0.0678534	0.911911	Hs1bp3	HCLS1 binding protein 3	12	10.6925	10.3148	10.3717	10.4172	10.2585	10.3794	9.86229	10.259	10.0159	10.2012	10.331
ENSMUSG00000020608	2701.88	0.0175522	0.0630134	0.308532	0.935103	Smc6	structural maintenance of chromosomes 6	12	12.4807	12.054	11.9895	12.1514	12.0463	12.2958	11.6804	12.1876	12.0888	11.931	12.2018
ENSMUSG00000020609	7.86955	-0.00109008	0.0621274	0.276888	0.935103	Apob	apolipoprotein B	12	9.74897	9.74897	9.85411	9.85411	9.85411	9.85411	9.74897	10.1944	9.89768	9.85411	9.85411
ENSMUSG00000020610	101.648	0.00101065	0.0620188	0.779617	0.971843	Amz2	archaelysin family metallopeptidase 2	11	9.87523	10.7801	10.1147	10.2503	10.2656	10.0962	10.3137	9.90787	10.1448	10.3355	10.3272
ENSMUSG00000020611	1067.99	-0.0141078	0.0631405	0.244758	0.935103	Gna13	guanine nucleotide binding protein, alpha 13	11	11.0422	11.0325	10.9931	11.1939	11.4789	11.4187	11.3721	11.5953	11.3526	11.3697	11.0166
ENSMUSG00000020612	2147.92	0.0145144	0.0640337	0.0940503	0.935103	Prkar1a	protein kinase, cAMP dependent regulatory, type I, alpha	11	12.7012	11.6542	11.6395	12.0232	11.8446	11.6897	11.0266	11.5857	11.9145	11.1986	11.8833
ENSMUSG00000020614	2.38198	-0.000541855	0.0621195	0.549936	0.935103	Fam20a	FAM20A, golgi associated secretory pathway pseudokinase	11	9.77068	9.77068	9.8324	9.8324	9.8324	9.8324	9.77068	10.0176	9.8324	9.8324	9.8324
ENSMUSG00000020620	1.59933	-0.00026979	0.0621085	0.841269	0.979509	Abca8b	ATP-binding cassette, sub-family A (ABC1), member 8b	11	9.82191	9.82191	9.78117	9.78117	9.78117	9.91055	9.82191	9.82191	9.78117	9.78117	9.93693
ENSMUSG00000020621	147.589	0.00798037	0.0623165	0.337242	0.935103	Rdh14	retinol dehydrogenase 14 (all-trans and 9-cis)	12	10.3329	10.5678	10.1141	10.4884	10.4162	10.5428	10.3013	10.3149	10.3407	10.3948	10.3576
ENSMUSG00000020623	130.819	0.00619269	0.0621222	0.401657	0.935103	Map2k6	mitogen-activated protein kinase kinase 6	11	10.5576	10.4152	10.2022	10.4811	10.2477	10.3808	10.0729	10.3188	10.3064	10.4613	10.3082
ENSMUSG00000020628	446.592	0.0067285	0.0604363	0.674821	0.953618	Trappc12	trafficking protein particle complex 12	12	10.6928	10.9259	10.6926	10.8636	10.7314	10.7575	10.7272	10.715	10.7655	10.8992	10.647
ENSMUSG00000020629	304.396	0.0349071	0.0754566	0.0223183	0.7207	Adi1	acireductone dioxygenase 1	12	10.7083	10.9103	10.543	10.7916	10.672	10.6782	10.4448	10.4892	10.6216	10.6225	10.5381
ENSMUSG00000020630	80.0913	-0.000273099	0.0619103	0.98066	0.999188	Rnaseh1	ribonuclease H1	12	10.514	10.2529	10.1943	10.028	10.2558	10.1764	10.1444	9.96159	10.4075	10.1671	10.2983
ENSMUSG00000020634	278.165	-0.00721863	0.0622543	0.325237	0.935103	Ubxn2a	UBX domain protein 2A	12	10.1027	10.6362	10.4997	10.5658	10.6831	10.6057	10.7248	10.8686	10.3872	10.6412	10.6991
ENSMUSG00000020638	127.657	-0.00242743	0.0619765	0.577464	0.935103	Cmpk2	cytidine monophosphate (UMP-CMP) kinase 2, mitochondrial	12	10.0644	10.2232	10.4788	10.3946	10.3219	10.2033	10.1776	10.7249	10.2191	10.2912	10.1738
ENSMUSG00000020640	2067.3	0.00397575	0.0585907	0.876777	0.98732	Itsn2	intersectin 2	12	12.1057	11.7053	11.7408	11.8426	11.7649	11.9919	11.714	11.8833	11.7777	11.9238	11.9229
ENSMUSG00000020641	95.62	0.00508065	0.0622279	0.29011	0.935103	Rsad2	radical S-adenosyl methionine domain containing 2	12	10.4184	10.0973	10.4609	10.3063	10.1188	10.3807	9.94823	10.521	10.2236	10.1174	10.116
ENSMUSG00000020642	408.812	0.00232639	0.0617589	0.728499	0.966487	Rnf144a	ring finger protein 144A	12	11.0211	11.1924	10.6206	10.5875	10.7307	10.7482	10.6365	10.1384	10.9876	10.7967	10.7583
ENSMUSG00000020644	143.55	-0.0067479	0.0621746	0.363999	0.935103	Id2	inhibitor of DNA binding 2	12	10.2084	10.3014	10.2487	10.5116	10.4799	10.086	10.4446	10.433	10.4763	10.2184	10.4072
ENSMUSG00000020647	867.069	0.0106827	0.0631551	0.0989882	0.935103	Ncoa1	nuclear receptor coactivator 1	12	11.4494	10.9121	11.0726	12.1915	11.0716	10.6389	10.8823	11.0967	10.5761	11.2089	10.8364
ENSMUSG00000020648	75.2819	-0.00776069	0.0628023	0.00221202	0.261377	Dus4l	dihydrouridine synthase 4-like (S. cerevisiae)	12	9.97476	9.97476	9.8976	9.77165	10.0907	9.78001	10.266	9.97476	10.5226	10.4171	9.85342
ENSMUSG00000020649	79.843	-0.00157009	0.062003	0.717806	0.963126	Rrm2	ribonucleotide reductase M2	12	10.6518	9.89088	10.094	10.0463	10.1777	10.1737	10.0511	10.1718	10.323	10.3903	10.1348
ENSMUSG00000020650	334.016	0.00456272	0.0616229	0.632045	0.945707	Bcap29	B cell receptor associated protein 29	12	10.7637	10.6748	10.7264	10.6428	10.5892	10.8752	10.8266	10.4472	10.3608	10.8036	10.7485
ENSMUSG00000020652	188.428	-0.00157346	0.0618184	0.791351	0.973783	Cenpo	centromere protein O	12	10.3292	10.3319	10.5312	10.4356	10.2755	10.6508	10.9504	10.1551	10.3204	10.4902	10.3877
ENSMUSG00000020653	106.293	-0.00278306	0.0621347	0.239673	0.935103	Klf11	Kruppel-like factor 11	12	9.88659	10.1221	10.3805	10.3403	10.1372	9.93573	10.8033	9.99197	10.2052	10.1967	10.2113
ENSMUSG00000020654	115.647	0.00411059	0.0619686	0.554267	0.935103	Adcy3	adenylate cyclase 3	12	10.5006	10.1841	10.1443	10.2413	10.203	10.4593	10.2742	10.1201	10.461	10.272	10.1075
ENSMUSG00000020656	5.43662	-6.84027e-05	0.0620991	0.96889	0.998305	Grhl1	grainyhead like transcription factor 1	12	9.8553	9.8553	9.74778	9.89111	9.98257	9.74778	9.8553	9.8553	9.80939	9.8308	9.97771
ENSMUSG00000020657	122.787	0.00808247	0.062668	0.142687	0.935103	Dnajc27	DnaJ heat shock protein family (Hsp40) member C27	12	10.3572	10.4067	10.2166	10.623	10.1838	10.447	10.4092	9.98143	10.214	10.3055	10.0305
ENSMUSG00000020659	247.91	-0.00977146	0.0628825	0.121596	0.935103	Cbll1	Casitas B-lineage lymphoma-like 1	12	10.1302	10.3967	10.5082	10.6967	10.3244	10.5165	10.5291	11.0159	10.5336	10.5738	10.4728
ENSMUSG00000020660	3.34242	0.000369704	0.0621064	0.712448	0.963116	Pomc	pro-opiomelanocortin-alpha	12	9.81703	9.96248	9.78605	9.78605	9.96001	9.78605	9.81703	9.81703	9.89275	9.92981	9.83303
ENSMUSG00000020661	511.956	-0.00265817	0.0614396	0.75862	0.969546	Dnmt3a	DNA methyltransferase 3A	12	10.4684	10.8911	10.8288	11.0776	10.8768	10.6909	10.8451	11.0809	10.8649	10.5571	10.8534
ENSMUSG00000020664	332.927	-0.0151255	0.0631435	0.286793	0.935103	Dld	dihydrolipoamide dehydrogenase	12	10.6293	10.6021	10.7147	10.4677	10.7557	10.5674	10.7603	10.6528	10.713	10.8459	10.5633
ENSMUSG00000020668	115.428	-0.00430563	0.0618835	0.547	0.935103	Kif3c	kinesin family member 3C	12	10.1954	10.2271	10.2103	10.3152	10.5242	10.245	10.4835	10.342	10.3763	10.133	10.3797
ENSMUSG00000020671	1048.87	-0.038615	0.0761036	0.0604348	0.881744	Rab10	RAB10, member RAS oncogene family	12	11.1991	11.0283	11.3152	11.1952	11.3145	11.2159	11.34	11.5893	11.4427	11.2852	11.2555
ENSMUSG00000020674	28.3317	0.000146278	0.0621152	0.402258	0.935103	Pxdn	peroxidasin	12	9.70818	9.70818	9.8949	9.9427	9.99829	9.8949	9.70818	10.5415	9.8949	9.8949	9.8949
ENSMUSG00000020677	391.66	-0.0535667	0.0975004	0.0102571	0.572911	Ddx52	DExD box helicase 52	11	10.4749	10.7844	10.6787	10.7873	10.6781	10.6191	10.9276	10.8427	10.8496	10.792	10.8972
ENSMUSG00000020680	363.767	0.00844209	0.0615974	0.507533	0.935103	Taf15	TATA-box binding protein associated factor 15	11	10.61	10.9602	10.8864	10.6785	10.5643	10.6951	10.673	10.5909	10.8001	10.6797	10.6557
ENSMUSG00000020681	0.979471	0.000728083	0.062122	0.372601	0.935103	Ace	angiotensin I converting enzyme (peptidyl-dipeptidase A) 1	11	9.81286	9.81286	9.79022	9.94866	9.79022	9.79022	9.81286	9.81286	9.79022	9.79022	9.79022
ENSMUSG00000020684	3.43587	0.000139038	0.0621085	0.86939	0.986764	Rasl10b	RAS-like, family 10, member B	11	9.8025	10.0016	9.80058	9.88335	9.90397	9.80058	9.8025	9.8025	9.80058	9.80058	9.97627
ENSMUSG00000020687	615.356	0.00933824	0.0628257	0.13498	0.935103	Cdc27	cell division cycle 27	11	11.9678	10.6045	11.0396	10.8718	10.9274	10.7574	10.5375	10.4757	11.1307	10.7717	10.7758
ENSMUSG00000020689	93.004	0.00547791	0.0622298	0.325446	0.935103	Itgb3	integrin beta 3	11	10.3593	10.1082	10.3133	10.2424	10.1267	10.1767	10.2439	10.0155	10.1692	10.2059	10.0377
ENSMUSG00000020691	58.3351	0.00342851	0.062181	0.280895	0.935103	Mettl2	methyltransferase like 2	11	9.86616	10.5055	10.1607	10.2468	10.1339	9.99941	10.1721	9.86616	10.09	10.076	10.0105
ENSMUSG00000020692	60.338	-0.000772909	0.0620342	0.793489	0.973783	Nle1	notchless homolog 1	11	9.9236	10.2002	9.98838	10.0425	10.1659	10.2234	10.2979	9.9236	9.78618	10.2554	10.1426
ENSMUSG00000020694	559.288	-0.00613321	0.061869	0.48468	0.935103	Tlk2	tousled-like kinase 2 (Arabidopsis)	11	10.939	10.5632	10.8697	10.7239	11.0174	11.0787	10.7217	11.4208	10.6609	11.0753	10.9521
ENSMUSG00000020696	113.596	-0.00393343	0.0621596	0.339372	0.935103	Rffl	ring finger and FYVE like domain containing protein	11	10.1602	10.253	10.3438	10.1079	10.0951	10.266	10.6205	9.90496	10.5161	10.073	10.2408
ENSMUSG00000020697	321.831	-0.688122	0.48461	0.00214422	0.2567	Lig3	ligase III, DNA, ATP-dependent	11	10.38	10.3756	10.441	10.665	10.6925	10.5015	11.0533	10.766	10.6731	10.722	10.8109
ENSMUSG00000020700	603.745	0.00346923	0.0609665	0.783205	0.97236	Map3k3	mitogen-activated protein kinase kinase kinase 3	11	11.1821	10.9221	11.1578	10.7264	10.9112	10.8862	10.9162	10.7816	10.7877	11.0939	11.0903
ENSMUSG00000020705	701.823	0.00635274	0.0602773	0.680847	0.954805	Ddx42	DEAD box helicase 42	11	11.0292	11.0647	11.0429	10.9834	10.8589	11.2234	10.9334	11.0409	11.1133	10.8139	11.0834
ENSMUSG00000020706	576.968	0.0136579	0.0609986	0.461038	0.935103	Ftsj3	FtsJ RNA methyltransferase homolog 3 (E. coli)	11	10.9303	10.9219	10.977	11.1493	10.8481	10.9541	10.9936	10.9263	10.8665	10.9234	10.8827
ENSMUSG00000020707	45.132	0.000830704	0.0619616	0.85582	0.983214	Rnf135	ring finger protein 135	11	9.94124	10.1343	10.3662	9.97753	10.0125	9.99838	10.1585	10.0316	9.93373	9.98595	10.1906
ENSMUSG00000020708	313.653	-0.00160555	0.0603446	0.904108	0.990764	Psmc5	protease (prosome, macropain) 26S subunit, ATPase 5	11	10.6414	10.5347	10.5834	10.665	10.7273	10.6854	10.8119	10.5815	10.7096	10.5607	10.5654
ENSMUSG00000020712	13.9429	-0.00119302	0.0621007	0.589083	0.935847	Tcam1	testicular cell adhesion molecule 1	11	10.0931	9.68394	9.91914	9.91914	9.96136	9.91914	9.95445	10.0124	9.9946	9.91914	9.91914
ENSMUSG00000020715	120.327	-0.00112763	0.0617893	0.858678	0.984225	Ern1	endoplasmic reticulum (ER) to nucleus signalling 1	11	10.1869	10.4989	10.3623	10.4005	10.0717	10.2092	10.3117	10.1943	10.1554	10.6	10.2866
ENSMUSG00000020716	469.602	-0.00557081	0.0613506	0.622267	0.942674	Nf1	neurofibromin 1	11	10.7816	10.6164	10.8346	10.9776	10.8115	10.7701	11.1224	10.7546	10.7911	10.9493	10.597
ENSMUSG00000020717	1363.11	0.0215505	0.0636718	0.278522	0.935103	Pecam1	platelet/endothelial cell adhesion molecule 1	11	11.4391	11.5419	11.3344	11.6205	11.5404	11.7081	11.3555	11.6076	11.3871	11.3778	11.4338
ENSMUSG00000020718	55.2239	0.00563131	0.0623262	0.197563	0.935103	Polg2	polymerase (DNA directed), gamma 2, accessory subunit	11	10.3558	10.158	10.0145	10.2577	10.1864	10.0617	9.94573	10.0344	10.26	9.94655	10.1376
ENSMUSG00000020719	8241.2	0.0207506	0.0635615	0.283956	0.935103	Ddx5	DEAD box helicase 5	11	13.6315	13.6082	13.2509	13.2875	13.2273	13.2015	12.9603	12.9503	13.3761	13.2352	13.4347
ENSMUSG00000020720	323.555	0.00671665	0.0618695	0.483172	0.935103	Psmd12	proteasome (prosome, macropain) 26S subunit, non-ATPase, 12	11	10.5741	10.7371	10.6289	10.7843	10.7422	10.7462	10.3757	10.9729	10.4304	10.6685	10.654
ENSMUSG00000020721	865.55	-0.0165722	0.0647697	0.05106	0.851639	Helz	helicase with zinc finger domain	11	10.6395	10.8088	11.332	10.8285	11.2363	11.071	11.6304	11.4861	11.4331	11.2911	10.7962
ENSMUSG00000020723	17.1479	0.000699488	0.0621219	0.448685	0.935103	Cacng4	calcium channel, voltage-dependent, gamma subunit 4	11	10.3421	9.85654	9.9008	9.9008	9.9008	9.9008	9.70228	9.70228	9.9008	9.9008	9.9008
ENSMUSG00000020732	110.245	0.000634239	0.061979	0.877282	0.98732	Rab37	RAB37, member RAS oncogene family	11	10.6295	10.3534	10.2901	10.2683	10.1412	10.1938	10.3307	9.76861	10.4445	10.2584	10.2976
ENSMUSG00000020733	804.084	-0.028658	0.0676249	0.163406	0.935103	Slc9a3r1	solute carrier family 9 (sodium/hydrogen exchanger), member 3 regulator 1	11	11.1613	10.9165	11.019	10.8647	11.1423	11.0878	11.1465	11.1146	11.1547	11.195	11.1297
ENSMUSG00000020736	376.864	0.0132992	0.0629104	0.281951	0.935103	Nt5c	5',3'-nucleotidase, cytosolic	11	10.9463	10.4699	10.8361	10.7697	10.7596	10.7858	10.8321	10.643	10.7015	10.6285	10.5785
ENSMUSG00000020737	679.291	0.0163427	0.0630296	0.301744	0.935103	Jpt1	Jupiter microtubule associated homolog 1	11	11.2615	10.9461	11.0288	11.2811	10.9841	10.9835	10.9585	10.9911	10.8615	11.0652	11.0709
ENSMUSG00000020738	1051.09	0.00983855	0.0611852	0.509461	0.935103	Sumo2	small ubiquitin-like modifier 2	11	11.6333	11.2657	11.3999	11.091	11.3627	11.2485	11.1738	11.1283	11.4564	11.257	11.2865
ENSMUSG00000020739	210.705	0.000122761	0.0616941	0.990437	0.999188	Nup85	nucleoporin 85	11	10.0729	10.6106	10.4828	10.7543	10.5177	10.3632	10.6295	10.6445	10.4065	10.4557	10.4453
ENSMUSG00000020740	436.104	0.0131906	0.0638347	0.0509954	0.851639	Gga3	golgi associated, gamma adaptin ear containing, ARF binding protein 3	11	11.3076	10.9661	10.5652	10.6555	11.0369	10.9094	10.2799	10.456	10.4645	10.6255	11.0097
ENSMUSG00000020741	602.416	-0.00662549	0.0622653	0.31093	0.935103	Cluh	clustered mitochondria (cluA/CLU1) homolog	11	10.3497	11.1482	10.7396	10.9389	10.9633	10.7789	10.4051	11.6927	10.9729	10.7036	11.1953
ENSMUSG00000020743	544.351	0.0168746	0.0642218	0.180949	0.935103	Mif4gd	MIF4G domain containing	11	10.8869	11.1708	10.7076	10.8908	10.834	11.0141	10.7945	10.5776	10.7994	10.7847	10.9716
ENSMUSG00000020744	278.216	0.000444585	0.0607207	0.978356	0.999188	Slc25a19	solute carrier family 25 (mitochondrial thiamine pyrophosphate carrier), member 19	11	10.7958	10.443	10.6561	10.6062	10.5557	10.535	10.6485	10.5077	10.7178	10.5311	10.5893
ENSMUSG00000020745	1233.22	-0.00461024	0.061379	0.66658	0.951577	Pafah1b1	platelet-activating factor acetylhydrolase, isoform 1b, subunit 1	11	11.0449	11.5396	11.7437	11.0343	11.3093	11.5655	11.2565	11.8231	11.5621	11.2356	11.4615
ENSMUSG00000020747	366.085	0.0088302	0.0626685	0.197704	0.935103	Tmem94	transmembrane protein 94	11	10.8116	10.5289	10.5785	11.2496	10.9545	10.4654	10.7209	10.7599	10.6123	10.4036	10.6733
ENSMUSG00000020752	288.138	-0.0298918	0.0723974	0.00584062	0.435581	Recql5	RecQ protein-like 5	11	10.448	10.6732	10.3872	10.3702	10.4044	10.3334	10.6174	10.512	10.6066	10.9358	10.9009
ENSMUSG00000020755	388.572	-0.00298231	0.0615134	0.784531	0.97236	Sap30bp	SAP30 binding protein	11	11.1023	10.5837	10.6698	10.8096	10.4128	10.7748	10.5271	10.7472	10.879	10.854	10.7806
ENSMUSG00000020766	85.3892	0.000973086	0.0619034	0.85117	0.982115	Galk1	galactokinase 1	11	10.4343	10.0443	10.1655	10.4333	10.2279	10.1082	10.4668	9.95327	10.3249	10.0991	10.2137
ENSMUSG00000020770	229.396	-0.00666322	0.0618888	0.475116	0.935103	Unk	unkempt family zinc finger	11	10.491	10.4383	10.4271	10.6959	10.3579	10.5637	10.6294	10.5387	10.4942	10.7818	10.3496
ENSMUSG00000020775	131.594	0.00861778	0.0626122	0.219159	0.935103	Mrpl38	mitochondrial ribosomal protein L38	11	10.7441	10.2382	10.4679	10.3529	10.3544	10.1649	10.1511	10.2154	10.3003	10.3912	10.3289
ENSMUSG00000020776	106.833	-0.00304791	0.0620529	0.51188	0.935103	Fbf1	Fas (TNFRSF6) binding factor 1	11	10.4523	10.148	10.3118	10.0211	10.4707	9.95706	10.2016	10.3151	10.3815	10.5514	10.2613
ENSMUSG00000020777	229.501	-0.00198757	0.0615993	0.794618	0.973823	Acox1	acyl-Coenzyme A oxidase 1, palmitoyl	11	10.5267	10.2645	10.4225	10.3242	10.7136	10.7295	10.6406	10.6564	10.5524	10.4023	10.5101
ENSMUSG00000020778	104.595	0.00425884	0.0620742	0.436402	0.935103	Ten1	TEN1 telomerase capping complex subunit	11	10.3268	10.585	10.296	10.1422	10.2586	10.3491	10.1701	10.0167	10.1548	10.5239	10.198
ENSMUSG00000020780	378.463	0.0101651	0.0624194	0.335232	0.935103	Srp68	signal recognition particle 68	11	10.9945	10.4049	10.782	10.8092	10.742	10.6207	10.7269	10.6234	10.5621	10.6598	10.6361
ENSMUSG00000020781	108.717	-0.00312335	0.062109	0.33787	0.935103	Tsen54	tRNA splicing endonuclease subunit 54	11	9.95383	10.1223	10.2397	10.1564	10.386	10.3015	10.9016	9.98897	10.0478	10.3058	10.2545
ENSMUSG00000020782	117.403	-0.00351513	0.0621861	0.273435	0.935103	Llgl2	LLGL2 scribble cell polarity complex component	11	9.81101	10.4524	10.1991	10.231	10.0415	10.1367	10.8514	9.81101	10.2368	10.4208	10.3543
ENSMUSG00000020783	495.96	-0.00992265	0.0621987	0.383297	0.935103	Ncbp3	nuclear cap binding subunit 3	11	10.8712	10.6203	10.8875	10.749	10.8452	10.8875	10.7945	11.1052	11.1762	10.6448	10.7444
ENSMUSG00000020788	3921.5	-0.013057	0.0565611	0.545606	0.935103	Atp2a3	ATPase, Ca++ transporting, ubiquitous	11	12.471	12.5113	12.4326	12.2562	12.3267	12.4102	12.3502	12.3708	12.5472	12.5088	12.4991
ENSMUSG00000020790	1184.22	0.010693	0.0598958	0.581117	0.935103	Ankfy1	ankyrin repeat and FYVE domain containing 1	11	11.3702	11.3485	11.1628	11.4904	11.3594	11.3281	11.4077	11.1588	11.4154	11.2133	11.2797
ENSMUSG00000020792	312.915	-0.00518752	0.0619479	0.483359	0.935103	Exoc7	exocyst complex component 7	11	10.473	10.5612	10.3155	10.4258	10.5536	10.9365	10.5255	10.7559	10.4921	11.0105	10.3184
ENSMUSG00000020794	340.712	-0.0274445	0.0702938	0.0195336	0.682439	Ube2g1	ubiquitin-conjugating enzyme E2G 1	11	10.372	10.5901	10.6471	10.4143	10.6242	10.5897	10.8031	10.7898	10.6831	10.999	10.5138
ENSMUSG00000020798	175.979	0.00275543	0.0617883	0.705078	0.961582	Spns3	spinster homolog 3	11	10.634	10.2502	10.2045	10.5798	10.4523	10.317	10.1664	10.5162	10.463	10.2704	10.4549
ENSMUSG00000020801	29.8896	-0.000563594	0.0619954	0.879396	0.987492	Med31	mediator complex subunit 31	11	10.0325	10.0992	10.156	9.87257	10.0937	9.9727	9.81328	10.203	10.0321	10.0207	10.1112
ENSMUSG00000020802	285.281	0.00229213	0.0617116	0.765257	0.969546	Ube2o	ubiquitin-conjugating enzyme E2O	11	10.3204	10.6526	10.2859	10.4094	10.9792	10.3587	10.5699	10.4382	10.279	10.5301	10.6245
ENSMUSG00000020803	155.43	-0.000692697	0.0617303	0.914889	0.991262	Txndc17	thioredoxin domain containing 17	11	10.2287	10.6403	10.3704	10.1742	10.5141	10.4165	10.5026	10.199	10.5615	10.2153	10.4966
ENSMUSG00000020806	586.167	-0.0180399	0.0640302	0.221329	0.935103	Rhbdf2	rhomboid 5 homolog 2	11	10.6672	10.8901	10.8348	10.8275	10.8566	10.9198	11.1539	10.8012	10.9165	10.9308	10.8604
ENSMUSG00000020807	46.6566	0.00303085	0.0621927	0.167564	0.935103	4933427D14Rik	RIKEN cDNA 4933427D14 gene	11	9.85562	10.404	10.0101	10.4239	10.1023	9.74746	10.0352	9.85562	9.98976	10.0865	9.90321
ENSMUSG00000020808	3.2576	0.000975376	0.0621234	0.35562	0.935103	Pimreg	PICALM interacting mitotic regulator	11	9.81346	9.91633	9.78962	9.78962	10.0426	9.78962	9.81346	9.81346	9.78962	9.78962	9.88357
ENSMUSG00000020810	9.07771	0.000492077	0.062119	0.5173	0.935103	Cygb	cytoglobin	11	9.74149	10.2219	9.86159	9.86159	9.86159	9.86159	9.74149	9.74149	9.86159	9.86159	9.86159
ENSMUSG00000020811	3.95114	-0.000199421	0.0621138	0.981145	0.999188	Wscd1	WSC domain containing 1	11	9.76669	10.079	9.83639	9.83639	9.83639	9.83639	9.76669	9.76669	9.83639	9.8951	9.83639
ENSMUSG00000020812	33.5885	-0.00095049	0.0620423	0.743508	0.968398	Snhg16	small nucleolar RNA host gene 16	11	9.84519	10.1739	10.1241	9.90122	10.0949	9.95718	10.2564	9.84519	10.1606	9.93393	10.0393
ENSMUSG00000020817	897.282	0.0299467	0.0698833	0.0942524	0.935103	Rabep1	rabaptin, RAB GTPase binding effector protein 1	11	11.3939	11.079	11.3682	11.2361	11.2238	11.3792	11.139	11.2326	10.9513	11.0695	11.2496
ENSMUSG00000020818	43.0334	0.00543551	0.0624068	0.0520089	0.852077	Mfsd11	major facilitator superfamily domain containing 11	11	9.95055	10.2125	10.0258	9.90958	10.2753	10.0288	9.95055	9.95055	10.0109	9.86807	9.99379
ENSMUSG00000020821	453.222	0.0119444	0.0626373	0.312676	0.935103	Kif1c	kinesin family member 1C	11	11.1815	10.6132	10.7513	10.8255	10.848	10.8144	10.6948	10.6891	10.6472	10.7399	10.9364
ENSMUSG00000020823	294.164	-0.0125098	0.0630548	0.219515	0.935103	Sec14l1	SEC14-like lipid binding 1	11	10.482	10.452	10.5725	10.7471	10.6333	10.4801	10.8226	10.6898	10.8616	10.4627	10.5238
ENSMUSG00000020827	315.459	0.00132457	0.0618174	0.823026	0.976392	Mink1	misshapen-like kinase 1 (zebrafish)	11	10.6158	11.1949	10.704	10.4557	10.4503	10.4247	10.2258	10.4195	10.6841	10.8254	10.7536
ENSMUSG00000020828	35.1904	-0.000722122	0.0621179	0.233727	0.935103	Pld2	phospholipase D2	11	10.6149	9.74093	9.92171	9.86216	9.92185	9.86216	9.74093	9.74093	10.0754	10.0059	10.0668
ENSMUSG00000020829	6.68756	-0.00115754	0.0621206	0.23442	0.935103	Slc46a1	solute carrier family 46, member 1	11	9.80987	9.80987	9.79321	9.90006	9.95109	9.83896	9.80987	10.0677	10.0506	9.79321	9.79321
ENSMUSG00000020831	114.816	-0.00258368	0.0616966	0.726335	0.966201	0610010K14Rik	RIKEN cDNA 0610010K14 gene	11	10.162	10.4603	10.3551	10.3904	10.2487	10.0585	10.3576	10.2246	10.3743	10.3287	10.3523
ENSMUSG00000020832	94.682	-0.00358418	0.0621664	0.197636	0.935103	Eral1	Era (G-protein)-like 1 (E. coli)	11	9.86162	10.0672	10.1971	9.98489	10.3752	10.339	10.3813	10.5245	10.2738	10.0677	10.223
ENSMUSG00000020834	4.67902	-0.0014965	0.0621193	0.491445	0.935103	Dhrs13	dehydrogenase/reductase (SDR family) member 13	11	9.85637	9.85637	9.88634	9.74671	9.84109	9.82595	9.85637	9.85637	9.9509	9.94994	9.79369
ENSMUSG00000020840	277.441	0.0083023	0.0621713	0.407434	0.935103	Blmh	bleomycin hydrolase	11	10.6244	10.6404	10.8458	10.685	10.4006	10.5975	10.3783	10.7277	10.395	10.5425	10.6825
ENSMUSG00000020841	23.1592	-0.000870568	0.0620714	0.678218	0.953751	Cpd	carboxypeptidase D	11	9.80012	9.98548	9.88718	10.0056	10.1425	10.0174	9.87673	10.2977	9.84653	9.98851	10.0423
ENSMUSG00000020843	220.105	0.00299071	0.0621349	0.287871	0.935103	Timm22	translocase of inner mitochondrial membrane 22	11	11.244	10.6505	10.2822	10.2696	10.3611	10.599	9.68704	10.0696	10.6065	10.4135	10.3576
ENSMUSG00000020844	110.771	0.00311849	0.0620935	0.443281	0.935103	Nxn	nucleoredoxin	11	10.713	10.1744	10.1354	10.274	10.4339	10.223	9.79052	10.3664	10.2379	10.2031	10.3203
ENSMUSG00000020846	30.8531	0.00329817	0.0621939	0.15529	0.935103	Rflnb	refilin B	11	9.91703	10.1936	9.99779	10.1781	9.82602	9.98902	9.91703	9.91703	10.0056	9.86691	10.0399
ENSMUSG00000020847	22.4984	0.000302314	0.062092	0.843752	0.98031	Rph3al	rabphilin 3A-like (without C2 domains)	11	9.85012	10.1666	9.75296	9.75296	9.93195	10.1401	9.92674	9.85012	10.2359	9.88421	9.94076
ENSMUSG00000020849	1969.07	0.00960678	0.0615794	0.496178	0.935103	Ywhae	tyrosine 3-monooxygenase/tryptophan 5-monooxygenase activation protein, epsilon polypeptide	11	11.804	11.928	12.1325	11.4111	11.9482	11.7109	11.9754	11.3908	11.8363	11.7816	11.601
ENSMUSG00000020850	4698.77	-0.0109432	0.0595886	0.583894	0.935103	Prpf8	pre-mRNA processing factor 8	11	12.7523	12.6836	12.6555	12.5079	12.5583	12.5432	12.4478	12.6865	12.5131	13.0239	12.6959
ENSMUSG00000020857	805.887	0.00418341	0.0610848	0.731509	0.967175	Nme2	NME/NM23 nucleoside diphosphate kinase 2	11	11.2983	10.9547	10.991	11.4147	11.2556	11.0367	10.8868	11.4257	10.9668	11.1804	11.1445
ENSMUSG00000020859	1024.84	0.0199	0.0658598	0.0752507	0.924167	Spag9	sperm associated antigen 9	11	11.6499	11.0451	11.536	11.3798	11.0852	11.5624	11.4701	10.8491	10.9523	11.1152	11.1439
ENSMUSG00000020863	1305.96	0.00654306	0.0609588	0.632454	0.945707	Luc7l3	LUC7-like 3 (S. cerevisiae)	11	11.6346	11.185	11.6686	11.3801	11.6094	11.3961	11.7355	11.2484	11.2258	11.4958	11.3803
ENSMUSG00000020864	431.444	0.000222728	0.060931	0.997767	0.999508	Ankrd40	ankyrin repeat domain 40	11	10.8507	10.8557	10.8567	10.6249	10.7657	10.7991	10.8199	10.6111	11.0723	10.5881	10.7836
ENSMUSG00000020865	21.7933	0.00162715	0.0621184	0.292304	0.935103	Abcc3	ATP-binding cassette, sub-family C (CFTR/MRP), member 3	11	9.88179	10.1335	10.0753	9.72129	9.81567	10.1317	9.88179	9.88179	9.95566	10.0678	9.84556
ENSMUSG00000020866	2.18315	-0.00054249	0.0621113	0.877845	0.98732	Cacna1g	calcium channel, voltage-dependent, T type, alpha 1G subunit	11	9.76358	9.93411	9.8395	9.8395	9.8395	9.8395	9.76358	9.92162	9.88307	9.8395	9.8395
ENSMUSG00000020868	81.1564	-0.000414212	0.0619574	0.912521	0.991262	Xylt2	xylosyltransferase II	11	10.0593	10.3518	10.1165	10.1561	10.111	10.2985	10.3992	9.89355	10.2949	10.0844	10.1703
ENSMUSG00000020869	403.382	0.0054852	0.0609224	0.684558	0.955797	Lrrc59	leucine rich repeat containing 59	11	10.6589	10.7551	10.9705	10.7236	10.596	10.7652	10.7485	10.7518	10.7136	10.5216	10.8096
ENSMUSG00000020872	0.865738	0.000195182	0.0621148	0.703522	0.960794	Tac4	tachykinin 4	11	9.7953	9.7953	9.80778	9.80778	9.80778	9.91007	9.90364	9.7953	9.80778	9.80778	9.80778
ENSMUSG00000020873	133.702	0.00147427	0.0619876	0.712776	0.963116	Slc35b1	solute carrier family 35, member B1	11	10.3801	10.6774	10.3405	10.185	10.2226	10.3194	10.353	9.83329	10.3962	10.4207	10.2922
ENSMUSG00000020876	210.572	-0.0106434	0.0631438	0.0604361	0.881744	Snx11	sorting nexin 11	11	10.1037	10.239	10.3714	10.4043	10.5534	10.513	10.7372	10.7386	10.5374	10.2554	10.5475
ENSMUSG00000020877	40.4341	-0.000859587	0.0619806	0.835133	0.978256	Scrn2	secernin 2	11	10.206	9.939	10.1518	9.83454	10.1979	9.97645	9.94447	10.1965	10.12	10.128	10.0918
ENSMUSG00000020882	17.0672	-0.00225713	0.0621584	0.0830534	0.932339	Cacnb1	calcium channel, voltage-dependent, beta 1 subunit	11	9.84193	9.84193	9.76115	9.93338	9.76115	10.0196	9.84193	10.1946	10.1424	9.92187	9.97109
ENSMUSG00000020883	397.402	0.0109142	0.062927	0.208103	0.935103	Fbxl20	F-box and leucine-rich repeat protein 20	11	10.5848	10.9061	10.6959	11.0165	10.9146	10.5836	10.799	10.5193	10.2477	10.7169	10.7411
ENSMUSG00000020888	151.325	-0.00362311	0.0619597	0.515009	0.935103	Dvl2	dishevelled segment polarity protein 2	11	10.2711	10.1131	10.1439	10.5188	10.4544	10.4052	10.4209	10.5372	10.4482	10.1732	10.2054
ENSMUSG00000020889	4.36849	-7.79195e-06	0.0620998	0.993148	0.999188	Nr1d1	nuclear receptor subfamily 1, group D, member 1	11	9.78367	9.92912	9.81941	9.81941	9.93878	9.94878	9.78367	9.99431	9.81941	9.81941	9.94368
ENSMUSG00000020892	2.39744	-0.000210778	0.0621071	0.950434	0.99622	Aloxe3	arachidonate lipoxygenase 3	11	9.82441	9.82441	9.77867	9.93712	9.77867	9.89073	9.87858	9.82441	9.92312	9.77867	9.77867
ENSMUSG00000020893	442.327	-0.00244489	0.0615977	0.767517	0.970174	Per1	period circadian clock 1	11	10.639	11.122	10.6049	10.5751	10.6632	10.7724	10.4394	10.799	10.9516	10.605	11.0768
ENSMUSG00000020894	369.386	-0.0109563	0.0627296	0.256437	0.935103	Vamp2	vesicle-associated membrane protein 2	11	10.3379	10.6225	10.5085	10.5713	10.6263	10.7005	10.6642	10.7848	10.5031	10.5711	10.7356
ENSMUSG00000020895	1.9832	-0.000158675	0.0621082	0.894601	0.989676	Tmem107	transmembrane protein 107	11	9.81323	9.81323	9.78985	9.78985	9.96885	9.78985	9.81323	9.88776	9.78985	9.78985	9.90491
ENSMUSG00000020897	76.1506	-0.00359643	0.0621478	0.333053	0.935103	Aurkb	aurora kinase B	11	9.78971	10.203	10.4048	10.1572	10.0592	10.0229	10.2721	10.4546	10.0437	10.3715	10.1997
ENSMUSG00000020898	143.574	0.00304027	0.0621085	0.389499	0.935103	Ctc1	CTS telomere maintenance complex component 1	11	10.5778	10.5756	10.2908	10.3315	10.3256	10.2654	10.2105	9.86442	10.0611	10.6804	10.1947
ENSMUSG00000020899	290.925	-0.00218625	0.0618427	0.694153	0.958894	Pfas	phosphoribosylformylglycinamidine synthase (FGAR amidotransferase)	11	10.2136	10.5175	10.677	10.999	10.3846	10.451	10.9604	10.6049	10.3745	10.5536	10.5788
ENSMUSG00000020901	167.218	0.00347375	0.0615371	0.721736	0.964568	Pik3r5	phosphoinositide-3-kinase regulatory subunit 5	11	10.3884	10.3473	10.1974	10.686	10.2739	10.2502	10.3618	10.3115	10.4297	10.2638	10.365
ENSMUSG00000020903	240.877	0.00355397	0.0618596	0.578244	0.935103	Stx8	syntaxin 8	11	10.4062	10.3291	10.8085	10.7767	10.4799	10.4743	10.5748	10.801	10.4163	10.3907	10.3481
ENSMUSG00000020910	56.7425	0.00675491	0.0624957	0.143483	0.935103	Adprm	ADP-ribose/CDP-alcohol diphosphatase, manganese dependent	11	10.3168	10.2573	10.0892	10.2644	10.1244	10.1617	10.1296	9.82846	10.0357	10.1737	10.0821
ENSMUSG00000020914	308.983	-0.00464254	0.0618025	0.600564	0.938271	Top2a	topoisomerase (DNA) II alpha	11	10.4126	10.9907	10.5421	10.4557	10.7175	10.5316	10.7729	10.3514	10.7337	10.8876	10.555
ENSMUSG00000020917	1119.23	-0.0189801	0.0645527	0.172407	0.935103	Acly	ATP citrate lyase	11	11.1188	11.0652	11.3649	11.4217	11.4416	11.2289	11.5389	11.6909	11.3646	11.5223	11.1302
ENSMUSG00000020918	259.672	-0.00175004	0.0611809	0.855654	0.983214	Kat2a	K(lysine) acetyltransferase 2A	11	10.7599	10.2967	10.5436	10.4678	10.5722	10.5899	10.6363	10.5146	10.5305	10.5188	10.6405
ENSMUSG00000020919	744.554	-0.00328127	0.0610662	0.777402	0.971076	Stat5b	signal transducer and activator of transcription 5B	11	10.8021	11.0956	11.2795	10.87	11.1324	11.1409	11.0234	11.3589	11.2411	10.974	10.852
ENSMUSG00000020921	49.6175	0.00545655	0.0623136	0.18966	0.935103	Tmem101	transmembrane protein 101	11	9.92335	10.239	10.1081	10.2913	10.299	10.0653	10.0402	10.2702	10.057	10.014	9.99267
ENSMUSG00000020922	535.978	-0.0116151	0.0625141	0.317731	0.935103	Lsm12	LSM12 homolog	11	10.8864	10.5854	10.9008	11.0108	10.7249	10.8957	10.889	11.1767	10.8532	10.7239	11.0814
ENSMUSG00000020923	1402.69	-0.00239446	0.0610712	0.826901	0.976517	Ubtf	upstream binding transcription factor, RNA polymerase I	11	11.5457	11.6919	11.5644	10.9865	11.3383	11.7343	11.4596	11.284	11.374	11.5537	11.9161
[truncated: 16,011 more rows]

## Sheet: Sheet1
ensembl_gene_id	baseMean	log2FoldChange	lfcSE	pvalue	padj	external_gene_name	description	chromosome_name	NT_REP1	NT_REP2	NT_REP3	NT_REP4	NT_REP5	NT_REP6	WT_REP1	WT_REP2	WT_REP3	WT_REP4	WT_REP5
ENSMUSG00000032042	666.096	-0.62105	0.343808	0.00149011	0.199378	Srpr	signal recognition particle receptor ('docking protein')	9	10.7673	10.669	10.9604	10.7766	11.0651	10.9419	11.3642	11.2762	11.2565	10.9251	11.2087
ENSMUSG00000031264	983.973	-0.597191	0.205366	0.000115429	0.0241433	Btk	Bruton agammaglobulinemia tyrosine kinase	X	11.0509	10.9425	11.0909	11.2197	11.2918	11.1378	11.5439	11.5613	11.497	11.3161	11.3693
ENSMUSG00000030104	1577.28	-0.517209	0.355789	0.00285175	0.30347	Edem1	ER degradation enhancer, mannosidase alpha-like 1	6	11.3334	11.1849	11.2348	11.2309	11.7589	11.2454	11.7365	11.8273	11.8718	11.4177	11.8842
ENSMUSG00000041417	1416.55	-0.176489	0.315287	0.0113066	0.582848	Pik3r1	phosphoinositide-3-kinase regulatory subunit 1	13	11.5226	11.3817	11.5166	11.3111	11.5153	11.3327	11.4799	11.7189	11.6559	11.6804	11.6683
[truncated: 56 more rows]
